# Supplementary material for: Large scale microfluidic CRISPR screening for increased amylase secretion in yeast
Source: Royal Society of Chemistry journal article supplement (doi:10.1039/d3lc00111c), 2023-01-01

### SUT460 on chr4

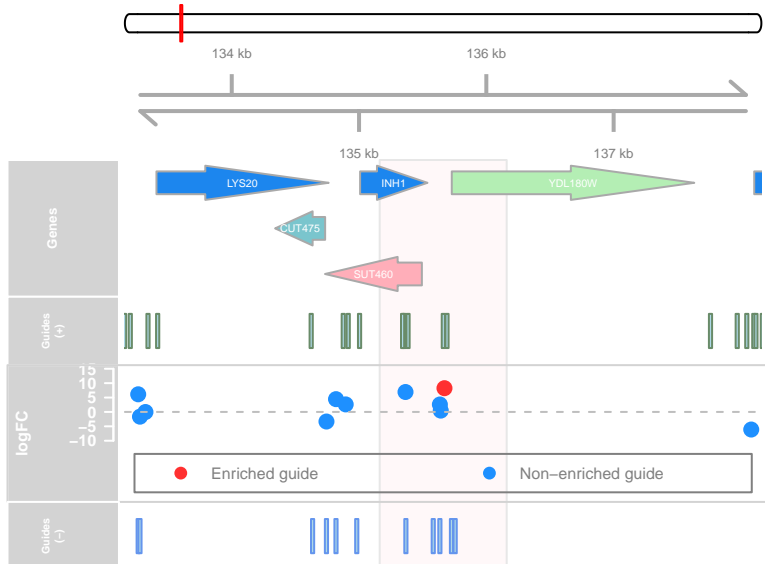

### CUT598 on chr7

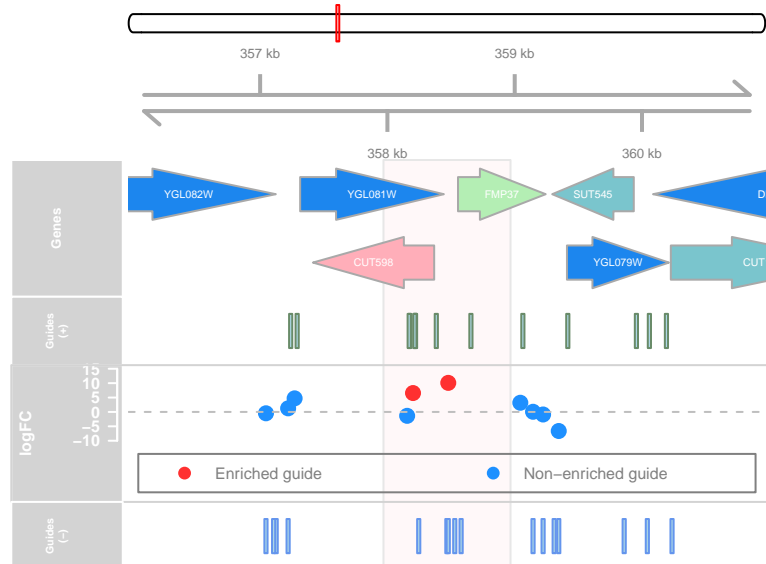

### SUT573 on chr8

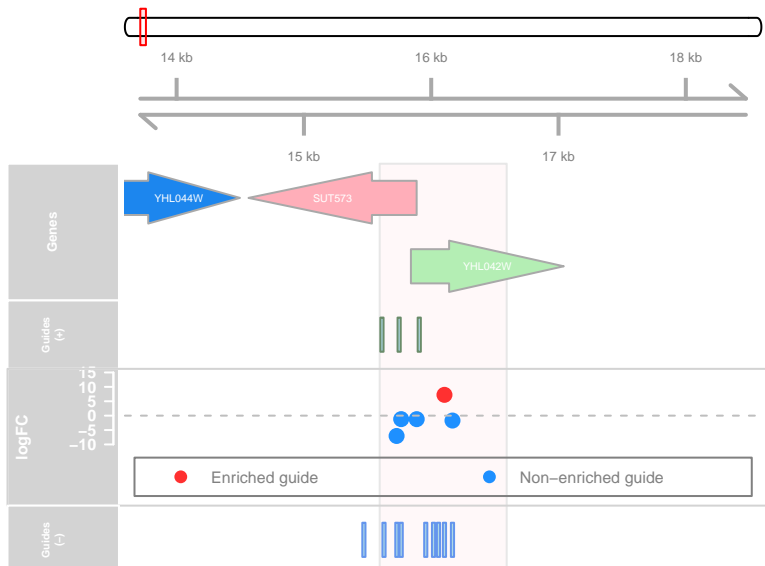

### CUT643 on chr8

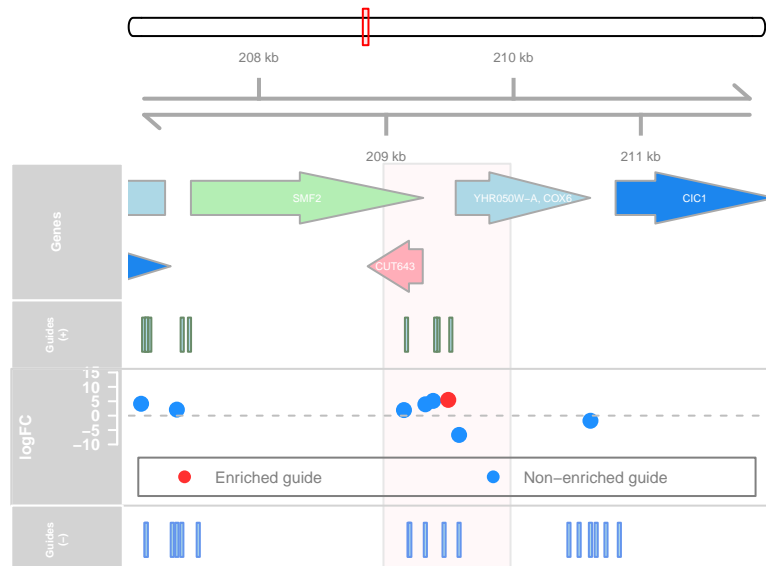

### CUT213 on chr10

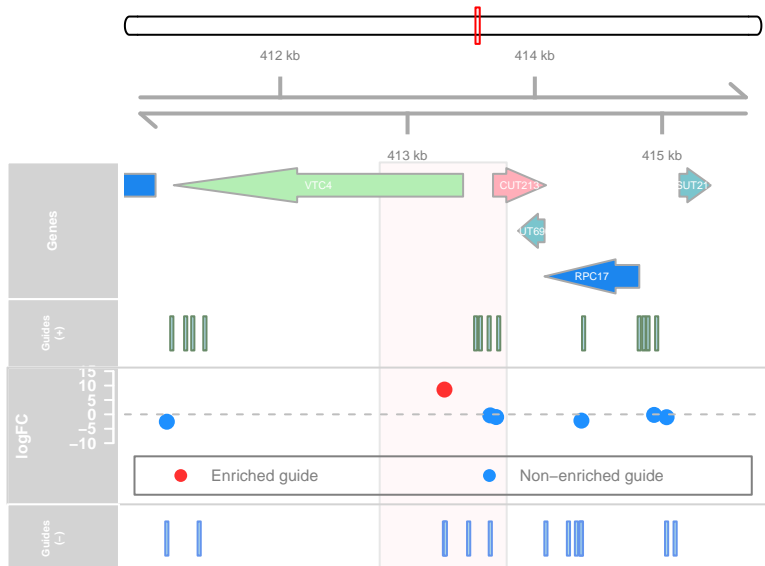

### SUT251 on chr12

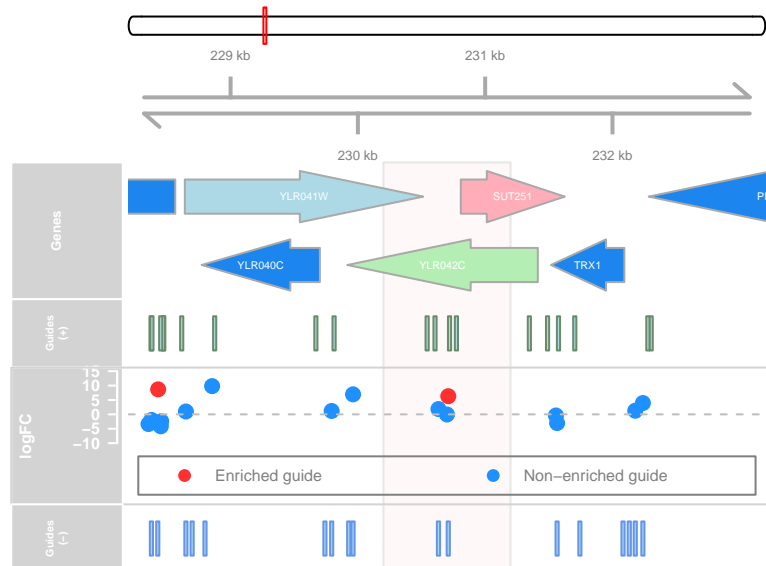

## CUT276 on chr12

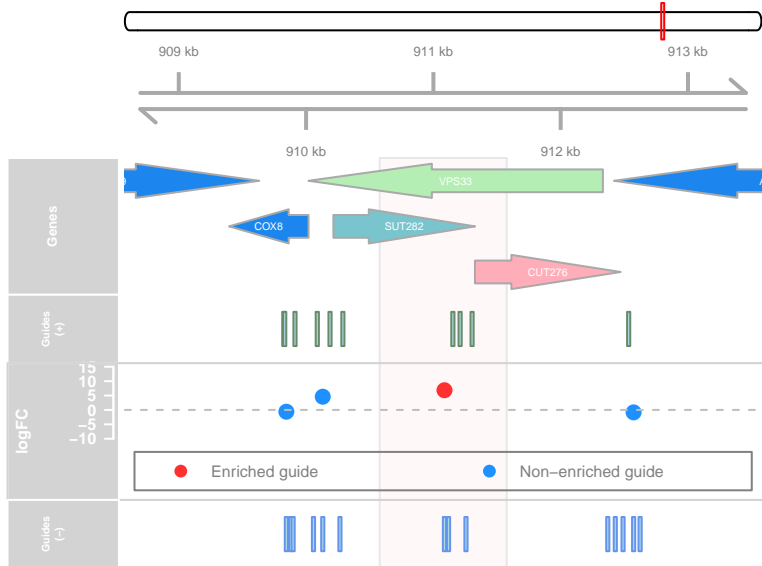

## SUT711 on chr12

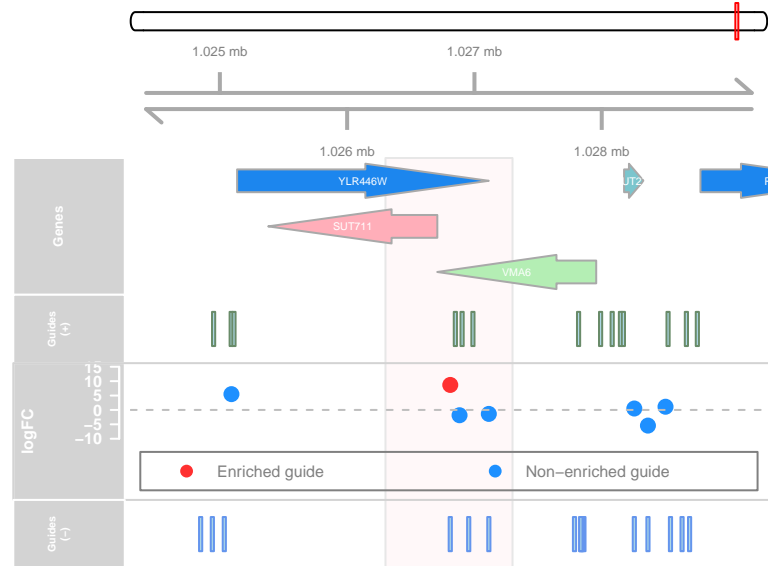

## SUT311 on chr13

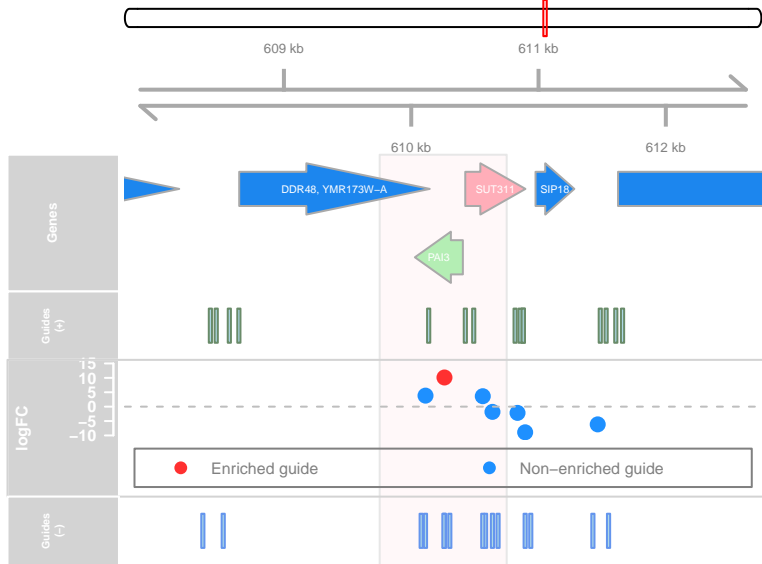

## SUT751 on chr14

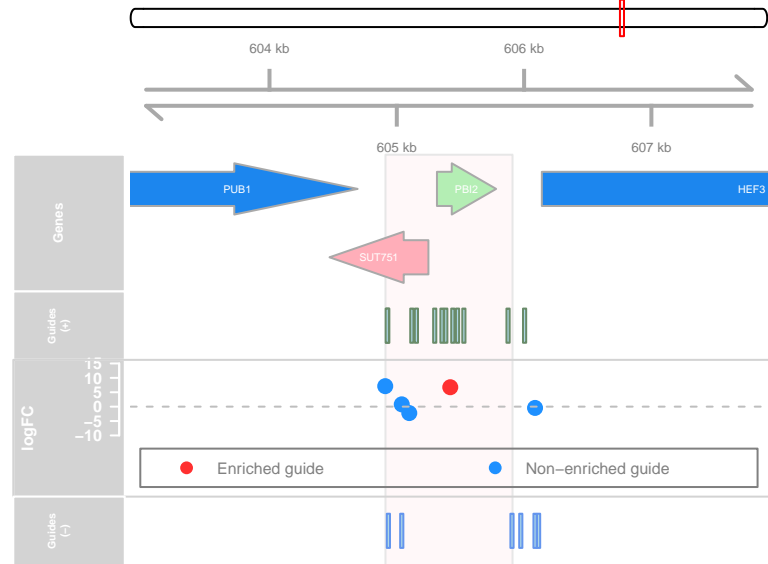

## CUT896 on chr16

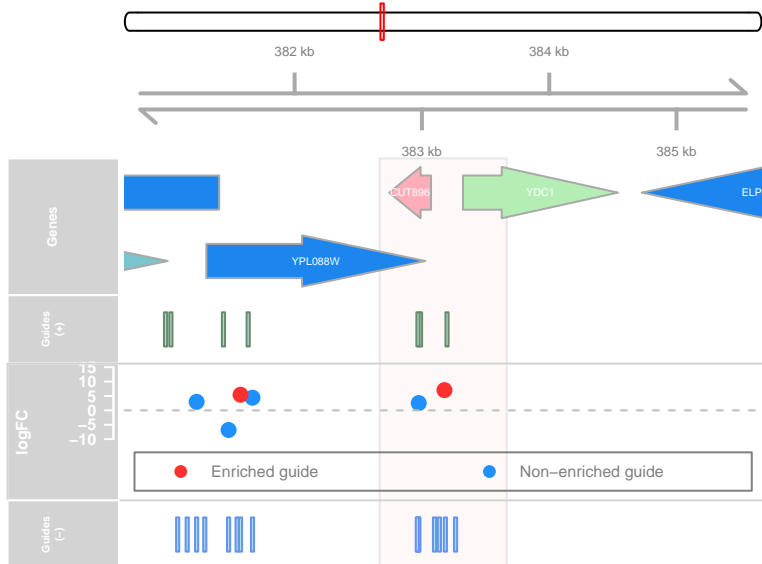

## CUT907 on chr16

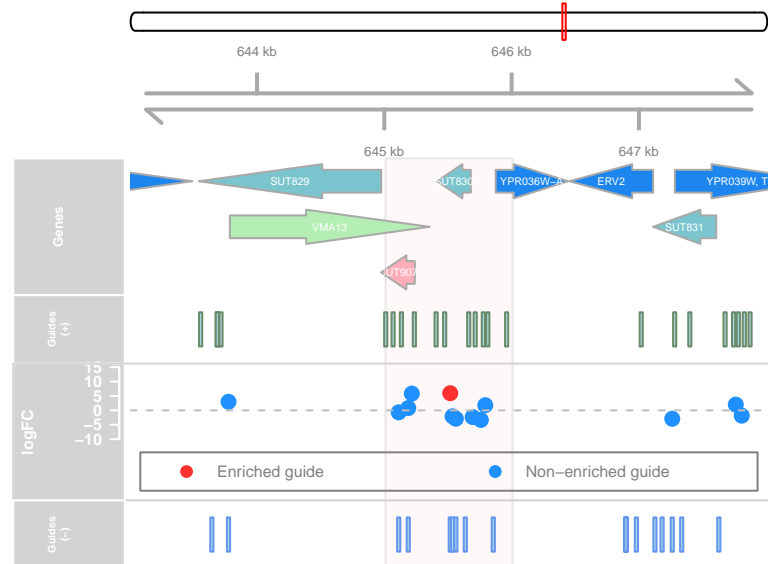

## SUT428 on chr16

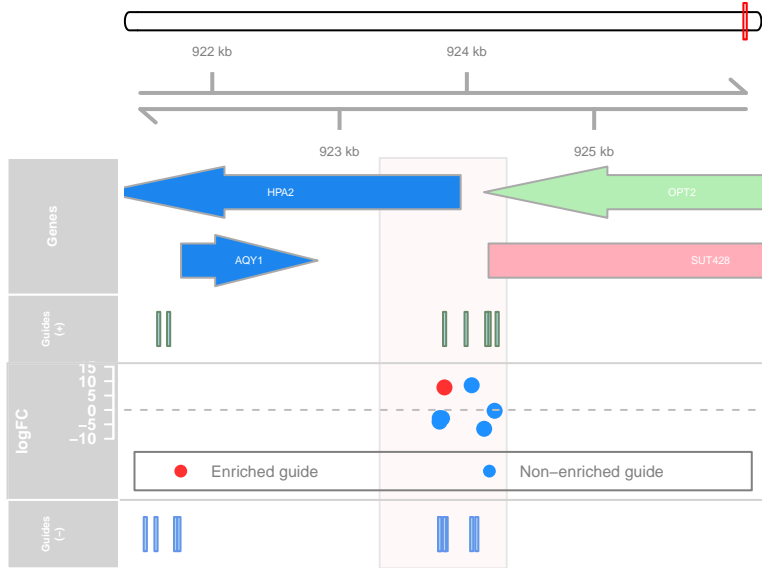

## CUT586 on chr7

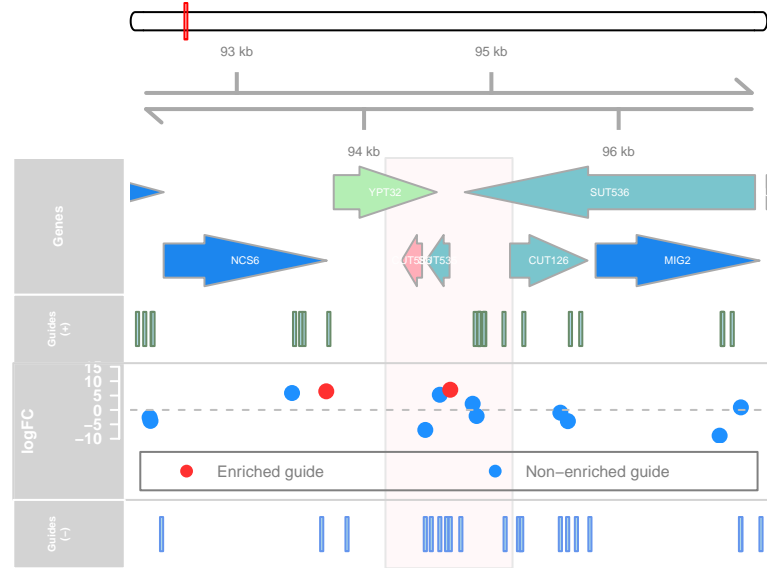

## CUT727 on chr11

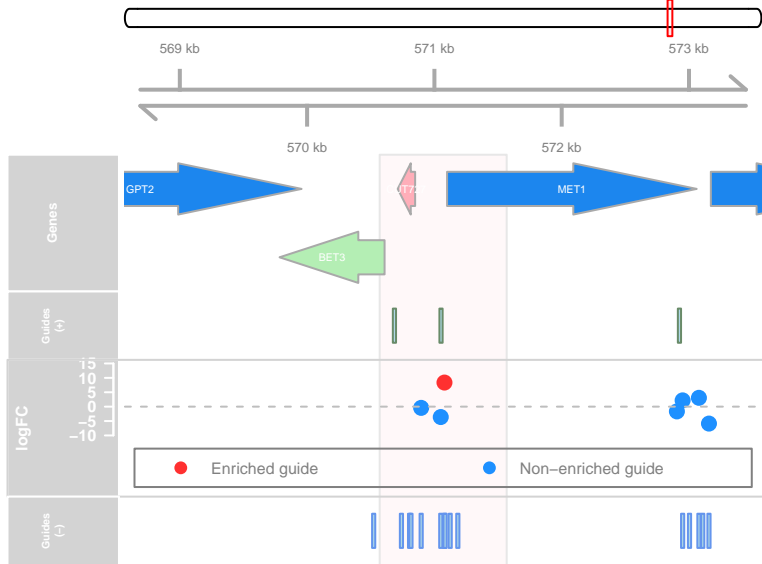

## CUT480 on chr4

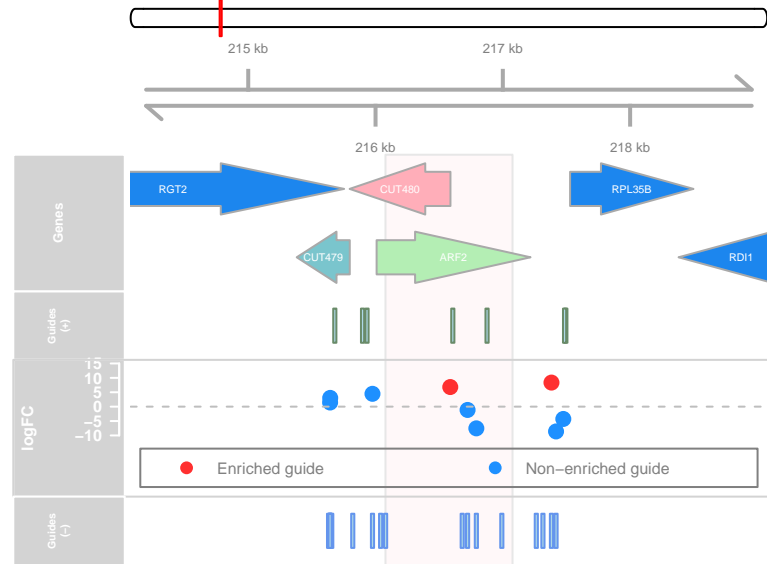

## SUT128 on chr7

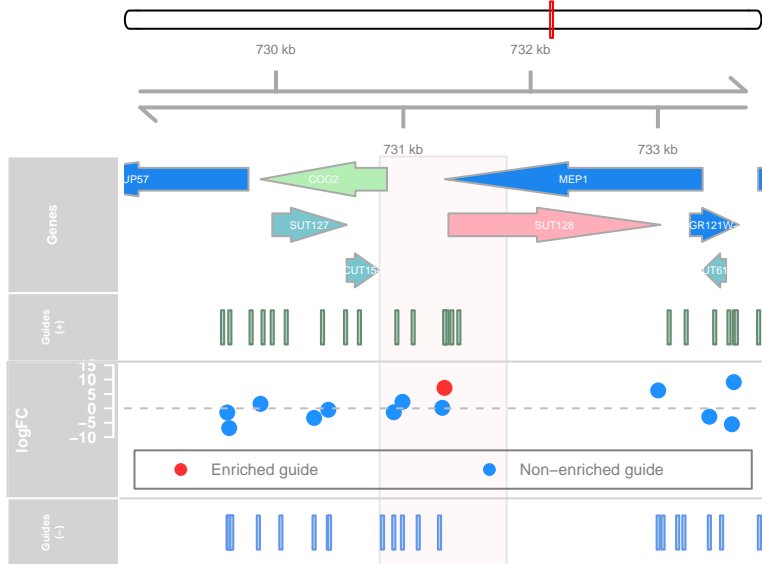

Supplement: d3lc00111c2.pdf [file d3lc00111c2.pdf]
