# Supplementary material for: Large scale microfluidic CRISPR screening for increased amylase secretion in yeast
Source: Royal Society of Chemistry journal article supplement (doi:10.1039/d3lc00111c), 2023-01-01

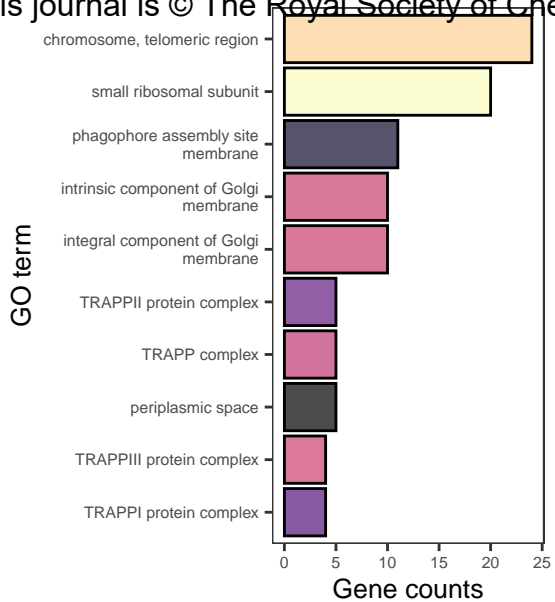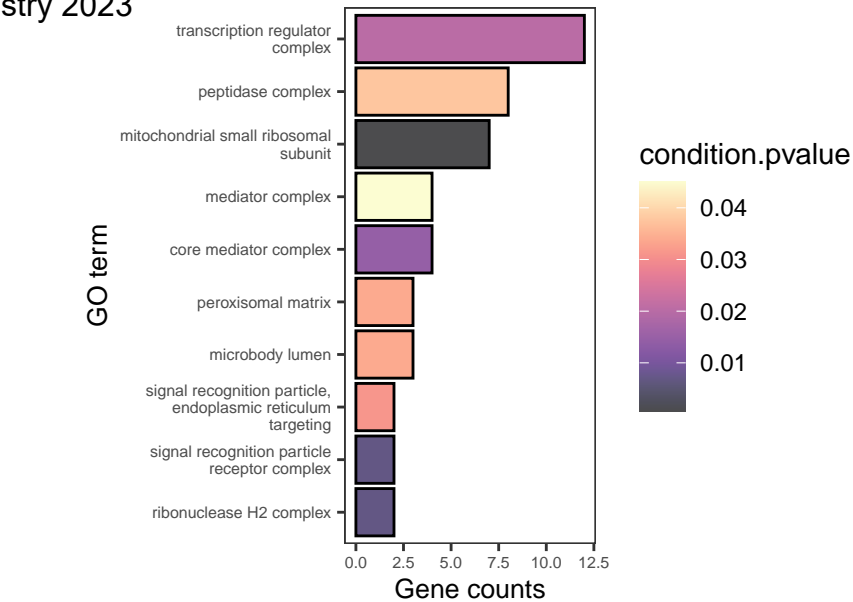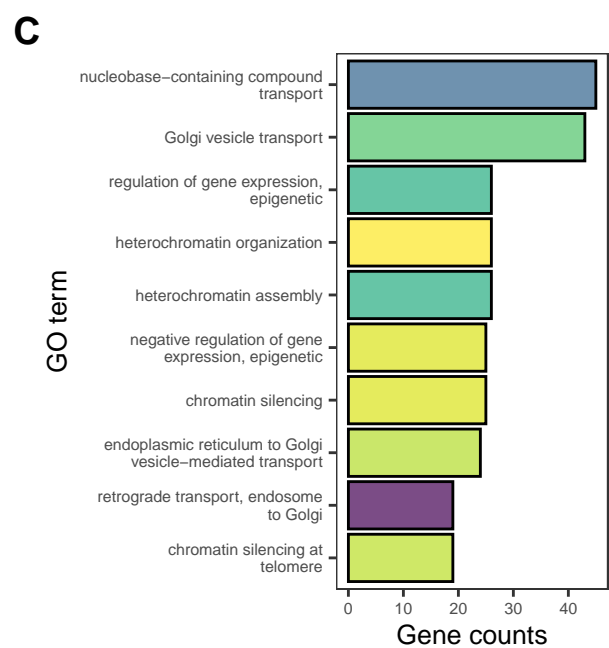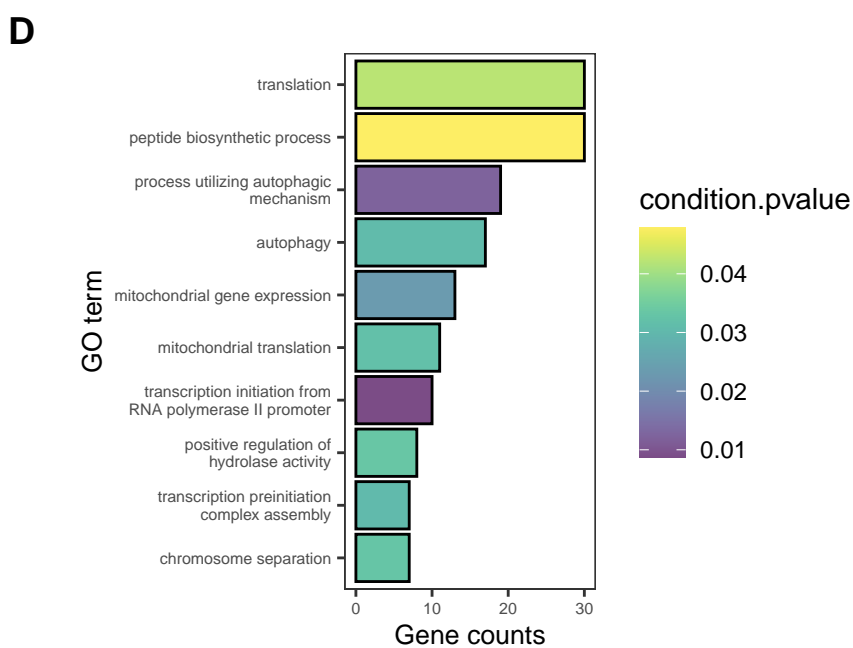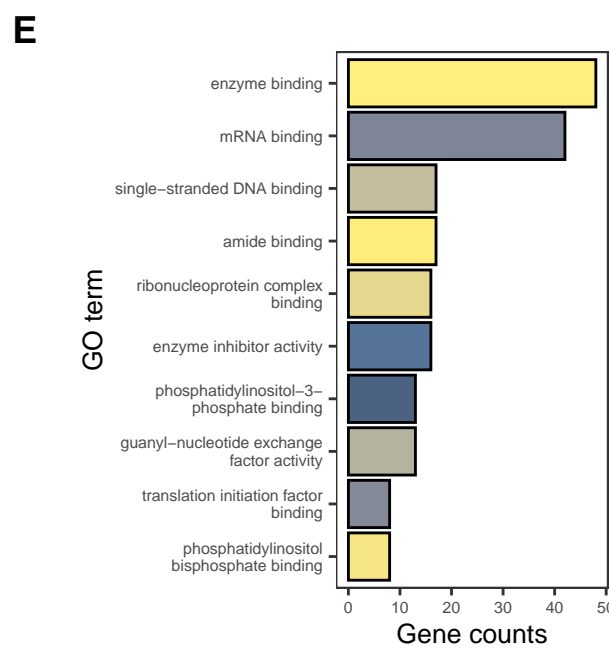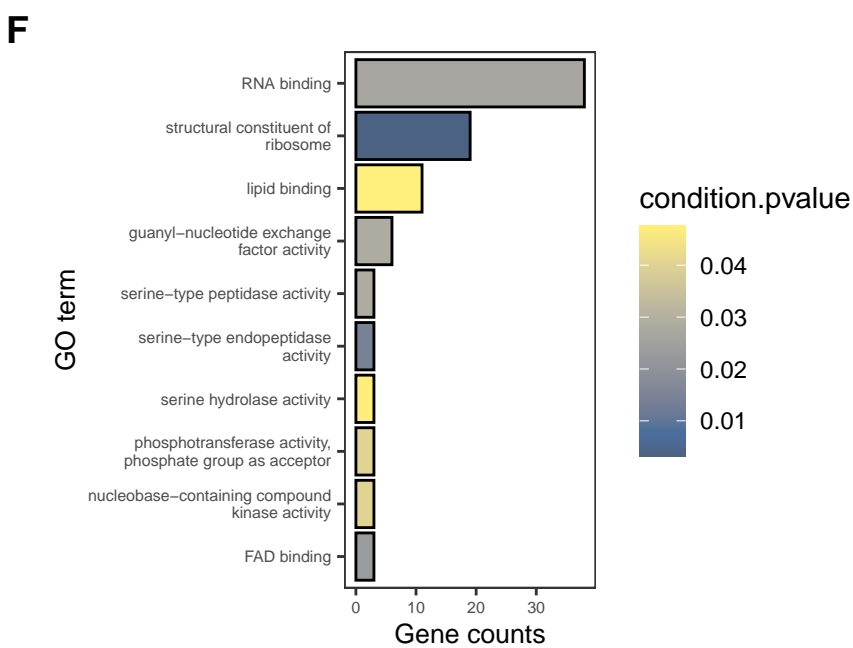

Supplement: d3lc00111c1.pdf [file d3lc00111c1.pdf]
