# Supplementary material for: Large scale microfluidic CRISPR screening for increased amylase secretion in yeast
Source: Royal Society of Chemistry journal article supplement (doi:10.1039/d3lc00111c), 2023-01-01

# SUT433 on chr1

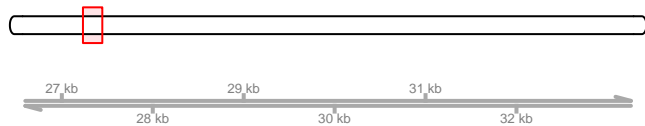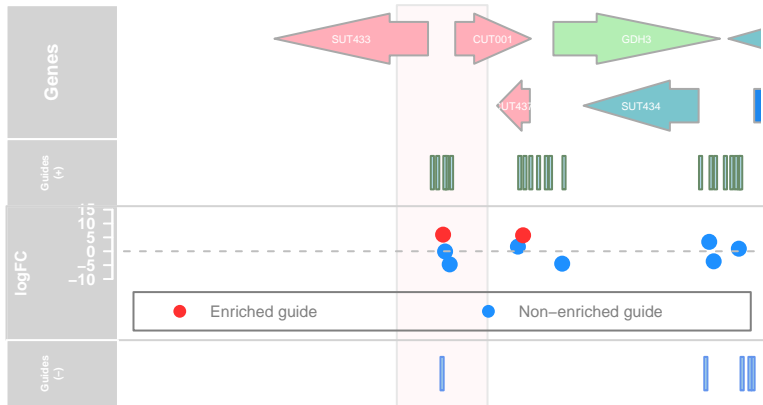

# CUT361 on chr15

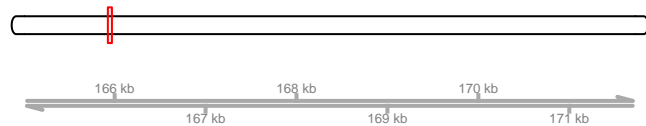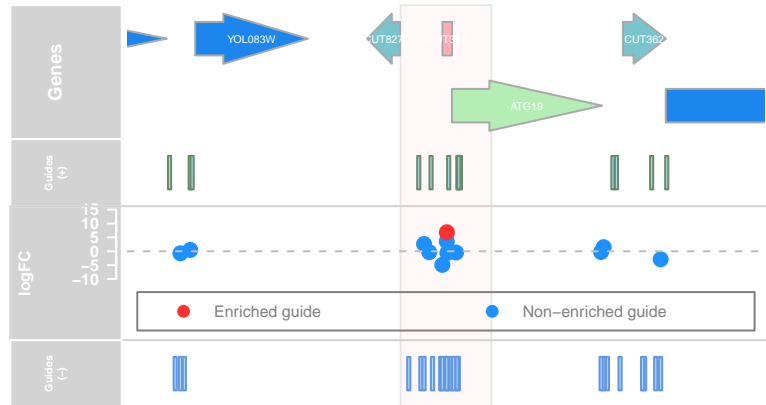

Supplement: d3lc00111c3.pdf [file d3lc00111c3.pdf]
