# Supplementary material for: Large scale microfluidic CRISPR screening for increased amylase secretion in yeast
Source: Lab Chip. Author manuscript; Available in PMC 2023 Aug 15. (PMC7614956; doi:10.1039/d3lc00111c)
Supplement: ESI 6 [file EMS184631-supplement-ESI_6.xlsx]

## Sheet: README
Table S1: Guides and results for activation and repression screens
Tabs	Description
Guides	Guide RNA sequences and positions
Activation_screens_main	Results from statistical analysis of low coverage activation screen data
Activation_screens_main	Results from statistical analysis of activation screen data
Repression_screens_main	Results from statistical analysis of repression screen data
Significant_genes_main	Significant genes (FDR < 0.05, logFC > 3) from activation and repression screens
Guides
Header	Description
Guide	Guide sequence
Chr	Target chromosome
Strand	Target strand
Pos	Target position
PAM	PAM sequence
Activation_screen_low_coverage
Header	Description
Guide	Guide sequence
Gene	Target gene
logFC	Log fold change
logCPM	Average log2-counts-per-million
LR	Likelihood ratio statistics
PValue	Two-sided p-value
FDR	Adjusted p-value
Library	Gene repression or activation
Activation_screens_main
Header	Description
Guide	Guide sequence
Gene	Target gene
logFC	Log fold change
logCPM	Average log2-counts-per-million
LR	Likelihood ratio statistics
PValue	Two-sided p-value
FDR	Adjusted p-value
Library	Gene repression or activation
Repression_screens_main
Header	Description
Guide	Guide sequence
Gene	Target gene
logFC	Log fold change
logCPM	Average log2-counts-per-million
LR	Likelihood ratio statistics
PValue	Two-sided p-value
FDR	Adjusted p-value
Library	Gene repression or activation
Significant_genes_main
Header	Description
Guide	Guide sequence
Gene	Target gene
logFC	Log fold change
logCPM	Average log2-counts-per-million
LR	Likelihood ratio statistics
PValue	Two-sided p-value
FDR	Adjusted p-value
Library	Gene repression or activation

## Sheet: Guides
Guide	Chr	Strand	Pos	PAM
TGTAATTTCAATAGCTCGCG	chr7	+	736347	TGG
TGCGAGTGCGATTAGATTTG	chr4	-	184600	AGG
GAAAAAGTAAGTAAATAAGA	chr8	+	81749	GGG
TGAGTAGTCGTCGATATCAA	chr2	+	716573	AGG
AAGATATACGTTATTGATAT	chr15	-	959146	AGG
TAAGCGATGAAGCAACCAGA	chr16	+	369733	TGG
ATATGAATGATCTTAAGAAA	chr9	-	396907	AGG
TGGCGGGAGAAATAAAAGCG	chr7	-	977016	GGG
TGCTGGTTTGGAGGTAGCGT	chr7	+	968562	AGG
ACAATCAGCTACCATAATAC	chr4	+	1130744	TGG
TCCCCACAATAAATTTCGCA	chr13	-	653068	AGG
ATTTATACATGCTAATTGAC	chr9	-	348722	GGG
TAATAATACGACCACAGCAG	chr7	-	610261	AGG
AAAATCTAAATGTCTTCTTT	chr16	-	444122	GGG
CAGGGACGAAGCAATGAGTG	chr5	+	188284	CGG
TTTGTTTTGCTTATTGAATA	chr13	-	56397	TGG
AAATTCCGAAGCATGTAGGG	chr14	-	703274	AGG
TTGATCTATCTTGTTAAAGG	chr11	+	79054	AGG
TGCCCCTTTAATGAAACGGT	chr11	-	143347	TGG
GGGAGCGGAGATATTTTCGG	chr15	-	55235	AGG
AGAGGACTATCTGATCATTG	chr4	+	1259844	GGG
AATCATTCAATTTAGGAGTC	chr14	+	699367	TGG
TTTTTTCAGAAACCCCAACA	chr11	-	91662	AGG
TCTTTTTAAAGAAAGAAACA	chr3	-	252706	AGG
GCAACAAGATAAAGAGATAA	chr4	+	1319993	GGG
CTAGGTAACGATTACGTCAG	chr9	-	330593	AGG
AACGAAAAGAAACAGGCTAT	chr5	+	118146	AGG
TGGTCGTCAAAAAATAGGAA	chr7	-	388785	AGG
AGGCACCTCGATCGAGATTG	chr11	-	6192	AGG
ACATTTAGGACGGTGAAGCT	chr14	-	440945	AGG
GCATACGCCAAGACAAACCG	chr15	-	661706	TGG
CTTGCTTAATTTCAAGAAAG	chr7	+	254179	GGG
AAAGTGCTATATTTATTCAA	chr10	-	134071	GGG
CTTGGTGAATCGAGTTAATG	chr4	+	78135	TGG
TTTGCATTGGGCCATTCAGA	chr12	+	790124	AGG
GGTTAAAAAGAAAAGAGAGA	chr7	-	795707	AGG
TACATACCTTCATCGGACAA	chr4	+	1030571	AGG
TTCTTTGCAAGAAAGACCAA	chr7	+	58844	AGG
ATCCCAATTAAATTAGCAGA	chr8	-	140004	TGG
TCACATTCGTTAAAACCTAG	chr7	-	731274	AGG
TTTAAAATAAGTATTGAAAA	chr4	+	248231	AGG
GCAGAACTTCATTCAGCTTT	chr15	+	1028094	TGG
TTATCTGTAGAATCTACACA	chr12	-	168843	GGG
GTGCTCGGTTTACTGTGCTA	chr4	-	1383355	CGG
ACACGAGTACAATAACACGA	chr15	-	437234	AGG
GGTTTGTTGCCGGTGGTATA	chr11	+	70347	CGG
TACTCACCAAGAACAATAGC	chr2	-	369923	AGG
GCTTAGTACCGTGAAAATCT	chr11	+	125550	TGG
GCATAGCGGTAACATCCAAT	chr4	+	1301932	TGG
CAGCCGAAGTCATTGTTCAG	chr15	-	573165	AGG
CAGTGCAGTTGAAAAAATCG	chr9	+	187882	AGG
TAAGCTGAGAGGATTTGAGA	chr4	-	407255	GGG
AGTACTCTAGTACACAGTAA	chr13	-	462827	TGG
CTTGCAGAACACAATAAGTG	chr8	-	122107	TGG
GCACTAAACTAGAGGAAAGA	chr2	+	191898	AGG
TTTGTAAGTGTCTTCAAGCG	chr4	-	245829	AGG
TCATTTAGCAACATGATTTA	chr11	-	130477	AGG
CATGCCTCTAGAAAGCCAGA	chr7	-	965790	AGG
GTTTTCTGAAATCTATAACA	chr7	-	579188	GGG
AATTTAGGGATGCTCGCTTG	chr2	-	536546	AGG
AAAGGCAGTATGTGAAACGC	chr8	-	298795	AGG
ACTTAAGTGTCACCCGCCTG	chr16	+	321956	GGG
TCGTAGTTCTCTCGAACAGG	chr13	+	167522	AGG
ATCCAAGATGAAGTCAACCT	chr5	-	11617	AGG
GCTTACCACCGTATAACTCT	chr14	+	112797	GGG
ACTTGCGATGAGAACTAAAG	chr11	+	255211	TGG
CCTCGATACATGACCACAGA	chr10	+	83540	GGG
TTTAGTTATGACGTACGGTG	chr11	-	260728	CGG
TGGTATGGTGAAATGGTCGT	chr12	+	196503	TGG
ATGATCTTGTTTCTACCACA	chr10	+	421520	GGG
AGAATGGGAAAAACAAACTG	chr13	-	347055	CGG
TTAACAGAAAGCATGCTCAG	chr15	-	220797	AGG
AAAGTACAAAGAGTGCATGA	chr12	-	131237	AGG
TGCGCAGTATCCATAGTCAT	chr2	-	462136	TGG
ATTGGTGGTGTCCTAGCTGT	chr1	+	62497	GGG
TAGAGAAGAAGCACCAAAAA	chr16	+	348483	TGG
ATTATATAGGAGATAAAAGA	chr4	-	415078	AGG
CTCCATGATTCCTTACTCGT	chr7	-	1043330	AGG
ACAGCTCAGGTGACATCTAG	chr4	-	1289225	GGG
TACGCTACGGAGAAATTCTC	chr8	-	521993	GGG
GGAATGCAAAAAGAAGACCC	chr16	+	621215	AGG
CTATTAAAAACATGTCTGAC	chr8	-	16157	TGG
CGGAAGGGTATTTCTACAGG	chr11	+	125453	TGG
GACGAAACTAACTAAAGTGT	chr16	-	118146	AGG
AGTCAAAAGAGGAAGCTCGG	chr5	+	545302	TGG
GTAGCTTGACATCTCTAAAG	chr11	-	649765	AGG
TGCATCGACAAGTAGCTGGG	chr12	-	1032161	CGG
AACCCTGAAATTTGTGAATC	chr5	+	228205	TGG
GTATCAACTTATGACTGCTC	chr4	+	693303	AGG
TGTACTCAATTCGGACTGAA	chr2	-	242778	TGG
ACATGAAGATGTGACCAATG	chr12	+	603209	AGG
TATACGTATACAATTGTTGT	chr15	-	101108	TGG
CCCCCTCTAATATCAACAGC	chr15	+	842048	TGG
AAATCTAGGGACAATAGTAT	chr12	-	48740	GGG
TATGAGTTTAATGGTGAAAC	chr11	-	417786	AGG
AAACGTAATACGTAGAAGAA	chr7	+	366352	TGG
ATATATGTATATATCTAGTG	chr5	+	162513	AGG
TAAAATTTATAGGAGCAGGT	chr2	+	337197	TGG
GAAATAAAGGATAAAAACCG	chr7	-	276798	CGG
TAAGTCATCATCAATGCTAA	chr14	+	498739	GGG
AATCACACAGAACATCACAG	chr8	-	129187	AGG
CGAGTCGAATCCAAGTTCTG	chr11	+	299047	AGG
GTTAAATTTATCGCAAAAAA	chr4	-	794124	GGG
TTCGGAATAACAAGCTTCAA	chr16	-	623438	GGG
ATGGAACACTCCTCACCACG	chr3	-	127534	AGG
CAAAAGCGACACGTCGTCTG	chr4	-	867901	AGG
AAAAGAGAAGATAGTAGAAA	chr12	+	823557	AGG
GCTTCCATAAGTCTTGGCAC	chr14	+	60249	TGG
AAGAAATCCCAAGGACTGGG	chr5	-	484173	AGG
GTTGTGTGCTTTTTGCATTT	chr11	+	421164	TGG
TATTCCTCACGATCTGACGA	chr15	+	683343	CGG
AAGCAGCTGAGATATAGTGA	chr16	-	739799	AGG
GCCAGAATCAGATATTTAAT	chr10	+	335703	TGG
TTTTGCCACTATAGTTTTAA	chr13	-	448168	AGG
TATAGATATAGATATATGTA	chr13	-	815595	TGG
TTCTATGTTCGCTTAATTAC	chr1	-	39150	GGG
GGTGTCATCGATAGTAACAG	chr11	+	558579	CGG
TCGTATAAGGGATTGCATCG	chr11	+	171778	CGG
GTAGAACATCGAGAAAGGAG	chr4	-	1054773	AGG
TAAGCCATCACCTGGCCAGT	chr10	+	380903	TGG
AGGTTGAAGATATAAATGCC	chr9	-	243828	TGG
AAAGTTACCTTATTATGTAG	chr11	-	182699	AGG
TTTGGTAGTAGGGATCGGAA	chr4	+	1278972	AGG
TGGCAGCAATGGTCATCAGC	chr5	-	228708	GGG
GTGTAGTGTGACAAAAGGTG	chr11	+	39032	CGG
TGGCTTATGCAGGCCTGACG	chr4	-	870738	TGG
GATGTGCATGTTGACAACGC	chr10	-	646582	AGG
TTGTTTGGTTGTAGGAAGCA	chr14	-	664068	AGG
TTAATAATTTATCGTACGGA	chr7	+	828977	CGG
TTTCTTTTCTTGTTCTATAC	chr8	-	170740	AGG
AAAGCCAGGAAGTTAGCGCC	chr4	+	1011503	GGG
ATGACCTAATTTATAGCTTA	chr3	-	96024	GGG
CAATCCTGCAGCCTGCACTC	chr11	+	533317	GGG
AATGTCCGAAAAGAACACGA	chr13	-	854653	CGG
ATAAAAGGTGGTGTGCATAC	chr4	-	405239	AGG
CAGAGTACAGTCAGTTCACA	chr9	-	378179	AGG
ACGGCATACCTCGACGAAAA	chr16	+	128393	AGG
TGATGAGATGTACGAGCTGA	chr16	-	704425	CGG
GGTGACACCACCACGAGAAC	chr15	+	648950	CGG
CTCCAAGCAAGCATCCGAAG	chr11	-	359454	AGG
GGAATTCTAAGCAATTGGGG	chr12	+	228465	CGG
GCAAGACAATATGACTACGA	chr3	+	246973	CGG
CGGCAAAAAATCTCCGCGAC	chr14	+	519108	GGG
TCGTTAGCAGCAAACGAAAG	chr1	+	57505	TGG
GTCCGTATACAATCGTTCAC	chr7	+	355813	AGG
GGTAAGCAAAGGATTGAGGA	chr1	+	36210	CGG
ACACGTGTCGAAGAAGAGTT	chr4	+	286936	TGG
TATCGGAAAATGGAGCACAA	chr16	+	157815	AGG
AAAGTATGAAAAGCTGGTCA	chr15	+	803770	GGG
ACAAAAAAGCATACACTCCA	chr12	+	156596	TGG
ATGTTCAACCATAAGCCATT	chr12	+	892909	AGG
CAATTGGCTAGAAGGATCCG	chr10	-	188201	TGG
TCTTTTTGTGCTGTTTTGTG	chr8	-	357600	AGG
CTTAAGAGGGAAGAAAGGCA	chr10	-	302662	AGG
GTTCACAGTTGAAAAAACAA	chr3	+	178832	CGG
AAAGCAACATAGTAACATAA	chr12	-	665520	AGG
TACATTAGCGTTAGAAAATC	chr15	+	755321	GGG
TATAACAGAAGTGAAACGCG	chr15	+	356154	GGG
ATACGTAGGAATATTACTCA	chr15	-	671594	AGG
GCAGACCCAAATATATGCAA	chr4	-	851139	AGG
AAACTTCTTTCATTAAATAA	chr5	+	110974	GGG
CAGATCATCGATAAGCATCC	chr8	-	26152	AGG
TTTCATCAGGAAAGAAGGAA	chr13	-	429679	GGG
GCTCTTTACGGCTCAAGGCT	chr10	-	177671	AGG
CACAAGACACGAAATCAAAA	chr8	+	383352	AGG
GTGACAGACAGCCTTTTCAG	chr12	-	159636	AGG
TTCGAAGGATTGCTAGATAG	chr10	-	503512	GGG
TATGATCAAGACATTTTTGA	chr4	+	967746	AGG
TATTCAATAAAGCATCGTCA	chr13	+	574750	TGG
ACGTATCAGCTCTAGAACCA	chr8	-	313984	TGG
TGAAAAAATAATTAATCCAA	chr12	-	541823	TGG
TATGTCTAATCCATGCCAGA	chr13	-	652866	AGG
CTGCTTTTGCTTTGCACTAT	chr2	-	71597	TGG
CGTGCTATTTCATCAAATCA	chr12	-	893469	CGG
AAAATCGCGCAGTAAAATTC	chr7	-	745600	CGG
GTGTTCATGTCACTTACGGT	chr13	-	632240	AGG
TAGCCCCAACAGCACAAAAG	chr13	+	556706	CGG
GGAGGCTGATCAAGAGACGG	chr15	-	309902	AGG
GCATCTAATAGAACAAAACC	chr4	+	142017	AGG
TGATTATGCAGGGTACTGCG	chr4	-	886870	TGG
TGATTAAACCTTGACAAAAA	chr11	+	248025	CGG
CCGAATGTATGGATGTTACA	chr4	+	1355880	GGG
TCCATTGTAAGTTTTTCTGA	chr13	+	297847	GGG
GTTTATCCGAGACGACGTGA	chr7	+	94895	GGG
AGATGAAGGCGTGGATGCTG	chr10	-	268806	TGG
TTTACAAAGAAACCCCCGCG	chr11	-	581037	GGG
AAAAAAGCAGGGTTTCAAGT	chr13	-	716674	AGG
ACGCAATGCAGTATATATAA	chr5	+	264161	AGG
TTCGACTTCGAGGTGGTCGA	chr10	+	99812	AGG
AATTTCATAAGTGACGTATA	chr10	+	637667	AGG
CTATCTCTTTGAAAATCAAC	chr16	-	404842	AGG
ACGTAGTGTCACTGGGAGCA	chr14	+	182517	CGG
TTTAACGTATGCCTCCATCA	chr10	+	41463	CGG
TTGCAAAAATTCATGGTTTA	chr11	-	272617	TGG
TGGATGAACAAATGAAAACA	chr5	+	330482	AGG
TTATGTGCTGGAGAAATCAG	chr4	-	282209	AGG
TGGTACAATCCCCGCAAGAT	chr4	-	303138	AGG
CAGCACATTGATAATAGCAT	chr14	+	286275	AGG
ATTTGCAGGTGTATTGCTGA	chr1	+	135546	GGG
CGGAAAGAGGAGATCCTGTG	chr4	+	1055160	AGG
TCTTCGGAATTGAAACGGAT	chr12	-	136449	AGG
ATAATTTCATTTCGCGGCGA	chr7	-	1043176	TGG
AGGTAAAGGAAAAAGATGGT	chr14	+	392820	AGG
AAAATTCACCCTCCTCCCCA	chr5	-	337538	CGG
TTCACTTGCTGACAAGATTG	chr16	+	878464	TGG
TAAGCCTTTACCAAACGGAT	chr16	+	493669	GGG
TGGAAGGAGCAATCAAAGGG	chr16	-	339611	CGG
TTTTTATGGGATGCAAGGGG	chr5	+	146654	AGG
TGCACCATTGTTTGCTCTTG	chr10	-	637775	TGG
TTCTTTTTTAACTTTTTGAA	chr7	-	359336	TGG
TCTTTTCACTCTATGAAACG	chr15	+	933606	AGG
AAAGCCTGATTGCCAAACCA	chr15	+	233999	TGG
TTTATCACTAAATAGCTACC	chr7	+	500018	CGG
TACCCCGCGTGCTAAAAAAG	chr11	-	92047	GGG
TTTTCCTGTTCGTAAATGAA	chr2	-	620717	TGG
TCAGGTATCGTACATCTGCT	chr14	+	595044	TGG
GTGTACAATAATAGCTTGGG	chr4	+	960159	TGG
TCCCATATCTGCGTACACTG	chr14	+	706331	TGG
TTGTTAGTTTAAGGAACAAA	chr7	+	391850	TGG
GAAAGGCGGTAGCGATGCGA	chr11	-	189153	TGG
TCAATAAGGACACTACGTAG	chr15	-	511251	CGG
TGTGTGCAAGCTTTTCAGAG	chr6	+	183043	TGG
TAATTTCCACCAGAAACAGG	chr5	+	171663	TGG
CTTGTTTAAGACCACAACTG	chr12	-	323257	TGG
CCTAGCTGTGGTAGTATTTC	chr15	+	994784	AGG
TGATGTGTGGACATTCTCCA	chr11	+	185622	TGG
TCCTCATGGGTTTACCAAAG	chr8	+	370121	AGG
CTTAGGCAATTTAATTCGAT	chr15	-	337679	AGG
GGTATATTATCAGTATGAGC	chr5	-	110987	CGG
TGCAACTTTTCAATGCTCAT	chr2	-	227462	CGG
AGATACGCAGAATGATGACT	chr16	+	710110	AGG
GAGAAAGGAAGCTCAAAGTT	chr4	-	802468	GGG
GAAAGCTACTGAGCAATCGG	chr11	-	499593	CGG
GGACCAGACGTAGCGAACAA	chr7	-	643695	TGG
TGGGCATCATTTAAATAAGC	chr15	+	908304	GGG
TGCAAGCTAAGCCTATCAGA	chr11	-	158313	AGG
ATACACCTTATAGATCGATC	chr5	-	451500	AGG
GAAATTGCGTGCATCGTTAC	chr15	-	602685	AGG
CTAATATTAGCCAACACAAG	chr14	-	510493	GGG
GGTCTATTTAGCTTTATGAA	chr12	-	363911	AGG
AGACGCAGTCAATGATAACA	chr13	-	465007	AGG
TTTGAAAATGTTAATGGGAG	chr4	+	548597	TGG
ATTTCTATATTTTTAAGATT	chr2	-	612119	TGG
CGATCTGTCTACTTGACTGG	chr2	+	183976	TGG
TTTACATTGCCTTTTCCCAA	chr3	+	41210	AGG
TGTAAAGATGGTATATTCAG	chr16	+	511695	CGG
AATCGCCAAGTTCTAGAACA	chr16	-	679254	AGG
CACAGAAGCATGTCAACGTT	chr7	+	226410	TGG
AAACGCATATTTTTGTTGCC	chr12	-	234620	TGG
ACCGAAAGATCTTCTCTATG	chr2	-	281380	GGG
CACATATTCTGCATATAGAA	chr7	-	165106	AGG
TTACTACTATTAACAACTGA	chr14	+	546330	TGG
AATAGTAGATTATGAACAGG	chr14	+	292985	AGG
TTTTACTTATCAAAAACGCA	chr16	-	610366	AGG
GCAGCTGTGATAATGACGAA	chr7	-	452380	TGG
CTGCAGACACATTTATCCAG	chr15	-	22178	GGG
ACGAAGAATCGACTCTCGCC	chr13	+	851789	GGG
ATGGAGGTCTAAGCATCCAG	chr7	-	902618	AGG
ATATGAGTTATTGACAATCC	chr15	-	949652	GGG
AACATTATTATATAAAACAA	chr16	+	218631	TGG
TTGTTATACACAACGCGTCT	chr10	+	436585	TGG
TTTTACAAATGATTTGGACC	chr16	+	280431	GGG
CGTGATTGATAGAAGGCAAA	chr15	-	394697	AGG
AAATGATGAGACTGACAACG	chr4	+	227036	AGG
TAATTAATGTATTTAAGCAT	chr12	-	537036	AGG
CCTTGAGGAAGAGCGTCTGG	chr16	-	44607	AGG
GCAGAACTGGAAGAAGATTG	chr2	-	365989	GGG
CTTCCGTCATCATATCCAGT	chr14	-	169709	AGG
ATAAATACAAGATTCGAAAA	chr2	-	36642	AGG
TAGAAGATGAGTGAACAGAA	chr7	+	1060628	GGG
CAGAGAGCATAGGCGATGTG	chr1	+	135881	GGG
AAACCAACCAGAATAACACC	chr2	+	796911	AGG
TAAGGAGATAAAGGGTGAAC	chr15	-	111811	TGG
GGGTAAAATTAAAAAGATTG	chr4	+	980954	AGG
GGTGGCGTGGAAGACGAAGA	chr8	-	341797	AGG
ATCTAAATCAACTTTAACGA	chr11	+	437207	TGG
AAGAATTCAATTGAGCAGTG	chr14	+	172655	GGG
GCGACCGCGATGAAGCGTAC	chr8	-	21436	TGG
GCTTTGATCAAGTTCATTGG	chr11	-	233812	TGG
GTTGTAAAATCATACTCGAA	chr3	+	127649	GGG
GTTAATGAAATGTATGTTGA	chr13	+	289641	AGG
CAGTGCCATTAGAAAGACGG	chr11	-	573068	TGG
ACGTTCCGGTGGTCACAGTG	chr8	+	218134	CGG
ATGCTCCAGTTATTTCAATT	chr2	+	367205	GGG
CAACGGTACAATATTACGAG	chr12	-	714715	GGG
TACAACGATAATAAAAGGAT	chr12	+	604146	AGG
ACTTCAGTTAATGGTCAGCT	chr4	-	933470	GGG
TCAACTGGATACAAAGCCTA	chr2	-	145988	GGG
GATAAAAGGAAGTATTATAT	chr4	-	1112333	CGG
ACAATCTCTTTGCAAATGTG	chr14	-	65025	GGG
AGAGTTTATAGCCAGGATCA	chr11	+	22485	AGG
ATTTTCAATTTAAGCGGAGT	chr8	+	35266	CGG
GAACATGCAGAATTTCGCTT	chr7	-	22110	TGG
TTAATTGTGAGTGTGTAACG	chr12	-	680171	GGG
TATTCCTTAAAAGACCTGAT	chr4	+	501285	AGG
TACGAAGAATTGGCTTCTCT	chr16	-	350372	AGG
GTAGAGGCAGAGCTTATAGA	chr10	-	272387	AGG
AAGCAATCAGTAGCAAAATA	chr16	+	627207	TGG
AAAAGAAAAAATCTGCACAA	chr16	+	593229	AGG
AAGGGAGTAAATTAGAATGG	chr4	-	473842	AGG
ATTGAATGTCCATAGTATCT	chr7	-	217352	AGG
AATTAGTTTCTTCCCGAAAG	chr10	-	246219	AGG
GTAATCGTGTGTAATGATAA	chr4	-	1127697	GGG
AGAACAGTAACATTTTTGAT	chr16	-	193541	GGG
CAAAGGTAGATTCTTTGGGA	chr7	-	650512	AGG
CGATATGAGAGCTAGCAGAC	chr6	-	95566	GGG
CACTTATCGTTTCTGATAAG	chr1	-	73821	AGG
CGCAGAATCCAACTGGAATG	chr7	+	1046414	AGG
TGTCTTATATAATAAACCCA	chr2	+	741363	CGG
AGTGTTATTGATGTTAGCAA	chr10	-	458705	GGG
TTTTCTCTATCCTGCGTGGG	chr10	-	570757	AGG
TCAAGAGAACAATTCAAAAG	chr4	+	183242	AGG
GAAATAAAAAATCACTGTCA	chr12	-	198630	GGG
TATACCGGCCGGCCGCATCG	chr4	-	1052374	GGG
AAAAAATCGTAAGAAACGAA	chr8	+	374535	AGG
TATTTTTTCACAACTTCGCA	chr10	+	540583	TGG
ATGCTCGTATGTAGAAGAAG	chr7	-	374713	CGG
AGGCTTACAATGTGTAACCA	chr15	+	391314	AGG
AAAAAATTGGACTAAAGACG	chr12	-	66873	AGG
TATCTTGTTGGCTTAGTAGA	chr15	+	900258	AGG
CTGTCTAATATGAAATTTGA	chr5	-	563437	TGG
ACAAACTTTATATGTGCTAA	chr16	+	874754	TGG
AGATGAATCTTTATTCAACA	chr10	+	528275	GGG
TTGCTAAAGCATACATCAAA	chr10	-	254492	TGG
ACAGTCAAAGCAATTGATGG	chr4	+	1414278	TGG
TTTAATATGGAAGCAGCAAG	chr2	+	730344	CGG
TGAGAAACAGAAAGCAAGCA	chr16	+	393927	AGG
GTAGTGCCCTCTTGGGCTAG	chr5	-	431349	CGG
ATAAGGTTAAGAATATCATG	chr5	+	131315	GGG
TATGATCCAAAATTTGCCAG	chr11	-	335431	TGG
TGAATATGAGATGATAAACG	chr15	-	770533	AGG
AAGATAGAGTTGTAAGATGG	chr12	-	1041360	TGG
CTGTGAAACTATATAAGTGG	chr9	+	386518	AGG
ACCCGGGCGACCAATCAGCG	chr2	-	36537	CGG
ATTTTTCAATTGTTTAGTAG	chr12	-	278697	AGG
CTAAAACCGTATACAGACTA	chr11	-	67817	CGG
ACATATGGCTTGTTATGGTT	chr8	+	238683	CGG
ATAAACATTTAGATATGAAT	chr4	+	31888	AGG
CGAATTCTCTCACTTGAGAG	chr15	-	784686	AGG
GTTTCATATCTGTAGACTGA	chr11	+	31025	TGG
AAGAACAGTGAAGAGTCTAA	chr16	+	301601	AGG
TCTTCGCCAGCGCGAGAAGG	chr13	-	129650	GGG
CGTTTGACTTCACGTCCATG	chr7	-	875306	GGG
TTTAGGGATGTCCTAGAAAG	chr16	+	814417	AGG
CCCTTAATACAGATTCGCGC	chr13	+	574959	AGG
GATGCTGGACAGGTGCCAAA	chr10	+	151878	CGG
GCGGTTAGCAAACTTCCAAA	chr10	+	448822	AGG
TGAGTTGATTGCTTCCAAGA	chr7	-	637166	AGG
CAAAATAATTGAAAAATGGA	chr15	+	413857	CGG
TAGAACTAGTAGGTATATGA	chr2	+	315298	TGG
AAAGGGCAAACTTATATAAG	chr12	-	54044	GGG
ATTAGGTAAATAGAGCTGGG	chr14	+	593089	AGG
TTGAGCCAAACGCATGCGCA	chr2	+	609648	CGG
CTGAATATCGGCTGAGCTTG	chr10	-	457668	AGG
TTATATAATAAGTGGCAACT	chr8	-	133098	TGG
TAGATTAATATGTAGTTGTA	chr4	-	352422	CGG
CACAAGTAATGAGCTAAAAA	chr4	-	1226796	AGG
TGTTCGGATGTGAAGTCCAA	chr14	-	190808	TGG
TAGTGTGCGACGTTATCTGT	chr2	+	117265	GGG
TGTGTAATGATATATGGTTG	chr7	-	306412	AGG
GCTATAGTAAATTCATTACT	chr5	+	94197	AGG
CTCTCTGGCGATGAGCTAGG	chr4	-	927760	GGG
GGTGCTTTAGATGATTTCAG	chr7	-	437272	TGG
CTTTATAACTCATTCTACCA	chr5	+	377622	CGG
TATATATCTGTAGATCTAGA	chr4	-	397216	TGG
TATCTCTTTTTTATAGAGTT	chr4	+	1494370	CGG
AGGGCGAAGAAGCAGAATGC	chr12	-	929667	TGG
TAAGAAAATAAAATCTCTCA	chr9	+	149146	GGG
ATTGTTGAGAAAACCAACTA	chr4	-	417232	CGG
TATAAGAAGGACGAGCGTGG	chr3	+	211844	TGG
TGTGATGTAAATGCAGAAGT	chr15	-	193623	AGG
GGAGAGGTGTCCTTCTCCCA	chr13	-	337401	CGG
AATTCCAATATCGTAAGCGT	chr5	+	303222	GGG
AAAATGGACGAAATAAAGAG	chr9	+	89057	AGG
CGTTTCAAAACTGTCCACGT	chr4	-	321891	AGG
ATACGAGCCACCTGCGACTT	chr10	-	434558	GGG
GGCGACTACTATATTTCTAT	chr5	+	15814	AGG
TTGACGTTAGTAAGTCACTG	chr5	-	377680	AGG
ATCACCTGCTAATGCGGACA	chr5	+	73233	CGG
TTGCGCAGGGGGTTGCATGG	chr14	+	355378	GGG
TGTCAGGATGGAATAGCACG	chr2	-	181598	GGG
GGCTTCCAAAGCCCTATTGG	chr7	-	951357	AGG
CATTCTAGAAAGAAAGCACA	chr1	-	141765	CGG
GACATCGACATGGTGCAATC	chr7	+	91058	CGG
AAACGTGAGCACGAGACGGG	chr9	+	151674	AGG
TAATAATACATCCAGAAAGT	chr12	+	929415	GGG
TCAAGGACACCGGATCATGG	chr13	+	401335	TGG
AGGTCAATTTTGTGACGAAG	chr5	+	44897	TGG
AACTTGTTCACCGATCTAGG	chr8	+	180099	TGG
ACGGTGATTGAAAAGTATCG	chr4	-	164445	AGG
GCACAGGGCAAAGAGAATGT	chr15	+	680876	GGG
TTATAACAAGCACCGCGCAG	chr6	+	224966	GGG
CATTTTGAACGTTCGCGAAA	chr7	-	729851	TGG
ATAACGCTCTTTTAACTGTG	chr15	-	954382	TGG
ACGAAAAAAGGGTAACTCTT	chr4	+	1222592	CGG
CTGAAAAGCCCAAATAAGGC	chr14	+	197854	GGG
AAATAAAAAAGATAAAATTC	chr16	+	69244	AGG
ATTGTATAAATGAGATACTT	chr2	+	407559	TGG
GACAAAGAACTCTGTGATAG	chr4	-	1236246	TGG
ATTGTGCAGTGTAGGATCCG	chr2	+	47448	GGG
GTAATCTAAGCGACTGACTA	chr16	-	102736	GGG
CGAAAAAGGGGAAAGTGATG	chr10	-	392276	AGG
GAGACTAAGTTGTAAAACTG	chr10	-	455986	TGG
GGAGGTCCCTTGACCTGGGA	chr15	+	757543	AGG
CACAAAAAAGCTACTAACAA	chr8	-	210505	AGG
AAGAGTGACATCATAATTAG	chr12	-	449793	GGG
TTCAGAGAGTACCATCATCC	chr7	-	855066	CGG
ACGTATACTGCCTTCTCAGA	chr9	-	333551	CGG
TTGGTAAACTCCAATAGTGA	chr14	-	259433	CGG
ATGATAAGAGGTGAAAGATG	chr9	+	199553	TGG
CGGGCGCACATATATACAGA	chr16	+	556416	AGG
TCACAACTAATACCCAGCCA	chr7	+	577001	AGG
ACAACTCTTTTATTAAGTAA	chr16	-	267693	GGG
TTTCAAGTCTTAGACTCAGC	chr15	-	126972	TGG
ATCATTGTTACAGGAACACC	chr4	-	163993	AGG
AGCATAACTAAAGTTGTAAA	chr12	+	866849	AGG
CGGCTTCGGACTCTTTTACG	chr5	-	377883	AGG
TCTTAGGGCTCAGAACCTGC	chr1	+	141949	AGG
GAAAGAGCATTCAAGGACTT	chr2	-	423792	AGG
ATAATAACAAAACACAATAA	chr4	-	1181405	GGG
TCGAAAGCAGGGGATAACAG	chr14	+	273813	CGG
TGGTTGAAGAGATCAAAGAG	chr14	-	146870	AGG
TGTATTGGAAATCGTGATGT	chr15	+	644664	TGG
TATTACTTCGAAAGCGCAGT	chr11	+	158174	GGG
TTCGCCCTCCAGCTTGAAAG	chr10	+	378643	GGG
CAAGCGAAGTAAAATAAGAA	chr16	-	383254	AGG
ACCATCAAAGAAGGTTAATG	chr5	+	115921	TGG
ACCCCCTTACGGCTGCGCAA	chr8	+	66042	AGG
TGGCTGTCAGAAACGAAATG	chr16	+	588805	TGG
CATATATTGTAGTATACAGA	chr4	-	769997	AGG
CTGCCTGGGATAGAGCTCAA	chr5	+	415543	AGG
TTATTGAAAGAATCTTCTAT	chr4	-	954096	AGG
CCTTATTGTAAATTCCTCAA	chr13	+	263452	CGG
GCTAATCAAGTATGGCATGC	chr3	+	38684	TGG
TCTCAATATTAATCGCAAAG	chr12	-	543564	TGG
GATTCACAGTATTAATTTTT	chr11	+	653076	AGG
TTTATCAATGGAAAAGTACG	chr10	+	272673	CGG
AACATCTTGGGATTGACGCA	chr8	+	150314	AGG
TGTTTGTTACCTTAACGAAG	chr15	+	644457	AGG
TTTCCGGGTAAAGAACGCGT	chr2	-	62797	GGG
TTTCACTACTGTTGCATCGA	chr13	+	856568	AGG
CTATTCGACAAGAAGGGTCA	chr7	+	306616	AGG
AACTCGGTTTAACGCATAGT	chr5	+	225835	TGG
GGTTAAAAAGGATGTATGGA	chr10	-	607996	TGG
AAGGACCGGGTATACAGTAG	chr3	-	24816	TGG
CGGAGACATGCGTTTAGATG	chr1	-	9158	AGG
CAGACGGTAGTATTGATGGT	chr15	+	194656	AGG
GAAGACATGAAAAGAATCGT	chr15	+	849736	TGG
GTATGACACACTAGACGCGT	chr16	+	96344	CGG
TGCGGGTATTATGGACCATG	chr12	+	857265	AGG
ATTCATAATAATGCTAACGT	chr7	-	932206	AGG
GTTAACGCGTGAAAAGTGGG	chr8	-	402766	CGG
CTTACCTTTCTTTAACAAGG	chr4	-	1297957	AGG
CATTTTTGCGAAAGAGGACA	chr4	-	1072479	CGG
GTGAATTGGTTTGTTTTGGT	chr14	+	383745	AGG
ATGAGATGTTAAAAAATGGA	chr11	+	182757	CGG
TACGTAATCTTTCGAAAGCT	chr10	-	140441	TGG
ACCTAGTAATAATTTAACCT	chr7	-	687483	AGG
GGTCCAGACATCTCTCCAAA	chr14	+	222782	TGG
TATTCAGGGATACTGAACAC	chr12	+	1025079	CGG
GACCCCTTAAAATTACTGAG	chr9	+	155062	GGG
GAAACTCCTTCGAAAACAGG	chr7	-	508548	GGG
TCAGTCAGGCAAAAAACGCC	chr13	-	513455	GGG
GAAGAAGACACACAAACTGA	chr16	+	99975	GGG
TGTTTTGAAGAGCACCCAAA	chr12	+	603585	GGG
TGTTTATACTTTAGAAAAAA	chr12	+	845956	AGG
CTCATATTGCTTCCAAAAAA	chr4	-	337469	TGG
TATTTGCTTCTTATGCGATG	chr7	+	362001	AGG
GGTACACGACCAACAAAAAA	chr2	+	304838	GGG
TCATGCTGATAAATGGAAGG	chr5	-	337672	GGG
TATGTATGTACTTTTCATTT	chr14	+	185326	TGG
AAAAAGAAAGCTTGCTGGCT	chr11	-	19883	TGG
CTAAGAAGCAGCTTCGTCGT	chr7	+	584024	TGG
ACACAGACAAAACACACGAC	chr7	-	452415	CGG
GTAAACGGTTCCCTTCCGCA	chr13	+	387155	CGG
TCGTACTTTTGTAAATTCGG	chr12	+	407982	AGG
AATTATATGTGATAAAAGTC	chr16	-	271009	GGG
CGGATTAGATTATTTGATGT	chr16	-	887711	TGG
GTGCCCTAAAAATAAAGTTA	chr13	+	209227	GGG
TCAAGCATTGCTGTAAATCG	chr16	-	557481	AGG
GGTATGTTAATATGGACTAA	chr13	+	225911	AGG
CAGATCCAGATTATCGATAA	chr2	-	745006	TGG
ATTGTTATCTTTATCAAAGA	chr2	+	458308	GGG
ACTAGCAGATCACAGTGCTT	chr15	-	579797	AGG
TGAGATGAGATCCAAATGGG	chr4	+	56625	AGG
TCAATCTGCAAGTACTTAAG	chr3	+	176594	GGG
CATTATTATTGATTTATCCA	chr6	+	162204	AGG
TAATTAGTACCTATTATCAC	chr5	-	156262	AGG
TTTTTGGTTGAATCAACAGT	chr8	-	242350	TGG
ATAATTTGAAAAAACACCCG	chr1	-	151866	AGG
CGCTCATATGACAAGATATA	chr7	-	317122	AGG
CGATTAAAGAAGGCCCGGAA	chr2	+	315445	GGG
TTTTGTGTTTGGACGACCAG	chr14	-	400640	TGG
TCTAAAGCATCACTCAGAAG	chr12	+	660658	TGG
GATATTACTTTTCACCCATG	chr13	-	653000	GGG
AAAATTACTCATCGAGAGAG	chr14	-	559625	GGG
AACATCATGAATAATAGGGA	chr7	+	308829	AGG
ATGATCTTTACCTCGCCACG	chr8	-	129374	CGG
AATGAAGAAAATGAGAGATA	chr7	+	856565	AGG
GGTTGGTGCAGAAAGGCCCT	chr7	+	643658	TGG
ATGTTATAGTATTAGTTGCT	chr8	-	451295	TGG
ATGTGCACTTATTATCAGGG	chr4	-	375533	AGG
ACTTTTCTTTCTCAAGACCT	chr13	+	751463	AGG
TATCATATGTTACGGAAAAG	chr2	-	186616	TGG
TATATAAATCTAGAAACTCA	chr9	-	244702	CGG
ACGAAGTATAAACGAAAGCA	chr2	-	625133	CGG
TTTAAATATTGAGTCTACGG	chr16	+	681805	CGG
AGGATCAAACAAAAATGAAA	chr15	-	584096	AGG
AAATACCATAATATGTTACG	chr13	-	577536	CGG
TTACTGCTCCAACTGTCAGT	chr15	-	401659	AGG
CATCTCTATCAACAAAATTT	chr16	-	319088	CGG
TGTAAAGAACAGTTTACACT	chr10	-	116818	TGG
GTGAACATATTCAGAGGCTG	chr5	-	258387	AGG
TACTGCATAAATTACACAGT	chr13	-	562820	AGG
TTTAACTCGTTTAAACATTA	chr13	-	603239	GGG
ATTATTTAAAGTTCACAGAG	chr1	+	138714	TGG
AATTGGTTAAGGAGGACTGG	chr9	+	40033	AGG
CCTGTGTAATAAATAAAATG	chr11	+	88416	AGG
TAATTAGTTTCATCTAATCC	chr2	-	691829	GGG
TAGTTAGAGTAGAAAAAATG	chr7	+	48517	CGG
GATCTTGTGAAGTTTTGCAT	chr12	-	934442	GGG
TGACTGACAACAGATATGTG	chr16	+	792747	GGG
CGTATGAGTTGTTAAGAGAA	chr4	-	829542	TGG
GCTATTAGAATACACTTGAC	chr7	+	202439	AGG
TAATAAATTACAAAAACTAT	chr4	-	1427102	TGG
TCCTTTGAAGACAAGCACCG	chr3	-	104684	AGG
GTATTGGTCCATTATTGGTG	chr10	+	141601	TGG
ATACTGGCCGCTTCGAAGAG	chr16	+	30416	TGG
AAAAAAGAGAGAAAAATAAG	chr15	-	909188	CGG
GGTTGTATATTTGAGCGTCT	chr15	-	421811	CGG
GGCCTCTGCAAATAAGAAAG	chr9	+	122353	AGG
TTACTTTCAATTTTTTATCG	chr11	-	168975	AGG
TCGACATCAAGTACCTTTTT	chr8	-	242156	TGG
CATTGGCTACATTTGCAAGA	chr12	-	158038	AGG
AATAAAAGATGATAATCGTA	chr4	-	78516	TGG
TTCATAGAGCAAAGAGTTAA	chr11	-	357863	CGG
ATCTGTTCCTAATATTCTCG	chr7	+	38879	AGG
ATGGAAGGAGCTGTTACACA	chr4	+	132170	TGG
ATTTTTCAGATCGCGCACGA	chr10	+	513934	CGG
CGCAACAAGAAGAAACACGC	chr14	+	707443	AGG
TAATTCCAAATTAGATTCAT	chr14	-	470973	CGG
GTAGGAAGGAAATTTCGTAT	chr16	+	164308	TGG
TGTTTTAAGCGATAGAAGCT	chr15	-	894378	TGG
CGATAAAACCTAATGTTGGA	chr7	+	1043243	AGG
TGATATGTCATATTCTCGAT	chr12	-	441444	TGG
ATACTATCACTTATACCGAG	chr13	+	243967	AGG
AGTTGATTACCTTTCACCAG	chr2	+	146160	AGG
GAACAAAATAAACAAAATAC	chr8	-	354478	AGG
CGAAAATGAGGCGATAAACG	chr2	+	245943	AGG
CCCATCGACTGCCCTTACAG	chr10	+	36482	TGG
AAGAGTGCGCGGTATACGTG	chr12	+	877984	CGG
GCCTCCCCAAGCTCTTGGAG	chr14	-	118721	CGG
TTTTATTATGAATGAAGTAA	chr15	-	853017	AGG
TGGCCAAAACAAATTCATAA	chr10	-	239409	GGG
AAAAGGGAAGACGTTGAGAG	chr13	+	44118	AGG
AGTGTTCATATGTGTAGCGT	chr11	-	236667	AGG
GGCAAGAATAAACTGGCTTC	chr2	-	40523	AGG
CCTTAGGATCACACAATTCA	chr13	+	715318	TGG
AAAAATGACGACTGTAACAT	chr2	+	761158	TGG
TCGAAGGTTCCACCATAAAC	chr2	-	311909	GGG
GTTGCTTAATATAAAGGCAA	chr2	-	718376	AGG
TGGATATCCGGCTCTAATAG	chr11	-	583211	AGG
TTCATATTATTTCAACTCTT	chr15	+	1017848	TGG
TCATTCTGTTCTATCGCAAA	chr15	-	335716	CGG
GTTGATCAATGAATTAGGTG	chr10	+	324578	TGG
GAAACTAATGCTAGTAAAGA	chr5	+	342310	TGG
CGGCATATGGTGTTTCCTTG	chr4	+	1359686	CGG
AATGTTGTAGGCTTGGCCAT	chr13	+	904685	CGG
GAACGTTCGAAAGCGTAGAG	chr12	-	603304	TGG
TACTTTATTTATTTATACAC	chr7	+	511088	CGG
ATAAAACAGTCAGTTCTTGA	chr7	+	112365	TGG
ACAATGTAATCTATTTTTTC	chr13	+	733311	AGG
ATAACGAAATCATCTACAAA	chr7	+	951767	AGG
TGTAAGGGACTGCGCCAACG	chr15	-	619048	AGG
ACTACAAGGAAGGCTCCATG	chr15	-	611869	CGG
TAGCTAGTTTAATTGCATGA	chr11	-	133486	TGG
GATGAATCTGATTTTCAAAC	chr9	-	202613	TGG
AATGTGGCAACGAACTGCGG	chr9	+	386936	AGG
GGTGCAACAGGAATGTACGG	chr2	-	477216	AGG
ACGCGCTAAAATCTCAGCCA	chr4	+	979279	AGG
CTTCTTGCTGCAGCGATTGT	chr10	-	497486	AGG
ATAATGCAAATCTCCGCGCG	chr2	-	241551	GGG
AGTTAATTATTAACTATGAG	chr7	-	147975	CGG
CATTGCTGTTTAAATGAAAC	chr14	+	535056	TGG
GTGAGCTGTCCTAGTTCATG	chr12	+	301810	TGG
ATGTTTGTAACTTGCAATCG	chr15	+	194713	AGG
ATCTCTCTTCATGGCAATAG	chr16	+	821469	AGG
CGAAAGATAGCCATTTCCAG	chr12	+	198286	TGG
TTTCTTTTCTCGGATACAAG	chr9	-	202164	TGG
TTTCAGGGAGTCTGGTCGCG	chr12	-	660362	GGG
GGTAGAATAAGTCGATGATG	chr8	-	387162	TGG
GTGAATGTTGTGGGGAATGT	chr11	+	141191	TGG
GATAATTATGAGTGACAACT	chr13	+	247690	CGG
GAGGTATAAATCATACAGAA	chr11	-	589374	AGG
ATACCGTATATTTTTTGACG	chr15	-	181570	CGG
ACATAAAGGGGCGCCCTCAA	chr13	-	505029	AGG
GGTATATCTCTCGAATACTG	chr10	-	503416	CGG
CGACTTGTTGTCATTCGTTT	chr16	-	704562	TGG
AAGCTAAAAATTTGGCGATG	chr14	+	255169	AGG
TGACGATATCAAACCATACC	chr13	-	742630	TGG
ACAGTAACTTTGACTGAACA	chr11	-	477999	AGG
GTTACATATTTTCAATTCAA	chr13	-	814002	AGG
AAAACCAATAAAAAATGTTC	chr12	-	506047	TGG
TAGTGAGCCAATATTATACT	chr13	+	129751	AGG
TGGAGAGATGTGCTAGATGA	chr15	-	559980	TGG
ATCATAAATCAGTACGCAAA	chr14	+	478384	CGG
AAAATGGTAAAAAATGAACA	chr7	-	959852	AGG
ATTTGAACATATTATTGTAA	chr15	+	323313	GGG
AACATGACAGTCAACACTAT	chr8	-	219121	GGG
GGTGCATTTTAGCGTTTCTG	chr11	-	245682	AGG
GGGGAGTACCATTGGTGAAG	chr10	-	238911	TGG
AACAACGATGGTGGTCGTGG	chr7	-	806593	CGG
GGCATGTGGCTAATCAAGTA	chr3	+	38676	TGG
GCCCTTGAACACTAAGTTCA	chr12	-	862161	GGG
CAGCCTATCTCCACGCGAAG	chr4	+	483982	GGG
TGGAGGTGCTGAGAAAGCGG	chr13	-	654958	TGG
GCATCATATGTGCAGAAAAT	chr15	+	1001106	TGG
ATGACACCTAAAAAGGATTT	chr10	-	150722	AGG
ACTCGCTGCAACAACTGAGA	chr13	+	551826	GGG
CGAAAGCGTTTCCTCCACAG	chr7	+	678867	TGG
CTACGAATTGACCAACCGTG	chr13	-	502212	GGG
AGGTGCGTAGGCGAAAAACT	chr15	-	35910	TGG
AAGCATTGGAGCCGGCACAT	chr7	-	237970	TGG
GAAAAGATGTAAAGAGACGA	chr4	-	675702	AGG
GAATTAGTACACTCATTACA	chr9	-	175129	AGG
TGTTTCAACCATTGATTGCA	chr1	+	87166	GGG
ATTTAGTAATAAGAATTTTA	chr4	-	1014211	TGG
TCTGCAACTAGAGGCAGCGA	chr16	-	696734	CGG
CTTCGAAAGAACCGTGCAAG	chr14	-	488055	AGG
AAAGGTCAATGACGATGGCA	chr3	-	123705	GGG
TAAATCACGGAATTAAGAGA	chr8	-	204294	AGG
TAATAGGGACATATCCGCGC	chr13	-	79534	AGG
CTCAATTGAATGTTTCAGTC	chr5	+	167345	CGG
TGCCCTGGATGCTTTAAAGG	chr16	+	647771	AGG
GATTCTTTCTAACATCAAAG	chr4	+	1468637	AGG
GCAACAGCAGCAAGTTCCGA	chr16	+	165615	TGG
CGTATCTACTATAAGAATAA	chr10	+	643461	AGG
TATATAATATAGTCCGAGCG	chr7	-	413216	GGG
GTCATCAGCACAAAAATATG	chr11	+	7957	CGG
TTATTATGTAAAGTTAGTTC	chr3	-	147788	GGG
AAATTCATGAATTTTATTTA	chr12	+	432092	TGG
AAATTCTTCATCATCTAATA	chr16	-	267664	CGG
TTAGAGGACACTGATATACG	chr16	+	607686	AGG
AGATATGGATATGTATATGG	chr2	-	278432	TGG
TATCACGTGATAGTATAACC	chr7	-	397905	CGG
AAGAAAATTGATGCCTAAGG	chr15	-	383417	TGG
TGCTTTTCTTTTAGAAACTG	chr4	-	542241	TGG
CAGCAGTAAGAAGAGACCGA	chr14	-	357063	AGG
AGAAGCCAAAAGATAGGTTG	chr5	+	409172	AGG
ATGCAGTATTTTATCTCAAA	chr11	-	650251	CGG
AGATTTCTTGCTCCTTTACA	chr16	-	41150	GGG
TCAAGAGTACAACTAACTAA	chr13	+	131764	AGG
AAATCGCGTTGATTTCTGTA	chr15	-	364309	TGG
TCATACTTTTCATTTCCGGG	chr14	+	631405	CGG
GCAGAAGTTATATGATTTGG	chr15	+	234512	GGG
CTTAAATCAGTAGGATCGGG	chr10	-	79831	AGG
GAGATTACTGTATCTACATC	chr2	+	168334	GGG
ATTCCGAAACAGGTGACTGG	chr12	-	573586	AGG
ATTAACAGGTATTATATTAC	chr12	+	528120	TGG
AGGTTTGATGCAAGTTTGGT	chr8	-	465114	AGG
CTGCCACAAGAGTTTCCAGC	chr14	+	371625	AGG
AATATAACACCTGTAGAGAG	chr14	-	715796	CGG
CTTCCACCCTCTTACACAGT	chr16	+	921569	AGG
TTCCGTTGTCTCGAAGCGTG	chr13	-	556805	TGG
AGCGTTGTGAGCAATAATGT	chr11	-	340266	TGG
GAAGGAGCGCGTTCCCAATA	chr4	+	1251851	GGG
GCAATCGGTAGCATGCGCAA	chr8	+	123908	GGG
AGGTGAAAAAGCATCTTGGA	chr13	+	712281	AGG
GCATATTATGTAGAGTGTTA	chr7	-	140261	AGG
GCCCCTGGGTCAGAGAAAAT	chr4	-	1497778	AGG
CCTGTCAGTTTCAACCGAGG	chr4	+	556729	TGG
GCACGAAATTTTCGTACCAG	chr4	+	1149341	AGG
TGGGAGTTTTTCGTTGATAT	chr8	-	232137	CGG
GTTTATTTATGGGTGCCCGT	chr14	-	200432	CGG
TATTGACCATAGATCCGATG	chr9	-	193030	AGG
GCTGTAGTATCCTAACGTGA	chr4	+	1166607	AGG
TGTAAAAAATCAGACCAAGG	chr9	+	89959	AGG
CCGAGCGACAAAACGATTTG	chr14	-	694899	GGG
AGATCTTCTGCCAGAACTGA	chr9	-	193089	AGG
AATAGATTCTGATGAAGAGG	chr11	+	153630	AGG
CGCAGGAATTGAGTTTACAA	chr14	-	345930	AGG
TGTATTTTGGATGCTCTTGA	chr10	-	245515	TGG
AATAGCCCATTCTTGGACTG	chr4	+	212382	AGG
CATCCCTTTCTGCTATAGCA	chr3	-	157437	AGG
TAGTCTGTGGAAGAAAAAAC	chr8	+	267464	TGG
GATACATACGTATAAGCATA	chr5	+	128331	CGG
CTTCATTGCCAAAGTAAGAG	chr4	-	1075724	TGG
AAGTAGAATTCTGGTTATAG	chr2	+	206843	AGG
TGAATCAGTAGCTGTCTACA	chr7	+	74250	TGG
TATCACTAATAGAGCTTCTA	chr8	-	116170	TGG
ATACTAATGAAAATGCGTAC	chr16	+	475211	CGG
GGTACATTGCATATGAGCCA	chr7	+	330707	AGG
TTTATAGTTAATGATCACGA	chr2	+	237512	CGG
TGAAAAGTCGTTGAACAGCA	chr16	-	713077	AGG
ACAGTTGTATTTGGAAGCCA	chr11	+	618130	AGG
TGAAGTAAGCTAAGGCGACA	chr14	-	119110	GGG
CAAGAGTAAAAATAGTGATC	chr8	+	178154	AGG
CCTTCTTATGTATTAAACCT	chr9	+	222612	GGG
TGTAAAATTGTTGGACAGTG	chr11	-	482629	AGG
TCGTTAAAGTAACATTTACC	chr9	+	77449	CGG
ACCCTGATAGAAACTAGGCT	chr5	-	83044	CGG
GTATGTAGTTGCTCATCGAT	chr7	-	745662	GGG
GCAAAAATGATTCAAAGTAT	chr10	-	53014	TGG
TATTACGATGCATTGTGACG	chr16	-	672181	AGG
GTTACGGTCCTATAGTGTAG	chr4	-	645207	TGG
AGCTGTTAAGAAAGGTGTGG	chr3	-	120237	AGG
AGCGCTAATAGCAGTGCAAA	chr11	+	161674	AGG
TTATATAAGATGGGAAACGA	chr10	-	717600	AGG
CAGCTCTCAGTAAATCCTAC	chr8	+	222641	AGG
GTAAATATAAATCTATAAGT	chr13	+	22023	GGG
TTTCAAATCCAAATTGTAGG	chr10	-	76025	TGG
CGTCAAAAATAATTTGACAA	chr11	-	112500	TGG
TAATGGAGCACGTATCAAAG	chr14	+	542322	AGG
AATAGGCGTGCTTCAGCATA	chr7	+	377300	TGG
ATAATGTCATTCTGCATATA	chr7	-	805146	TGG
TTCAAAGCATTTTCATCGTT	chr7	+	532462	TGG
ACTATAATTATGGTTCATCG	chr16	+	205259	AGG
CTCACCAATGACATTACCAG	chr11	-	464896	CGG
GTTTCGAGACATCTTCTCAT	chr11	+	201376	CGG
TGACTGTGACGCTTGATACC	chr5	-	126291	AGG
GTAATCACATATCACATGCA	chr14	-	317901	GGG
ATGTATCGAGACTGAAAGTT	chr4	-	1020664	AGG
GTAACATACAGAACGAAGAG	chr2	-	578158	TGG
TTAGAGATGTGTCAAATCGA	chr11	-	118448	AGG
CATGATATATCATCACCCGG	chr2	-	80877	AGG
ACGTGAAGAATAAAATGAAG	chr16	+	348896	AGG
GAAATAGCAGTTAAATGTAC	chr12	+	202685	CGG
TGGTTTTTGAGGTGAAGTTG	chr5	+	167113	AGG
TTGTCAACTCTAACAACGAA	chr4	+	599143	AGG
TTTCTGCGGAAACAGTAGCG	chr4	-	1386826	TGG
TGTTTTATTGACTTTTGTCT	chr10	+	90748	TGG
CCAACTTAATCTTTCAGATT	chr16	-	729380	TGG
AACAACACGTCATTGTAACG	chr4	-	676111	CGG
CAGCTTTAACTTTTAAGAAA	chr4	+	368452	TGG
AAGGTGCAGTAAGCTTCCTG	chr9	-	75950	AGG
GCCAATATCCTGAATATGAG	chr14	-	635290	TGG
TATTAAACGTAGGATCGAGG	chr5	+	26207	CGG
CAATATAAGTGAGATTGTGT	chr15	-	153770	AGG
TGGATCATCACCAGTGACAA	chr11	-	374911	TGG
CTTATGTGATATAATGAGCA	chr9	-	403543	GGG
ATACTGATGCGATCTCTGGG	chr7	+	293193	AGG
CTTTATACATGTCATCAAAG	chr13	-	739906	AGG
ATTATTCAGCTTAGGAGGCG	chr12	+	899615	CGG
TACTGCGACGATGACGAAGG	chr4	-	593262	TGG
AAAAAACAACACTCACGATG	chr7	-	736398	GGG
TACAAGATATTAGGTATACA	chr5	-	249759	AGG
ATGAGATTGAAACAATAACA	chr10	+	636965	AGG
GAAAAGACGAAGAGCAGAAG	chr8	+	484808	CGG
CATTGGAAAATGTCTCGCGT	chr12	+	624214	TGG
AGTTATTTCAGAATCTGAAG	chr12	+	160080	AGG
TGTATACGTTTCAGAAAAGG	chr10	-	330229	GGG
AATGTAAATAGCCATAAAAA	chr10	+	424711	AGG
CTTCTGAAAAATCCTCCAAG	chr6	+	176721	GGG
ATAAAGCACCGGTAAGCGAT	chr11	-	603960	AGG
ATTTAACTATTTATAATCAG	chr9	-	384153	TGG
ACTCGTTTAATATTATTGAG	chr13	+	429968	TGG
AGCAAAAACACCATAACTCG	chr7	-	994195	TGG
ATTTACTAGAAGGATAATAA	chr2	-	435593	AGG
AAATTGTCAGTGCTTAGGAT	chr7	+	555639	GGG
AATAACACTCCCGAAGGAGA	chr16	+	673387	TGG
CGGGGCGGTAATCGGTGACC	chr14	-	356789	AGG
TGCAGCTTTTAACGAACATC	chr8	-	470785	AGG
ACATTGCGGCTATGCATCAC	chr16	+	586459	AGG
TCTTTCAGCTGGGTATCTTC	chr10	-	53347	TGG
AATTTCATATTGCATGATGA	chr16	-	534801	AGG
CAATTGAGAAACGTCACTCA	chr3	+	280102	GGG
ACTTCTGAACAGCCAGCAGA	chr10	+	497002	AGG
TTTTCAACAAGTGAATAAAC	chr10	-	53055	GGG
AGAGCTTACCATTTCTGAAA	chr7	-	131152	AGG
CGACGTCAATCAGATACATC	chr4	+	1093408	GGG
AAGAGTTTGGAAGAAAAGAG	chr2	+	662387	GGG
TGTCTTTCTTATTACTGGCA	chr4	-	903625	CGG
TTTTTCAGTTTTCCATGTTG	chr13	+	768215	GGG
GATTTGGTCGTTAAATGCGG	chr4	-	958712	CGG
TCTCTTCAATCTCTTTATGT	chr10	+	393656	GGG
AATAACCATAGCCAAGGCCA	chr11	+	364163	CGG
AATAAAAACTAAATACATGC	chr16	+	924228	AGG
CAACCCTTAGTAAAGAGCTG	chr5	+	242367	CGG
ACAAAGACCTGAAAATTGCA	chr16	+	360836	TGG
ATATTGTTCATGTCCAACGC	chr9	-	425511	CGG
TTGAATAACTTGGTTAGACA	chr2	-	47484	CGG
TGACAGTCAAGAGAACGAGG	chr11	-	122113	AGG
CCTTTTTTAAGAGATAAAGG	chr14	+	711208	GGG
ACCATATAAAATATACCATG	chr8	-	38543	TGG
CTATAAAAGAGAAGCCGTTG	chr1	-	39013	TGG
TCAATCATAGCTTTTAACGT	chr16	+	466863	CGG
AACAACAGTAGATGAGTACA	chr2	-	365745	AGG
ATTACAAACACTGAACGTGG	chr10	+	636619	CGG
CCGCCCGGAAATTAATGGGT	chr7	-	892489	AGG
ATGAACTGTCCATTTAACTA	chr10	+	442821	TGG
GCAAAACAAGTGTAAACAAT	chr9	-	117516	GGG
ATTTTCAATCTTTACATTGT	chr4	-	1030136	TGG
AAAGAGCAATGAATTTGCGG	chr2	-	561400	AGG
AACAAGGATGGGAACATGAA	chr1	+	180206	AGG
CTTTGTGTTTTTTCTTGATG	chr7	-	882679	CGG
ATAAAAGCTTTAAACGCGTT	chr11	+	226057	AGG
TCGATTAGACTATTCAGGCA	chr3	+	155901	TGG
GTCCAGTTTTATAGAAGACG	chr4	+	130581	AGG
TAAAGCTCAACTCCAAAGAA	chr2	+	292260	GGG
GAAAAACTGACGAAAAACGC	chr4	-	848258	TGG
TCAAATTTTTCAATATTCCG	chr13	+	21830	CGG
AAAGAATATACGCTTAGCAA	chr8	+	337964	AGG
ACACTAAAGAGTGAGATCAG	chr9	-	216368	CGG
TTTCTTGAAAGAAAAAACGA	chr14	-	252011	TGG
ATGTTCAACAACATCTCAAG	chr2	-	321731	AGG
ATATGTGCGAAATAATTATC	chr16	-	912766	GGG
CTTATATTATATGTTTCCAA	chr4	-	602755	GGG
CCGTTTGAGAACGACTGCCG	chr16	-	463803	AGG
TTCATATACTATCACCGACC	chr16	+	338810	TGG
AATAATACAAAATGATTCAA	chr8	-	429079	AGG
GGTACAATTTTAAGCAGTGC	chr7	+	314199	TGG
TGTCCTTGCAATATATCGCA	chr4	+	582925	CGG
ACTGGACTAAAAATCGATTG	chr12	+	721488	AGG
AATAAGGAGTAGCCAATCAT	chr11	+	604966	AGG
TAGCGTGATAAGCACGTGAA	chr12	+	902547	TGG
ACTTTTCGAAGGAAACAGAC	chr14	-	543187	AGG
TTTCACTTTTATTCTTTAGG	chr14	+	227252	CGG
AAGGAGTAGCCAATCATAGG	chr11	+	604969	AGG
CGTAACGATTTAATATCACG	chr13	+	701354	TGG
GTGTCATTATAGCATAAGAC	chr13	+	387228	AGG
TAGAGAGCATGTCTTGCTAG	chr11	-	278408	CGG
GTAATGCGAACCTCCAACGT	chr7	+	849305	TGG
TTCTAGGACTAGACAATTCG	chr13	+	545236	GGG
ATCATTAAACCAACCACCGA	chr10	-	678997	GGG
AGACAGTCAATCTGTCACAG	chr4	+	265272	AGG
TTAATTAGTAATAAAAAGAT	chr15	-	103795	CGG
TTATGATGGAACGTATCGAG	chr16	-	456976	AGG
AGAAAGGCCGATGTCGTAAG	chr16	-	758526	CGG
TAGCATGTACCTCTTTTGGT	chr4	-	808039	GGG
TTAGTGATAACGCGGTGAAG	chr4	-	831997	GGG
ATCTGCGCACATAATATAAG	chr11	+	13730	CGG
GAAATCTCAACCCTAAATTT	chr4	-	1518063	AGG
CCGAACATAGAAATATCGAA	chr3	-	139203	TGG
TATTCGTGGACGGACCATAC	chr7	+	694989	AGG
ATTAACACTCCCGGTTAACC	chr5	+	517667	CGG
GAGACACCAATTGAATGTAC	chr10	+	151959	AGG
AGCTCCGTTAACGCAAATGG	chr2	+	549794	AGG
CCAGAAATGATTAATTTCCA	chr10	-	642046	CGG
AGGAAGAAAAGAACCCAGAA	chr13	-	145995	GGG
TTCAAAACATCATCTAAAGT	chr4	+	426866	AGG
AGAAGGACATAATATAAACA	chr7	-	1019675	AGG
TTCTCGTGTCCCACGCATCC	chr12	+	573677	GGG
GAAAGAAAAATAAAACAAGA	chr4	-	521058	GGG
TTTACATTTATTTTATTTCC	chr9	+	270684	AGG
ATTCCGTGGACGATCAGATG	chr5	+	423112	CGG
AACGATCCTATCTGTCGCAA	chr4	+	1502587	CGG
TCCAAAACGTCTCCATAAGT	chr11	+	18328	GGG
GACTTTCACATCCACATTCG	chr13	-	912180	AGG
TGTTACTCCAGTATTATGGA	chr4	-	1403297	TGG
CGTTATTAATGTTATTGTCG	chr12	+	326484	TGG
AAATGATATAGCTACTTGGC	chr13	+	77785	AGG
GAGAAAACCTAGCCCAATTG	chr12	+	97610	CGG
CAACAAACTACAAGAAAAGA	chr16	+	794966	TGG
TAAAATGTGTGAATACAGCA	chr14	+	87913	AGG
AACGATTGCCAGTAATAGGG	chr11	-	649840	AGG
TGCCACAACAACGCCCATCG	chr7	+	856704	GGG
TGTCGACAAGTACAGAGAAG	chr14	+	86239	AGG
AAGAAATTGAAACTTACGTC	chr11	-	475344	AGG
TCTCATCGTGAGTGCAACAG	chr16	+	453072	CGG
GCTTCAGTGCGTACGACTCA	chr15	-	842078	TGG
TTACCCGGTTGAGTAAGGAA	chr5	-	546643	GGG
ATAGAGGCTGGTCTGGCACA	chr10	+	377222	AGG
TTTTCGTGCTAGCCCTACAA	chr8	+	381390	CGG
AGGAAGTCTTCGATAGAGTG	chr10	-	690774	AGG
CCTCACATATATGATATCCA	chr6	+	36377	CGG
TACAATGAATGTGACCACTC	chr14	+	155116	CGG
TATAGATGCATATAAATCAG	chr7	+	508052	TGG
TTAATCAAGGTCTGTTATCG	chr4	-	1456086	TGG
GGAACACAAAAAACATACTG	chr5	-	246990	TGG
GAGTAGAAGATCATTTTACG	chr11	+	364963	GGG
GCAAAAACGAAACATCGGCA	chr13	-	95531	TGG
ATTATTTCTTTCTGACGTAG	chr4	-	1507573	TGG
AAGGTCCCACTCTTGTAGCA	chr14	-	610188	GGG
AAGCAAACGGGAAAAGTCAC	chr11	+	625889	TGG
TAGCGCCAAATAAGTGATAG	chr11	-	130403	AGG
GTCTGCTAGCTCTCATATCG	chr6	+	95589	CGG
ACTACCTCCGCCCAGCAACG	chr10	+	490686	CGG
CCAGACTTCTTCAAGCAAGT	chr2	-	496827	TGG
CCCAAATGTTTGTATAAGGA	chr15	+	446867	CGG
CAAAAATATTCTACAGGAAT	chr4	-	657398	CGG
TTTACACAGAGTATTATCCT	chr8	+	501407	CGG
GGTAAGGATGCATTCCGAAG	chr10	-	186568	AGG
GAGACTCTACCGCCTGCAGT	chr13	-	242051	CGG
GTATGGCTTTATATACCGCG	chr7	+	165249	CGG
TGTCTATTGCATAATGCACT	chr8	+	452806	GGG
CAGAAGTCAAATGAGGATGA	chr14	+	275969	CGG
ACAATGTGCATTTGGATGAG	chr6	-	106473	CGG
CGAAATACTGCATTTCGCCT	chr4	+	1295692	TGG
CAGGTGGAGTAATAGTTCGG	chr16	+	786134	CGG
CTTATCTTAATCGTACTCCG	chr8	-	168715	CGG
CAAATTGACCAAAGCTCGTA	chr16	-	153053	AGG
GGATTGAGCTGAATGGTGCC	chr13	+	662167	AGG
CGGAATATCAACGGTTGCTG	chr7	+	770408	TGG
AAAAATTAAAATGAGTATTA	chr14	+	122781	AGG
AGCCCATCAGAGTGCAACTT	chr10	+	191708	TGG
ATTATTATGACTTTTTATGG	chr12	+	100669	CGG
TACGTACACTGTAGTCTTAA	chr12	-	404410	GGG
GAAATAATGGCTAACCATTG	chr7	-	308687	AGG
ATGGAAGGGCCATTTCCACA	chr14	-	122693	GGG
AGATACATGGAAACCGTCTC	chr12	+	498266	TGG
AGTAGAGGTGTATTCTGAGG	chr15	-	805148	AGG
CCCCTCACTTGTACTGCCAG	chr13	+	544900	CGG
TGTTGAAGACAACATTTACA	chr6	-	28298	TGG
TTGAGACGAAACCTGGTTCA	chr4	+	1436426	GGG
ATAGACAGGAACGAGAGTCA	chr10	+	503853	GGG
AGACCCATAGATACATACGC	chr5	+	51875	AGG
GCATTTGTTCAGGCTGAGCA	chr12	+	1006425	AGG
AAATATGATGATAAAGAAAT	chr5	+	33990	AGG
AAATGTGAAAAGTGTACACA	chr10	+	458515	TGG
GTATTTTACTGAATGCTTCT	chr5	-	11448	TGG
AACGTTGATCAACAATAAAA	chr13	+	424888	TGG
TTTTTTGAAGATGGAAATTC	chr16	-	511757	AGG
TGCCCTTACTTGCAATAAAC	chr11	-	309789	AGG
AGTGTACCATTAAGACGAAG	chr13	+	253283	TGG
GCCAAGAATGCCCCGAACAG	chr12	-	230700	CGG
ATTGTGACCTAATATTAGAA	chr8	-	488482	GGG
TCCAAAATCATGTTTACTAC	chr4	+	909820	TGG
AAAACAAAAGAACCAAGATC	chr13	+	559084	GGG
ACGCCTTTTCTTTTTGCAAG	chr4	-	1490065	CGG
TAAGGTATTTTTGTTTATCT	chr12	-	498190	GGG
AACAATTTTGACTACGTCAA	chr4	-	690497	TGG
TTTTCGATTAGCAAAGAATT	chr13	+	298036	TGG
GAACGATCGTAAGATGCTAT	chr4	-	215646	TGG
GTCATCATCTCGAAAAGATA	chr8	+	159359	TGG
CAACTGCACAATGCCAAAAA	chr2	-	431272	AGG
AGTACCTACAGAAAAAACAA	chr12	-	784703	CGG
AGATTCAACAGCAGACTTGA	chr7	+	1049343	TGG
TCTTTCAAGGAAGCTTGACG	chr7	-	521875	CGG
AGTAGTAAATATCAGAAGAT	chr4	-	1398863	AGG
ATGCTATATGGCGCCCATGA	chr14	+	108039	CGG
GGGCTGGATAGAGGGAAAGG	chr14	-	605029	AGG
CGGCTCCTCCGTTGACGAAG	chr4	+	1174071	AGG
AAAGACTAGTGATCCTTACA	chr8	+	62712	TGG
CTTAAAGAACGGCGATAAAC	chr12	-	958041	TGG
CACACATCAATCAACGCGCA	chr15	-	923104	TGG
ATTGACCGCCTGCAACACAT	chr4	+	463271	AGG
TTCTTGAAAGGATTGAAGTG	chr10	+	622826	AGG
TAAAATATGTATGTGCTTCT	chr11	+	447852	TGG
TATCACAGTAAAAGGCAAAG	chr12	+	88453	GGG
AATAAAATAAACGCCCAAAG	chr9	-	100200	AGG
TGATCGAGAGGTAGATGATT	chr16	+	747340	TGG
TCGTGCCAGGTAAAAATGCA	chr13	+	58545	GGG
AACTGCACATAATTGGCGAC	chr5	-	567616	AGG
CACCACAGCAAATTATCTGT	chr15	+	1010946	TGG
TACTGAAAGTTCCAAAGAGA	chr2	-	278512	AGG
AGGAGCGATAGTTGAGTGGT	chr14	+	507726	AGG
GCAAGTAGTTCTTACATCGC	chr4	-	1345248	AGG
GACTTTAGAACGAGAACCTG	chr12	+	626576	TGG
TTACTGCACAATTCACACGA	chr12	+	125535	TGG
CACCCCTAAAGTAGGTGGGG	chr15	+	165545	AGG
TGAACGTAAGTGCTTCCACA	chr1	-	154613	AGG
AAAGAGTTAACATTAGGAAA	chr15	-	939470	CGG
ATCCAAATTTTCATACCCGG	chr4	-	1275376	TGG
CCCTAATATTTTAGCGAAAT	chr4	+	1145077	AGG
GCGTAAAATGTGGCTCACAG	chr13	+	854808	AGG
GAGGATTGACAGTAACTGGG	chr7	-	932040	AGG
GCGCATTATCATCGGAAGAA	chr4	+	1125405	AGG
CTGTTTTGGGTGAAAATGGG	chr15	+	424115	AGG
CAAGTGAAGAAGATAAAAAA	chr15	-	1031349	AGG
CATGACTGAGTGATTGTAGT	chr14	-	778977	TGG
AAAACATAAAATCTACAAGA	chr6	+	164945	AGG
CCGCCTCAAGACAAACCAGC	chr16	+	165739	TGG
GTTTGGAATTGTAACGATTG	chr11	+	634958	TGG
ATGTTTATTCGCGTTTGCGC	chr4	-	592068	TGG
TTATGAACCCTGTGCCCGAG	chr16	+	188864	GGG
AATATATGTAGATTATGTAT	chr4	-	1184389	TGG
CAACTAGATGCTCTATACAA	chr14	-	145744	TGG
GTTTTGATGAGAATGAACAG	chr12	-	522157	CGG
AGGTTAAATGAAAAATAAAG	chr12	+	368618	GGG
TTGATCGAGGCGAGGCGAAA	chr12	-	196653	GGG
GTAGGTAAACCTATCTTGCG	chr4	+	303149	GGG
CACAGAACACAGAATGAAAC	chr3	+	30527	TGG
CTCTGTGATAACGGTTGTGA	chr13	+	659118	GGG
GCTTGAGTTATTGACAATAA	chr10	-	717861	TGG
TCTTTGCCTCTGGGGTTTGT	chr16	-	382965	AGG
ATTAGGACTTGAGACTCCAG	chr13	-	441816	GGG
TCGCAAATTATGTCTTGGCA	chr15	-	552874	AGG
GACGATTTTACTTTTCATGG	chr14	-	370247	TGG
CAAGGAAGAACAAGAAGAAG	chr16	-	296876	AGG
GGCAACGAATCACACTCAAG	chr4	-	936168	AGG
CTTTGGTGCTATGTTCCGCA	chr15	-	168494	TGG
TCTTCAGTTTCTCTGTATCT	chr8	+	101916	TGG
AAAAATATGCGTTTAGCGGG	chr12	+	234649	CGG
AAAACTTTTGGTGAAGAACG	chr11	-	446269	AGG
TACAGTATTAGTCGCCGCTT	chr2	-	429376	AGG
AGATGCGAATAGCCTAAACA	chr11	+	15771	AGG
CGGACCATGCAGTACAAGAC	chr14	-	668029	TGG
GAAGGCACTAGAATAAAGTG	chr2	-	634931	AGG
TATATCGCATAAATACTTCA	chr9	-	357317	AGG
CGCCTTTGTCGAAAGAAAAG	chr16	-	156308	AGG
GTAAAAAATAACGCAATATG	chr12	-	416653	TGG
TGTTGCGCTAGTATGGCATG	chr11	+	510559	TGG
TATTAGAAAAAATCCCGGTG	chr15	-	516964	AGG
TTGGAAGCGTCAATTGCAGT	chr14	+	674471	AGG
CTTTGATGACAAAAGATCAC	chr15	+	954115	TGG
CTTCTCTTGTCCTCATCCGG	chr9	+	126068	TGG
CCCTAACAAATCTCTTGTAA	chr16	+	370521	CGG
TAAGAAGCCTTTTCCATGTG	chr12	+	954814	AGG
TTTGCGTAGTAGACCTACAC	chr12	-	224824	GGG
ACATAATAATACACCTGTCA	chr12	+	196720	AGG
AATGAAAAAAGAAAGGTGAG	chr5	-	225447	GGG
ATCAAGTTTTCAAACTTGCT	chr10	-	419864	AGG
TCTTGATAAAGAAGCAATTT	chr4	+	1190012	GGG
AATGGCATTGAACTCTTGAT	chr16	-	791044	CGG
CGTTTCATAACAAGGAAACT	chr9	-	255037	TGG
TACTAATGGTTGGAAAATTG	chr3	-	120745	CGG
TTTGTGGAGCGGACCCACAA	chr15	+	441002	AGG
GCTTGAAAGTTTGAAGAGGG	chr7	+	746310	AGG
GATCAGAAAACTACGAAAAG	chr2	+	273883	AGG
CGTTCATCAAGAGGTCCCTG	chr13	+	687571	AGG
TCCTGTACTTGCTGATATTG	chr4	+	426825	TGG
TATAACTCTTGTAGTTTACA	chr12	+	1035780	TGG
AAAAGAATCAAGGTTAACGA	chr2	-	527059	CGG
TCTGTCTAAATGTATATTTA	chr14	-	116607	CGG
TACCTGAATCTAAAATTCCC	chr10	+	525951	GGG
TTGCACTAAGATTACTGATC	chr11	+	247744	AGG
AGTGACATTCTAGTGGATGT	chr5	-	484148	AGG
ATTTTTATACTTATTCCACA	chr4	-	884649	AGG
TATGTTCAAGTGCTAATTTA	chr12	-	973081	AGG
TTTTTCTTTGATATGCCGGA	chr4	+	460420	AGG
TCACCACCGTATTAAAAAGG	chr13	-	9890	TGG
GGTGTCACCTAAGCATTTGG	chr7	+	1012525	TGG
AGTGAAACGGTAATGCCGTG	chr7	-	798294	TGG
TTAATAAAGAACTACCAAGA	chr2	-	633451	TGG
TAATAATAATTAAACTGAAA	chr10	-	374140	CGG
ATTATCGACTGGTAAGCAGA	chr7	+	733078	AGG
GCGGTATTTGATACAATCAA	chr8	-	286293	CGG
CTCTTTTTGAGCTTCAGGGG	chr4	-	755217	AGG
CGAAAACCGCTACTACGTAA	chr8	-	280339	AGG
CTTATAAAACAAGGAGAAAA	chr14	+	375322	TGG
ACGTGCACGCTTCTATAAGG	chr14	-	568277	TGG
TATCTTTTACTTTTATGTCG	chr9	+	47576	TGG
TTTTAAGTAACATCGCGCAC	chr14	-	635428	AGG
GAGCCACCCAATGAGCACTG	chr7	-	785813	AGG
AACTGATCTTACGCTATTTA	chr8	-	429313	TGG
TCGTCTTCGTCCCGTGAGTG	chr16	+	502433	CGG
CCTATCGTCATCATGTACCG	chr16	-	758570	TGG
TAACTTAAACTAGCTATGCA	chr12	+	907084	GGG
GAGTAATGAAATATTAGAAA	chr16	+	156415	TGG
GGAACTAAGGAATACTACAA	chr4	-	718832	GGG
AAACGCGATAATTATAGGCA	chr12	+	164310	TGG
TTTATCACACATGTACATGA	chr4	+	507708	AGG
AAAGAGACGAGTGAAATTAG	chr15	+	544709	TGG
GTGTAGATGCATCTCATCGA	chr4	+	1087468	CGG
GGAATTTGCCGACAGGACCT	chr13	-	751460	AGG
CTGATACAAGATTGCCATCA	chr2	+	528085	AGG
AAACTCATAGCTTATAACGA	chr11	-	454818	AGG
GAAGTAGTAGATGGAGACAA	chr15	+	48695	CGG
TCGACCATCCTAATATCCCG	chr10	+	642049	TGG
TACGAAAATAGCAGTTCACG	chr8	+	32907	AGG
AGCAAAGCGGAAAGAATCTG	chr14	-	692121	GGG
CACAGCAACGTAGAGCAGCA	chr7	-	1040108	AGG
CGGTTTATTATCGGTTACAG	chr12	-	856317	TGG
TGGCTCTAATAAGGAAAAAC	chr12	+	201558	GGG
TTGCGATTTTACACTCTTTA	chr9	+	237865	CGG
AGCCTGCTAAAATGCAGTGG	chr8	+	484420	AGG
CACACCATAAATAAAGGTAT	chr4	+	403618	TGG
ACGAACTGTTTTGAAACTGT	chr2	+	107327	AGG
TTTCGCCACTAATGGTCCAA	chr7	-	80694	GGG
TAATAACATATACACAAAAA	chr10	+	540650	AGG
TGCGCTTTCAATACGTGTAG	chr14	-	138125	CGG
AGATGTATCATTGTCAGACA	chr11	-	521672	CGG
TGTAGTTTATAAATAAACAA	chr9	-	127359	TGG
GGAGATATGTATTAATCGCT	chr7	-	255301	CGG
AACCCTGCGAGAATATACAT	chr5	+	67155	GGG
CAGGCCAAAGGTGATACGAC	chr11	+	353236	AGG
AAATCGATGCATATTAAGGG	chr15	+	618536	AGG
TAGCATAAATGGATACACAA	chr4	-	1366889	TGG
ATAACAATGCTGAGACAAAA	chr15	-	471465	AGG
AAAAAATCACAGATAAGTAG	chr7	-	951809	AGG
TTAGGCTCGAATACGAAGTT	chr1	-	128213	TGG
TAATGCCATAGCGAGGACCA	chr13	+	556957	GGG
GTGCTCTTTCACATTCTCCA	chr16	-	146823	AGG
ATATATACATATACGCAAGT	chr10	-	317065	AGG
AGAATCAAGAACTTGGAGGA	chr12	-	884839	AGG
TGTCAGGTGTAGTTCCTAGG	chr11	-	154590	CGG
CGAGTCTAGTGCAAGTACGT	chr15	-	154766	CGG
GGATCTTTAATTCTGTTTCT	chr7	+	411204	TGG
GAATTTTATGATAGAACGAA	chr3	+	155282	AGG
AATAGCACGAGAAAATTGAG	chr15	+	80400	AGG
ATTCATTAAGGAAGTGAAGT	chr13	-	196006	CGG
AAGTTACCATATCTGAAGAC	chr5	-	539344	TGG
AGTCCGCATTACCCGGAGAA	chr4	-	372093	CGG
ACTGATAGATAACACACATC	chr2	-	196295	CGG
GTTATTATCAGAATTGGGTA	chr4	+	848194	CGG
AAAATCATCCCAAAATCAGA	chr13	-	571049	TGG
ACAGCTGCAACAGTTCCAAG	chr5	-	192501	CGG
ATACAAGTTGGGTCCAGGAG	chr4	-	1050476	AGG
CCCCTGTTCTCATTGAGTAA	chr14	+	247051	TGG
GCAGCAAGCTTAGTATCAAT	chr2	+	785138	AGG
AAGGCTCGTTGTTGTGTTTG	chr12	+	705264	CGG
ATTTCAGCCAGTTTACTGTT	chr7	+	174161	AGG
TCTTTGATTAATCTCACTTG	chr16	+	225885	CGG
GCATCTCATTGGTATCATTC	chr12	-	672703	TGG
AATGAAACCCAAAATACTTA	chr15	-	357476	CGG
CAATTAACAAGTTTTCGATG	chr14	-	473306	TGG
AACATGTTTAATAGTTCGAA	chr13	+	451490	CGG
ATAGATACACCACCAAGACT	chr7	+	96803	AGG
TGGAGAGCCCCTGTCAACGG	chr14	+	372091	AGG
TAAGCATGTGGAAAAAGAAG	chr16	+	373241	GGG
ATAAGATTAAATTATATTCT	chr14	-	222645	AGG
ACATACAGTGTATATATTTG	chr10	+	407327	TGG
AGCCTGATACAAATCATTGG	chr10	-	542643	TGG
GATGATGATGATACCGGTTA	chr11	-	561756	CGG
CAAGCGGGCGTATCATACAT	chr11	-	14436	TGG
GGTGATGGGCTGGATTGGCA	chr13	+	763250	AGG
CACTGGTAAGCAAAGGATTG	chr1	+	36206	AGG
CCTTTCAATCGCCATCAAAG	chr4	-	1103340	AGG
GGCCAAAAATACAAGAGAAG	chr12	-	902961	GGG
TTTCAAAACATAATCGCATG	chr15	-	445998	CGG
GTTGAACAAGATTGATTTAG	chr13	+	545561	TGG
TACCTGCTGAAGGATGCTAA	chr2	-	711250	TGG
ATTCCTGTGTAGTCGGGTAA	chr5	+	541557	TGG
TTAGTGTTCGTATGTCAGTT	chr4	-	1468687	TGG
CACCTTGGCGTCTGCAGTAG	chr12	+	340880	TGG
TCTGTAAGATAAGAAGAGTA	chr12	+	1028137	CGG
ATATTATTATAACCTGAGAA	chr12	+	179826	AGG
TTTGTGAGCATGCAACAAGA	chr2	+	47416	TGG
AACAACGTGAGGTAATTCCA	chr13	+	230972	TGG
TTACATAGCCCAAAGTCATG	chr13	-	808512	AGG
ACGAATGCAAATATAGCAAG	chr15	+	878290	AGG
ACTTCTGAACGGCTTCCTTT	chr13	+	252875	TGG
AATACGTCTCGTTTCTTCAT	chr15	+	357440	TGG
GGTCGTAATACAAATAGAAG	chr7	+	607185	AGG
TAGAATTGTTAAGAAGAACA	chr15	+	636907	AGG
ATAAATACATATGACTAAAT	chr9	-	258374	GGG
TTAACTGTAGCAACCAAAAA	chr8	+	242163	AGG
ATATACCTTTTAAACTGCAA	chr11	+	450672	GGG
ACCAACCGAGCCTAAAAAAG	chr4	-	1174506	AGG
ACTCAATACTTTATGAAGCC	chr12	-	433606	CGG
AAAAATTGCAGGTATACTAT	chr14	+	769524	GGG
AAACTGATAAATTGGACGAG	chr5	-	11226	TGG
GTGTCGTTATTGCAATGGAA	chr10	-	471824	TGG
TAATCCTACGATACAGTGGA	chr3	+	298893	CGG
AAAAGAACTTCACAGGGTAA	chr16	+	455115	TGG
AGGTTTCTTGCAAATGAGCG	chr1	+	52702	TGG
TGTGATGTATCAAACAAGCT	chr11	-	517910	TGG
AGAAGCTAGCCCACCTACCT	chr16	-	794740	AGG
TCACTCGGCTGCAACGAGCG	chr16	+	551895	GGG
AAGAAGCAAAACTTTACTAC	chr6	-	131399	CGG
AAATCTATGAGGAAGAGGGT	chr15	-	384723	AGG
AGACAAGGATGAGGGAGAGG	chr10	+	387925	TGG
AAACTGAATAATGAGAAAGA	chr10	-	722176	TGG
TAGAATGTAGTTTCATACCC	chr13	-	762118	GGG
GGCACTTGTCACTACCGACG	chr7	-	56272	GGG
TTGTTAGCAGAGAAGCAAGA	chr13	+	861157	AGG
AAAAGCTTCTTTTTGATACA	chr7	+	281506	GGG
TCAAAGGAATATGAGAAATG	chr4	-	620272	CGG
ACGTAGAGCTTATATGGTGA	chr4	-	264202	AGG
TGAAATTCAAAGATACCTGA	chr16	+	671046	AGG
GATTTTCTTCTGAGAAAGGA	chr4	-	447692	AGG
GGTGATGTCTCATTTCAATG	chr11	+	642568	AGG
AAATCTCATATAAGCCTGCA	chr7	-	496608	AGG
TACAAAATATCAAAACAAAT	chr4	-	906917	TGG
AGTATTAGATTCCATAAAGA	chr4	+	73537	TGG
TATAGATTGGCGGCCGCTAA	chr8	-	225307	CGG
AGGCGCCATGATTTCTTACA	chr13	-	861182	CGG
CCCGGCCTAGATGTAGATGA	chr5	-	177645	CGG
CTGCCACAGAATTATCACGA	chr8	-	438970	TGG
CAGGAACCAGTTATTGATCC	chr13	+	323029	TGG
AATACAAAACATAGTCGTTA	chr10	-	608905	TGG
CCGGGTAAGAGGTTGTACTA	chr16	+	125889	GGG
AGATTAAACGAAGTTACTCC	chr10	-	458414	AGG
ACGTAAAGAAAAAGATCCTG	chr3	-	74146	GGG
CATGAAGATCAAATGCTCCA	chr15	+	135655	GGG
GTAAAGTGATCTGGGCTGTC	chr15	-	204712	AGG
AACACCAACAACAAACCGGC	chr10	-	84023	AGG
TGGATGAAATGAAGAGTGTC	chr9	-	49989	CGG
GGGCATAGGCAGCAGCTCAC	chr8	+	209149	AGG
ATTAACAATTAAGCAAATTT	chr13	-	540861	AGG
CGGTTGTATTCAGAACTGAA	chr10	-	306200	AGG
TTGAAATTTCTTTGATACTT	chr9	-	188934	CGG
AAGTGAGCCTCGTAATACAG	chr2	+	539888	GGG
TGAACTGAATCATTATGAAG	chr14	-	19567	CGG
ACCCCTGAACCTAGCTTCAT	chr14	+	80204	TGG
TAAATTAATAAAGTTACTCA	chr16	+	837686	CGG
GATGAGATGGTTGAGAAACA	chr5	+	57968	CGG
ATTCTTGGGACTGTATCTCA	chr16	+	591255	TGG
CAAATGTAAAGAGGCTTCCA	chr10	-	316340	GGG
CTTCTTGGCTTGCAGCCATT	chr12	+	502050	AGG
TCAGCGATCCTGAAGAACGT	chr12	-	54277	CGG
GGAAGTATTTTAAACTTTAT	chr7	-	285934	AGG
ATTTAAAATTTCAACATGTG	chr13	+	123245	TGG
AGAAGAAATACAGTTCATTG	chr10	-	305802	TGG
CGGATCGTCTTTGCCCTTTT	chr7	+	454689	TGG
GTAGATGCTAAATGTTATCG	chr12	+	787610	CGG
GAGTAATCTTCAAACACGAA	chr13	+	806600	AGG
GATCCTCAATTTAGAGAGCA	chr13	-	391578	AGG
CACCTTTGAAAATTTTGCGT	chr12	+	202774	CGG
CATTGAGATCAATATTGTCT	chr11	-	558864	GGG
CATGAATTCAAGGCCAGCAG	chr5	+	402418	AGG
CACAGGTGTGGTGGTAGTAT	chr15	+	825679	TGG
AAAAAACACCAGGTATACCA	chr16	-	883513	AGG
ACCTGTACGCTGTAGTTCTG	chr5	-	366863	CGG
ACTTTCAGAACCCTTGAGTG	chr7	+	494126	GGG
ATTATTGTTCATATCTTCCA	chr14	+	762851	AGG
AATTATATCAGTTATTACCC	chr5	+	117049	GGG
GTGACAGTTATGCACCTCAG	chr7	+	887982	CGG
AAAGTGTAAACATAAAATGT	chr14	+	222593	TGG
AGATGGCGAGAACTATGCAA	chr16	-	143037	AGG
ATAAAAGGAAATTAAGAACA	chr12	-	343824	GGG
GGGGCCCGTTCAAGAATGGG	chr7	+	985660	AGG
ATAAATAAACGGGCCCCTTG	chr4	+	832670	CGG
ACAAAGCGTCGTGGTTTAAA	chr15	-	721523	AGG
CCAGGCGGATCAAGAAAAAG	chr15	-	592449	GGG
AAGAAATGACAGGCAGAGGA	chr4	+	1199001	GGG
CGGATAAAACTTCCTTAACG	chr12	+	588878	GGG
CGCCGGCTAGAGGCACAGAG	chr2	+	161591	AGG
AATGGAGACTAGTGCTGACT	chr8	+	484058	GGG
AGTCAAATGTAAGTTATAGA	chr15	-	762587	GGG
GCGTTGGCTAGTGTCATATG	chr4	+	121981	CGG
AATACTGGCTGTTTATCACC	chr4	+	292807	AGG
AATTCAACGGAATTCAGCCA	chr4	-	73583	AGG
CCGAGGCAGAAAAGAAAAAG	chr14	-	716522	AGG
CATCGCATCAACTTAAACAT	chr15	+	981643	TGG
ATGGGGTTCAGAGTGATAAG	chr2	-	126592	GGG
TTCTCGACAAATAAAGAAAA	chr3	+	30648	AGG
CTTCTGTTGGGAAAGCAACC	chr5	+	156857	AGG
GAGTATGTCTGATTGGAAAA	chr15	+	840967	AGG
AAGAATCCCTTAAATATACT	chr7	-	717222	CGG
TCCCCCAACCTTGCAGATGA	chr4	-	1271001	GGG
GATTATTTTAGCAATATTAT	chr7	-	516694	GGG
ACAAATCGAAGCTTACAAAA	chr14	+	585629	TGG
TTTAAATGCACAATAAGGGG	chr9	-	416059	GGG
GAGAACAATGACGCCAAATA	chr2	+	385998	TGG
ATTTACATTTGGCATGCCGT	chr2	+	717967	TGG
TCAATTGTCCGTTCTTCGAC	chr15	-	6931	GGG
AAAGAAATGGATCAGCAGCC	chr5	-	80322	GGG
GTTCAGGTCATCGATCAGAG	chr6	-	227012	AGG
TCAACAGGAAGTCTCCGAAG	chr16	+	797591	AGG
GGTGCGATGCGATGATCTTC	chr15	+	333475	GGG
TCTCTTCAGACGCTTTACAG	chr16	+	429742	CGG
TTCGCCTTCAAGAATATCCC	chr4	+	617556	AGG
AAATAATTTGTTATTTATCT	chr15	+	849456	TGG
ATTATACAACAAAAGCGTGT	chr7	+	12442	AGG
GCTCCAAATAACAGTAACGG	chr15	-	69887	CGG
GTTGACTTCCCTGAACCTGG	chr15	-	817319	TGG
TCTGTGACATCCCACTCCGG	chr7	+	584307	CGG
TATTTAATTTTCATGCAAAC	chr11	+	356185	GGG
TACGCTGCTGTCATTAAATA	chr4	+	784706	TGG
ATGACACCTTTACTTTAACC	chr13	+	547550	GGG
CTGATGATGAGCTTATGGTA	chr14	+	214837	CGG
TGTAAATACAATAAGGTTAA	chr5	+	9575	CGG
ATTTGATTAGTAAGATCCTG	chr7	-	323960	TGG
CAGACAAAAAGAAACAAGCT	chr3	-	31292	GGG
TATCTGCGATTACCGCCCAG	chr15	-	898550	TGG
AAACAACAAAAGCGTCTCCA	chr4	-	141559	AGG
TCGCCATACTTTACTGTATG	chr9	-	201930	GGG
TTTGTCTTACTGGGTATCAC	chr13	+	141881	AGG
AAGTTTTCAAGCTCTTCTAT	chr14	-	31507	TGG
TTAATAGAAAACTATTGTAA	chr7	+	148164	TGG
GTTAAAAATTTCATAGCTAA	chr16	+	677166	TGG
GTATTTGATAGTTAGGCAAA	chr12	+	885043	AGG
CCAAAAAGTGACGGTGGTAT	chr14	-	591458	TGG
TTGATGATCTCTTCTTGTGA	chr15	+	94438	TGG
TAAATACGATAGGACCAGGG	chr4	+	588032	GGG
ATGTCATTTTAATAATTGAA	chr2	+	749518	TGG
ATTAATGAACTATCCACATG	chr1	-	101563	AGG
AGAAGCAAGAAAAGCCACAA	chr2	-	201623	TGG
ATTGAATAGCTCAAGTTATA	chr10	+	140354	GGG
TGTAACTGTAGTATTGAACG	chr10	+	349407	TGG
TAGGCTAGCCTGCAGCCAGA	chr7	-	654396	GGG
TCTTCAAAGTTAACACTTAA	chr14	+	723182	GGG
TGTGAACTTGCATCATAAAT	chr4	-	547798	AGG
TTATACGACGTCAAAAGGAA	chr15	+	158801	GGG
GATTAAAGACGTTTTTGGCA	chr8	+	56281	TGG
TTGGAAGGATTCTTAAAACG	chr9	+	188647	AGG
CTTTTTAGATCGCTGCGTGA	chr12	-	603347	AGG
CGTTCTTGCCTGCCATACGT	chr16	-	381659	GGG
GTGCTTTTAGAAATTTGAAG	chr4	+	1359666	CGG
GACATTTGAATATTTTTGAT	chr10	+	633365	AGG
ATGACGAGCCATCTTTGTCA	chr16	+	386455	GGG
ATGTGACGCGGTATCACAGG	chr15	-	304746	AGG
GAACCTGTTTCCAAGAAGAG	chr11	-	346596	AGG
TGTGTCTGTCTGAGGACGGG	chr14	-	525717	AGG
GATCTGACGAAGCCACGGTA	chr12	+	658488	AGG
AAAGTTGCTTAATATTACAA	chr4	-	421615	AGG
CCCTGGCCTCCAACAAACGA	chr11	+	99954	CGG
GATGCTAGAGATAATATTGC	chr4	-	36404	TGG
CTCATCAGACGTTTTTCAGT	chr2	+	360535	AGG
AATTTTTCGACTGATATTTC	chr16	-	379145	AGG
AGACATTTGAAATTATACTG	chr7	-	867387	GGG
TAGCGATAAGATAAAAACAC	chr9	+	410644	AGG
ATAGCCATTAATGTACATGA	chr9	+	45868	AGG
ATTTCATCATTTAGCCCAAA	chr8	+	151484	AGG
TCTAAAAGTAATAGATGCCA	chr2	+	132040	TGG
CCAGGAAAAGAAAAAACCTG	chr11	-	580989	GGG
AATAATAATAATGGTGGTAA	chr9	-	51645	TGG
TAAACAGTACACTGCATCAG	chr7	+	738624	TGG
GTACGCAGTCATTAGGACAT	chr14	-	569760	AGG
ACAGATCCCAGAGAAAAGCA	chr15	+	170233	GGG
ACGTAGTTAGAATTTCATCG	chr12	-	766640	AGG
AACATTCGTAGCGACAACCC	chr15	-	1049224	TGG
CAAAGAAAAGTTGAGAACTG	chr16	-	191241	TGG
AAAGCTATTAAGTAAACTTA	chr4	+	1164730	TGG
TCTCTCTCTCCAAGTAAGAT	chr10	-	432109	TGG
AAACTCTACTCCATTCTACT	chr16	+	135605	GGG
GTCGGCGACGGCGGCTACGA	chr12	-	871271	CGG
TCAAGAGAAGAAGAGTTACG	chr16	-	41082	AGG
GAAATATACATTACGTATGT	chr12	+	99018	AGG
GTTTTCACGAAGTGATCGAG	chr16	+	747328	AGG
TCCATAAAGTATATCATTTC	chr16	-	286578	AGG
ATATACATCAAGAAAAGGGA	chr16	-	393692	AGG
GCGGCAAAAAATCTCCGCGA	chr14	+	519107	CGG
ACAAACTCAGAGAGAATTGG	chr10	+	90552	CGG
TCGAAACATTCATTGAGTCG	chr11	-	201340	TGG
AGTTGAAAAGGCATGAATTA	chr8	-	302364	TGG
GTCGCTTAAAGGACCGACCC	chr7	+	902483	AGG
TTCTTACTAACGTTAGTAGT	chr8	-	406659	TGG
TGGATAACATCAGAAAAGCA	chr7	+	292903	AGG
GATTGTCCAAGTTAACACAA	chr15	-	710415	AGG
AGAAGTTAAAATCTAAAATC	chr12	+	707291	AGG
AACGGAAACGCCCACCACGG	chr9	-	54937	TGG
CAGTTGATCCGCATTCCCCG	chr8	-	296931	TGG
CACGTGCCTTGCTTAAAGCA	chr5	+	562798	GGG
ATTCGTTGAAGCTGCACCAA	chr7	+	375583	AGG
ATTTGGTTCTTATTCTTGTT	chr15	-	99305	GGG
TTATTGTAAATGATTTGGTG	chr15	-	349994	GGG
TAACGATAGGTACTTGGTCA	chr13	-	397156	CGG
AGAAAACGTGTTGTTGCTAC	chr7	-	368170	TGG
TTGCCATAACATGCTAAATG	chr2	-	362502	GGG
GTGGGTAATACAATATTGTT	chr5	-	250468	TGG
AATCATGCTAACGATGACAG	chr4	+	434230	CGG
AGGGATGATAGTGTTGGCAG	chr12	-	675546	CGG
CTTCGTATCTATCCTTACCT	chr4	-	622077	AGG
ATTAATGAGAACTTTGCCAT	chr7	-	215952	TGG
AAGCAAACGACGTAATGCCG	chr5	-	175007	TGG
AAAATTCACTTATAAAGGGA	chr4	+	159495	AGG
CTGAATTTGCTTTTAATACT	chr15	-	560615	AGG
ATGTATTTGTACGTATTGTT	chr16	-	648388	AGG
TGAGGTTCTATGATCTACTG	chr7	-	18104	CGG
CTTCATATCTGGCTTCTTCA	chr11	+	592387	AGG
TAGCGGGAGTGCCAAACGAG	chr16	+	544535	AGG
ATCACCAGAGGATGTCACGG	chr4	-	30223	TGG
TTTCATTAGCTATTATGGCA	chr2	-	647242	AGG
ATAAGAGCAACTCACTGCAA	chr13	+	399506	AGG
AAATCATCAGCTTTTCCAAG	chr8	+	251281	AGG
GTATAAGATTCTCAATTCGC	chr4	+	555869	TGG
AATATTCTCCAAGAAAGAAA	chr5	+	416157	AGG
GGTTGTTGGTGCCAACCCAG	chr12	-	231734	CGG
TTAGTGGTGTTAGAAAAGGT	chr9	+	62848	GGG
AGGAAGAAACATTACCACCG	chr8	-	472390	TGG
ATAACACCGGCGAACAATCG	chr15	+	550747	GGG
GCTGTCGAAGATAATGTCAA	chr14	-	323426	GGG
TTCCCATGTGGGCAAACACA	chr10	+	667080	CGG
ACCAATCTATAGAAATAGTG	chr15	+	136414	AGG
GATCAAAGGGGCAAAACGTA	chr13	-	874897	GGG
CCTATTGGACAAGATTTACG	chr7	-	652864	AGG
TTCATTTCCAAGCAGCACGT	chr6	-	131497	GGG
AAACCATTCTGAAATATGAG	chr14	-	91564	TGG
TGGCCACTGCCTGGGAACGT	chr7	+	661973	CGG
AGAAAGTAACTTCCCAATGG	chr13	+	551322	AGG
TGTGTGCAGCACCAGGTTCA	chr2	-	365549	TGG
AATGATATATATTTAACGTA	chr15	-	844805	AGG
AGTATCCAGAATATACAAGT	chr5	-	232428	AGG
TGCACCGCAGCACGTCGACG	chr1	+	68454	AGG
AGTACTTGTTACCTGTCTGG	chr15	-	481893	CGG
TAACAAGGACTTGTCCCGCA	chr9	-	203217	AGG
GTTTATATAGTTTTCAATGG	chr14	+	386940	AGG
GCCAGTTCTTCTGGTGTCTG	chr2	+	216319	CGG
AATTTGTATATTATTCACCT	chr4	+	442822	CGG
AAGCAAAGATCTTGAAAATA	chr16	-	609939	TGG
GCTTCTGGACATCTACACAA	chr14	-	585259	AGG
AAAGTTCTTATCCTTGATGG	chr12	-	17546	TGG
CCGATAAGGGATCTTTAAGA	chr15	+	449246	CGG
TTATGTATGCCGAACTCAGT	chr15	+	348102	AGG
AGTTATGCAAACCATCAAAG	chr9	-	301332	AGG
GTACTCACTCCGCCGCTGCG	chr7	+	979565	GGG
TATTAGCAAGGAAACAAACA	chr2	+	652939	GGG
TTGAAAGTACTTGTTCACGT	chr7	-	214027	TGG
AGAAAGTACTTGGCTATATT	chr2	+	544974	CGG
TTAGTTCTTCGTCCGAATGG	chr16	+	79193	AGG
TTGAGCCAATTCAAGGGCAA	chr13	-	668045	AGG
AGCAGTCTGCTTGTTGTTTA	chr16	-	63179	AGG
CTACAGGCATTTGATGTTGT	chr4	-	963399	AGG
TCGGAAGGAAACAACGAGTG	chr9	-	232724	AGG
AGCGACGAGAAGTATTGGAC	chr4	+	814445	AGG
ATTCTTCAAAGGTTGATAGG	chr9	-	436098	AGG
CCCGCTTTAGAAAAGAGGAG	chr11	-	473509	AGG
TGTGTTGGGGATGTACTCTG	chr12	+	493140	TGG
ATATAATCTGTCACAATGCA	chr9	-	249523	CGG
AAGAAGTTCTGTCGCTAGTG	chr12	+	517532	CGG
ATTAAGTGAATAATGAAGAA	chr12	+	706987	TGG
AATGTAGCGCATGCAGCTTA	chr10	+	612884	TGG
ATACTGGGTTTTCGTTTGGT	chr7	+	180802	GGG
AAGCCGTTTTGTGATCGGTG	chr2	+	799070	TGG
GAAGTCACTAAACAGATTAA	chr5	+	390378	CGG
ACGCCTTCCAAAATGACCCA	chr4	+	371248	CGG
AAGAAAAATGGAAAAAACAG	chr3	-	29148	AGG
TGCAGTAAAACTGGTAATCT	chr10	-	585707	AGG
TAGCAGCTTCATTCTCTTGA	chr5	-	554077	AGG
GAAAATAGCTAAAAGAAGGC	chr14	+	107736	AGG
TAATCGCAGCAGCTCTCCAG	chr5	-	303045	TGG
CGTCTAGAAGAACAGCACAT	chr5	+	561165	CGG
TCTTGATTTCTGGTATACGT	chr11	+	489682	AGG
ATATCATATATAAGTATATT	chr14	+	576611	AGG
GCTCGTGTTTATCCTCAACA	chr9	-	349955	GGG
CAATGCGTTGAAAAACCCAA	chr5	-	475651	GGG
TCTACTGTTTAAAGCCATCG	chr12	-	849760	CGG
ATTTAAGTAGTCTTTCAAGG	chr10	-	469791	TGG
AAGTAATGCTGATATTCCAA	chr4	+	1399100	TGG
TAGTTACTATGTAGCATGCA	chr8	-	470579	TGG
GAAAGTGCAGATCCCGGTAA	chr4	+	1507715	GGG
ACAAAGAAACGCCCGAAAAG	chr14	+	685806	TGG
TCTCAGCATTGCTATCGAAC	chr7	+	306201	CGG
GTTCACGCTTTCACCCTGTG	chr13	+	472868	AGG
AGAACTTGAGACAACCCGGA	chr10	+	365619	CGG
ATTGTCTTTTTTGGCCAGGA	chr2	-	299754	AGG
AGGGTGGTTTCACCGCACAG	chr4	-	592025	CGG
AGGACGAGAAACATGAGCAA	chr6	+	229469	TGG
ATCGCGGTATATATTAGAGG	chr12	+	253708	CGG
CAGTGAGCTTAAGAAACGCC	chr10	+	88832	AGG
CTTGAAGTGCCCCATCTGCA	chr16	-	720280	GGG
AGTGAAAAATGTCAAAACCA	chr12	-	394967	AGG
ACGTGGTGAATTGAAGTTCT	chr10	+	339512	AGG
TTTTGATCCGAAATGAGGGG	chr14	-	652186	CGG
GTTGAGGATGGTGGTGGTGG	chr16	+	551595	AGG
CATTGATCACTTCTTACGCT	chr4	+	362555	GGG
ATTAACTGTCTATAAAAGGC	chr15	-	670340	TGG
ACCAATAAGTTCATATAGCT	chr5	+	106776	TGG
GATGACGTGCTTCGATTGAG	chr5	+	136957	CGG
TCAAGGAAACGTGGAATACG	chr12	-	196882	TGG
TAGCCTTCGCCTTAGTGGCA	chr14	+	145825	GGG
GAGATATCCAGTATTTGTAC	chr4	-	795141	GGG
TTTAAATCTGATGTTTCATT	chr16	-	103253	TGG
AAGGTGAGTACTCATTGCTT	chr8	-	103832	TGG
TACTGTGTGCTAATCTAGCA	chr15	+	304268	CGG
AATCTTCGATTCTTTGAAAG	chr13	+	668421	CGG
CTAGTCGTCTGGATAGATCG	chr7	-	596509	AGG
TACACTATTAGAAATTCCAC	chr11	+	224383	CGG
AGTACCTGACCTGCAACCCC	chr15	-	111652	AGG
ACCAAATGTTGAAGATCTAA	chr1	+	54914	AGG
ATTATCTAAAACAACACATA	chr9	+	150530	CGG
CTATTTCAAAAAGTAACCAA	chr8	-	429474	AGG
TTTTTAGCAAATTTAGAAAT	chr13	+	298437	TGG
TAGTCACAGAAATATGTCTT	chr16	+	910885	TGG
CAGACACCTCTAGATTTGTG	chr12	+	23237	TGG
ATTTTGCGGCAAAACGTCAT	chr5	-	311556	CGG
GACTTTAGCTAAGGTGACTG	chr12	-	673144	GGG
CATGTCCGACAAGATACAGG	chr15	+	187043	AGG
ACAAAACAACAATCAAACTG	chr2	+	276565	GGG
ATAGCGACCGAATCAGGAAA	chr16	+	770979	AGG
CGCCAAATCTAAGTCACGCG	chr5	+	16220	CGG
AATGGCGGTTGCGATCAAAA	chr12	-	588897	AGG
ATGATTACCGATATCCTCAG	chr3	+	35354	GGG
TCTGGCGTGTGATGACAAAA	chr7	+	330951	AGG
CTAGCCACTTATGCTTATTG	chr2	+	744446	TGG
AGCTGCACATTCATCGAACA	chr7	-	592626	CGG
AAAAATGTAGCTCAAAGAAA	chr14	-	412400	AGG
TAATTCGTATTGGATTTCGG	chr4	-	1300278	GGG
AGAAAAGAAAATGAAAAAGA	chr7	+	383422	CGG
TATTCACATGTCCTGGCGTG	chr3	+	190441	CGG
GTATATACATCTGAGCATTG	chr15	+	286055	CGG
ATTTCCCTTTTTCGTGCATG	chr13	+	173048	CGG
AGAAAAGTGAAGAAAAAAGC	chr7	+	555176	AGG
AAATGACAGCAAGAAAAAAG	chr10	+	310811	TGG
AGATAAGATAGGCTAAGCCG	chr13	+	445367	TGG
ACCATCATACCAAAGTTCCG	chr4	-	1276767	AGG
TAGAAATCAAATCAAAGAAA	chr15	-	303224	AGG
TTCAGCCAAATTGAAACAAA	chr5	-	141424	CGG
TTGGATTCTCTGGTTAGAGT	chr2	+	146747	TGG
AAACGTGATTTGCAAAACAA	chr15	+	316691	CGG
AACCAAATTTAAATTCAACT	chr7	+	532913	TGG
CAGAACTGAAACAAGTATAT	chr16	-	183222	TGG
GGTAAGTCTTGTGATGAATG	chr12	+	437127	TGG
CATGAAAAGAGTTCCAGTAG	chr4	+	976973	CGG
TAATTCGTCATGCAGAGGAG	chr15	-	953845	CGG
CAGGTGCAACGGGACGCAGA	chr10	+	180446	GGG
ATAAAGAAACAGCGAAGCCA	chr12	+	745182	TGG
TCATTAAAGGGAAGAAAGGG	chr7	+	148040	AGG
TGGAAAACCTTACCTCAATG	chr3	+	111744	AGG
TGAGTGCAGTGTGCACGACA	chr10	-	455915	GGG
ATCAAAGGAACTAATCAGAG	chr8	-	498603	AGG
GTAATCGGAGAATACCCAAA	chr13	+	915484	GGG
TACGGATAAGTTAATCTCAG	chr3	+	70175	AGG
CACTGTAAAAAATACAACTT	chr3	+	202509	AGG
TTCGGATAAAAATAAAAAGA	chr7	+	649100	AGG
ACCGGTGCCAACTCTTGTAA	chr10	+	664567	GGG
TTGTTTTCATAAAACATCGA	chr5	+	120512	TGG
TCTTTTTCTGGTATATAAAG	chr13	+	652181	CGG
CAGGCACGTCACTTATAACG	chr16	+	497850	AGG
GTGCCCTCAATCTACCATGT	chr4	-	1226530	CGG
GTAATGACTACACATACTGA	chr7	-	253872	CGG
AACGGCTAACTTGGTTGTGT	chr13	+	350180	AGG
TTTGGCAGTTTGATTTCTAG	chr14	-	742028	CGG
GCAAGCAAGTGGGATCAGAA	chr16	+	677203	GGG
TGAACAAAAGAAAAGGAAGA	chr16	+	565630	GGG
GTTGCCGTAGAAAACAGTTG	chr12	+	1006539	GGG
TCTCTATTCGTTATGTTCTG	chr4	+	1508304	CGG
AGCTGCTATACACATTAGAA	chr14	+	418749	AGG
GGGTAAACCGGTCAATTCTG	chr10	-	676625	AGG
CCATTGCATCAATTTTCGCG	chr12	+	505596	TGG
GAAACCTGGATGATAAACCA	chr11	-	96639	AGG
ATGCACCTATTACTAATCAG	chr8	-	498509	CGG
GATACGTTAGCCAAATTCTT	chr12	-	245196	TGG
GGACCCTTGTAAAGAAATAG	chr12	+	286383	GGG
TTGATTTCTTCTTTCCCTCC	chr13	+	465562	TGG
AGTGCGTTTATCAGCCATAG	chr13	-	898528	TGG
ATTTGACGAAAAAACAATTG	chr10	-	414317	AGG
GTGCAAGATAAACATACCGT	chr16	+	486467	CGG
TTTTTTCAAATTATTTATCG	chr15	+	888887	AGG
TCAGCAGCAAACAAAGTTGG	chr4	+	963474	TGG
TTTTGAGCATAAAGCACAAC	chr15	+	820420	AGG
TTTTAGATATAGCCAATCGC	chr2	+	444790	TGG
TTTTGGAGAGGACTTTATAC	chr12	+	699805	AGG
AATTACCAAAGGAAGAACGA	chr11	-	295718	AGG
AGCTTTCTCTTGTGAACCAT	chr13	-	241795	TGG
AGGGACACTGATCTCATTGG	chr7	-	217237	CGG
TTTCTTCAGCGCTCACTCCG	chr2	-	147025	GGG
TTGAGAACATTATCTCCTGG	chr12	-	514225	GGG
ACTATGTCTGTTCCAATCCC	chr13	+	724643	TGG
TTGCATTTCTTACCAGGACC	chr4	-	167770	TGG
CACGTTGCAGATATATTTGG	chr15	+	274617	AGG
GGCTATCGCACATCTAGTAA	chr15	-	109166	GGG
TCTTTATTTTCTTCGAAACG	chr16	-	639379	CGG
CTTTTTTCGTAGGAATACGC	chr15	-	685592	CGG
ATGAAAGAGATAGAATCACC	chr13	-	330127	TGG
AAGGACGATCTCGGGAATAG	chr15	-	517672	TGG
CTAATATCATTTAGGCTAGG	chr5	-	453134	AGG
ACAAGGGCTCGATTACACGG	chr7	+	55974	TGG
ACTGACCTCTTCATGATAAT	chr12	+	909903	AGG
AATGCGCTCCCGTACGTCAG	chr14	+	281915	TGG
GAAGGCTCTACCTATTCCGG	chr7	+	667419	AGG
CAAGATAATGACACACAGCA	chr9	-	245612	CGG
AAAGCTTTCTTTCTTAACCT	chr7	+	368139	TGG
GAAAAATGAAAGGAGTATGA	chr12	-	845884	AGG
AATGCAACAGTTCTCAAAAA	chr12	+	495392	AGG
GTTCAGGCACAAAATGAAGT	chr4	+	598031	CGG
TCGTTCGATATAAAAAGAGA	chr7	-	545787	AGG
CAACAATTTCGATGGAGCCT	chr13	+	420158	AGG
GTAACGCATATATAGTACTT	chr16	-	191058	TGG
ACCCAGAAGAAGAGACCAAT	chr7	+	667805	TGG
ATTTAATTTCTGTTACCACG	chr10	+	452118	GGG
CTTTTTTCCTGATTTCTGAA	chr14	+	167828	GGG
GACGATAATGTAAATAGTTG	chr3	+	39292	TGG
CTTAATTTTACGTTTCAGCA	chr4	-	576067	CGG
TGACGTAAGAACGCAAACTC	chr4	+	1518222	TGG
GAATTCGTTTGATTGGAAGG	chr4	-	599051	CGG
TTAATGAATAAATGCCAAGC	chr4	-	223830	CGG
TTCAGTGATCTTCAATATTA	chr15	+	375905	GGG
TAGTCTTGTGACGCCAACGG	chr10	-	28106	AGG
AGTAACACATACCATAGCAA	chr7	+	589783	GGG
GTTCTGTCCGTATAAAAACT	chr15	-	128182	CGG
CAGGAACGAGACTAAAGAAG	chr12	+	339773	AGG
TACCAAGTACACAGATGACA	chr3	+	258560	TGG
ACATACATTGTTACATATAG	chr2	-	356807	AGG
CATATGCTCAAAGTAGTGTT	chr8	-	231693	TGG
CTAGTTAAATCATTCAACTG	chr5	-	232336	TGG
CTTGTTTCTCCGCTACTGTC	chr4	-	272440	AGG
TCAAAAATTTCAAACCGTGA	chr16	+	656688	AGG
AGGAGTGATTTGTCCAATCC	chr7	+	527260	CGG
TCTTTACTCCAAGACAAAAG	chr12	+	784486	CGG
TTGTTCGGCTTTTTCATTGA	chr16	+	369865	TGG
AACGAGAAGGACAAACATCA	chr12	+	573979	GGG
GCTGAATTATCCTTATCTGG	chr11	+	92498	CGG
AAGCACGAATTTTACGTCTG	chr14	-	405722	AGG
CTCTAAATTAACTAATATCC	chr12	-	40556	GGG
TTCATAGAGATAGCTGTCTG	chr9	-	277464	TGG
ACGGTGTCCCTCTGAAAAAC	chr13	-	577343	AGG
ATTAGGAAATACGCTAAACT	chr16	+	29865	AGG
GCAGATTTTTCAACTCTATT	chr15	-	65692	GGG
GCATAATACTGAATAGAACA	chr9	-	260010	AGG
ATTAGCCCAACAGCTACTAA	chr1	+	100000	TGG
GTGGCGAGAACTGTTGTAGA	chr13	+	99455	CGG
TTACCTGTCAATTTGTACAC	chr12	-	549150	AGG
GACTGCTCCGTATTACTGTG	chr13	-	801646	CGG
TATTTAAAGAGTGCACCTTG	chr10	-	189766	TGG
AATAAGCTCTCCACTATAGA	chr5	-	432139	TGG
AAGTGTAAACCACATGAATG	chr7	+	185628	GGG
GAGATTGGTAGTTACTGATC	chr8	-	39799	AGG
GCCTGTAGACCGTACCTAAA	chr3	+	223200	AGG
AAACCATCAATTAAAGGGTG	chr8	-	38701	TGG
AGTAAAAAATATGCTGCTAA	chr6	+	263261	AGG
ATTACCCGGATATGTCAAGG	chr3	+	289417	CGG
GCTATGAGATGTGTTGGAGG	chr14	+	488016	CGG
GGATTACTCGGTTTTTCGTG	chr15	-	69050	TGG
CCGAGTGCAAAATCGCTAAG	chr4	+	147736	CGG
CAACGAGAAAAAAGAAACGT	chr16	-	787730	GGG
GAAGAATTACTGAAATGAAG	chr3	+	152320	AGG
CTTCGGTGACGAATTTAGAA	chr13	-	560692	GGG
GATATTGACGATGATCTCGA	chr7	-	200093	GGG
TATTGTTAAAGGTGTAACTG	chr5	-	58175	CGG
CCAAATTTGATTTTAAGTTT	chr15	+	418247	AGG
TTTGTACTTATTCTCGAACT	chr3	+	178719	CGG
TTCTAGGTCAAAGGGCAACC	chr12	-	1043167	CGG
GGAGTTTTGAGAGGGGCGCG	chr12	+	370561	CGG
TTCTTTATTTACTCTTCCTA	chr12	+	237829	TGG
ATCAACCAATTTTCTGTCAG	chr7	+	421988	CGG
TCAACTTTCGACTTATTGCA	chr16	-	318985	AGG
GTAAGAGTATTCAGTATCAA	chr8	+	48213	CGG
GTGCTAGGCGATAAATTAGG	chr12	-	1035889	CGG
TAACAAAAAACATCACGGGT	chr4	-	613804	CGG
GATGATGACTGTATAGATTG	chr10	-	342064	TGG
AAGTGAATGGGGGTTGTACA	chr15	-	252990	CGG
GAGGACGGTGATGAGCGAGA	chr7	-	452031	CGG
TAGAAAGTATCATGTTTTGT	chr9	+	360846	TGG
GTCGAAAAATCAATAAAGAA	chr16	-	689892	GGG
ACCCTACAGAGACCTTCTTG	chr9	-	77565	TGG
ATAAGTCTTTGTTGAGATGG	chr4	+	733814	TGG
ATTGAATGCTGTGCTTTAGT	chr8	+	78402	TGG
AAGATTTAGGTCTTTGAAAA	chr14	+	544982	GGG
TATGTGATGCGTCTTTCCGG	chr4	-	1367004	CGG
TTTGGGATCTGTGAACCAGT	chr11	-	524897	GGG
GAAACACATTCTGTAAATAA	chr1	-	73898	GGG
TCGTCTGACGCGGAAACGTG	chr14	+	519088	CGG
ACATCATAATCATCTGTCAG	chr8	+	369639	CGG
GTAAAAAGGAACCACCTGGG	chr12	-	764361	CGG
ATACTCTTTAGACCCCTCGG	chr16	-	339790	CGG
CTTGGAAAATTTGAAATGAT	chr4	+	308332	CGG
GATCATCCGTCTGTTCAAGG	chr12	-	604052	CGG
GGTCATATAGTAAAAAGCTT	chr4	-	98249	AGG
CCCATGTCCCAGCGATAAGG	chr2	+	87839	AGG
TGATGAGGTAAACCGTAGTC	chr16	+	451227	AGG
AGAAAGTCTAGTACGTGTGC	chr13	+	626268	AGG
GTTAGTGTGATGAAAACGAC	chr4	-	1075646	AGG
CGAACACTACAGGGGACGAA	chr11	-	487190	GGG
AAATAAAGGAAGTTATGTAC	chr7	-	543392	AGG
TCAAATTTTGGGCTCAATTA	chr13	+	514127	TGG
TGGAACGTAAAAGAATGATA	chr4	+	1414298	TGG
AAAAATACAGAAACTACAAA	chr2	+	684724	AGG
TTTTCTTCAATATTTTTGTA	chr14	+	383796	TGG
CTTTTCCCACAAAAGGGACG	chr6	+	74777	AGG
AAATCACGATGCTGCAAATG	chr2	-	714308	AGG
GAAGACACATATTATTTACG	chr11	+	140850	TGG
TCCTGCACAACGTCACTCAA	chr2	-	449426	AGG
GTAATCTAATATAGACAAGT	chr14	-	89930	GGG
TTGTACTGCTGGAAAATGAC	chr3	-	248619	GGG
GACTAGAAGTGTGAAAGTCA	chr9	-	300006	TGG
AGGCTAAGCTTCGATCTCAC	chr4	-	740107	TGG
CAAAAATTTCAACAAATAAG	chr4	-	1461828	TGG
TTCAAGAATGCACTATAGTG	chr16	+	697033	CGG
AAAAACTGTCTAGGTAGCAA	chr15	-	569654	TGG
AGTACTGTTGAGTATTTAGG	chr13	-	822709	GGG
AAAAATTAAATCATTAGAGA	chr9	-	300178	CGG
AAGGCGAGTGAGCTATTGAG	chr15	-	65366	TGG
GGGGTAAAAACTCTTTACGC	chr12	-	150764	GGG
AATAGCAATCAATTCTTGGT	chr12	-	324862	CGG
ACCTGCAACCCCAGGAAAGT	chr15	-	111644	CGG
AGGCCGGCGAAATTTATGAT	chr4	+	316540	GGG
AGCAAGACTAATCATAAGGG	chr11	-	88476	GGG
GATCCACTTGTTTATCGAGG	chr4	+	116210	TGG
TCCAGTTTTTCCAACACCAG	chr4	-	930639	AGG
CAAAACTGGCTGTCAGCGAA	chr16	+	759585	TGG
AAGTGGGCTGACAATGAATG	chr7	+	334893	TGG
TGTGTATGTGTGTGTTGTTA	chr16	+	73071	AGG
TAATATGAACGGAGAATACG	chr14	-	199854	AGG
AGAGGCAGTATCGCCATGTG	chr2	+	652998	AGG
CTGCGGCGGTGAACAGCGGT	chr2	-	602672	AGG
TAGTCTTAACGGAACGCCTA	chr3	+	154921	GGG
GATATGTCTTAAGTTGCTTT	chr16	+	196159	CGG
ACCGTTTGACGGAACAACCG	chr8	-	54672	TGG
AGTCGAATATTAACTTTGGG	chr2	+	241473	AGG
AAGACGTTAGAGTTACCTAG	chr14	-	181348	AGG
ATGATTTGTAGGCAGAGGAG	chr9	+	276497	TGG
TTCCGAATCAAAAGAAAAAG	chr12	+	932437	AGG
TGACAAGAACAAATTCGCGC	chr14	+	407901	TGG
GAAGGAAGAAGAAATAAAAA	chr9	+	290352	GGG
TATTATACCACCTAATGAGC	chr16	+	469613	CGG
CGTAAATTACAACAGTCAGA	chr16	+	349072	GGG
CAATTGACCAGAAGAAGACC	chr7	+	226542	GGG
GAGCATTGGGAAGTACATAG	chr15	+	296460	TGG
AAAAAATAAATGAAGGAAAA	chr15	+	633767	AGG
TTGCAGCATTCTGTTCGAAG	chr4	+	308380	GGG
TTAAAAAAGAAACTCACTCT	chr7	-	27537	TGG
CGCGTCCAGTGCACTCACAG	chr8	+	69751	GGG
AACTTGATACAGTTTGAACA	chr12	+	339297	AGG
AGGTGAAAAAAGCGGCCAAG	chr13	-	589744	AGG
CAAGTACGTAAAAGATAATG	chr14	-	140593	TGG
GCGTTTAATAATCAAGGTCA	chr8	+	150723	TGG
TTGTGCTACTCTATTTGTAC	chr4	-	1077908	CGG
TGCAAACTCATTACTAGTTG	chr15	-	274945	CGG
ATCAGAATCCTGCAAGTACA	chr13	-	560060	TGG
TATATTATCACATACGGCAT	chr15	-	300946	AGG
TGTCTGGCTTTAGTATTGTT	chr15	-	193717	GGG
CATCGCCTCTATGTTAAAAG	chr11	-	5839	CGG
TGATGACATAAATAGTAGAG	chr7	+	393917	TGG
TCCTAAAATCGATCAAGATA	chr12	+	145989	TGG
ACTTTTGAAATTTTTCTTAG	chr10	+	217610	TGG
GGAAACAATGTCCTATCTGT	chr16	-	590454	GGG
ATATTATCAAACGGAAACTT	chr10	+	393751	CGG
TAGTACAAAAGAATCCAGCC	chr4	-	1493228	GGG
TAAGTTCGGTATTCCCTGTG	chr12	-	434679	AGG
TTCTAGGAATGCGTTTGATA	chr7	+	345602	TGG
AGAGTGTTCTCTTCAAAGTT	chr8	-	406909	CGG
ATGCTTAAGAAGATTAACAG	chr7	-	421024	TGG
GGCAATTTAACATTAATCTG	chr5	-	51631	AGG
TTTGAATAAGTCGCGTTATA	chr9	+	245865	AGG
AAAAAGTCTTGCTTTTTATG	chr7	-	545070	AGG
TATTATTTAAGGGAGTTAAA	chr16	-	729593	TGG
AGACGATAGAGAATTGGAAA	chr11	-	639827	GGG
GAGAAAATTTAGGAAGTACA	chr7	+	667467	AGG
CCATCTCACTAAGAACGAAG	chr11	+	48077	AGG
CGGTTATTGGAATCTACAGG	chr14	+	307509	TGG
AAAGATAATGGGGAGAAAGG	chr5	-	322089	TGG
TTCAAAGGAGTCTTCAAAGG	chr2	-	352207	AGG
TATCATTACCCACCATTGCA	chr14	-	113052	AGG
ATAATATTCGCGGCAAAATG	chr5	+	15196	AGG
CCGCATTACGTACTGCGCTG	chr5	+	42783	CGG
CACGTAGTTTTTGCTCTTGG	chr10	-	137494	CGG
TTAGTTCTTTACCGCAACAT	chr14	-	585516	AGG
CTTTCGGTGCAAAACTGTGG	chr7	-	798333	AGG
GACATTTATTGTATGCACAA	chr14	-	52644	TGG
ACCCTGGTAACGGGTGACGT	chr16	-	740076	AGG
GTAACCCACGCTTACGATAT	chr5	-	303206	TGG
AAAAAAGGCTTCAATCTCAA	chr8	+	458957	CGG
ACGGTGAAATTGAGACTGAT	chr12	+	902583	AGG
TGGCATACCAAACAAGCTGA	chr14	-	674560	CGG
CGGAAAATATAGTGTTCCAT	chr7	+	269259	AGG
ATAGTAAAAGCATATCGAAA	chr15	+	1036835	TGG
AGACCCACCACAAGATAGAT	chr10	+	123050	TGG
TCAAAGGAGGCAAAATCAAG	chr11	-	137818	GGG
AAATCCTGTTAGGTTGCCAC	chr14	+	89512	TGG
CAAAATTCACGATGCCCTGA	chr15	-	922791	AGG
TTGGCGCGTTCCTCCTACGA	chr13	-	616320	AGG
GTGGATTGCGTGAGATTGTG	chr4	+	794274	TGG
ACTCGAGGCTCGTAACCATC	chr5	+	562611	AGG
GGACTACAACATATTTGAGG	chr4	+	1320086	CGG
AGTACCAAGACACCCGCACG	chr10	+	316762	TGG
CGCAATTGCAGATTTGCATA	chr4	+	304697	TGG
TAAAGTCGCATACGTACAAA	chr5	+	200955	AGG
TCGGCATTTCCCAACAGAAG	chr13	+	624378	CGG
CACAAGAGTTACAATGGGAG	chr13	+	654641	TGG
TATCAAGCTTCCAACTGGGT	chr15	+	803367	AGG
AATGTAAGGACAATGAGACA	chr15	+	757945	TGG
TCAAACGGTCGCGTGCTGAG	chr15	+	915293	CGG
CCAAGAATAATATTTAAATG	chr4	-	442761	AGG
AAACTCCAAGAAGGAGTTGA	chr13	+	165211	AGG
AATATTTCTTCGTCTAATAC	chr10	-	669234	TGG
TGACCGCAAGTCGTTAGCAG	chr5	+	68756	CGG
CGGAAACGCAATTGTTACAG	chr7	+	45526	TGG
TGTTTCCATTAGGCCCTGAG	chr4	+	1242265	CGG
ATCAAATAACTAATTCAAGA	chr12	+	282928	TGG
AAAAATGGTTTTGTAGGTCA	chr12	-	660721	CGG
AAGGCTAGATCGTTCTCTCA	chr12	+	568387	AGG
TTTAGTATGAGGTTACTGTG	chr15	-	553080	TGG
TTCTCAAAAAGAAGTAGTGA	chr9	+	39428	GGG
GGGACTCAAAAATCCCAAAC	chr3	+	147853	TGG
CAGAGTCCTCAATACAAATC	chr13	-	321217	GGG
GGAAGTTAAATGCTACTACC	chr16	-	85547	GGG
AAAACATATGCTGATTAAGA	chr2	-	620774	TGG
CTGGAGCAAAATCAAGACGG	chr14	-	591114	CGG
CTGAGAGTTATTCAAACCGA	chr15	-	204293	TGG
AGCAATTGAAGCTTTTTACG	chr14	-	357157	AGG
AATTTTTTGAGTATTTTCCA	chr7	+	806178	AGG
TTTCAACAGTACCTGAAACA	chr14	-	479639	TGG
TCAAGGGGTTGCATATAGGG	chr15	-	73650	GGG
GAAAAAGAGCAGTCGAAAGA	chr16	+	670804	AGG
GCGATGCAAAGAGTGACGAA	chr12	+	388189	AGG
AACAGAGCGTCACTGCTGGG	chr15	-	779684	GGG
CGGACAATGCCAATAAAGTT	chr15	-	892092	TGG
TCGCTACCCGGAAACGATAA	chr13	-	216280	AGG
AAACCCGCCCCCAAATGGCT	chr4	-	1183065	AGG
TGCACTCTCTGTTTAGCAAC	chr14	+	43426	TGG
GTGGGTTCTGCTGCTGCTCT	chr9	+	170007	CGG
TAACCATAATGCGCACAATG	chr4	+	1279436	CGG
GTTGCTAAGATTAATTGCTG	chr4	+	392617	CGG
TTCGTAGAAAATGTTGACAG	chr5	-	144104	AGG
TTCGATTGGAGAGCCTATCG	chr15	+	977865	AGG
ACTTGAGACGTAGATTCAAA	chr11	+	556851	GGG
TGAAAATATGAATCAAATAA	chr7	-	695006	GGG
AATTAATCTACTGCACAAGA	chr10	+	445874	AGG
TTTAAAATACAAATATGTAC	chr4	+	1451090	AGG
GAATCAATCAGCACAATCAG	chr4	+	591732	AGG
TCATAAATATTAATATCTAA	chr12	+	1030025	GGG
AGGTATATGTATTGATGGAA	chr10	+	134254	GGG
ACCGTCATGCTCTAATCGAT	chr4	-	329482	TGG
CTACTGTAGAATATACAGGT	chr2	-	657792	AGG
TTATCTCTGTCAGAACAGCG	chr4	+	653092	AGG
AGAGAACAATAGGGAAAGAG	chr13	-	775817	GGG
TTTCCGGAGCATCAAACCTG	chr11	-	578734	AGG
TGATGTTTATCAACCACCAA	chr16	+	576306	AGG
TGTCGATCCTGATTTTACCA	chr6	-	240183	GGG
ACTGCCTAGTTCCCAAGCGA	chr4	+	1500713	TGG
AAATATAAACAAATGAAAGC	chr15	-	426342	TGG
TTTGTATATAAACTCTAGAT	chr14	+	672186	AGG
ACAAAAGTATTCTGGAAAAA	chr11	-	455425	GGG
GTGCGATTATATAAAGACTG	chr6	-	76753	CGG
TTTAAAATTGTATAGTACAT	chr14	-	626139	AGG
CAACGGGTAACGGAATACAG	chr4	-	570445	AGG
AAGAAGACGAAACTCTTCCG	chr8	-	101808	TGG
AAAATGGAAGTGAAGGGCAA	chr10	+	449203	TGG
GACTGTTTGGAATACCCAAG	chr13	+	219121	AGG
AATTCTAACTTTAACAACGG	chr16	-	886313	CGG
TTTTTTCATTTACTTCCAGG	chr5	-	148075	CGG
ATGTTCATCACCTCCGCTAG	chr10	-	421766	TGG
CCGATATTTTCGCGGCGTCT	chr16	-	339665	CGG
GGCCTAAAAAGCATAATAGG	chr7	+	166916	TGG
CGTAGGGCCAATCACAAACG	chr14	-	531569	AGG
GGTAAGAAGACTGTTAAGAG	chr10	+	608726	AGG
CTCAGAACAAGCCTTAAGTG	chr5	-	460196	AGG
ATTATCAAATGGACGAATGT	chr14	+	672117	AGG
AGTACTGATATGTCCCTGAT	chr10	+	294969	TGG
CTATCTATAGCGGATGCAAG	chr4	+	1084617	TGG
TATATTCTAATTCTTCATTA	chr14	-	371740	AGG
GTTCAAGTGTCACAAATTAG	chr16	-	666194	TGG
AGCTCAATATTGTCATTACC	chr15	-	316331	CGG
AAAGCGAAGAAGCGAAGAAG	chr2	+	486849	AGG
ACTTGTTTTATAAAGTGAGA	chr3	-	155712	TGG
TACTGGACCATGATTATCCG	chr15	-	642751	CGG
AGACAACATTGATTGCTCTG	chr4	-	1238419	AGG
TTTGGGTTTTGGCTACCCGG	chr4	+	751469	AGG
ACCATCTTTAGTTTCAAGCG	chr16	-	88499	TGG
TGCAAGAAAGAACAAAGGCA	chr7	-	715533	AGG
TTGTCTTTTTTGGCCAGGAA	chr2	-	299753	GGG
TTCCCGGTTGCTAACTTCGC	chr13	+	424564	AGG
TACGCATACTCCCTTTGACG	chr16	-	623339	TGG
ACCTAGCGTTCCCTTTTCTG	chr7	+	605426	CGG
AAAGCGAGGCGCAGATCTCG	chr2	+	565077	TGG
GAGCTGTCGCTAGAACTAGT	chr2	+	315288	AGG
TTCAGACAAAAATTACCATG	chr7	+	842864	AGG
TAAGACTGTTTCTCTTCTCT	chr16	+	339869	TGG
GAGCTAACGCCTTTCGATTG	chr7	+	875050	CGG
ACACTATTCACTTCGGGTAA	chr14	+	485434	CGG
AGATGCAGAAAGAACTGACG	chr15	+	977940	AGG
TTTTCAAATTGCGAACTCTG	chr14	-	374946	TGG
ATGACACACCAGCTATGGTC	chr16	-	567369	TGG
CTAGGTATTATAGGTCTCTT	chr13	+	855167	TGG
CTTCGAGGCGAGACGAAGGA	chr6	-	184350	AGG
GTTGCGATGAGTAAAATGAA	chr5	+	234821	GGG
AACTATTACGCACATAAAGT	chr5	-	251487	AGG
CGATTGAAAACATTCAACAA	chr14	-	258504	AGG
ATATCTTACCAGTATAGTCA	chr1	-	36543	AGG
TTTAAAGAAGCGATGAGCTA	chr12	-	363932	AGG
CTTATATTCGTCATTCAAAA	chr6	-	241552	CGG
GTATGAAATACGTGATTACA	chr11	-	374010	AGG
TATTCCGCGGAAAGTCCGAG	chr2	-	217267	CGG
GTATATGAAAGCCTCATCCT	chr13	-	396467	CGG
TGCTTACTGCAATTAGCTAA	chr4	-	574091	TGG
ATGATATGACTATTGAGACC	chr7	-	452163	TGG
CATGAAGATGGTCCCCATCA	chr6	+	196214	GGG
TTGATTTTGCAAGCAAAGCT	chr3	-	40917	GGG
ATATGGAAATTTTCTCGAGC	chr14	+	68612	CGG
CGACCCCTTATTTAGTCGAA	chr8	+	280637	GGG
AGAAATAATGTCACGTCCTG	chr3	-	211530	AGG
AGCCTCGCAACAAACCAAGA	chr4	+	892620	TGG
TCTTTCTCAAACTTAATATT	chr15	-	467750	TGG
CTTCCTCTAATAATAAGAGG	chr8	-	357515	AGG
GTATTCATTATACGATTATT	chr15	-	304631	AGG
GTGATACAAATATAAAACGC	chr9	+	350192	CGG
TTTTAGTTGAGTGTAGATCG	chr10	+	291485	AGG
TACTATTTAACATGGATGAG	chr4	+	428886	AGG
ACAATTTGACCTTTATTACA	chr5	-	214800	AGG
AGAAGTCTGTCTGCTTGGCC	chr16	+	370545	TGG
GTTACAGGTTCTGCTAACAA	chr16	-	241931	CGG
TATACTAAATGTTTGGCGAG	chr9	-	357560	AGG
TTGGTTTTCAGTTAAGAAAT	chr15	+	780659	TGG
AAGGGAACTTCCTCACACCG	chr7	+	281402	CGG
GATTGTCCCCTTAAGCGAAC	chr7	-	886090	TGG
CATTGTTAGTTTGTAGCTGG	chr13	+	262703	TGG
AGTTGTGTTATATAATCCAG	chr16	+	588556	GGG
AATTTATGTAGCTATTTTAT	chr4	+	791870	TGG
TCTGCCACACATATCGTGAA	chr2	+	707326	AGG
CTGGCAAGTCCTGTTCTGTG	chr10	-	703203	TGG
ACACAAACAGCGGAGAAGTG	chr7	-	197635	TGG
TTTGCTTGAAAGTTTGCTTG	chr15	+	1028838	CGG
TTTGTAAATGCAATTTTGTG	chr13	-	497574	AGG
TGATCAAAGGGGCAAAACGT	chr13	-	874898	AGG
AAAATTTTTGCGATGAGCAT	chr14	+	723297	CGG
TCGTCATTAGCGTCTCGTAG	chr16	-	132591	TGG
ATGAGCGAAAACGCTCTCGC	chr7	-	667876	CGG
ATCGCCAGTGAAAGACAACG	chr2	-	734890	TGG
TCCTAAAATAAGTGCTCTCA	chr3	-	264711	TGG
GTATGCCTAAAACGAAGCAT	chr5	+	135565	TGG
AGTAAAGTGGAGCAGTAGAG	chr8	-	242209	TGG
CAAGGCCGCGAAAATAACAA	chr4	-	478850	AGG
TATTTAATATTTGCGACGAA	chr14	-	218768	GGG
CCGCCAAAACACCGGTCGAA	chr10	-	265651	CGG
GCACAATCTATTGCTTAAGT	chr8	-	181745	AGG
GCATGAGTTACGTCAATCTC	chr1	+	29971	TGG
AAGAACCAATTAAACACTGG	chr8	-	371557	AGG
CGGTAAGAAAAACCGACGCG	chr14	-	456235	TGG
CATGGTTTCAGAAAGCAGAG	chr12	+	830531	CGG
AGGGCTATTTATGATGAAAG	chr11	-	639808	TGG
ACTTTCTGATATAAAGAAGC	chr8	+	39990	TGG
CAAAGACGAAGATCTGTGGG	chr7	+	524658	AGG
AACGCTACCACTGACCAAGA	chr15	-	1017899	GGG
AACTTCCACTTTATTCAGTC	chr15	+	316332	CGG
AAATAATCATACTCAAACAA	chr5	-	325822	AGG
TAAGGTAAATAAATCCTGCG	chr13	+	568503	CGG
GGGCTGCAAGTATTACGTAA	chr13	+	449117	GGG
GGTATTTTGATATATGTGAG	chr13	+	146408	TGG
TTATATCAAAAGTTCATCTG	chr4	-	1484094	AGG
TACATACCGACATTTACCGA	chr4	-	1233957	AGG
ACAATGCGGCTCTTTTGCAA	chr16	-	355287	AGG
AAGTCACGTATATAAGCTAG	chr6	+	210552	TGG
TGTTATACACCTGGATCTGG	chr16	+	128362	AGG
AAAGCGATGCTCAAGCCAAT	chr15	+	310377	TGG
GATTTGGACAACTAAGGCAG	chr4	-	1140498	CGG
AACGTATGTTTCATTGATAA	chr14	+	622962	GGG
TACGGTTCTTATAAAGGGTA	chr7	+	677412	CGG
GATTTCTGATAAAAATAAAA	chr16	-	381471	CGG
GTCATCTTCTAAGCAAAAAT	chr13	+	282849	AGG
TTCACTCTGGTAGTGTGCAT	chr2	-	735572	CGG
CGATATTCAGCTAGAGTCAG	chr10	+	457701	CGG
CAAGCATTTTTCACGTAGAG	chr6	+	95197	AGG
TGGGATACAGACGCACATCA	chr9	-	268307	TGG
CCAATAAGTTCATATAGCTT	chr5	+	106777	GGG
TTATTTTTCACCACAATAGG	chr7	-	894569	TGG
AGATTGGATATCCCTACAGG	chr8	+	327998	AGG
GGATATATTTTGAGGGAAGG	chr10	+	604543	GGG
AGAGCTCTTCTAAAGACAGC	chr1	+	92939	GGG
GAAATGGAAAAAACTAGATC	chr9	-	180038	CGG
AGGTCGAATAAATTGTTCTC	chr8	+	230706	CGG
ATTCAAGCAATATGCTTGTG	chr14	-	427472	TGG
GCCGGTCTACAGAACTCACA	chr16	+	713260	AGG
GACCAAATAACCAAATTTAA	chr4	-	62150	GGG
GGCTCTTATACAGCAAAACT	chr6	-	226584	AGG
CAACACTATAATATCTGAGT	chr15	-	1000726	TGG
TTCCTCAGAGATCTCCATTC	chr14	-	485153	TGG
TGTGCTTTGTTTTCTAGTAG	chr4	+	30731	GGG
AGATAAGAAGCTTTTAATCA	chr13	+	674926	AGG
TCAGTATTCCTTTAATGTCA	chr2	-	87714	AGG
CACAGCCAATTTCTCTGAAC	chr4	-	442252	GGG
TCGGGCTGGAGTGGTAAGTA	chr7	+	306149	CGG
AAAGCAGACACCAAATAAGA	chr8	-	164627	AGG
ACTTTTCCAACTTACAAAAG	chr7	+	375962	CGG
GTGACTGACAACAGATATGT	chr16	+	792746	GGG
AATATGATCTTATTTTGACA	chr16	+	246394	TGG
CTGGCAGGTATTTTTTGGAG	chr14	+	383831	CGG
CTGTTCACTTCGATGTCATC	chr10	+	60789	CGG
CTAACCTATCCGAACGACGC	chr4	-	1022688	AGG
ATCGATTTTCTCAGGAAAGA	chr10	+	205211	CGG
TGAAGAAGGCCAGAAACAAT	chr2	-	447285	TGG
TCTTTAAATACGATATATAT	chr15	+	416123	GGG
CCTTATCTTAGTGACAGGCA	chr15	-	520526	AGG
AATATATGTGTAAAAAATGG	chr14	+	637225	TGG
TTTATTTGGTTTATACCAAG	chr10	+	109651	GGG
ACTTAGCGGGGTCATAACGA	chr16	-	878842	TGG
AGCCAAACCGAAGTCAATTG	chr15	-	515174	TGG
ATGCCTTTTTGTATACGGTG	chr13	+	795654	CGG
GCCTCACAATACCCCAGCAT	chr11	-	526559	CGG
GTTTATAGTTGAATTTTGGG	chr16	+	797144	AGG
ATCATGCTAGACAAATAACG	chr11	-	428897	TGG
CCACCGCTACCATACAGTCA	chr9	-	241650	AGG
CGCGGCTGGATGTCTTTTAG	chr14	+	605994	GGG
TCGGCCATTCCTGAATGGAC	chr12	-	723614	GGG
ATTGCGATGTATGCTGACAT	chr4	-	1298429	AGG
CTCCGGGTTTCTACTTTCAT	chr14	-	663707	TGG
ATGCCTTTTTCAAATATACG	chr5	+	320149	TGG
ATACTTAACTTTGGCAAATG	chr4	+	1166287	AGG
CTCGTTACAGTTCTATCTTG	chr16	+	299547	AGG
TGAATTTCTAAGTTCATGAG	chr4	+	1018964	GGG
TCCAACTTTTGGTACGACTG	chr10	+	100829	AGG
ACATTGGACGCGAGGTACCG	chr9	-	244775	TGG
TTAAAAACAAACAAAAGCAA	chr16	+	49215	AGG
AGAGATCGTGACACTGCTGA	chr1	-	189845	TGG
TGTCTCTCTATCATGACACA	chr10	-	496740	GGG
GATGACCAGCTATCTCACGT	chr1	-	184682	TGG
TGCCCATAAGATATAAGGAA	chr16	+	818256	AGG
CTGAAGATGAGGGTAAATAG	chr4	+	217485	AGG
CATAACCAAGAAAAAAGTAA	chr11	-	230236	GGG
TTATCCTGACGCCGTCACAA	chr10	+	471818	AGG
TCCAGTATATATAGGATGCC	chr4	+	1103287	AGG
GAATTTTATGAGAACCATCG	chr7	-	687999	AGG
CCTACATGAAAAACAAAACC	chr6	+	246048	AGG
GCTTCCAATGATTCCAGCAA	chr14	+	701593	CGG
TTACCAGATTTGCGGTTGGG	chr3	-	133447	CGG
TTCGCGTTTTGATGAAGCAC	chr12	+	809516	AGG
AAACATCAAGAAAGATTGAG	chr11	+	307942	GGG
CAACTTGCGCATCAACGTCT	chr10	+	587177	TGG
GCCAGCTGAATATCTTGCAG	chr14	-	148249	TGG
AATGAGGTAATTCAGCTGGA	chr15	-	702397	TGG
GCAAATAGGGTTCAGCATTA	chr1	+	33034	CGG
AAAAAATAGAAATGCGCGGA	chr2	-	576290	AGG
ACTTGTTGATGTTAATGAGG	chr10	-	319304	CGG
ACTAGCTAGTACCCGCCCCG	chr9	+	117825	TGG
GTAGAATCATGCAAAGTAGC	chr15	-	551117	AGG
TTATGATGAGATGTCCAATA	chr5	-	535946	AGG
ACACGACTTTAGCGTCTCAG	chr15	-	323208	AGG
CAATATCCCTATTGACGACA	chr14	-	476757	TGG
ATTATATAGATTCAGGTGCA	chr7	-	605866	AGG
AAACCCTTGAATAGCACCAG	chr13	-	133066	AGG
AGTAATCATGACTCAGTCTC	chr14	+	51841	TGG
TATTTTGACGCCGTAATCGA	chr14	-	44338	AGG
ACATGCTGTAACCTAACCTA	chr12	-	990430	AGG
TATCTTTAGAAGCAAAGCTG	chr8	-	10547	TGG
ACCAGAGGAAGCTTCCCAGG	chr16	+	40592	CGG
ACATTACCATAAAAACCAAG	chr4	-	1140607	AGG
ATAATAAAGGAAAATTATAG	chr7	+	257399	AGG
AAATAACAATACAAATGCAG	chr16	+	337374	AGG
TTGCAGTCTGCTGATGCTGC	chr6	+	164725	AGG
CGTGTCTGCTCCTCCCACAC	chr4	-	340713	TGG
TCTGAGAGGGCTCAAAACAA	chr12	-	893171	TGG
ACAGTTCCTTCAAATATGCT	chr12	-	177683	CGG
ATCTGGAGTATACATAATGT	chr4	-	1318012	TGG
AGATTACTTTAAAAGGGGGA	chr12	-	849566	GGG
CTGCAAAATATATACTGGCT	chr6	+	110161	TGG
GCAGTACCCAGATCCGGAAC	chr7	-	74444	TGG
GATTAAACCGGTTAACATCA	chr5	+	86164	TGG
AAATGTTTTTAATTTTACGT	chr2	+	784652	TGG
GATTAATAACTTTTGAAGAA	chr7	+	506793	TGG
TTTTGGAAAAGCATTCGCCG	chr10	+	227394	AGG
TTTGCTTTAAAATTCAAACG	chr7	-	627720	TGG
TCATGACCTGAGTGTCCCGG	chr8	-	393611	TGG
AAATACTGGCAAATCTTCTC	chr14	-	471050	GGG
TTTTTTGATTTCTTATCTGA	chr5	-	13556	AGG
AAGAGGTATCCGAAACAAGA	chr16	+	698718	AGG
TATGCTAGTTTAAGCCCAAG	chr5	-	490903	CGG
GCATATTAATATATTGCAGA	chr12	+	937536	AGG
[truncated: 38,893 more rows]

## Sheet: Activation_screen_low_coverage
Guide	Gene	logFC	logCPM	LR	PValue	FDR	Library
AATATTATATCAACTTAAGG	YNL313C	15.5489751003377	12.478697442178	7.8217908845058	0.00516200201857899	0.070519236963026	Activation
ATGGTCCAAACCTAAGGTTA	YDR428C	14.8631903046714	10.222347555631	7.8379281855315	0.00511612099245314	0.070519236963026	Activation
GGAGGATATAACACAAACAG	snR63	14.7169172167785	11.6451754702313	7.21039358604718	0.00724825978688303	0.070519236963026	Activation
ACATACAGTGTATATATTTG	YJL014W	14.6466183422216	13.6500461170476	6.82905739690976	0.00896865836833468	0.070519236963026	Activation
GCAGAACTAGAATGCGTGAG	YKR013W	14.5475081872667	12.1689757117933	7.01957089951602	0.00806235495886282	0.070519236963026	Activation
GTGGGGTCCGCGAAAATTTC	YGR289C	14.4836461286413	9.84360847152291	7.7634054249175	0.00533153436784074	0.070519236963026	Activation
GAGAATATTAGGAACAGATG	YGL246C	14.2542652113346	9.61298521169788	7.30432632827149	0.00687887820883914	0.070519236963026	Activation
GGGACAAATAATGAACAGAG	SUT784	13.6817406798526	12.3808702452104	6.39799925418654	0.0114249046763517	0.070519236963026	Activation
TCGTGAAATGCACTTCAAGG	YPR148C	13.5717272381853	8.9326379403848	7.68960360710904	0.00555398247364969	0.070519236963026	Activation
GTCTAATAAATTTGCAAATT	CUT832	13.1184502003426	11.5428077682523	6.27354804841348	0.0122553499125106	0.070519236963026	Activation
AGTTCTTCATTTGGCTGTGG	YGR010W	13.1155378138869	10.0511339074916	6.89738599789877	0.00863218744028743	0.070519236963026	Activation
AAAAAATCGGGAAAATACCT	YNR006W	12.9627583914419	11.1268122259574	6.57815714559835	0.0103237721709266	0.070519236963026	Activation
AATTTTAAGAAATAACAACG	YDR479C	12.4772979975474	7.83698639018494	7.86764132302687	0.00503272572726567	0.070519236963026	Activation
GGGAAGTTAACTGAGTATAT	YLR446W	12.368966840029	11.567497923557	6.32647391877989	0.0118948583776956	0.070519236963026	Activation
GGTGAGAATGCGAAATGGCG	YEL064C	10.9649002550002	9.12586703255936	6.1169234369914	0.0133893635470708	0.070519236963026	Activation
GGCTACCAACAATACGACTG	YER004W	-9.99957685513451	5.42150581380744	6.73165628126947	0.00947166107128608	0.070519236963026	Activation
GGTTATACATAGAAACGTAT	YGL229C	-9.99210414721966	5.41439500718065	6.49065244807683	0.0108443169783408	0.070519236963026	Activation
AATCACGCTGGAAGGAGAAG	YKR086W	-9.99010595469328	5.41219448205535	6.25678836009641	0.0123718288551898	0.070519236963026	Activation
CGTGACATGGAGCTTTTGGT	CUT345	-9.97188434870551	5.39490952919648	6.6194298367523	0.0100872121460164	0.070519236963026	Activation
ACAATTCTCCGGCATACGGG	YMR003W	-9.97110411349447	5.39412992955406	6.5668069543794	0.0103898191558995	0.070519236963026	Activation
CGGGATCAGGACCAAGAACA	SUT495	-9.96988162376724	5.39299193838547	6.74854576502912	0.00938241262675088	0.070519236963026	Activation
GTCATGGCAAGAAAAATATG	YIL138C	-9.96448493579453	5.38759461853265	6.10620193711269	0.0134708304548184	0.070519236963026	Activation
CGAAAAATCTAGCACGTGGG	SUT317	-9.95946405181791	5.38322943511314	6.26370739316456	0.0123236047191788	0.070519236963026	Activation
TGGCTAGCACAATATTTGGG	YGR205W	-9.95896195757894	5.38240920356883	6.35478022921469	0.0117065443859835	0.070519236963026	Activation
GGAAGGGTTTAAGGTGAAGG	YDL052C	-9.94842839708866	5.37234338599458	6.40329801549264	0.01139085684829	0.070519236963026	Activation
GAGTTAAAGATCCTGTGTTG	YKL068W	-9.93780213044675	5.36231580068138	6.67139109185502	0.00979726892057688	0.070519236963026	Activation
CGCTAAGATTCCCCTTTCGG	CUT620	-9.93736930008739	5.36185355727303	6.62202932301021	0.010072500151736	0.070519236963026	Activation
AAATTGAGTTATTTATACAG	YDR405W	-9.93219047894104	5.35702820397999	6.50869574311843	0.0107348215820632	0.070519236963026	Activation
AAATCGGGAGCGGTTAGCGC	YDR413C	-9.91674851813607	5.34205511272857	6.42639446491803	0.0112436597186096	0.070519236963026	Activation
GCTTTTATGTCAACTCAGAG	YMR244C-A	-9.90412375884932	5.33003195049776	6.68568718590919	0.00971900499259322	0.070519236963026	Activation
AAAAAGACTTTAGAAATAAA	YLR227C	-9.89749543339784	5.32378287442807	6.6857621868322	0.00971859609386456	0.070519236963026	Activation
AGGAGTAAATCTTTGTTCTG	YBR046C	-9.88242070205953	5.30940315318656	6.62726847223566	0.0100429155762989	0.070519236963026	Activation
AGAATGTTGCAGTTGCGGAG	YDR201W	-9.86962502616921	5.29711546162377	6.68506762308545	0.00972238347137676	0.070519236963026	Activation
ATTTCAGATCGTTAGAAACG	YIL143C	-9.84873265576072	5.27727359055382	6.57221526013501	0.0103582942537751	0.070519236963026	Activation
GTCGAAGAACATCTCAGAGT	YDR128W	-9.84755290861584	5.27603011909797	6.6296652637715	0.0100294110135635	0.070519236963026	Activation
AGCAGTAGTATCAGGATAGC	YJL092W	-9.84612620985923	5.27463276298531	6.51625636144232	0.0106892778662933	0.070519236963026	Activation
GATGAACTGTAACAGAAAAT	YGL223C	-9.84091122737417	5.26977756995387	6.62680241240956	0.0100455437231439	0.070519236963026	Activation
CCGGTAGTAAAGTAAGCTGG	YDL055C	-9.82083358705079	5.25057994798103	6.73097791296195	0.00947526385887726	0.070519236963026	Activation
AACAAATGGCAAATAATACG	YHR003C	-9.81953669913571	5.2493205907252	6.68394713259186	0.00972849656732251	0.070519236963026	Activation
GGGGCGGGGTAAATTGCGCA	SUT454	-9.80101108487781	5.23169280047354	6.72112436357968	0.00952775425287039	0.070519236963026	Activation
TAATTTAAAAGTTAGTGTAG	YLR363C	-9.800628366213	5.23129879965776	6.64278310341524	0.00995582840949167	0.070519236963026	Activation
AATTTTTCAGAAATGGTGCA	YCL037C	-9.80044005686609	5.2311209013845	6.64283261536991	0.00995555173004805	0.070519236963026	Activation
CCGTTTGAGAACGACTGCCG	SUT411	-9.80001722443352	5.23084261794807	6.41313460977287	0.0113279264677815	0.070519236963026	Activation
CGAAGTTTTAGAAGTTGATT	YPR190C	-9.79513766360548	5.22610684069912	7.33359321114022	0.00676776259610161	0.070519236963026	Activation
ATTACTGGGTATCCTAGATC	YDR124W	-9.78050931701634	5.21223718136665	6.4613357981815	0.0110246736840984	0.070519236963026	Activation
ATGCTATTTATTTATTTTGT	YNL144C	-9.77438868584508	5.2062858648606	6.55267512862019	0.010472658483622	0.070519236963026	Activation
CAACTGTCCCAGATGTTGGA	YPL041C	-9.76649146963923	5.19880110378816	6.67013320702248	0.00980418604571108	0.070519236963026	Activation
AAATGTAAACTAAAAAATAT	YDR506C	-9.75919375220621	5.1919341425661	6.53808447102892	0.0105588982687736	0.070519236963026	Activation
CATATAAATATAAATATCTA	YML112W	-9.74999256635743	5.18325056065251	6.2881798687788	0.0121545807140153	0.070519236963026	Activation
ATTAAGTCTATAAACGCTTT	YER128W	-9.74810885712654	5.18133128874928	6.67742461107591	0.00976415997340536	0.070519236963026	Activation
ATGGTAATAACAAAAAAGAT	YHRWtau3	-9.74319308870147	5.17651209171981	6.31044195844563	0.0120028915318066	0.070519236963026	Activation
AGGTTCTGGTAATTCTGGCG	YNL040W	-9.73770410027754	5.17150445366926	6.43233719381495	0.0112061025290956	0.070519236963026	Activation
AGTTAAAGCGATATAGAAGC	CUT418	-9.73551897236892	5.16921797273421	6.30481198717437	0.012041068342928	0.070519236963026	Activation
AAAATTCAAAACAACTGAAG	CUT290	-9.72954919023755	5.16366219637863	6.67968525033156	0.00975178425741299	0.070519236963026	Activation
CTCCCATTAAGGAAATCGGC	YJR149W	-9.71980057293124	5.15436409098888	6.54265799562335	0.010531787836219	0.070519236963026	Activation
GCACCAAATATGTCCCAACG	YNL320W	-9.71787395769441	5.15257031309721	6.71042853278645	0.00958506879847243	0.070519236963026	Activation
ATCATATTTGACGATCGTGT	YNL084C	-9.69322162243964	5.12917976080854	6.56661021930145	0.0103909677731754	0.070519236963026	Activation
AAATTATATTTCAAGCATGG	YGR056W	-9.68612293018744	5.12240667025893	6.66615445830653	0.00982609820418442	0.070519236963026	Activation
ACCTTGGGGACTTTTGACGT	YDL239C	-9.68461611158706	5.12097502031388	6.72145060271114	0.00952601160014288	0.070519236963026	Activation
TTTTTCTGGCATTTAATTCT	SUT275	-9.68249809837308	5.11897009750175	6.74556594842863	0.00939809594441715	0.070519236963026	Activation
TGGCACGACCCCTTGCAGGT	YJR058C	-9.6729958833667	5.10997510002275	6.92221626315014	0.00851314051819327	0.070519236963026	Activation
CAGTGGTATTAGATTTGTCA	YGR123C	-9.66097429220846	5.09849439774186	6.47128799711864	0.0109631050354834	0.070519236963026	Activation
GAGAAATATGCCAGTAACAG	YKL198C	-9.65874383039792	5.09647289540442	6.47170354714508	0.0109605419470336	0.070519236963026	Activation
GGACTTGCGTGGTCGCTCAC	YJR084W	-9.65521038660611	5.09308590461586	6.58707141526378	0.010272201759743	0.070519236963026	Activation
CATTTCCTGATATTAGCATT	SUT414	-9.65397284330939	5.09184437292839	7.05055911399341	0.00792405137061075	0.070519236963026	Activation
GTGTTTTGTTTCCTACTTGG	YDL158C	-9.65301101382486	5.09098439775328	6.77759873893938	0.0092308991148787	0.070519236963026	Activation
AGTCTTAGCTGTAGTTGATG	YNL036W	-9.65115541000008	5.08921357631445	6.57478696408748	0.0103433382667747	0.070519236963026	Activation
GGAACGTAATGACTTAGAGT	YIL097W	-9.64748148833636	5.08580459238794	6.42066717301215	0.0112799776153265	0.070519236963026	Activation
GAAGCCAGACAGGAGAAATC	YNL026W	-9.6399644798448	5.07862318885712	6.79524711919143	0.00914008709014578	0.070519236963026	Activation
GAAAGGAGAGAAATTAAACT	YLR167W	-9.63761053516126	5.0763978313195	6.77501077277237	0.00924429330178987	0.070519236963026	Activation
CAAAAAAGCATATGCGACTC	YMR212C	-9.63362779153637	5.07253109277869	7.2277423532947	0.00717854269769049	0.070519236963026	Activation
GTGTACCGTTATCTAAAGTG	YER100W	-9.6298053499449	5.06899341469099	6.58462500900204	0.0102863282428853	0.070519236963026	Activation
AGAAGAAATGAAGCTAGTAT	YHR128W	-9.62960041933478	5.06879964966434	6.58337528520312	0.0102935523093581	0.070519236963026	Activation
GGTAGAAGATGACTATGATG	YKL010C	-9.62224600821103	5.06184657932809	6.7029798600736	0.00962519170744879	0.070519236963026	Activation
GATTCTATTTCTCATTTATT	YPL051W	-9.61392826865225	5.05393069877067	6.818265070781	0.00902301817490888	0.070519236963026	Activation
AATGTCAAGCCTGTTTTATG	CUT407	-9.6090355263188	5.04933421812898	6.79641493577963	0.00913411030738824	0.070519236963026	Activation
AAAATTTGAGTCACCAAAGT	YLR253W	-9.60690729023231	5.04731427962927	6.80767042861992	0.00907671044079791	0.070519236963026	Activation
GACATTCTTCAAAATCAACA	YGR121C	-9.6013518918359	5.04210054302674	6.86925181159535	0.00876913573178978	0.070519236963026	Activation
GCCTTAGGCGTTAAATTGAG	CUT866	-9.60049745020599	5.04119035784993	6.43936974388094	0.0111618240892314	0.070519236963026	Activation
AGGAAGTCTTCGATAGAGTG	YJR139C	-9.59118187329431	5.03237845350092	6.69107189774854	0.00968969274682573	0.070519236963026	Activation
GTATCTTCGTCGCTAGAGTC	YKL051W	-9.58612909700409	5.02763739158753	7.1038107042729	0.00769202442568546	0.070519236963026	Activation
CGATTACGCTGCAATGTTGG	YLR348C	-9.5860314532829	5.02757172158939	6.90181711781653	0.00861081853660252	0.070519236963026	Activation
AAAAACACCATAATAATCCG	YOL159C-A	-9.58294875498359	5.02459735830148	6.88514929843343	0.00869148078660297	0.070519236963026	Activation
CAGTTTATCTACACAACGTG	YBL036C	-9.57215897513466	5.01449210283782	6.75865030105068	0.00932942990215471	0.070519236963026	Activation
AAGCCTGTGACGTACTTATG	SUT276	-9.56840718615361	5.01083772255134	7.11102904373062	0.00766111185790745	0.070519236963026	Activation
AAAAATATTAGCCCTGTAGG	YJL011C	-9.55423051451258	4.99752202100623	6.70919735909317	0.00959168878075829	0.070519236963026	Activation
CAGTTCTGATTAAACACGCG	YDR217C	-9.55046249216357	4.99384626555964	6.9924423232255	0.00818545870656724	0.070519236963026	Activation
TATGATTGTACGTTTGTACG	YCL010C	-9.54862817343485	4.9922040671705	7.00873464512114	0.00811129884400329	0.070519236963026	Activation
AGCATACTAAGCGCTTTCCA	CUT865	-9.5435012722577	4.98723345314791	6.78052891050954	0.00921575781008728	0.070519236963026	Activation
GTAATGCGAACCTCCAACGT	SUT134	-9.53668516324944	4.9809241053006	7.04695112288168	0.00794002860720537	0.070519236963026	Activation
GTTATCAAATATATATTTTT	SUT769	-9.53506099195488	4.97925982968726	6.89639995523913	0.00863694997058803	0.070519236963026	Activation
GGTTTATCCGAGACGACGTG	SUT535	-9.52562575040326	4.97045608314974	7.07665782864655	0.00780945340075263	0.070519236963026	Activation
AATTCCACGTCTTATCACCG	SUT329	-9.52366518776684	4.96865310585819	7.03024399621559	0.00801444325345686	0.070519236963026	Activation
TGTAAAGATGGTATATTCAG	SUT413	-9.51553322259815	4.96093953722821	7.08699747153756	0.00776452259130021	0.070519236963026	Activation
ATGTCTTTTGTCATTATCAC	snR78	-9.50891194917538	4.95457737494368	6.69599699701611	0.00966296176472113	0.070519236963026	Activation
TGCCCATTGCATAAGCTGCT	YNL048W	-9.50649397118793	4.95250355226397	6.96720331918257	0.00830171452470207	0.070519236963026	Activation
GGAGACTAGCCAAAGAGAGC	YDL214C	-9.50427275008126	4.950213879628	7.0911178765083	0.0077466911478084	0.070519236963026	Activation
GACAACAGGTCACTTCTGCA	YMR284W	-9.49012760370674	4.93683590423226	6.75045591518042	0.0093723732608655	0.070519236963026	Activation
CCACAGCTGAAAGATCTAAC	YNL188W	-9.4798165272332	4.92710243341956	6.7870694309416	0.00918205214730999	0.070519236963026	Activation
CACGATCGTCCGGAAGATGG	YNL237W	-9.47508262631668	4.92262815097621	6.86774709579706	0.00877652255866444	0.070519236963026	Activation
AGGATGGTTCCGAATTTCGT	YKL125W	-9.47485812880903	4.92241934228023	6.83731263168911	0.00892730403246665	0.070519236963026	Activation
AGAATTAATCAACGTTGCCT	YLR248W	-9.46180805016138	4.91016654298289	7.12669757551796	0.00759444760693769	0.070519236963026	Activation
ATCCATAAAATCAAGATATT	SUT278	-9.45675356366602	4.9056216908424	6.72881973851397	0.00948673517931289	0.070519236963026	Activation
AAATTATAAAGAAAAGAAAT	YGL231C	-9.44937380872247	4.89864040110839	7.11483208784308	0.00764487642084737	0.070519236963026	Activation
GATTTATGAGCAAAACAAGT	YIL061C	-9.44317052153427	4.89289268074964	7.28563603066848	0.00695081172034404	0.070519236963026	Activation
GGATCGTTTCAAACGGATGT	YLR292C	-9.44127395085464	4.89088415151544	7.15438014789692	0.00747811342361485	0.070519236963026	Activation
TATTAAGACAAATTTGTTTG	CUT258	-9.40795959701584	4.85979323619827	7.33220903206924	0.00677297628597612	0.070519236963026	Activation
ACCACAATGAGGTCTTCCAG	YGR186W	-9.39659871998536	4.8489815175115	7.39693587846442	0.00653350728460335	0.070519236963026	Activation
GCCTCAAAAGGAAACTTGTG	YLR121C	-9.39262606852302	4.84532811734413	7.12521531415285	0.00760072864615695	0.070519236963026	Activation
GCAAAAAGCTTGTTGATGTC	YBR252W	-9.38117257355758	4.83433356176557	7.20439493547655	0.00727252638678104	0.070519236963026	Activation
ATATTTTTAATACTAGGATA	YNL119W	-9.35158279130779	4.8068950165714	7.12413120091487	0.00760532590655667	0.070519236963026	Activation
GGAATTAGCGCAGTGATTAT	YIL155C	-9.34753544002315	4.80297732100545	7.23344183260368	0.00715578882159533	0.070519236963026	Activation
AAGAGATTATGTAAAATTGT	YKR023W	-9.34006342318241	4.79585350235759	7.6933885023051	0.00554234733799124	0.070519236963026	Activation
TCTCAGGGTGAAGTGACCGG	CUT839	-9.32964397340892	4.78633474224014	6.84802828205726	0.00887391531569762	0.070519236963026	Activation
GCAGCAGCCGCACCCCAATG	YNR028W	-9.32813519210727	4.7842980370379	7.36833424641766	0.00663823973214469	0.070519236963026	Activation
GAGAACTAATGGAAACCGGC	YNL101W	-9.31423609283705	4.77126972067845	7.33708212048258	0.00675463934517811	0.070519236963026	Activation
ATGACCAGTGGCTGAAAAGT	YBR274W	-9.30591290729726	4.76399765917218	7.33741187162956	0.0067534003578335	0.070519236963026	Activation
AAGCACTACGTAGATCAGCC	SUT613	-9.26950216094178	4.72974949269215	7.47588985760886	0.00625306524346605	0.070519236963026	Activation
CGGCCCGAGGTCCGACATCG	YPR002W	-9.26614681812024	4.72630798395204	7.22390072026064	0.0071939212412179	0.070519236963026	Activation
ACCTATTCGAGGTAAAGACC	YGL101W	-9.26134865276356	4.72262355177219	7.45719089368882	0.00631835294043428	0.070519236963026	Activation
AAAAAATAAATGAAGGAAAA	YOR159C	-9.24803526698478	4.709860108295	7.56681255664841	0.00594528331675831	0.070519236963026	Activation
CACCAACGCACAGCCTACAC	YFR015C	-9.24553322573556	4.70786594386643	7.24007809359234	0.00712938789037179	0.070519236963026	Activation
AGTGAACTTTAATGAAAATG	CUT077	-9.24541763638	4.70734231990428	7.5034106801396	0.00615822594359169	0.070519236963026	Activation
GAAGAACGTCTTGCCTAGTG	YLR052W	-9.24464880317509	4.70693801213139	7.20222501538665	0.00728132489200298	0.070519236963026	Activation
ACGTTGGATTTAGAACTTTG	SUT581	-9.23944614256261	4.70133936465228	7.3032736920268	0.00688290921939124	0.070519236963026	Activation
GAGAGAGGACTTTGAAAATG	YOR195W	-9.22788549102717	4.69131352789927	7.19413067748321	0.00731424157359723	0.070519236963026	Activation
AGGGCGTAACGGCCGTGATG	YNR017W	-9.19882163401986	4.66425229354454	7.64830584906456	0.0056825662615513	0.070519236963026	Activation
TCTATTGAATCTTCTTAATC	YGR015C	-9.18456901233736	4.65076993173302	7.55737583207688	0.00597649541350702	0.070519236963026	Activation
GAAAAAATAAACGTGCGTCG	CUT747	-9.18456462796988	4.65076993173302	7.58216000033264	0.00589487616849391	0.070519236963026	Activation
ATTAGATAATGAATTAATAC	YDR524C	-9.17138732010585	4.63812944873401	7.8167179203962	0.00517651176478236	0.070519236963026	Activation
GCAATTCTGAATCTCTTTAT	YNL161W	-9.16764359048083	4.6347706014096	7.64968751755108	0.00567821562136331	0.070519236963026	Activation
CAGAATCGCAATAGTCGGGC	YHL007C	-9.14377912844049	4.61228127860201	7.61370792191069	0.00579262492782298	0.070519236963026	Activation
GAAATAATGTCAGCAAACAG	YPL132W	-9.12788246611785	4.59825861648615	7.49592996906297	0.00618385894586925	0.070519236963026	Activation
GAAATAGCAACGCTTCATGG	YPL119C-A	-9.12720624503908	4.59774574479298	7.21954014362511	0.00721141797973044	0.070519236963026	Activation
GTTGCTGCAGAGGAAATCGG	YGR233C	-9.10340236862728	4.57563685259475	7.39623347382918	0.00653605900958859	0.070519236963026	Activation
GGTAAACTTTGGATCTGGGC	SUT564	-9.08948506389537	4.56146196216814	7.59571158330533	0.00585072987164969	0.070519236963026	Activation
CGGATTAAATCGTCGCAGCG	YBR188C	-9.06861173389449	4.54258092985526	7.77256228537966	0.00530457518409084	0.070519236963026	Activation
GGAAATAGTAGGGAGACACT	YDR258C	-9.06704343784775	4.54196411775541	7.98947696864651	0.00470500051737607	0.070519236963026	Activation
AGCAAGGGGGTTAACCACCA	YAL061W	-9.0669161020497	4.54058807044484	7.81247651069672	0.00518867499350836	0.070519236963026	Activation
GAACGATCCACGCTCAGATG	YKL206C	-9.05863768020673	4.53378546785383	7.72889282177753	0.00543440632339135	0.070519236963026	Activation
GAATCGTGCTTGGGGTGCTG	YJL099W	-9.05691530145376	4.53178405100163	7.72408367329384	0.00544890077236325	0.070519236963026	Activation
GGTTCGATAGCAATGCTGAG	YGL106W	-9.04965432844522	4.52592956949005	7.31136971500215	0.00685196793541709	0.070519236963026	Activation
GTCCCTTTATGATGTTTACT	YOR164C	-9.04744063585046	4.52255596767486	7.5105472825369	0.00613387311018943	0.070519236963026	Activation
AGATCCAGATACCTTTCATG	YHR124W	-9.03446230483643	4.51077705195568	7.71610355920492	0.00547303932530026	0.070519236963026	Activation
ATTTTCTAAATCATAACGCG	CUT555	-9.02067407354741	4.49770999770919	7.50057695645218	0.00616792304648954	0.070519236963026	Activation
GTCGTGTCGAGAAACTTGTG	SUT109	-9.01884566681479	4.49609897232844	7.61347459188809	0.00579337450365467	0.070519236963026	Activation
AGGAACAATACACGTAGAAG	YCL052C	-9.01386944315546	4.49268532164277	7.67970665149337	0.00558452454021554	0.070519236963026	Activation
ACATTTATCGAGCCAATCGA	CUT438	-8.99818680411518	4.47847228429906	7.41840457235747	0.00645600357673247	0.070519236963026	Activation
TGAAGTGGTACGGCGATGCG	CUT910	-8.98703044290629	4.46737889798089	7.85748273665891	0.00506108063623945	0.070519236963026	Activation
GAAAACAAAAGTTAATACAC	SUT228	-8.98657000709225	4.46620533306172	7.57027415848576	0.00593387575601006	0.070519236963026	Activation
ACACAGTAAGTGAGTATTTT	YGR019W	-8.97130732549355	4.45342508081099	7.73375904903981	0.00541977985400646	0.070519236963026	Activation
AACATCATCCTCTATGTAGG	YPR115W	-8.96294502580037	4.44554514317314	7.89963993612445	0.00494446387629002	0.070519236963026	Activation
GACTATCTCTTGACCCATGC	YBR147W	-8.95405479661862	4.43619958422815	7.64258265973403	0.00570062385557332	0.070519236963026	Activation
ATAATGATAAGAGTGTTCAT	YLR364C-A	-8.95217985730915	4.43605749953405	7.50270339512567	0.00616064483998349	0.070519236963026	Activation
GGTACCTCTTCTAAGCTAAG	tR(UCU)G2	-8.93491147857933	4.41890481497357	7.85736738099803	0.00506140355307002	0.070519236963026	Activation
GCCCGAGTCGGATACCGAAG	YOR084W	-8.93456445496255	4.41991961939645	7.3944164818154	0.0065426645759136	0.070519236963026	Activation
AGAACAGTTGGTATATTAGG	YOR128C	-8.92496555672178	4.41080534218791	7.77102396825111	0.00530909449172183	0.070519236963026	Activation
AAGTTTATTCCAATTGTGCT	YER137C	-8.906782245692	4.3932278862685	7.93653409448199	0.00484465370586227	0.070519236963026	Activation
CTAAATAGGATACAAACTAT	YER001W	-8.90628359456901	4.39358795511178	7.84292218312067	0.00510200660493251	0.070519236963026	Activation
AAGAAGCAAAACTTTACTAC	YFL004W	-8.89570191832638	4.38388467278199	7.81387944281772	0.0051846485386276	0.070519236963026	Activation
GAGGAAAATTAGTCGGAATG	YPL128C	-8.87887076912358	4.36699318602626	8.01220721999485	0.00464630719423305	0.070519236963026	Activation
ACAATTCTTTTTTAATTAAT	CUT464	-8.86762689858607	4.35772493192503	8.08230276290519	0.00446996097586663	0.070519236963026	Activation
GTGGGCTATCTGTTTGTTGG	SUT633	-8.85472495560452	4.34622300002332	7.94408220921646	0.00482448796380716	0.070519236963026	Activation
AAGCCAGATCGCTATTAACG	YER094C	-8.84807742006008	4.33959829954675	8.02300926714596	0.00461867643022722	0.070519236963026	Activation
CGCTGAAGTTCTACTAAGGG	YIL141W	-8.84427279031391	4.33560225942096	7.96459106501346	0.00477012667669857	0.070519236963026	Activation
GTTTTTAAGGTAAAGGTCAT	SUT175	-8.84080784629378	4.33213945012206	7.85245357994102	0.00507517834409188	0.070519236963026	Activation
GTAGATGCTAAATGTTATCG	CUT746	-8.84050072303023	4.33299729909077	7.95587182531531	0.00479316145231599	0.070519236963026	Activation
GGCTTCCAAAGCCCTATTGG	YGR229C	-8.83279559087	4.3263611764437	8.14971832762635	0.00430678500430731	0.070519236963026	Activation
GGAACACTATTGATATGGAA	YIR025W	-8.82359063476435	4.31751442506727	8.31406275265246	0.00393392980553868	0.070519236963026	Activation
AATATACTATATGGAATACG	YLR050C	-8.82307800563707	4.31669876313931	8.01444723383631	0.00464056361706828	0.070519236963026	Activation
GAAGTGTTTATAGCAAAGTG	YMR134W	-8.82111713664569	4.3153713170967	8.05717232102151	0.00453238660676241	0.070519236963026	Activation
AATAAAATGACTGGGAGCAC	YJR080C	-8.80842071471384	4.3043243278435	7.75777869655116	0.00534816955231204	0.070519236963026	Activation
AAGGCTTCAAGTAAAATTGC	CUT035	-8.80093728460747	4.29504412085862	8.05743756039434	0.00453172312098003	0.070519236963026	Activation
GTGTTTTCAAAACGAATTAC	YNR032W	-8.8009360190396	4.29531770517535	7.73756025020862	0.00540838247005625	0.070519236963026	Activation
CGCAGCTGACATCACAGGGG	YMR266W	-8.79470193550384	4.2906956526613	8.33826308705557	0.00388186921676036	0.070519236963026	Activation
GATCACTCAGTAACGTCAAC	YKL049C	-8.78817039185651	4.28577288451085	7.79737651183364	0.0052322147163506	0.070519236963026	Activation
GAAATCATGATAAACTTCCA	YJL163C	-8.78417902900876	4.28164796586332	8.01212113116502	0.0046465280773926	0.070519236963026	Activation
GAAGTGTTCAATTAACTGTG	CUT085	-8.78344383914273	4.28054671997101	8.11814065823428	0.00438244832800114	0.070519236963026	Activation
GGAATTTTGGCGGTTGAGAG	YIR034C	-8.75590068391833	4.25445250903923	8.09093299603674	0.00444872546041226	0.070519236963026	Activation
GGCAACAAATCTAAGCCTGG	YDR201W	-8.75091850972609	4.25050940059686	8.1785764968917	0.0042388010850378	0.070519236963026	Activation
GAAAGTGTTGATATGAATGT	YCL045C	-8.74520434250548	4.2454372825368	8.18158912216673	0.00423176722096929	0.070519236963026	Activation
CTTTCCATCACATCAGGTCG	YOL061W	-8.73866966679606	4.2408645129451	7.76894882504389	0.00531519712013698	0.070519236963026	Activation
AAAAGTATAAGAAACACTTC	YPL091W	-8.72450338072006	4.22669184939058	8.39777011221003	0.00375681571520959	0.070519236963026	Activation
TATAAATAGATACATTGATT	YKL181W	-8.71965499611285	4.22102941282764	7.89471422274472	0.00495794708302875	0.070519236963026	Activation
TGCTTCATTACTAACTGCTG	YJR066W	-8.71526976857936	4.21809962634226	8.23593680750475	0.00410689689555177	0.070519236963026	Activation
GTTGTGAGGTTAATATCCCC	YPL088W	-8.71346472654178	4.21747379586064	8.13674698831601	0.00433770339941073	0.070519236963026	Activation
AACATCTACCATCTATTCAA	YOR228C	-8.70207316611382	4.20761888782171	7.9760125410137	0.00474012354184333	0.070519236963026	Activation
ATCTGCTCAGTGAGTGACAT	YHR099W	-8.70048167160778	4.20507963231285	8.70565930550829	0.00317223662511879	0.070519236963026	Activation
AAAGATTAGAGCAAAAGCTT	YHR066W	-8.69055406369588	4.19522673666944	8.28746172875454	0.00399197495387609	0.070519236963026	Activation
CTGATCGGTGATTCCGGGGT	YER032W	-8.68394734024329	4.18881564928794	8.19131978547514	0.00420912916439303	0.070519236963026	Activation
GACGAAACTAACTAAAGTGT	CUT881	-8.64812333592253	4.1581218890913	8.40603243504632	0.00373977945933757	0.070519236963026	Activation
GAGGTGCTTTTGTACGACTG	SUT066	-8.64638136809531	4.15440221340957	8.24721065802334	0.00408146709192238	0.070519236963026	Activation
AATTGATAACAAGAGAATCG	YDL207W	-8.61249069478325	4.12539432339703	8.51205895387128	0.00352800652232154	0.070519236963026	Activation
AAAAATACAGAAACTACAAA	YBR233W-A	-8.59967509160007	4.11425872850774	8.54813642783832	0.00345876134714579	0.070519236963026	Activation
GTGCACCGGGAAATAACGCT	YER131W	-8.55987306821745	4.07852708048312	8.54273734299653	0.00346903548073168	0.070519236963026	Activation
ACAAGGTATTATGACAAAAC	CUT117	-8.54245948103239	4.06146126278326	8.68409241899013	0.00320999386106148	0.070519236963026	Activation
GTTGGATATTTTATACTGTG	YKR100C	-8.48366322807503	4.00998654318203	8.73773760148835	0.00311691002628007	0.070519236963026	Activation
ATTATAAAAACAAACTTTGC	SUT066	-8.46592194458377	3.99482139596336	8.63440642804959	0.00329872702560885	0.070519236963026	Activation
CGCTGAATTGGACAGAAAGT	YGL245W	-8.46587068414002	3.99452327406186	8.67099150810265	0.00323315233235062	0.070519236963026	Activation
AAGATTACCAAGGTCTACAG	YOL066C	-8.46560261303113	3.99124565299423	8.74743899546795	0.00310037153813898	0.070519236963026	Activation
AATCGCGTCTGACGAATGAG	YGL137W	-8.46226049566363	3.99146905400063	8.70511894473501	0.00317317710293895	0.070519236963026	Activation
AGATAAGATAAGATACTGAT	YLR048W	-8.44767598318987	3.97619092594846	8.91562258476413	0.00282741406032004	0.070519236963026	Activation
CCCCACAAAGGGGCGCCGCG	YGL037C	-8.42926150757391	3.96095807365066	9.27933499119882	0.00231753552595862	0.070519236963026	Activation
GAAATATAATAAAAAACTCG	YMR103C	-8.41835343550808	3.95004849124819	9.02344180094546	0.00266539039694602	0.070519236963026	Activation
GAGACACACTATAGAGAATT	YIL073C	-8.36159425562253	3.89984164404229	9.46329529178857	0.00209624151434129	0.070519236963026	Activation
ATTACAAATTGATTTAAAAT	CUT862	-8.35814443137766	3.89475390648499	8.95088222141518	0.00277335617173602	0.070519236963026	Activation
AAATAACGTTGATCTAGTTT	SUT335	-8.35385117309713	3.89298979149313	9.1441778644639	0.00249510724571111	0.070519236963026	Activation
TTTTTTGGCCGGTTTTACCG	SUT597	-8.31100036851032	3.85363273977691	9.19799806612171	0.00242279948073504	0.070519236963026	Activation
AAATTGTTAGATATTAAACC	YCR027C	-8.26951608183358	3.81942269918094	9.29534976011391	0.00229736274875433	0.070519236963026	Activation
GGTACCACCATCAGGATCAC	YBR108W	-8.26067223335573	3.81277830452764	9.46404499223174	0.00209538495357399	0.070519236963026	Activation
ACAGCCACAATCTTAAATGT	YPL128C	-8.25332933598053	3.80425959790657	9.41275134137415	0.0021548165278614	0.070519236963026	Activation
ATCATCGTCATATCCAGTGT	YCR073C	-8.23349333237396	3.78447773021405	9.38189862737603	0.00219138472018584	0.070519236963026	Activation
TTTCTCAGGAAATATAAACT	YDR295C	-8.1722154474953	3.73255047759515	9.66569337293074	0.00187740891228499	0.070519236963026	Activation
GGAAAGTAACTCATCTAAAG	CUT409	-8.14166926874119	3.70490422696298	10.0540336383414	0.00152014735846448	0.070519236963026	Activation
GATTCCAGAAGATCCCAACG	YKL088W	-8.12295640608575	3.68943746951295	10.0131378208499	0.00155427487757828	0.070519236963026	Activation
GAGTTATCACGGCTATGTCT	CUT114	-8.11064407276231	3.67672323775929	10.183554058789	0.00141698794068851	0.070519236963026	Activation
GGCGTAGAGAAGGTGGCGTG	YIL154C	-8.08971045801682	3.66186042245103	9.80889798946583	0.00173669540955852	0.070519236963026	Activation
GATACCACAAATACCAACAG	YHR115C	-8.06881885687551	3.64010810859521	9.98007550196552	0.00158243195672583	0.070519236963026	Activation
CACATGCCTGGTACTACCAG	SUT809	-8.06688612898649	3.64102611854037	9.99607797994128	0.00156873971721838	0.070519236963026	Activation
GACATTTCAGAGTTGCACGT	YKL176C	-7.99913238532141	3.58204914091375	10.5919776327488	0.00113579419233844	0.070519236963026	Activation
GAGGAACTGAGGACTTTACG	CUT190	-7.96879800811104	3.55613366942229	10.3177878993149	0.00131754115367963	0.070519236963026	Activation
GATTCTTTCTAACATCAAAG	YDR508C	-7.94918289620899	3.53828514269566	10.4339772310077	0.00123718038758982	0.070519236963026	Activation
ATATCACATCTTTAAGAACA	YGR147C	-7.93167121189658	3.52543099998458	10.7756057612214	0.00102846551636418	0.070519236963026	Activation
CTCCAGACAAAAGAACGTGC	SUT194	-7.86344680444618	3.46581752778223	10.7559741391197	0.00103943241497656	0.070519236963026	Activation
GAAGCATAGAACATTATCCG	YIL101C	-7.84574929935321	3.45194900193003	11.1280494508239	0.000850319633815771	0.070519236963026	Activation
TGCTTCAGTTCCCTTTTGGA	YLR214W	-7.74963338940195	3.36932429305315	11.2933125561516	0.000777867685715068	0.070519236963026	Activation
AAAATTACTCATCGAGAGAG	YNL036W	-5.86869295148708	4.697304601936	6.05477855262186	0.0138687145805888	0.070519236963026	Activation
CCATGTCTGATTCTGGACCA	YGL090W	-5.80403262105154	4.63889825579457	6.06027303998926	0.0138256307025258	0.070519236963026	Activation
GGACAACTACAGCCAGTCGA	YPR009W	-5.70674932715097	4.55557930932173	6.232697843597	0.0125412524225575	0.070519236963026	Activation
AGCTCATCTCATCTGTATTT	YKL172W	-5.70060602161227	4.54951926680391	6.23255858256339	0.0125422387157809	0.070519236963026	Activation
CGTCAATAGCGGCGTCAGCG	YKL187C	-5.49868850162311	4.37097853481487	6.2587421876067	0.012358191498116	0.070519236963026	Activation
GTATTCCAAAAGAAAAAGTG	YIL021W	-5.34095867702298	4.23269561049176	6.05673646184665	0.0138533462260737	0.070519236963026	Activation
GTGCTCCGTGGATGTCTCCG	YGL209W	-5.30385174908601	4.20394526100202	6.36998091102139	0.0116066844284585	0.070519236963026	Activation
GTATCGCCTGTGTTGGAGTG	YPL255W	-5.29208110791685	4.19294708786484	6.47438067723677	0.0109440442951697	0.070519236963026	Activation
AAAGAATAGATAATATGGAG	YGR221C	-5.26639076417571	4.17224021825886	6.48381563529637	0.0108861047572355	0.070519236963026	Activation
GCTGTTGCCATACGATAAGG	CUT196	-5.2093637168664	4.12194211854195	6.28152174034905	0.0122003292304751	0.070519236963026	Activation
CCCAACGCTTATCCAAGGGG	YCR091W	-4.78542629188948	3.76701624074016	7.19493733009682	0.00731095440430363	0.070519236963026	Activation
CCGGGTAGCGAACTTTGTTC	YBR095C	-12.9897431679918	8.35686589068936	6.22257982151682	0.0126131195087789	0.070519236963026	Activation
GCATAGTACCTAAAACGGGT	CUT235	-12.8797577215036	8.24755213306096	6.14917831039347	0.0131473171263833	0.070519236963026	Activation
GCGAGCGCCCTGGTAAAATG	YNL096C	-12.5860168495057	7.95585629084551	6.33823146632483	0.0118162638668504	0.070519236963026	Activation
GATCTTGAAATGGGTTGGGC	CUT632	-12.4724542917763	7.84310230259935	6.0943940957285	0.0135611419548054	0.070519236963026	Activation
GCAAGGCGACAAGGTGAATG	YLR027C	-12.2990298045719	7.67115268486952	6.16830934919068	0.0130058841626326	0.070519236963026	Activation
GTTCGTATCCTAGCATCCGG	SUT248	-12.2807551819027	7.65316846717433	6.24598367864425	0.0124475231916016	0.070519236963026	Activation
GGTCATTGAAGAAGCAAGGG	YJR083C	-12.2768915550552	7.64925289396549	6.18363802029237	0.0128936906621776	0.070519236963026	Activation
CCCGGTCCACCAAAGAACTC	YLR178C	-12.2472148928343	7.61984493556388	6.30288052959002	0.012054194259387	0.070519236963026	Activation
GTCACCAGTGGCCAAGTGAG	SUT476	-12.2185371138398	7.59148241658119	6.15658477026564	0.0130923756201898	0.070519236963026	Activation
AGCCGTTTAGGCTTGCTATG	YJR021C	-12.1442797204528	7.51787523692743	6.18341128012771	0.0128953429479319	0.070519236963026	Activation
TTCGTCTCTTATGTAATTTT	CUT119	-12.0902382706001	7.46453661801916	6.14656658218654	0.0131667475435572	0.070519236963026	Activation
GATTGTAAAGAATAACGTGG	YPR128C	-11.9273724552938	7.30339019748818	6.17635791331827	0.0129468506030506	0.070519236963026	Activation
ATTTTCCGATCCCCAAAGCT	YIL068C	-11.9126208952337	7.288772612349	6.11068653540518	0.013436692568963	0.070519236963026	Activation
GAGAGAATCTCATAATTACA	YHR097C	-11.872330754815	7.24900807978958	6.20751508686199	0.0127209074948655	0.070519236963026	Activation
GAAGACGCCGGCTGTGACGC	YGL148W	-11.8712233429286	7.24783429160655	6.11421181476882	0.0134099197205316	0.070519236963026	Activation
GAAGGGTACGCTAACAGAGC	YBR145W	-11.8385583425815	7.21576918775305	6.15278728922025	0.0131205159854612	0.070519236963026	Activation
ACATCCGAATTATTTTAGTT	YGR099W	-11.7853951219249	7.16310871898451	6.2254066546258	0.012592998360095	0.070519236963026	Activation
GAATTCAACTGTTCTTGGCA	CUT319	-11.7624693245733	7.14051230990253	6.33121834757963	0.0118630793653208	0.070519236963026	Activation
GGTAAGCTCTCTTTTGTCGT	YGL195W	-11.7508572585496	7.12908432012872	6.24023565370632	0.0124879858485964	0.070519236963026	Activation
AGCAAGAATTGCAGAACTAG	CUT293	-11.7394642485171	7.11790809734737	6.27215435936597	0.0122649928897214	0.070519236963026	Activation
CCCACAGCACGGCCAACAGG	YDR249C	-11.7383415275528	7.1166472469496	6.17245203203203	0.0129754644758483	0.070519236963026	Activation
AGCGCAACTACAGAGAACAG	YGR192C	-11.7275101922557	7.10598384201762	6.20352285235267	0.0127496302327172	0.070519236963026	Activation
GTATTTTTCAAGCATTGAAA	YML068W	-11.7181254770425	7.09670799217023	6.18593880018841	0.0128769368743596	0.070519236963026	Activation
ACCGGCGCTTCTATGCAAAC	SUT759	-11.6924353465978	7.07143545970807	6.28603927932226	0.0121692696204476	0.070519236963026	Activation
CTTCATGTGACAGCAAACGG	YLR119W	-11.6582999358504	7.03772520009064	6.34453726457012	0.0117743319969514	0.070519236963026	Activation
GCTCTGACAAGGCAATACGC	YDL235C	-11.6401635784108	7.01991581242626	6.33396189354747	0.0118447424114675	0.070519236963026	Activation
GGATGACCAATCTATTGCGC	CUT704	-11.5601706818525	6.94114907162398	6.39759531063084	0.0114275045454691	0.070519236963026	Activation
GAAAATTGCTATCAAATGCT	YBR187W	-11.5370602842964	6.9181922595171	6.18865301483804	0.0128572013066315	0.070519236963026	Activation
AAGAACAGGGTCTAGTTAGG	YHR016C	-11.5281868533792	6.90942280283074	6.06813527609218	0.0137642199479668	0.070519236963026	Activation
TGCACAACGTCACTCAAAGG	YBR104W	-11.5215477669631	6.90300806393928	6.32062977751217	0.0119341236494412	0.070519236963026	Activation
CCGTGCTTATATCATCGAGG	YKR059W	-11.5205608851931	6.90203090988836	6.35997788908599	0.0116722998160797	0.070519236963026	Activation
GGGCAAAGCGTGCTTTCGAT	YHR027C	-11.5199401113067	6.90148033095722	6.40876179503151	0.0113558577206117	0.070519236963026	Activation
ATAAATAACATCCTAAAGAC	YBR123C	-11.4767571689569	6.85882752573391	6.17311013562691	0.0129706387625895	0.070519236963026	Activation
ATATAAATAAATATTCGTTC	YJL111W	-11.470256332756	6.85249311285411	6.32282495486166	0.0119193592368771	0.070519236963026	Activation
GTACACAGAATCTTCACGAC	YER177W	-11.4700539622294	6.85228807673295	6.31329264134275	0.0119836084906641	0.070519236963026	Activation
ACACCTTACCAAATTGTGAT	CUT302	-11.4633855013017	6.84564160370945	6.13307571700797	0.0132675864070401	0.070519236963026	Activation
GTGACTTTGAAGCGTTTCTT	YGR283C	-11.4627245671229	6.84508212928929	6.40174615060447	0.0114008177450758	0.070519236963026	Activation
GGAGATGTTATTATGTAACG	YBR085C-A	-11.4579669724414	6.84044492488954	6.39244734722767	0.0114606911978906	0.070519236963026	Activation
GAATTACTATAAAAACAATG	YIL028W	-11.4379945255225	6.82081493548401	6.43195005740268	0.011208545250733	0.070519236963026	Activation
GGGAAATCTGAGGCCGATCG	YOR376W-A	-11.4232001049721	6.80622350676507	6.43685460076833	0.0111776393094006	0.070519236963026	Activation
GTTATGGTTAGATTCTTACT	YNR037C	-11.4022184512648	6.78546201409788	6.11865280153986	0.0133762705638907	0.070519236963026	Activation
AGAAACGTTTTCTTGTGGGG	YER097W	-11.3669480859891	6.75091907614104	6.82678690941691	0.00898006665627084	0.070519236963026	Activation
AATCGAAAGTAAAACAGATA	YML008C	-11.3657408802107	6.74963553593319	6.27610554572765	0.0122376747630171	0.070519236963026	Activation
GATCATTAGGGGAGTATTGG	YOL126C	-11.3626621768593	6.74657800386197	6.25935082157769	0.0123539465001311	0.070519236963026	Activation
GGCCTTGTTAAAGCCTTCGC	YLR260W	-11.3530167441887	6.73735841884499	6.52483133911747	0.0106378636162322	0.070519236963026	Activation
GAGGAAAAAGTATTAGAAAA	SUT082	-11.3492916183277	6.73343400151757	6.15869408239054	0.013076771855088	0.070519236963026	Activation
GAGCTGGATGCCCTCTGTGT	YIL046W-A	-11.3312548314037	6.7158143440141	6.41323806016411	0.0113272665352222	0.070519236963026	Activation
TAGATAAAATACATAAGTAT	YBR221C	-11.3243463798292	6.70892172753056	6.23706717407843	0.0125103478024352	0.070519236963026	Activation
ATGATTTTAGTATTTCAAGC	YIL096C	-11.3182813029984	6.70300378656679	6.27784115448834	0.0122256946936823	0.070519236963026	Activation
AGAACTTGGATTCGACTCGG	CUT713	-11.2963349654634	6.68147165460585	6.37673342863647	0.0115626050944595	0.070519236963026	Activation
AATTTACGCAACAACTTGTT	YER087W	-11.2926977315749	6.67814622478937	6.50923404714637	0.0107315723706949	0.070519236963026	Activation
AAGTGCTAGTAGAGAATGAG	CUT557	-11.2917887456204	6.67699007961156	6.31281572935852	0.0119868322769714	0.070519236963026	Activation
GGTATGCAGGAATTTGTGCG	CUT084	-11.2747640721689	6.66028988978765	6.35174075781273	0.01172661759778	0.070519236963026	Activation
ACTAAAAATCATTCTTGACG	CUT763	-11.250102268366	6.63599212986968	6.14807290753005	0.0131555373673282	0.070519236963026	Activation
ATCTTTACCGCATTACACAC	SUT405	-11.2433110489023	6.62938961226402	6.30093000905571	0.0120674646387805	0.070519236963026	Activation
AAAAGGACTTTATAATAGAG	YOR296W	-11.2432304272391	6.6293131058629	6.31041777823001	0.012003055231674	0.070519236963026	Activation
GAAGTTTTACAAAGGGAACA	YEL040W	-11.2316102527024	6.61785613497153	6.1487538544985	0.0131504729343507	0.070519236963026	Activation
GTTCCGGGCATATCGGACTG	YFR033C	-11.222706810834	6.60918215145729	6.32717711792177	0.0118901427146326	0.070519236963026	Activation
CAATCTTTTCCTTGACTCGG	YDL195W	-11.2128796891	6.59976446942882	6.5104161080327	0.0107244409721615	0.070519236963026	Activation
GCGTCCCGTTTCTTTTCGCG	YOR372C	-11.1852726486282	6.57258637594958	6.45410722143188	0.0110696151386245	0.070519236963026	Activation
GATAGCCTGTCCCGTAATCG	SUT708	-11.1805879613622	6.56791515811408	6.5612157729355	0.0104225134697242	0.070519236963026	Activation
GTATTCAAAGCGAATTTGAG	YDR031W	-11.1350804786724	6.52321069565641	6.16820195509469	0.013006673730732	0.070519236963026	Activation
GGTACCAGTATATCTATGAC	YIL118W	-11.1263733155068	6.51486810503479	6.44607262637518	0.0111197884017405	0.070519236963026	Activation
GCATTCCGAAGAATTTCATC	YDR447C	-11.1234394828213	6.51205036487703	6.41940111353489	0.0112880221849459	0.070519236963026	Activation
ACCAATCGGAGTGAATTGCG	CUT399	-11.1205376564133	6.50903481481481	6.30443876125654	0.012043603589554	0.070519236963026	Activation
AAGCATGACAGTAAAATATG	YDR046C	-11.1179294537275	6.50638068348463	6.08999731029532	0.0135949293763315	0.070519236963026	Activation
CATTTTCGGCTGTTTCGTCG	YNL045W	-11.1156620842652	6.50429667043403	6.36548670296377	0.0116361174663364	0.070519236963026	Activation
GGTACCATATACGAAGATCG	YML007C-A	-11.1056534902362	6.49475733821875	6.33676479041593	0.011826038828961	0.070519236963026	Activation
GGTTGAAATTAACAAAGGAG	YNL070W	-11.0968016825279	6.48593062357452	6.6670230801707	0.00982131016565694	0.070519236963026	Activation
AGAATTGGCTTTAATAAACT	YGR166W	-11.0836682826957	6.4731034387312	6.44909725894133	0.0111008732891985	0.070519236963026	Activation
GATTGCGGGTAACACCTCCG	YOL012C	-11.0818946504031	6.47113862770955	6.44844156383636	0.0111049709980768	0.070519236963026	Activation
AGATCTATTCACCATCTCGG	YKL098W	-11.0782467269109	6.46756887885944	6.25627759157635	0.0123753964740212	0.070519236963026	Activation
ATATCAAATGAGTGCTTGTG	YGR212W	-11.0724088146716	6.46217160383911	6.35253486410147	0.0117213697702984	0.070519236963026	Activation
GAGTTGCCCAACATTTACAG	CUT361	-11.0716928262177	6.46149078508593	6.31936192893387	0.0119426595511378	0.070519236963026	Activation
CGCAGGCCTCTTGTTCCGGG	YML026C	-11.0688217818338	6.45866774180628	6.48921570468261	0.010853084924341	0.070519236963026	Activation
CGATCTTTTGATCAAATGGC	YOL070C	-11.0627027837691	6.45251180435144	6.57615232793733	0.0103354068641405	0.070519236963026	Activation
GAAAGTGTTCTTTATATCGT	YKL135C	-11.059699341312	6.4495246557003	6.37755194766203	0.0115572736260345	0.070519236963026	Activation
AATAAAAAATAAGTGAGACC	YBL091C	-11.0589499542585	6.44861926150383	6.09582408978438	0.0135501716815185	0.070519236963026	Activation
GAGGCATGTCCAACTGTGTG	YNL097C	-11.0523112875745	6.44225737232265	6.49429181543988	0.0108221396826418	0.070519236963026	Activation
GAAAGAACTAGAGATGTCAG	YER161C	-11.0426092051154	6.4327024833642	6.25049824057598	0.0124158378320378	0.070519236963026	Activation
AAGTTAGAATTGATAATGCT	SUT845	-11.0376378863723	6.4277404041747	6.05329766972468	0.0138803502279184	0.070519236963026	Activation
ATTACTGAAGATAGACACAT	CUT305	-11.0312659285103	6.42159746027246	6.28486355652031	0.0121773452863783	0.070519236963026	Activation
AATTAACTAACTATATAACG	YOR336W	-11.0233601909118	6.41387564323769	6.51617049700254	0.0106897939830847	0.070519236963026	Activation
GTTTGGTACGAGGCGACTCG	SUT219	-11.019463934212	6.41029196352107	6.41921509168031	0.0112892046678817	0.070519236963026	Activation
AAAAATAGAAAGCATTAGAT	YGL184C	-11.0152624207466	6.40595768657678	6.32471892541953	0.0119066357664968	0.070519236963026	Activation
GGATATTTCCTATCGTTGAT	YOR191W	-11.0026504815758	6.39348565604214	6.08095054149392	0.0136647225590504	0.070519236963026	Activation
GGATGTTGTGCAGCAGAAAC	YMR159C	-10.9967867523501	6.38780191082894	6.18741024542683	0.0128662338566043	0.070519236963026	Activation
AAGACATCCGATTAAAGTGG	YGR246C	-10.9798480849103	6.37138994664559	6.62517951590762	0.0100547008626425	0.070519236963026	Activation
GGAGAAAAAACTACGTCAGT	YGR174W-A	-10.9683431105323	6.35997069752893	6.21973830512697	0.0126333784667475	0.070519236963026	Activation
AAAGAACTTTTTATCTGTGT	YLR423C	-10.9671329736153	6.35911252780681	6.41032941475816	0.011345836467388	0.070519236963026	Activation
GGATCAGTCCTGGCGTTAGG	YNL162W	-10.9413627666675	6.33407791353798	6.40685706007614	0.0113680462612384	0.070519236963026	Activation
GAATATCTAAATAAAAGCTT	YGR158C	-10.9276773537533	6.32063985589234	6.42892273785346	0.0112276656361909	0.070519236963026	Activation
GGTTTTAGAGGTTAATTAGG	YLR304C	-10.9200955213552	6.31325810100146	6.25660680106625	0.0123730968886723	0.070519236963026	Activation
CGCAAGCGTAGTTAGTACCA	YNL140C	-10.917753774057	6.31071363786682	6.44612142317402	0.0111194829794039	0.070519236963026	Activation
GATTGCGAAAGGCGTTAGAG	YPL004C	-10.914119074686	6.30711964295331	6.41152806659269	0.0113381800223997	0.070519236963026	Activation
GACAAGGGTAGCCGAACGAC	CUT883	-10.8927396622886	6.28619723363023	6.549215634418	0.0104930406828766	0.070519236963026	Activation
GAGAGATCCTATGAATTGCT	YER049W	-10.88249812242	6.27607316354369	6.14032249538915	0.0132133212973051	0.070519236963026	Activation
AGTATCAGTACTTTATGCTG	YDR449C	-10.8811411900513	6.27507385854341	6.47424066474653	0.0109449064819885	0.070519236963026	Activation
ATTTGTATTCTAATGCTTGT	YBR136W	-10.8798296349564	6.27349302765498	6.21002629628324	0.0127028742947446	0.070519236963026	Activation
AGCAGTGAAACGCTAAATGC	YHR003C	-10.8747514904936	6.26868954660694	6.47166439148253	0.0109607834306516	0.070519236963026	Activation
ACCTTGATCTTGTGCCGCCG	CUT403	-10.858094934425	6.25249179430764	6.71812568279255	0.00954378743791874	0.070519236963026	Activation
GAACTATTTGAAGTATTAGG	YOR383C	-10.8352168647679	6.23009730261303	6.52126949256018	0.0106591890357389	0.070519236963026	Activation
GAAATTCTTTGAGTCGTACG	CUT453	-10.7955942315715	6.19170420132924	6.4964843648477	0.0108088013565871	0.070519236963026	Activation
CAAAGCTGGCGTCCCGCATG	CUT085	-10.793068074159	6.18881404637997	6.17051899393149	0.0129896496474856	0.070519236963026	Activation
CCCTCGCATGACAAATAGCG	CUT922	-10.7865916395365	6.18266322617748	6.46459859350305	0.0110044496172308	0.070519236963026	Activation
AGATCCTCCAAGAAGCCAGG	YFR004W	-10.7851849971871	6.18109017922389	6.05347232534974	0.0138789773951253	0.070519236963026	Activation
GATTCCAGAAGGTAGAGGGG	YMR219W	-10.7763095627138	6.17299895152317	6.15618277591723	0.0130953515687585	0.070519236963026	Activation
AAAACAGCGCTCAGTAAGCG	YNL003C	-10.7653062367099	6.1618151912631	6.34337322883485	0.0117820610084539	0.070519236963026	Activation
ATTATTTAAACAACTTGAAC	YGL205W	-10.7601628991998	6.15713947536588	6.43509812163032	0.0111886976853705	0.070519236963026	Activation
AAATTATAGATACAAAAAGA	SUT284	-10.7600955590439	6.15678773864678	6.45082096637069	0.011090108529698	0.070519236963026	Activation
GGTCGTTTTTACCTGTTCCG	YPL068C	-10.7533989276394	6.1506146944947	6.40787962134173	0.011361501147354	0.070519236963026	Activation
GTTAAAAATACAATGGACAG	YDR350C	-10.746328800766	6.14361496301586	6.5115335832068	0.0107177036901773	0.070519236963026	Activation
GAATTGTACAATCAGTGTAT	YIR023W	-10.7456363217772	6.14282732481272	6.55127082930997	0.0104809272525678	0.070519236963026	Activation
CGTCTCAAAAGCGGCATCTG	CUT846	-10.7197448469634	6.11756991165268	6.67524021322976	0.00977613359960782	0.070519236963026	Activation
TCGCCTTACGCTAGAAACCG	YLR345W	-10.7176388141498	6.11583328724745	6.22002719183751	0.0126313172856392	0.070519236963026	Activation
AGAATAAACAAATTGTATGG	YDR331W	-10.7159851401779	6.11401301498001	6.65943926289011	0.00986319468900155	0.070519236963026	Activation
AACATCAACCAATTTTAAGG	YMR210W	-10.7131386243103	6.11118458529183	6.61548419016603	0.010109584941262	0.070519236963026	Activation
ATCTGATGTTAAGCTTTCTG	CUT185	-10.7095266193252	6.10784374845556	6.42988038739592	0.0112216135571538	0.070519236963026	Activation
GAAGGCGTTATCTACATGGG	YKL072W	-10.7025766363332	6.10108259436244	6.41823466301992	0.0112954390481976	0.070519236963026	Activation
GCCTTTGTGCATTTAGTATC	YJR112W	-10.6932519243709	6.09170586372786	6.45930184863474	0.0110373001812067	0.070519236963026	Activation
GAGAGAATCATAGCAAGAGG	YJR068W	-10.6790793501566	6.07781377753129	6.24356209022743	0.012464553280192	0.070519236963026	Activation
GGTTTTGGTGGTGGACGTGG	CUT662	-10.6783376898395	6.07722921942965	6.66759360147527	0.00981816662520366	0.070519236963026	Activation
AACAATAGTCTTTTAACATG	YDL106C	-10.6751553160924	6.07392721767095	6.0721927056768	0.0137326378055488	0.070519236963026	Activation
ACATGTAAAAATGTTGTAGG	YHR016C	-10.6700797262059	6.06911678983427	6.50141923753443	0.0107788418221755	0.070519236963026	Activation
ACCTCATTTGATCTCGAACG	YML012W	-10.6650757495853	6.06451996326369	6.44712095069286	0.0111132287652535	0.070519236963026	Activation
GCGCAGCATAGTGTTAGTGC	YFL021W	-10.6607308510058	6.06034125293176	6.50279268653269	0.0107705187967156	0.070519236963026	Activation
CGGCGGAAAATGGAAAATTG	YER162C	-10.6538291619958	6.05340174108243	6.4881982254424	0.0108592986451186	0.070519236963026	Activation
GGCTCATTATGAGAAAAGGT	YDR058C	-10.6451248450158	6.04522747340268	6.27537509753894	0.0122427202989961	0.070519236963026	Activation
CAATCCTGCAGCCTGCACTC	YKR052C	-10.6446515552869	6.04439333535903	6.56898048516663	0.0103771378834557	0.070519236963026	Activation
ATGTTACCTGTTTTGCATAG	CUT522	-10.6432994810747	6.04330900790351	6.52312047282056	0.0106481014155648	0.070519236963026	Activation
CGCGCCGGAAAAATAGCGAG	YEL017C-A	-10.6411766361142	6.04111844183574	6.55346204834434	0.01046802788242	0.070519236963026	Activation
GGCTGTAAAAAAGATATAAG	YDL194W	-10.6219041837748	6.02253184804946	6.69066581414709	0.00969190014433654	0.070519236963026	Activation
CGTTATTCGTCTCATTTGCT	YIL114C	-10.6206886095602	6.02098711657507	6.24321794212986	0.0124669754818146	0.070519236963026	Activation
GTTTCTTCCGAAAGACGGAA	YPR150W	-10.6186031706801	6.01927649755738	6.5196100892928	0.0106691391500231	0.070519236963026	Activation
GATGTTAGCGTCTCACTCAG	YOL140W	-10.611942994958	6.01272594766367	6.52959067926293	0.0106094368627467	0.070519236963026	Activation
GACGACGGTAGAAAGATTTC	YIL056W	-10.6049827075997	6.00595247177845	6.52090206815521	0.0106613913653823	0.070519236963026	Activation
GGTTCAAAAGGCCATTGACC	SUT427	-10.6023241054552	6.00368432919834	6.08654876391027	0.0136214905622042	0.070519236963026	Activation
ACACTAAAGAGTGAGATCAG	YIL076W	-10.5953689042134	5.99678369012896	6.38532202323219	0.0115067883180379	0.070519236963026	Activation
GAATCTTTCTGGTGCCAAGG	YER038W-A	-10.5946465360935	5.99592173140153	6.47605377351389	0.0109337468784115	0.070519236963026	Activation
TGAATTTTAGCTTTATGCTG	SUT400	-10.5825089599328	5.98425746010066	6.42652075629129	0.0112428602334828	0.070519236963026	Activation
ACATTATATATAAGGGAAAG	YHR113W	-10.5706878638448	5.9724743250809	6.28204203608474	0.0121967478760539	0.070519236963026	Activation
GAGATCAATAGCCTGATAGC	CUT014	-10.5705879286207	5.97250902764612	6.45001617733705	0.0110951332000564	0.070519236963026	Activation
CGGAAAGAAAGCATAAGGAG	YMR145C	-10.5670264492556	5.96895800376003	6.34722744076647	0.0117564895676571	0.070519236963026	Activation
GCCCTCCAGCTTGAAAGGGG	YJL036W	-10.5578967992317	5.96016327081273	6.39469051208664	0.0114462183578757	0.070519236963026	Activation
GCTATAAAAGTGATTTGTGG	YPR062W	-10.5570035804046	5.95959762386177	6.20880421039909	0.0127116469095566	0.070519236963026	Activation
AAGATCGATGGGACGACTCG	CUT879	-10.5561045298056	5.95832124506943	6.28046036795719	0.0122076383303165	0.070519236963026	Activation
AATTTGCCTTTACTATCATT	YIL017C	-10.5433719884487	5.94601564642807	6.34563387298056	0.0117670554543009	0.070519236963026	Activation
CCAATCATCAAATCCAAGTC	CUT178	-10.5414544659293	5.94403385095444	6.1182419722221	0.0133793797513786	0.070519236963026	Activation
GGAATCATGTCATTAGGCTC	CUT258	-10.5401613289595	5.94301495751706	6.40468020978367	0.0113819925305824	0.070519236963026	Activation
GTAAATGATGAGATAATTGT	YGR218W	-10.5270191340131	5.93012516473234	6.37058296557623	0.0116027473194402	0.070519236963026	Activation
GAAATATCGATCAAAGCAAT	YLR154C	-10.5268489357813	5.9301685898099	6.64797598670684	0.00992685276754318	0.070519236963026	Activation
ATACTATTATTCTTGATATT	CUT595	-10.5263010055642	5.92935905522529	6.23386495884233	0.0125329896539405	0.070519236963026	Activation
AGAACTTAAGCATCATTGGT	CUT169	-10.5239925605205	5.92727598580399	6.44522922241808	0.0111250686823072	0.070519236963026	Activation
GATATCTACAGATGTTTCAG	YJR022W	-10.5144466707759	5.91788159964592	6.28903519791707	0.0121487164661746	0.070519236963026	Activation
GGATGGGGCACAGATGTGCA	YER088C	-10.4944818135003	5.89877612160517	6.68388034081799	0.00972886108970384	0.070519236963026	Activation
AAATTAATAATAAAGAAGAG	SUT576	-10.492007087423	5.89629263134296	6.56383246700608	0.0104071992950615	0.070519236963026	Activation
AATCTCGTATCCTCGCATCC	CUT782	-10.483240994594	5.88810608468829	6.08348129543747	0.013645161484574	0.070519236963026	Activation
GTTCCTCAAACCGAGATGAT	YLR035C	-10.4825765536416	5.88698629712735	6.34681677179098	0.0117592115080943	0.070519236963026	Activation
AGAGATATATTATTTTGATG	YPL212C	-10.4654484833475	5.87063491053844	6.49878709458804	0.0107948109055031	0.070519236963026	Activation
GAGCATAAGAAAAGGACTGC	YPL066W	-10.4643768618403	5.86924313903996	6.13889438785689	0.013223997126521	0.070519236963026	Activation
GCCCGTGGTAAAAAGTGTGT	SUT377	-10.4622024567902	5.86714290134836	6.10818735999127	0.0134557059291229	0.070519236963026	Activation
GTGGAAATGAGGTTTTTGAG	YLR250W	-10.446314099664	5.85192755505511	6.64662914641035	0.00993435965738746	0.070519236963026	Activation
GATTAGAAACAAAGAAAAAT	YBR234C	-10.4394394791303	5.84529594324314	6.5792659324646	0.0103173432414052	0.070519236963026	Activation
GAAGATTCTATGGAGTAGCC	CUT115	-10.4335692738878	5.83980497496766	6.46349211617704	0.0110113037226621	0.070519236963026	Activation
ATGATTCATTACTTATATAT	YGL083W	-10.4324557126664	5.83865663309682	6.54245632591888	0.010532981765845	0.070519236963026	Activation
GCAAATGATAATGGCAATAG	YLR402W	-10.426578986554	5.83265339996211	6.24690869877285	0.0124410241966852	0.070519236963026	Activation
CGGAGTTGATCCTTTTGACT	YKL174C	-10.4157809921782	5.82248775997894	6.63205989565013	0.0100159372062268	0.070519236963026	Activation
GAAGATACCCGAATAAGGTG	YNL079C	-10.4157596387868	5.82240426944483	6.6327389399447	0.0100121198243923	0.070519236963026	Activation
AATCTCATGGATTAAAAAAG	YHR171W	-10.409163612316	5.81592156803085	6.4924032107582	0.0108336425028015	0.070519236963026	Activation
AGTAGTCTTGATTATTTAGC	YPL166W	-10.402652910021	5.80991399521042	6.4142415283856	0.0113208672402851	0.070519236963026	Activation
CATCAGCTGGGAAAGAGGCG	YDR511W	-10.3979860637204	5.80522160528359	6.57577054146784	0.0103376240346261	0.070519236963026	Activation
GGTCATGCTTTTTGTTCGAG	SUT480	-10.3974748254999	5.80469339235229	6.55201655372581	0.0104765354587266	0.070519236963026	Activation
GCAGTTATAATGGAAGGAGG	SUT209	-10.393515436463	5.80088984860579	6.58144735491777	0.0103047069722301	0.070519236963026	Activation
AATAATGTGCTTTGATTAGC	YDR404C	-10.3929826445951	5.80064757158562	6.2118163697184	0.0126900356705013	0.070519236963026	Activation
AGCTTTACTTAGACTTCGGG	YOR148C	-10.3891928362761	5.7967648161445	6.57792731632637	0.0103251052728578	0.070519236963026	Activation
AGTGAAGAGTTAAAACGTAA	YOL064C	-10.3889831585268	5.79636174032138	6.54984136773972	0.0104893510573584	0.070519236963026	Activation
CGCAATGCGACATTGATCCT	CUT051	-10.3815774912496	5.78942328834101	6.52268838166598	0.0106506886407835	0.070519236963026	Activation
ATGAAGACTGTACATTCACA	YPL236C	-10.3758355332034	5.78397521551727	6.4370438668035	0.0111764484048844	0.070519236963026	Activation
AAAAAACTGTAATTATAACC	YIL095W	-10.3661007668446	5.77425890833589	6.42113392374193	0.0112770133555378	0.070519236963026	Activation
AATATTTAAAATGAGAAACG	YKL119C	-10.3655234655639	5.77356220286019	6.11453332208622	0.013407480753972	0.070519236963026	Activation
CGATTTATCAGGTCAGTGGC	SUT348	-10.3564622214551	5.76504345063293	6.51907478029604	0.0106723510017702	0.070519236963026	Activation
GATTATGAGGTTTTAACGCA	CUT589	-10.3376622714791	5.74665592882282	6.18962279476994	0.0128501573939304	0.070519236963026	Activation
GGACAAGATTGCTAGACAAG	YDR197W	-10.3375582975915	5.74671165244142	6.57535424194164	0.0103400421905502	0.070519236963026	Activation
GTGAAAAAGGATAAATTTGG	SUT485	-10.3308519770561	5.74003544374493	6.16319947863277	0.0130435069059676	0.070519236963026	Activation
GAAAATGAAGCTATCGAACA	YDL183C	-10.3292800063277	5.73857136343942	6.19541741395967	0.0128081512504783	0.070519236963026	Activation
GCGAACCACTTGGTCAGGTG	SUT523	-10.3291899411123	5.73891078494943	6.25819649206536	0.0123619987977654	0.070519236963026	Activation
ATATTATATATAGATAGTTG	YKL208W	-10.3277912845478	5.73715792713799	6.26330952907474	0.012326372504452	0.070519236963026	Activation
GTAGGGTCTAAAACAGTACC	CUT813	-10.3227594523949	5.73277591462637	6.06881604684746	0.0137589157661083	0.070519236963026	Activation
GCATACACAATTTCATTCAG	YDL065C	-10.3207594184969	5.73068031247785	6.39333221097803	0.0114549798385017	0.070519236963026	Activation
GTGTTGCGTACTCAAACGAC	SUT831	-10.3150183775086	5.72488443448497	6.37872214968467	0.0115496558336377	0.070519236963026	Activation
AAAGTTAGACCTTTTGTTTC	YJL216C	-10.2916519714472	5.70254386009065	6.40534146314359	0.0113777542705912	0.070519236963026	Activation
GGACAAAGTGTTGTGTAACC	YOR076C	-10.2794996217505	5.69073033861674	6.46454159753256	0.0110048025734464	0.070519236963026	Activation
ATTAAACTTCTTCCTTTCTT	YDL098C	-10.2770638837618	5.68824020456911	6.51034102662793	0.0107248937952793	0.070519236963026	Activation
ATTTCTATATTTTTAAGATT	YBR195C	-10.271437101679	5.68297367992488	6.40363427825564	0.01138869966882	0.070519236963026	Activation
GAATTTGAAGGCGAAGATTG	YLR377C	-10.2697714280349	5.68132878932481	6.41800657453507	0.0112968899309053	0.070519236963026	Activation
CATGATGTTATAGAGTAACG	YKL203C	-10.2624443765516	5.67434754580594	6.35484453738432	0.0117061200646452	0.070519236963026	Activation
ACGTTTCACTTTATGACATC	YNL261W	-10.251032330257	5.66340340883051	6.29719137995939	0.0120929423839006	0.070519236963026	Activation
GTTTTCACGAAGTGATCGAG	YPR111W	-10.2454072226967	5.65801822387428	6.31163232225423	0.0119948356122949	0.070519236963026	Activation
GTGTCTGACCTAAGGCCCGT	YDR235W	-10.2288875049413	5.64201829903979	6.35138285003787	0.0117289836090758	0.070519236963026	Activation
GTTAAAGACTTGTCACAATT	YKL195W	-10.2249293953673	5.63799499583869	6.39206863479916	0.0114631364930666	0.070519236963026	Activation
GAATGTCCATTCATCATAAC	SUT001	-10.2080564713542	5.62193196562303	6.32539019195614	0.0119021296254442	0.070519236963026	Activation
GAACAAAAATGTGAACGCCA	YDR072C	-10.2026269691764	5.61678108371293	6.19973148649307	0.0127769694952748	0.070519236963026	Activation
GGGCAGTTGACCAATGAAGC	YKL113C	-10.1939237141438	5.6081403891005	6.33502489425949	0.0118376454912782	0.070519236963026	Activation
GATTGTGACAGGAGACGATG	YLR016C	-10.1810518993066	5.59562886903665	6.2005042157154	0.0127713925170519	0.070519236963026	Activation
AATTGAAAAGTTAGAAGGAA	YGR195W	-10.1765262074888	5.5914246624794	6.6238271716455	0.0100623379552034	0.070519236963026	Activation
TTGTTCGGTAGACTTGAATG	YOL022C	-10.1693606999087	5.58447231772726	6.3456637248087	0.0117668574371289	0.070519236963026	Activation
TAAATGTATATACTGAGGTG	YJR125C	-10.1688287892422	5.58419590717964	6.25142511749939	0.0124093428247802	0.070519236963026	Activation
ATATAATGAAGGTACTTACT	CUT183	-10.164821147064	5.58010620642041	6.3507787294536	0.0117329783646614	0.070519236963026	Activation
ATTCTTTATGAACTCTGCAG	YFR008W	-10.1619166239887	5.57729865513951	6.3424693680578	0.0117880660925079	0.070519236963026	Activation
AGGGAAAGGTGTCCTAAGCG	YPL192C	-10.1545559150344	5.57033879390007	6.65583724426764	0.00988315228490923	0.070519236963026	Activation
AATTCAGATTGAAAATAATG	YEL061C	-10.1532771834038	5.56923456466834	6.22034641801531	0.0126290400370183	0.070519236963026	Activation
GCGTTAGTATGCCAGTTTCG	YHR041C	-10.1503452589093	5.56626416101107	6.43881618837353	0.0111653028745151	0.070519236963026	Activation
GGTAGTGAAAGCCCACAGAG	SUT345	-10.1481413254859	5.5642020157886	6.37439664256375	0.0115778397752359	0.070519236963026	Activation
AGCTTCAAGCCGCCTCGACG	YKL146W	-10.1469527786634	5.5630601276301	6.37718222291791	0.0115596815358032	0.070519236963026	Activation
GCAGTGTTCGAGAAAGACAG	YLL014W	-10.12873745923	5.5454842625722	6.45643043793616	0.0110551507926468	0.070519236963026	Activation
GGGCACCTTCGGAAGAACAC	YDR178W	-10.1255495822836	5.54250213513797	6.38044713343348	0.0115384359155283	0.070519236963026	Activation
GCCAAAGAAACAGCATTTGC	YBR292C	-10.1227694057831	5.53972542212474	6.48159622386815	0.0108997056697566	0.070519236963026	Activation
GCTCCTGGGACGGTTAACAG	CUT585	-10.1226753913421	5.53961083499163	6.47410366373302	0.0109457501918026	0.070519236963026	Activation
GTAAAAAGGAACCACCTGGG	YLR314C	-10.1192420832141	5.53659470210588	6.12321392503543	0.0133418015061277	0.070519236963026	Activation
ATAAATAATAATAAATACAT	YDR247W	-10.1134909225823	5.53061028741309	6.25608005923217	0.0123767764824402	0.070519236963026	Activation
ATTATTATTAACACTTTCTC	YOR368W	-10.107986919703	5.52562467216339	6.41514317542685	0.0113151204417711	0.070519236963026	Activation
TAATTTTATTGAGCTTTGCT	YPR068C	-10.0968765688101	5.51472262195743	6.49417927167663	0.0108228247955505	0.070519236963026	Activation
CACCGGCAGCATATAGACGC	YMR015C	-10.0949131124767	5.51295653492427	6.50030088610574	0.0107856238432588	0.070519236963026	Activation
GGAAGTTTATAAAAGAAGTG	YBR120C	-10.0825280785228	5.50092875070919	6.36641170356764	0.0116300532847484	0.070519236963026	Activation
AATATAAGTAAAGAATGTGT	SUT783	-10.0702861666948	5.48922668391739	6.50288900667763	0.0107699353493509	0.070519236963026	Activation
AAAGCTAATATACAAACACT	YLR364W	-10.0655251881882	5.48475681666305	6.51099773268589	0.0107209338026497	0.070519236963026	Activation
ACTGGTTCTAAAAAATAATG	YLR419W	-10.0524017301568	5.47193427824493	6.24981489605957	0.0124206285442183	0.070519236963026	Activation
GTAGTAAGAAAGATTGGACT	YMR102C	-10.0521244744397	5.47182608755939	6.53716018690986	0.0105643858251752	0.070519236963026	Activation
GTCTTGACAATATTCTACAT	YIL005W	-10.0395508314895	5.45957713177929	6.17830561300697	0.0129326063043327	0.070519236963026	Activation
GAAAATAACTTATCTAGATC	YFL003C	-10.0313345636761	5.45191101476706	6.85433824587928	0.00884263012231009	0.070519236963026	Activation
GCCAATATTGGGATGATGGG	YGL147C	-10.0211168869875	5.44234524521391	6.15475427008513	0.0131059323694231	0.070519236963026	Activation
AGGGGTTGGAAGAGAACGGC	SUT288	-10.0210700868818	5.44212185444855	6.53208600323399	0.0105945638465994	0.070519236963026	Activation
GCTTCACTGTAGGCCAACGC	CUT360	-10.0143837113919	5.43572106959888	6.70297689328377	0.00962520772254968	0.070519236963026	Activation
AGCAACAATTATAAAACAGG	YDR372C	-10.0135957437629	5.43506438621026	6.34936431243157	0.0117423366812616	0.070519236963026	Activation
GGAGTCTACTAAATACAGTT	CUT562	-10.0077946827767	5.42918992829932	6.35225332943953	0.0117232300076911	0.070519236963026	Activation
AGCTATGACAGCTTGAAAAT	YIL073C	-10.5415222604693	5.94462818345952	6.04845826127561	0.0139184446896317	0.0705632777288307	Activation
AGGCAAACATACCTTTCAAC	YDL084W	-12.5419902728062	7.91205672427417	6.02316948561453	0.0141192678099162	0.0711214787699631	Activation
TGTTCTTGCTTACGGGAGTG	SUT548	-11.8682336733052	7.2448686560637	6.01032290812196	0.0142224246145897	0.0711214787699631	Activation
GGGCGTCCTGATCGTTGCGT	YIL076W	-11.7238010295188	7.10224362260272	6.01496403324911	0.0141850676298968	0.0711214787699631	Activation
ACCCACAGGAATCCCGCCCG	SUT121	-11.6034626027522	6.98356912370438	6.00861971321212	0.0142361592200093	0.0711214787699631	Activation
GAGCCAACAGACACTGTCAG	YJL204C	-11.4102246490814	6.79331629389173	6.01274110053509	0.0142029476718654	0.0711214787699631	Activation
GCTAACGTGCACTTGGAAGG	YJR056C	-11.1692271229777	6.55718046412357	6.0278334219744	0.0140820076077491	0.0711214787699631	Activation
GTTTTTATCTAAATCATATG	YNL154C	-10.9133884674738	6.3067928917458	6.00876395281769	0.0142349955394651	0.0711214787699631	Activation
ATCATTTCGCTTGAGATTTC	YIL084C	-11.0308052742415	6.42103338580483	5.99528726246865	0.0143441451666443	0.0715119752798607	Activation
GCTAATGGCATTAGTGATGT	YDR037W	14.2900994909127	14.3410143094543	5.98066603348948	0.0144635392095361	0.0717354541501124	Activation
GGCACACCACTTATAATGCG	YCL043C	12.5235685141068	10.2179955049779	5.97881641772046	0.0144787155165365	0.0717354541501124	Activation
GCCTCACAATACCCCAGCAT	YKR048C	-11.8219807038601	7.1991586235195	5.98229512539488	0.0144501858877255	0.0717354541501124	Activation
CGCAAGGAAGTAAAAGGACC	YMR136W	-11.6460380180714	7.02553211448915	5.97505558840715	0.014509624115138	0.0717403683053628	Activation
AATAGCATTAGTGATAAATG	CUT648	-5.46069725364597	4.33549535867456	5.9511275878364	0.0147078751795874	0.0723841059460264	Activation
AAAAGTCTTACATGTGTAAA	YMR225C	-13.4286355545467	8.79359826543557	5.9494717499333	0.014721697066267	0.0723841059460264	Activation
TCGCATCTCATCGCTGGAAG	YCL012C	-11.4938197836944	6.87556219320251	5.94843274416058	0.0147303768564057	0.0723841059460264	Activation
GGCAAGCATTTTAACGGAAG	YNL138W-A	-12.4492029563834	7.81998202748256	5.93692835953064	0.0148268366729748	0.0727091090834222	Activation
ACCCTCTCAAAAAACATCAT	YLR408C	-11.6803867007639	7.05939832840419	5.92818013325057	0.0149006223252325	0.0729218210936889	Activation
GTCGTGTGTTTGTATATGTG	YIL046W	-11.7140527729453	7.09260093825389	5.90255703895016	0.0151189199431677	0.0738394501501345	Activation
GATTTACACTAATTAACACA	SUT232	-11.8363193072816	7.21330106361123	5.89557468547213	0.0151789757094114	0.073982080795058	Activation
GAATTTTCATAACAAGTGCG	YJR100C	-12.0505351805349	7.42542831975626	5.85207476166825	0.015558697445135	0.0756790192158901	Activation
GAATAGGTTACTATAGAAAG	YDR500C	-5.9617172347015	4.777824439957	5.84594941435208	0.0156129478433875	0.075711705842779	Activation
GGGTAAAACATCATCTTGCG	SUT735	-12.1275042927551	7.50119883836595	5.84419037480319	0.0156285631326837	0.075711705842779	Activation
AAAAAATGTCGTGAGGTTGT	YLR287C-A	-6.03777557163722	4.84515090121118	5.77778887511843	0.0162299460994428	0.077994811115158	Activation
AAACTAAACACCCCCCTGGG	YCR081W	-13.0843350154757	8.45089329233374	5.78068831413965	0.0162031949115374	0.077994811115158	Activation
CAAACCAAGATAATACCCCC	YOR257W	-12.9070101849855	8.27456298471812	5.7862477810375	0.0161520284816549	0.077994811115158	Activation
GGCAAGTATGTATTAGTGCT	YNL313C	-11.857138890233	7.23429165338098	5.78466920631982	0.016166539904071	0.077994811115158	Activation
GCTAGCAAAAATGCGTTCCG	SUT132	-13.3209441544417	8.68635237246203	5.76436670638151	0.0163543780322687	0.0784355970427609	Activation
GATACGTTAGCCAAATTCTT	SUT253	-5.85858487382425	4.68371751880576	5.72777888689389	0.0166985899411128	0.0799265841891986	Activation
GTCTTATTTTTGGGTTTCGT	YGL175C	-6.15142740966361	4.94573409755264	5.68862725503093	0.0170752067348015	0.0815664257969205	Activation
CGGCCCCAATAAGCTGAGAG	YML092C	-5.99708512064129	4.80693645497628	5.68057283366601	0.01715376640708	0.0817787909426993	Activation
CCCTTATCGGTGCTGCAAAG	YOR066W	-6.21158350131891	5.00014443750107	5.66080692780331	0.0173481397633223	0.0825413475246962	Activation
GATCTCTGGATGATGATAGG	YEL002C	12.078068586356	13.2531568091938	5.57502372615577	0.0182184181836606	0.0865104293156792	Activation
ATCTTGAGATTCTATATCAT	YMR066W	-6.30380101085184	5.08188975957234	5.54306604071072	0.0185540481779282	0.0878702017650704	Activation
CGAAATATTTCGTTGAAGGA	YJL204C	-5.93487924746455	4.7486797510122	5.54080246652817	0.018578061841072	0.0878702017650704	Activation
AGTGATTACTAATGGAATGG	YML116W	-6.49022875625549	5.25221663845778	5.52312041995709	0.0187667544649544	0.0884263336649666	Activation
GTCTTTCAAGGTGGCTGACA	YJR021C	-6.14256775017466	4.93536406220193	5.52287449411332	0.018769392758744	0.0884263336649666	Activation
GCACTACTGGATAATTACTC	SUT428	12.8409519007216	14.5877110444527	5.51774336425313	0.0188245270379741	0.0885121879158076	Activation
GGCATGGGCAAAATAAGACG	YJL044C	-6.40466258855098	5.17326549506501	5.49429232157949	0.019078647987943	0.0895315026909733	Activation
GTCATGACGACATAGCTGGG	YER124C	-6.31975280708938	5.09484719112544	5.45134092657103	0.0195533128600963	0.0915797739033418	Activation
ATATAATAACATTTTTGTTT	YJL049W	-7.11814866495508	5.83366630040558	5.44430868338717	0.0196321829948941	0.0917699314264249	Activation
TCTTCCGTCGTCAGATCGTG	CUT854	10.8726172601698	11.8540103286708	5.40999098386317	0.020021819418623	0.0933528155844035	Activation
CTGAAAATAGCCTTATGTGT	YJR137C	-7.12939994644515	5.84339153601543	5.40765196436321	0.0200486655654578	0.0933528155844035	Activation
GAAACCTTTCGGTAGCCGTG	CUT668	-7.08395780102459	5.80068582288733	5.40155431318346	0.020118826655155	0.0934979579826778	Activation
GAGATAGCTTTACCGGTAGG	YOR234C	-8.04779236416726	6.71285392312482	5.39168375802582	0.020232938435332	0.0936652246485062	Activation
GTTGTATATACTTTACGTTC	YKL171W	-7.16320078888227	5.87477154182878	5.39400437981489	0.0202060500746348	0.0936652246485062	Activation
GGATTGCATAGTTGACACCG	YGL156W	-7.30116443568503	6.00399159020029	5.37538973449448	0.020422777761943	0.094361890314334	Activation
GATTAATTATATATACGTAA	YGL250W	-7.56064105852192	6.24876082458773	5.36832170113752	0.0205056985025346	0.0945628173251498	Activation
GTCATATACAGTGTAACGTG	YLR011W	-7.52072039630867	6.2104188481822	5.3448077672113	0.020784075037135	0.0954793332165705	Activation
GTGTAGTGTGACAAAAGGTG	CUT702	-7.406682990931	6.10284452381106	5.34700375216561	0.0207579124840253	0.0954793332165705	Activation
GACTGTTCCCATCTTTGCTT	CUT678	-8.32472942428629	6.97639809097577	5.32698543672305	0.0209976733203466	0.0955114225474215	Activation
GTAAAAATATAATATAAACA	YOR016C	-7.98823952634843	6.65448303515011	5.33472882430315	0.0209045921092033	0.0955114225474215	Activation
GTGAAGAAGTATACGTGCGT	YHR067W	-7.86934859508281	6.54100015311433	5.32430135395748	0.0210300379920928	0.0955114225474215	Activation
GAGAGTCCTGGAATTTCCAG	YLR441C	-7.73270396758772	6.41098454131971	5.32432919476169	0.0210297020227977	0.0955114225474215	Activation
AGCGTTGGTTCGAGGCGTTG	YOR134W	-7.61557397987507	6.3000026002631	5.33292155535444	0.0209262785390599	0.0955114225474215	Activation
GTGCGTTGCGCGGGGTTGTG	SUT135	-7.25416890970538	5.95871883871413	5.33105751796654	0.0209486705577078	0.0955114225474215	Activation
GCATATAAATTTTGATAACA	YBL060W	13.4171649995007	15.6089384928779	5.31681113156786	0.0211206284649708	0.0955399633339771	Activation
GATCAATATTAGGGAACTGG	YLR137W	-7.68387955637073	6.36443845423928	5.31726071780903	0.0211151795679442	0.0955399633339771	Activation
AATTTCCTAAAATTGTTGAG	YCL038C	-6.75713058583384	5.49417587993872	5.31390817715629	0.0211558467599424	0.0955399633339771	Activation
GTAGGGCGTACCCATGAAGG	YNL045W	-6.26336622724991	5.04063308949879	5.30940537015779	0.0212105945910553	0.0956071538145687	Activation
ATCTTCTACTTGGAGGCTCG	YAR019C	-7.77410892577815	6.44960813227179	5.29501005448134	0.0213866074939998	0.0959871426502756	Activation
GGTATTCACGAAGCAGATGT	YOR244W	-7.49344194458539	6.18311312027355	5.28468904597626	0.0215137336814178	0.0959871426502756	Activation
ATGATCCGTGACGGAAGGTG	YKL207W	-7.43405809232495	6.12753344590386	5.29870125083675	0.0213413312234874	0.0959871426502756	Activation
ACAATTCAGTAAACGCCGTG	YMR055C	-7.15635136655067	5.86568592823079	5.28333681154243	0.0215304473314605	0.0959871426502756	Activation
GATATTATTATAATTAAAGT	YOL083W	-6.93384325518481	5.65770977748902	5.28296351144827	0.0215350636971844	0.0959871426502756	Activation
GATCCAATATACTCTGTGGT	YKR047W	-6.90800899525408	5.63377349774567	5.28873298056899	0.0214638306644406	0.0959871426502756	Activation
ACTTTGGTTTATTTTCGTGT	YER076C	-8.35038105963019	6.99930999216714	5.26398175384644	0.0217711552954881	0.096805626165303	Activation
AGCGTCCCGATATTCTCCGG	YKR097W	-8.33036555515346	6.97999286524712	5.26079565968137	0.0218110453004979	0.096805626165303	Activation
GCCAAAGTTGCTGTATACAC	YDR328C	-8.21255122251244	6.86680962460493	5.25164838052706	0.0219259907021868	0.096805626165303	Activation
GGTAGTCTTCGTTGGGATTG	YGL140C	-7.69038733591898	6.36877411182572	5.2488794105208	0.0219609093552647	0.096805626165303	Activation
GCCAGTTCTTCTGGTGTCTG	YBL006W-A	-7.64307149876636	6.32419609621488	5.25345696868985	0.021903214188844	0.096805626165303	Activation
AGCGAAGCAAGGGACTGGAG	YIL091C	-7.02900170400161	5.74583451059164	5.25298849645714	0.0219091115563405	0.096805626165303	Activation
CCGATGCTGATAGAAAAAGG	YPR023C	-9.37072700452079	7.98319283325156	5.22529238206612	0.0222607037085846	0.0977677060314761	Activation
GATACCATTTCACCAGCTTG	YIL076W	-8.24950294048033	6.90150419847043	5.22551666094388	0.0222578332168055	0.0977677060314761	Activation
AGGAGTGAATCCACATTTGG	YIR036C	-8.06083974231807	6.72064020022122	5.21406203162112	0.0224049298216191	0.0978634275268537	Activation
GACAAGTTGGTCAAGGACAG	YER042W	-7.61340022456643	6.29489986105741	5.21578694011643	0.0223827148546852	0.0978634275268537	Activation
GCCATGATTCAAAGAAAGCG	CUT792	-7.35611125456423	6.05206701807473	5.21983873752337	0.022330621780346	0.0978634275268537	Activation
GATATAGAAATGCTTATGTT	YHR168W	-6.91681373145007	5.64015518856792	5.21043114725249	0.022451766396749	0.0978897014898257	Activation
GAGGAACGCTTAAAACATCG	YDL079C	-6.91891685829545	5.64197316234435	5.20627202051389	0.0225055417181146	0.0979193825358725	Activation
ATCGTACTTGACCTGCTCGG	YBR197C	-6.45814128419935	5.216132105152	5.20359370812082	0.0225402415178489	0.0979193825358725	Activation
GTGTATTAAGTCAACTTTTC	YOR353C	-7.68838511212651	6.36576464232562	5.19698867324382	0.0226260524778526	0.0981144192439251	Activation
GATGGAAAATATAATTTTAT	CUT732	-4.56668289060602	4.33150373633004	5.19218446045435	0.0226886802297111	0.0982084028715653	Activation
GTGACAACACTGTATGGGAC	SUT621	-9.77919580187738	8.37895166857377	5.18822481424287	0.0227404332497925	0.0982550611405449	Activation
TGTCCCTTCTTGCTTCGCGG	YIL093C	-7.0639148647189	5.77664450133592	5.1756181036313	0.0229060207559809	0.0987925139799319	Activation
ATGATCTTTACCTCGCCACG	CUT640	-6.59087398476354	5.33718529331476	5.17118132050763	0.0229645942199502	0.098867319460396	Activation
GAAGTGGTCTTACCTATACC	YOL093W	10.4415593870439	9.76815814767679	5.16757993727335	0.0230122530630385	0.0988949513354233	Activation
GAGATTGCCTGGTAAGCCAG	YML042W	-7.41215973273453	6.10354286426895	5.16364393797764	0.0230644573194785	0.0989419832774765	Activation
AATCTGAGATCAAATATATG	YGL031C	-6.26696770745756	5.04008097243608	5.15862737014685	0.0231311714639307	0.0990509806616176	Activation
GAACAATAGATGATATGAGG	YER100W	-8.81569555481636	7.44422782635947	5.15479499666305	0.0231822720619015	0.0990928492057749	Activation
CTACAATTAATCTCTTTTTC	YFR012W	-7.49107658394479	6.17743448769213	5.14992334640966	0.023247399303617	0.0991944190926576	Activation
ATCTGTTAAACCTTAAAGGT	YIR006C	-6.90008760825054	5.62300581169722	5.1440122536927	0.0233266772683088	0.0993559006916598	Activation
ACACAATCGTTACGACATGG	YJR109C	-8.49283839375774	7.13273095442304	5.14072062767469	0.0233709451184357	0.0993582410991988	Activation
TGAAAGCCGAAACCGAAACG	SUT408	-8.14496132015475	6.79900462199015	5.13781499019523	0.0234100943373842	0.0993582410991988	Activation
GGAAGAGTTGATGGATATGC	YMR278W	-7.0350164087907	5.74861612013504	5.13396672362367	0.0234620488042182	0.0994028145450799	Activation
AAAAACTAGTACTCGATTTC	CUT519	-10.0007190946392	8.59284750380005	5.12812556767865	0.0235411373563459	0.0995619883254278	Activation
CGGAAATCTCTGCGCAATGG	snR8	-4.588708292356	4.3475768796935	5.12068499147362	0.0236422824471643	0.0998137206132042	Activation
GGTGCTGTATTGTGGAAAGT	YKL024C	-4.58575829977925	4.34742692361175	5.10933882168386	0.0237973875812655	0.100291977890817	Activation
GCCACGAAACTGTTAATGCT	SUT375	-5.04547496918208	4.74010942422115	5.09196354977329	0.024036960977682	0.101123916534178	Activation
GCGCTGTTCTTCGCTGCGAG	YJR016C	-7.97469195012197	6.6352948657682	5.08564888859653	0.0241246473703219	0.101315068991299	Activation
GATCAAACCCGTTTCTGCAG	YGR108W	-8.99578564266677	7.61576965578092	5.07625759746286	0.0242556706285188	0.101612557944356	Activation
AATTTAGTATTTATTTATTT	YNL177C	-4.96638435126473	4.6718554592364	5.07450300210318	0.0242802317356613	0.101612557944356	Activation
CGCTCACATACGCTAAAAGG	YNR018W	-9.2316812061247	7.84364893704106	5.06260500196118	0.0244474641452336	0.102134179477823	Activation
GCAGTTTTAACATCGAATTC	YLR115W	-7.7269670717369	6.39832144501637	5.04056507873723	0.0247604119293915	0.103261683142054	Activation
GAAGACAGCCGTAAATTCAT	YDL213C	-7.19562209746468	5.89587858140944	5.02009753302061	0.0250547577335714	0.104307828203306	Activation
GGTGCTTTAGATGATTTCAG	YGL032C	-8.38891194295922	7.02911280094196	5.00786729649363	0.0252323737389921	0.104782659856907	Activation
ATCGATATGAAAGATAATGT	CUT872	-6.52659075585072	5.27430435223619	5.00623319737258	0.0252562040856099	0.104782659856907	Activation
AGATATAAGGAAACAATTGG	YJL140W	-8.20187589841788	6.84921627248927	4.9859852950822	0.0255534292807565	0.1058326829279	Activation
GCTGCTGCTGCTAAGGCATC	YKL105C	9.96179151560877	10.3847457208498	4.94633480018494	0.0261460423316489	0.10808200590385	Activation
GGGGGTTTCTCTGAACGCCG	YKL109W	-8.85700177977302	7.47808873159127	4.94365048119423	0.0261866744912998	0.10808200590385	Activation
GCGAAATTGAGTGCGCTAGG	YLR046C	-8.78600953450252	7.40873250464967	4.92496040461893	0.0264714087569	0.10906948144166	Activation
GCGAAAATCGCTTATAAGCA	YNL231C	-8.24217707135876	6.88479657301711	4.88268400342611	0.0271274054478732	0.111580648823328	Activation
GGTATAGGAAACTTGAAGCG	CUT687	-7.33208804139234	6.82199345874176	4.81240120576505	0.0282556473006719	0.116022332580499	Activation
ATTATAATGTTGTTCAAGAT	SUT835	-8.95103453519942	7.56409589129942	4.79800837484071	0.0284926562938279	0.116795538107007	Activation
GGCAATAGATGTGCTAGATG	YGL210W	10.810762051389	11.9668021605616	4.78316308790546	0.0287392848856091	0.117498194145426	Activation
ATGAAAGAATATAAAAATGA	SUT714	-7.40102452728549	6.88610605026738	4.78179838136792	0.028762068375048	0.117498194145426	Activation
GTAATACACACCAGTAGTGC	YPL096W	-6.34643172665839	5.89947074244915	4.76710322299931	0.0290085958464906	0.118303763333137	Activation
AAATTACTGATCCTAAATAG	YJL110C	-6.67133095443594	6.20035622930344	4.76331295598041	0.0290725379985232	0.118363236197723	Activation
TGTGTCTGTCTGAGGACGGG	YNL054W	-6.78390615083854	6.30469993125071	4.74889783700327	0.029317066145891	0.11915648240313	Activation
GGAGATGTTTCTCCGCCGCG	YPR138C	-7.6285276401908	7.10048291648256	4.74587423216037	0.0293686277131091	0.119164076575356	Activation
GCTCCGTTAACGAAGAGAAT	snR81	-8.58522442962291	8.01549137942145	4.74214522811541	0.0294323485701775	0.119220898431226	Activation
GAGCATATATAGTTTAAACT	YDR398W	-5.51009828789039	5.13818675636174	4.70116841975577	0.0301421192726113	0.121890053989413	Activation
GCTTCAATGATGCGTTTGGT	YPL071C	-6.42168253862755	5.96618111152251	4.68869805949915	0.0303616441052747	0.122571081758331	Activation
GTCCAAGGCTCCCAAAAGCC	YGR049W	11.21892285691	12.503890177723	4.68440771323507	0.0304375549371204	0.122671019729773	Activation
GACGCCTAAACTGGAGACTC	YIL157C	-6.44833216841406	5.99014481396598	4.66983010464908	0.0306969640227219	0.123508925715583	Activation
GAAAATAAATGTTTCGCCCG	SUT377	-6.63850820994573	6.16611053914932	4.65906806724746	0.0308899532004283	0.124077232453312	Activation
GAGCAGGATATTCAAATCGG	YLR054C	10.451596963885	13.6633563215762	4.64878802761118	0.0310754806341751	0.124613716656776	Activation
AGCGAAAATGGATAAAACGG	YDL100C	-8.05477351643969	7.50173337537566	4.61582419971536	0.0316782682370993	0.12681884346004	Activation
GGAACAGAACCTTTAATTGC	YAL030W	-7.86518071785681	7.31968322256887	4.59044849871691	0.032150600300406	0.128495232533956	Activation
CCGCACTGGCCACAGAACGC	YNL052W	10.7598880250868	11.8694347142795	4.58714927318388	0.0322125483473423	0.128528603888397	Activation
GCCGATTCAATTCGTTATGG	SUT818	-6.82283980736099	6.80797357467679	4.50094095707172	0.0338762075033585	0.134942102314042	Activation
GAAAAATGTAAAGAATATAT	YLR168C	12.0284187713709	14.2524052838478	4.4183495212856	0.0355544109906407	0.141392168417175	Activation
TGCGCGGGGCTACTACAGCG	YLR399C	11.01914966495	13.7550626606559	4.38732852665883	0.036207003431495	0.143748997067426	Activation
GTGATGAATCAGACATTGTC	CUT577	10.9735620611687	13.2311453581382	4.35784397372555	0.0368389010653869	0.14601600785917	Activation
AGTTTCTTCTTCCCATGAAG	YLR140W	10.2656994278735	13.6895500634372	4.34953429592211	0.0370190677407259	0.146250824528715	Activation
GTTATTGTCTTTATTCATGT	YLL040C	-6.41973768303656	6.42556787953191	4.34948583558781	0.0370201211380024	0.146250824528715	Activation
GATAAATTTAGAGGATTACT	YDR409W	-6.10841930232467	5.66557629523634	4.34598915170899	0.0370962125543858	0.146310390962857	Activation
GGTTGTAGTAGTAACTGTGG	YGL125W	11.0742344261659	14.0502540982878	4.33912804374606	0.0372459937186465	0.146512860065292	Activation
TGCCAAGAGGCTGACTGCTG	YPR144C	-6.27651680077942	6.29260913917378	4.33804278477015	0.0372697433860835	0.146512860065292	Activation
AAAAAATCCGGAAATAATAT	YMR217W	10.9548814653724	13.5326953723153	4.32217469283845	0.0376188162219715	0.147643079051207	Activation
GATCAGGATCCTAGTAAACC	YOR206W	-6.84876123842247	6.82266526428669	4.27333075545456	0.0387149724139151	0.151696901713347	Activation
GAAACGAGGAGAAAAGAACC	YGR130C	8.51576688762656	9.76031646359902	4.26987233881431	0.0387938449142016	0.151757977331575	Activation
CAGCCCCAAAAGAAAGCGCG	YLR297W	-5.72445868848344	5.7841103742534	4.2604351374309	0.0390099277323718	0.152354734042716	Activation
AATACGTGAATGAATTAAAT	YPL266W	11.6937454931253	14.1597393619769	4.24209342465371	0.0394335151815525	0.153758649439615	Activation
GATCTCAACAATCTCGATGG	YOL069W	-6.00536165114946	5.56707273850534	4.22331260273955	0.0398722464596965	0.15521695943239	Activation
GATTGATCAATTGCGTAAAG	YGR131W	10.1645008941774	12.0511425632944	4.19779952604451	0.04047646964023	0.157313734517458	Activation
ATCCATTATTGTGTTATTGT	YLR092W	11.8382088190954	14.3185858698488	4.16475930027453	0.0412732770002817	0.160151000399152	Activation
ATCCCATCTTGTCACTGCGC	YKL054C	11.8569902598752	14.4419413839564	4.16119756416195	0.0413601511444514	0.160228824627455	Activation
TAAAGCTGGCTAGTTCAGAA	YLR426W	9.4940852042905	10.9748619195937	4.15301212613348	0.0415605305831837	0.16074540699754	Activation
ACGCCGTCTCATGTGATTGT	YKL106C-A	10.6554641466056	14.3635264503286	4.14132134772285	0.0418484911077832	0.161598521218139	Activation
ATTTTTTCTTGCGTGCAACG	CUT586	7.67846653036569	7.84231279178366	4.13410120815317	0.0420273799982358	0.162028387838858	Activation
GATCTGGCTACTGAAAAAGT	CUT178	-5.60147733465858	5.66629003952964	4.1053407770559	0.0427479758008893	0.164541967849972	Activation
AGCCATAATTTCCCGTACGG	CUT634	-5.47572783352121	5.55117567340155	4.05518340521231	0.0440359351702888	0.169227840606334	Activation
AGAATTGCCATCGATAAGGG	CUT225	8.99309849651542	11.9045395836894	4.04133895824193	0.0443985821992671	0.17018851956964	Activation
AAATTCATTAACCTACTACT	SCR1	8.76538917288419	12.2959546945659	4.03768272303358	0.0444948788696621	0.17018851956964	Activation
GATTTTATAAAAGCATCGGT	YGR285C	10.4584242460216	13.7907303778165	4.03753276519388	0.0444988330984838	0.17018851956964	Activation
CTTCCGTGCCCATCAATACC	CUT468	-6.88528213624693	7.18666187679459	4.02325410074987	0.0448770462867354	0.171361714961133	Activation
AGTTCTAGGAGACAGTGACG	YOL053W	9.55506345243023	12.1425065507989	4.00864726139335	0.0452674564804859	0.172303747047945	Activation
GTTCAAAAGAAATCATTCAA	YNL301C	-5.3356276375805	5.42425946265488	4.01106762683819	0.0452025187498637	0.172303747047945	Activation
CTTTCAGTTTCCATATGAGG	CUT124	-6.08570403477771	6.70420096494264	3.97302850817149	0.0462345467138251	0.175705931885503	Activation
GCTATAGTAAATTCATTACT	YEL030W	9.31580417844554	10.8670919470711	3.93891151444641	0.0471812966620999	0.179020173094487	Activation
AGATTTAAACTCCGTACACC	YPL075W	9.46701963582842	12.1519820567647	3.92168949372774	0.0476669536804743	0.180577179977531	Activation
TATATGTAGATAAAAGGAGA	YPL228W	10.1445406946005	13.2942243003155	3.91717324960212	0.0477951815398313	0.180777358568636	Activation
GACTTTTGACGCGTTAGGCG	YJR057W	8.8366454757728	12.6327050600291	3.90989112855687	0.0480027069096913	0.181276364046362	Activation
AATATGATCTTATTTTGACA	YPL161C	9.37431078187763	12.6640831946988	3.79584016178571	0.0513800815889095	0.193283634715139	Activation
TTGACCTTTTATGATTCCTT	YGL085W	10.4008014059092	12.9178094946801	3.79905497857826	0.0512815182926121	0.193283634715139	Activation
GCCTACTATGGAAAATTCCA	YKL137W	-5.69896908739818	6.33976582484855	3.7944069754195	0.051424086300358	0.193283634715139	Activation
TTTAAGGTCTTAGTTAGTTT	CUT310	8.27017273449192	10.8187558571188	3.75612503415884	0.052614377384165	0.197448007773439	Activation
GAAAAGTGTGATATAAAATG	YBR052C	9.57939365101653	13.6888218414557	3.74139006834667	0.0530802689820658	0.198885132842178	Activation
AGAAAACGGCAAGAGGATCG	YOR239W	9.84775594935432	14.4261179637059	3.73680647802968	0.0532260824744449	0.198937242754868	Activation
GACGTTTTACGTCGATGTTG	YBR214W	9.84613647966211	14.5994234094593	3.7357391933138	0.0532600958501356	0.198937242754868	Activation
AATACTACGTAGATGAAAAG	YGL247W	8.1826546685197	12.2458107932089	3.71824731120319	0.0538208382918123	0.200096698021342	Activation
ACATTGCTCCGCTACAAACG	YDR476C	10.3786928581485	13.5837478972238	3.72057634979388	0.0537458161182586	0.200096698021342	Activation
GGAGTTATAGATACGCCTCG	YKL122C	10.1517097905341	12.6689482236711	3.71889156315343	0.0538000747818932	0.200096698021342	Activation
GGCGGCCACCGAAGGCTCAG	CUT907	9.68982902312359	14.1696791917405	3.70433426637184	0.0542713174903793	0.201147788781962	Activation
GAGTAATTCGTCGCTTTCGG	SUT559	8.18980902184532	12.153282299379	3.70669594333668	0.0541945700449846	0.201147788781962	Activation
AAAAATTTTTTCGATATTAT	CUT538	9.34515076751318	12.7135856878434	3.69308783363361	0.0546383763923571	0.202195720044556	Activation
AAAATTCTCAAGTATATGTG	YMR294W	9.91714766551763	12.4613230247484	3.68166033195329	0.0550140413566894	0.203225956713082	Activation
CCAGTTGTAGCAATCTACGC	YCR069W	10.4402216032895	13.4526080502724	3.67947270867441	0.0550862685002098	0.203225956713082	Activation
ACAGAGCGTTCATGTTGTTC	YKL031W	10.259987171897	13.3273904692023	3.62873768241549	0.0567898746751672	0.209189123611445	Activation
GTGAGGTATGAATTATGGCG	YDL171C	8.45212285126257	12.0724130881941	3.62506514006239	0.0569153439758597	0.20932974670876	Activation
GGGCTACCGTTTAAGAATAC	YDR381C-A	8.91836802129429	14.7195985390625	3.62249972282083	0.0570031638304467	0.209331679732636	Activation
CCGACGCTCAGATATTGGTG	YGR150C	-7.3309242960187	8.60152368286684	3.61971624972012	0.0570986109464392	0.209361573470277	Activation
CAGCCGGTTTACGTCAGCGC	CUT616	9.97476971781637	12.9035630081076	3.59205462936888	0.0580564219578412	0.212548549396799	Activation
AGGCAAACAATATATTATGC	SUT149	9.20997707474887	14.3322234374611	3.57204173178755	0.0587600217377327	0.214143665846631	Activation
CGCATTTCAACCTCCGATGG	YOR221C	9.15604586161623	13.6633477402433	3.57707253099355	0.0585823039432514	0.214143665846631	Activation
TTGGTTGATAATTTTTGTTT	YDR503C	10.0322537334252	13.3242780241656	3.57232397869315	0.0587500359400295	0.214143665846631	Activation
AATTAAGTGAGTAATCTCGC	YGR019W	9.07764624181313	12.7006029172432	3.55379198575173	0.0594095367446944	0.21585465017239	Activation
TGCTCAACGCAAGTAATATC	YBR192W	7.53998680776789	10.3661731391649	3.55622923950582	0.0593223541750614	0.21585465017239	Activation
GGTTAGCCGGAGGAATTCGG	YML091C	-6.72487374593003	8.15205076350659	3.54962996020667	0.0595587309314273	0.216069344589354	Activation
GCCGTTTCATCGCAGCTGGT	YIL052C	9.69867731454324	13.0618000445536	3.54255228246316	0.0598133567336503	0.216382038029718	Activation
TTTAGTTTATATATTCTTTT	YPR156C	9.53776925119434	12.4538776897468	3.54221852515534	0.0598253924994591	0.216382038029718	Activation
CCACTCACTAAACAAAGGGT	YPR155C	-6.72244247082113	8.15022741481225	3.53802611155301	0.0599767965181073	0.216602948871116	Activation
GGAAGTAATATTGAAAGGAA	YDR307W	9.40730448249551	13.774792672042	3.51752202746111	0.0607231715299295	0.21887923078211	Activation
ACAATGTCCTATCTGTGGGA	SUT419	8.6955720131415	11.3819235609564	3.51570892937803	0.0607896445791849	0.21887923078211	Activation
ATCCTTTTGAGTGCCGGACT	CUT178	-6.48992388805759	7.73222646471733	3.50220527792573	0.0612871678493696	0.220339772867749	Activation
GATAAAACGATACCAAAGCC	YFL022C	-4.88615498183839	5.80915089086247	3.48506540227075	0.0619249143557511	0.222299318301034	Activation
AAATGATGAGACTGACAACG	YDL131W	9.47497758437754	12.37768295992	3.46950891869701	0.062509865918147	0.224063764531714	Activation
GTTATCTATGTATCGGGACA	YLR347C	9.66772600927846	12.7402197203497	3.46483545947616	0.0626867440423251	0.2243624062888	Activation
AATAGTAAAATATTTCAACT	YPR174C	8.14939087941304	12.5681111988047	3.46118019786756	0.0628254577273689	0.224523766960105	Activation
GAAAAGCTACTCGGCTGCGG	YBR140C	9.85159711422539	14.0107681216716	3.45811623876429	0.0629419840582132	0.224605472874398	Activation
GAGCAGTGCCCAAGAAGAAG	YER077C	9.29610435231715	13.7988626915202	3.44996668360288	0.0632530447781796	0.225282380318606	Activation
TGCTTCGCAACTTAGTCGTC	YKL196C	8.65940139617653	14.9440551985263	3.44822936764184	0.0633195681129026	0.225282380318606	Activation
CGTTAGTTCTTGGAGTATGG	YDL176W	9.59135421834169	13.5448183706187	3.44065076799777	0.0636106328101084	0.225982662931319	Activation
AGGCATAGTGCCTTCCCATG	SUT674	10.3527526436292	12.7970590267041	3.43530633741992	0.0638167492366303	0.226045147222215	Activation
GATAATTATGAGTGACAACT	YML011C	-6.54517653380551	7.97396303099893	3.4370237679113	0.063750436264925	0.226045147222215	Activation
GAAGATCTGGGTTAAGTGCG	YOL141W	9.6751539102958	15.8635180941354	3.41860742797466	0.0644653716374164	0.227838761886988	Activation
ACTAAAGTTTTTTCTAGCTC	YDR180W	10.2270586942585	14.4276876785649	3.41738461269033	0.0645131440038636	0.227838761886988	Activation
CCTCCTCGGCAGGAGTTGGG	YDR246W	8.26240654064215	13.7316256959013	3.39610880910935	0.065350411527389	0.230012491079614	Activation
GTTTTGGCAAGCATTGGAGC	YGL141W	-7.64537831273565	8.74942567529729	3.39444444713166	0.0654163965455783	0.230012491079614	Activation
AGAGTGTTCTCTTCAAAGTT	SUT591	-6.40224411191541	7.64963824341705	3.39638015849543	0.0653396603923334	0.230012491079614	Activation
GAATGCTGTCTCAAAGGACG	YPL248C	8.46904698241495	14.5036968408639	3.38158196285153	0.0659287457211995	0.231269974307484	Activation
GAAATTTCCCCATGCGCTGC	CUT678	-6.14463438017935	7.38012593931249	3.38062799872712	0.0659669151068886	0.231269974307484	Activation
GTAACGTTATGCCATTGATA	CUT267	-6.25931355330155	7.68255629005382	3.37218527057093	0.0663057504563949	0.23211852495538	Activation
CCTCATTTTGGTCTTCATGG	YBR111C	9.93198064617771	12.4666198356693	3.35079588469495	0.0671725284535182	0.232156679350276	Activation
GGGAAATACGCATATCAGTG	CUT549	9.81285579080742	11.9021095364566	3.35488252241438	0.0670059916592717	0.232156679350276	Activation
GGGATTTCTATCCCTTGCGA	YGR248W	9.67140977133081	13.5618830070481	3.35953651909801	0.0668168712887875	0.232156679350276	Activation
TATATTGCTGGATTATCAGG	YNL012W	9.03176829523336	17.0958309891916	3.35156055959722	0.0671413331626355	0.232156679350276	Activation
GGGGGTAATCTATAAACTGG	SUT462	-6.37165478919615	7.62125417349357	3.3558014426788	0.0669686050350865	0.232156679350276	Activation
GGCAGTGGTGACTTGTGCAG	YGL220W	-6.18635955377767	7.42672855178546	3.35335284999577	0.0670682764445877	0.232156679350276	Activation
CATTTAAATCTTGGTTTAGA	YGL150C	-5.94760131469932	7.17379904682785	3.36191241450712	0.0667205440897449	0.232156679350276	Activation
GCGACATTTTCAAGCGATCG	YER141W	-5.60107649156716	6.80642051977274	3.35111526698473	0.0671594972117039	0.232156679350276	Activation
AGAAAAGGCTAAAATATCTT	YLR291C	-4.95824665419603	6.04870328996982	3.35041768354452	0.0671879630813559	0.232156679350276	Activation
ATAAGAATATATTTTGGAAT	YMR199W	9.82353834927111	12.0910906632582	3.33518128535336	0.0678129335437833	0.232752130476163	Activation
AACACCCAGAGACCTTGGCA	SUT329	9.78194572960256	12.0703508500674	3.31016950842029	0.0688523896681279	0.232752130476163	Activation
GGACGAGTTACAACGATGCG	YDR130C	9.49229529561278	13.3064998958012	3.31931884425459	0.0684701922182828	0.232752130476163	Activation
CCTCGCGCTATATGAATTCG	YGL156W	9.31650183679765	13.3034209975881	3.32909752434397	0.0680642124683675	0.232752130476163	Activation
TGCCAGGTGGCAGGCAGACG	CUT079	9.12660672388411	12.2887819801738	3.30740362559415	0.0689683783619206	0.232752130476163	Activation
GCGGTTTAACAAAGTGAATT	YJR093C	8.42951824374373	16.1777588102519	3.30409532685384	0.0691073881980936	0.232752130476163	Activation
GAGTACAAGCTAGTCGTCGT	SUT333	8.39461570351935	12.617980937782	3.32475325153974	0.0682442541728238	0.232752130476163	Activation
ACCTCCCACGATCTCTTGGC	YNL076W	7.07002197633652	8.71555173196161	3.30615166948442	0.0690209484910527	0.232752130476163	Activation
GTGACAGGTGTACACTTCGA	YJL074C	10.2994661667109	13.2276304800751	3.34228762504281	0.0675206741082166	0.232752130476163	Activation
GACGATACGATTCCTAAAAG	YBL007C	-6.4194301146142	8.24519952835066	3.32214920422388	0.0683524190035493	0.232752130476163	Activation
GATAAACACATTTGAAAGAT	CUT754	-6.27395270340705	7.5225492267435	3.31438089219741	0.0686761837832484	0.232752130476163	Activation
GATGATATTTACGAAATTAG	YNL259C	-6.25409625675014	7.50183371163593	3.31288480851376	0.068738725175772	0.232752130476163	Activation
AATGAAAGTATAAGAGGCGT	YLR459W	-6.04626312718652	7.28256341444674	3.31896195909451	0.0684850578566663	0.232752130476163	Activation
TGGAGACGTAAAACAGGCGT	YKL096W-A	-5.95186765536439	7.18163430251967	3.33029852294694	0.0680145285983347	0.232752130476163	Activation
GAAGAAAAGCATACTTGCTA	SUT441	-5.88689433415374	7.11517258199206	3.306968890168	0.0689866282161851	0.232752130476163	Activation
CAATCCACACCCTAATTTGG	YLR136C	-5.64553031729142	6.85757225743339	3.31830129488376	0.0685125861714095	0.232752130476163	Activation
GAAATAAAGATCAACTTATC	tD(GUC)J1	-5.58690865551311	6.79437785102405	3.32432362897001	0.0682620868737754	0.232752130476163	Activation
GGATGTCTATAACGCTTTGG	CUT167	-5.49052206987373	6.69338909413177	3.30683457204931	0.0689922678308939	0.232752130476163	Activation
GAAAAGGGTTACCCATCTGG	YDL215C	-7.10536702747197	8.18855709951366	3.30072585876148	0.0692492765118619	0.232902896318997	Activation
GCACGGACCATTAAGTTACG	YMR182C	10.076844661985	15.0496998173243	3.2873536448751	0.0698154621415994	0.234150319182595	Activation
GTGAAGACGAGGACGCACGG	YBR018C	-6.04668745296376	7.28591344524141	3.28841143252136	0.0697704949466348	0.234150319182595	Activation
ATTCTATAACAATTTAATAA	YDR078C	8.84206348535948	12.0121891999266	3.27623499615054	0.070290004374783	0.234756866978732	Activation
GCATTATTGAATTTGAAACG	YMR059W	8.32360409636478	15.5625116424405	3.27652004279091	0.0702777955830351	0.234756866978732	Activation
GGTGTGACACCACCAGCCAG	YAL054C	7.61887799234672	11.0206216361712	3.27710644053825	0.0702526868058646	0.234756866978732	Activation
TGACGACGAGAGCGTTACGG	SUT567	-5.42831670022765	6.83340845329118	3.26741759488072	0.0706687853557091	0.235693667987469	Activation
CCAACTTAATCTTTCAGATT	YPR100W	7.72611820598585	12.9880301088279	3.26045170111698	0.0709695745273873	0.236040276999549	Activation
GGGCGATGTGCCTGAAAACT	SUT621	-5.45626055782261	6.66206798203477	3.26047701648048	0.070968478923245	0.236040276999549	Activation
AATCAATGACTTTTTGTTTT	YOR355W	-6.25902455316027	7.51400980406648	3.23874711211333	0.0719156139227362	0.238525092927692	Activation
GGTGATTTCGGTATTGACCT	YKL066W	-5.41392874036145	6.61913977669502	3.24040675364007	0.0718427998973725	0.238525092927692	Activation
GATCTCTGACATTAAAAATT	SUT446	-5.00697397104171	6.24590017739256	3.23558374521611	0.0720546206215004	0.238656050069555	Activation
GGAGTCCATCGGTAAAACTG	YCR076C	8.85217981086745	11.3399766452756	3.22698518701529	0.0724339218380832	0.238922344659867	Activation
GTGGCGATGAATTTACAGGG	YER142C	8.80757635610125	12.1859458155845	3.22911712130075	0.0723396783583644	0.238922344659867	Activation
ACAAAACCCTTTTCTCAGGG	YNL111C	-6.88628458405591	7.96393586921646	3.22891957703147	0.0723484053954114	0.238922344659867	Activation
GATGCCGACATATAAAAGGA	YDL222C	9.68157449506797	14.0775999169634	3.22204448343001	0.0726528352584008	0.239315245809952	Activation
ATTATAAAATAATTGATGGA	SUT422	9.08760894977407	13.077128019772	3.207693987674	0.0732927131588664	0.241091805425187	Activation
GAACAATAACTGCCAAAACG	YGR180C	-6.24560913750776	7.50446656685822	3.19099198026594	0.0740450671969031	0.243232974161882	Activation
GAGATTACCGTTGTGGTACA	YAL042W	9.93575031873833	15.843313261377	3.18050019437763	0.0745219140164328	0.24403164226946	Activation
GATAATTCTACCGACAACAG	YLR407W	9.14407337314424	13.1143662380354	3.16492772509273	0.0752357659199375	0.24403164226946	Activation
GCATTTGTTCAGGCTGAGCA	YLR433C	8.44991223196979	13.0864340592743	3.173449083822	0.0748442359590449	0.24403164226946	Activation
AGTCTTTTGACTACAGCCGG	CUT217	7.36057364638866	9.08221093792041	3.16905373038338	0.0750459147400872	0.24403164226946	Activation
GTAGTTGGCAGCTTTCTGCT	YDL087C	-6.80594397680845	7.88480129399975	3.17583177513432	0.0747351506628996	0.24403164226946	Activation
GATGCTAGAGATAATATTGC	YDL233W	-6.12653444831407	7.38095200001649	3.17665003331362	0.074697728252199	0.24403164226946	Activation
GGATTCAAAGTCTACAATTG	YER032W	-6.09443485000259	7.34686680802353	3.1804958985141	0.0745221099354526	0.24403164226946	Activation
AATAAAATAAGAATAGGCCA	YNL020C	-5.63025620539468	7.3424155137185	3.17083585086378	0.0749640726823335	0.24403164226946	Activation
GGCAACCTAGTCCACTCCGG	YKR012C	-5.17238275129255	6.36914664607769	3.16572024752731	0.0751992593372327	0.24403164226946	Activation
GATAAAATGACGATATATAG	YLL009C	-3.55005667240656	3.82246715920715	3.16340754284628	0.0753058445702252	0.24403164226946	Activation
GTCAATTTCACTCAGACTTC	SUT042	8.44176376433131	12.9861814140943	3.15746604488513	0.0755804142912041	0.244590868380982	Activation
GAAGAAACTATTTAAAAAGA	YJR143C	8.75634094467563	12.9784506908819	3.15495372657263	0.0756968375036692	0.244637488320483	Activation
GCATTAGGTAAATGGGTCCG	YHR191C	-5.29153318025705	6.70169201255043	3.14895376016342	0.075975662190788	0.245208126424643	Activation
ACAAAGATTTGTTTTACATC	YKR058W	9.29578554968119	11.564053907512	3.14453878191472	0.0761815357966365	0.245297503173759	Activation
GTCGGTGTCCACCAAATGAG	SUT255	-5.26661948410013	6.67605594076732	3.14397347181015	0.0762079398934322	0.245297503173759	Activation
ATAAAAATTACTACTTACAC	YLR083C	9.07641279378668	14.7997823472157	3.13841436195882	0.0764681155306917	0.245511827109286	Activation
GAGGCATAGTGAGAAATTGT	YOR062C	8.78415030754595	14.1482621322808	3.1324689107685	0.0767474299353841	0.245511827109286	Activation
GCCAAAAGTATAATCCCGGG	SUT814	8.71988803380084	13.5372576242341	3.13740177981433	0.0765156088093428	0.245511827109286	Activation
GGGAGATAATACATTTGAAG	YLR211C	-6.54483762837844	7.6112415509289	3.13240377733708	0.0767504959412952	0.245511827109286	Activation
GAAAGCTAATAAATATCATG	SUT475	-6.17906692000992	7.44041704129152	3.13164051297482	0.0767864346672078	0.245511827109286	Activation
GAGATCTTCTTTAATGTATT	YPL176C	-5.1108112277061	6.51618901017673	3.12790911370981	0.0769623903909863	0.245746753871618	Activation
GTGGCAATTTGCAAGTATGG	YHR039C-A	-6.54522715891564	7.61375882428337	3.11630321924602	0.0775124494183987	0.247174007586862	Activation
GAGTGCATTAGTCATAAGAG	CUT474	9.34846583271294	14.1002547379634	3.10889048451515	0.0778659871365407	0.247400420665157	Activation
GGGAAATACCCGAGAGTGAG	CUT818	8.34443868793204	13.3045973621952	3.10617087055133	0.0779961292839276	0.247400420665157	Activation
GTCACCACCATGTTTTCGGC	YLR005W	-5.43792564649653	6.66090204999219	3.10629801156724	0.0779900399696483	0.247400420665157	Activation
GCCGTGTGGACTGCATATGC	YGR154C	-5.02381513013127	6.21597472718368	3.11220724810968	0.0777075857194689	0.247400420665157	Activation
ATATCAAGCGATTCAGAGCT	SUT192	9.15137447589425	13.5839013466932	3.0858539925785	0.0789757969867134	0.247419856510268	Activation
GTTAGATGCTAACCCACGGC	CUT188	8.87641546068222	12.5260315308897	3.08872678610992	0.0788364719318398	0.247419856510268	Activation
GATGTTCATGTTTATTAGGC	YBR115C	8.82551253115424	14.8822930564564	3.09555308029896	0.0785064701725677	0.247419856510268	Activation
AGAAATTCTAGGCAGAGCCA	YOR096W	7.48324526669268	13.2239825519108	3.07965724428684	0.0792772314032449	0.247419856510268	Activation
GGTGCATTCTTTAAGAGATC	CUT262	7.47694070780649	13.4514314326562	3.08975482320422	0.0787866784080024	0.247419856510268	Activation
GCAGCGGTGATATATTTTGG	YEL044W	7.45942243117185	12.3103815817174	3.07773298073547	0.0793710872132019	0.247419856510268	Activation
GTCAGTTGCTCAAGAAGCTG	YGL220W	7.2813215452236	12.4612269965381	3.07750246335896	0.0793823387073972	0.247419856510268	Activation
AATCTCGAATCTCGGAAGGG	YOR003W	-6.39634815908197	7.45938592173066	3.07618364549934	0.0794467429161412	0.247419856510268	Activation
AGATGCTCTTTTATATAGTC	SUT001	-6.33056316302576	7.3884099714325	3.0786271504019	0.0793274592752542	0.247419856510268	Activation
GGCTCTTATACAGCAAAACT	YFR035C	-5.00759084578015	6.20308622331423	3.07867032511048	0.07932535336756	0.247419856510268	Activation
GGACTATACGGAGCATTTGC	YGR275W	-4.98123250272633	6.17340783578567	3.08672241839931	0.0789336520319382	0.247419856510268	Activation
GGTTCTGTACTTCCAGTAAG	YJR104C	-4.96771820272511	6.15695571067072	3.09951608603674	0.0783155702572837	0.247419856510268	Activation
ATTAAATGAGTTAATTGTAC	SUT404	-4.89390916886365	6.07950885066083	3.08017408634687	0.0792520428446684	0.247419856510268	Activation
TGCCTTTTCGCAGCATGCAG	YPR101W	-3.58956994662123	3.91533657573446	3.07827859424934	0.0793444628023449	0.247419856510268	Activation
GTCGCTGGTGGTGTCGCTGG	CUT484	-6.51907117342568	7.59164485218574	3.07147679883701	0.0796770602493508	0.247815292448694	Activation
GCTATCTATCGAACGTAAGC	YNL254C	9.89275957096173	13.8553761605912	3.05757447870837	0.0803615456003758	0.248333745296007	Activation
GAGAAACTTCGAGAACGCCT	YLR002C	9.57104656422269	13.1250643815514	3.0580857277775	0.0803362621376906	0.248333745296007	Activation
ATTGTCTTTAATTGAAACTT	YPR179C	9.26399889510454	13.8805496123056	3.06063727101007	0.0802102054915587	0.248333745296007	Activation
GGAACTTTAAAAGGAATGTG	YLL049W	7.56731262723902	10.6563037659692	3.06201788656841	0.0801420863593563	0.248333745296007	Activation
GCCCGGATCTCAAAGGAGAG	YOL105C	-6.07764093745038	7.11725514056046	3.05981974842356	0.0802505712136632	0.248333745296007	Activation
TCGATTTGATGGTGAAGAGG	YCL011C	8.84632989210829	13.8688403364586	3.04315976931994	0.0810779577717835	0.249303444847903	Activation
GCATGGGATGAACCACCAAC	YKR045C	7.90885355962438	11.832720498837	3.04060479258004	0.0812056573694385	0.249303444847903	Activation
GTAGCTAGATGTTGAATCGG	YML069W	-6.21436541451282	7.2683820005606	3.04036292474162	0.081217757335648	0.249303444847903	Activation
AATTTAAACAAACTTAGATG	YIL087C	-5.99728958657979	7.03176814072125	3.04652637699174	0.0809100228770658	0.249303444847903	Activation
CCTGAAAGGCTTTTTTGGAG	YNL182C	-5.8099094411627	6.82724735821099	3.04154491535016	0.0811586441409335	0.249303444847903	Activation
GGTGTCACCTAAGCATTTGG	CUT634	-4.81166028504781	5.99602439396059	3.03873753007308	0.0812991217143702	0.249303444847903	Activation
AGCAGTCAGCTCTCAGATAA	YCR037C	8.36503760854355	10.709729509344	3.01425907626678	0.082535164385538	0.25084831964071	Activation
GAAACAACAATAATGCATAG	YPL017C	7.82030438992768	12.9411768848637	3.022664512839	0.0821084596275261	0.25084831964071	Activation
GAAATATCTTTAGCGCGTTG	YDR420W	-6.44615497335066	7.51954812386857	3.02659693781866	0.0819096468674984	0.25084831964071	Activation
GTGGCAGCGAAGATTAACGG	YDL198C	-6.14712649270092	7.19942314132503	3.01429382122556	0.0825333956271504	0.25084831964071	Activation
GCAAATAAAAAGAAAGAAGT	SUT232	-6.0841160618127	7.13065442015922	3.01740891835893	0.0823749818405253	0.25084831964071	Activation
GATGATAAATCTCGCTATTT	SUT745	-4.86540818608093	6.05708745527225	3.02177503408789	0.0821535014488911	0.25084831964071	Activation
GAAGATGTGGGCAATGGTGC	YCL036W	-4.70763351706043	5.88596136531747	3.01473944506404	0.0825107139235508	0.25084831964071	Activation
GAATGCCAGCACAAGAAAAG	YBR260C	7.57016605878377	12.374098186381	3.00317899506645	0.0831013101510025	0.251616609818798	Activation
GGGCCGTGACCCGCTCTCAG	YMR275C	-4.85165310421872	6.04482564621593	3.00362253393718	0.0830785667755395	0.251616609818798	Activation
TGCTCAGGCACGAGAATAGG	YLR174W	-4.81301194801032	6.00272883272114	3.0031512410723	0.083102733518135	0.251616609818798	Activation
GCGCAGCTAATCGAAGAAGT	YNR039C	-5.66141904620982	6.67084166301576	2.99757418679455	0.0833892884275055	0.252165843189355	Activation
GCATGAGTTACGTCAATCTC	SUT433	-6.1423793235261	7.19725226967077	2.99402299705486	0.0835723083438134	0.252255812908615	Activation
ACGCTGCAACCGAGGATTGG	YLR323C	-5.63861795927037	6.64631275314354	2.99291638377538	0.0836294292169929	0.252255812908615	Activation
GAAATTCTAGAAAAACAAAA	CUT652	8.39554945948064	12.1486265879266	2.98917953260962	0.0838226289372543	0.25252093491399	Activation
CCTCTGAAGAGTTTGTACTG	YBL037W	9.04903412079664	12.0688152902043	2.97089018777202	0.0847751930906027	0.253437510721325	Activation
GGTTATGCGTCCCCTCCGGG	YLR448W	8.49895683520417	13.7856040625985	2.96405471432616	0.0851342037049534	0.253437510721325	Activation
AATAAGAGCTTGTACAAGCA	YNL156C	-5.94574612288756	6.98663628747734	2.97569647128488	0.0845237392112683	0.253437510721325	Activation
GAATTCGTTTGATTGGAAGG	CUT500	-5.78784511109962	6.8156212804211	2.96556619873168	0.0850546766536512	0.253437510721325	Activation
GCCACTGGGACAGAATCTCT	YFR020W	-5.71182547054614	6.7307774993962	2.97279357231963	0.0846755157313034	0.253437510721325	Activation
GAAGAAAAATAATAAAGGCT	YDR159W	-5.6576535158479	6.67169040634123	2.96881484458119	0.084884020253729	0.253437510721325	Activation
ATGTCCGTTATTAAAAATTG	CUT747	-5.58367289762403	6.59039314838826	2.96601672643575	0.0850309875934845	0.253437510721325	Activation
GCTACGCTAGACAACGACCG	CUT642	-4.77480624253631	5.96503980376967	2.97725404363075	0.0844424236268881	0.253437510721325	Activation
CAGGGAACCTGCAAGAATGG	YDR519W	-4.76069649551446	6.607927105243	2.96311380436199	0.0851837504759751	0.253437510721325	Activation
GAAGAAAGAATTACAAATTG	YDL065C	-4.75238815058259	5.94280592423785	2.96356884295522	0.085159784999458	0.253437510721325	Activation
AGATGCCTGGAAATTTGCGG	SUT742	-4.48133455424874	5.87807240795257	2.95698893547004	0.08550703922664	0.254084114083622	Activation
TGCATTGTGTGCATTTTCTT	CUT753	-5.91613272657271	6.9582346313209	2.95120480506078	0.085813561541398	0.254425619874173	Activation
AATTAATATAACCAACGCAT	YIL038C	-5.5898676365717	6.59980892169636	2.95081682550346	0.085834164503005	0.254425619874173	Activation
GGTCTACCTAATTACTCTCT	CUT626	8.61533804672968	13.2676926154569	2.93527907664312	0.086663684699672	0.255643139395027	Activation
GCTTCGCCTTTAAAAATGAA	YOR165W	6.88786506693364	12.175057603865	2.93678322729943	0.0865830039303893	0.255643139395027	Activation
GGAGAAACTACGCACCTACG	CUT533	-5.63673571481973	6.65440474030899	2.93753978703907	0.0865424537429382	0.255643139395027	Activation
AAAGAAATCTGACTTCGTCC	YOL113W	-5.54119048078468	6.54869236804407	2.93513644351985	0.0866713395863874	0.255643139395027	Activation
GTTCCGGAGACCAAGAGGAG	SUT113	8.60143948265727	12.9233180458702	2.9279450226831	0.0870582418732758	0.256468874707758	Activation
AGTATATCACGTCAAAAAAC	YOR016C	8.69554784533902	11.1047681847925	2.90823635739548	0.0881281983839089	0.257721243566602	Activation
ATTTCAAGATAGGAGAAGAA	SUT555	8.65280374894435	10.7200890232479	2.91197193268154	0.0879243100690289	0.257721243566602	Activation
GGGGAGTACCATTGGTGAAG	YJL099W	7.94430884249016	12.5204359869955	2.90827222071596	0.0881262385242233	0.257721243566602	Activation
CCATTTGTAATGATTTTGAC	YLL057C	-5.55986356497526	6.57440738462309	2.90913519862412	0.0880790927227472	0.257721243566602	Activation
GGTTCTGGTATGTGTAAAGC	SUT101	-5.47724672854413	6.48104861052939	2.91635298254011	0.0876858425563944	0.257721243566602	Activation
CGGATAATGTAGGATTCATG	CUT323	-4.71979129036911	5.91458566261269	2.91516384545882	0.0877504998224767	0.257721243566602	Activation
AAAAAAGTTAACTAAGCGAT	YLR172C	8.07989684340305	11.0774670422916	2.90156043618968	0.0884938483475317	0.258160886055208	Activation
CATCAAATAAGAGACAATGA	YOL023W	7.54298880613015	9.6774248333998	2.90217375953929	0.0884601872420261	0.258160886055208	Activation
CGATGAGAGCTTAGACGTAG	SUT083	8.82283272917155	14.08512643073	2.89147772648305	0.089049213911612	0.258523020532743	Activation
CAGCGAGGCTCATTCTGGGG	YKR021W	-5.69138243188252	6.72272041742044	2.89150923974625	0.0890474722551255	0.258523020532743	Activation
GAGTGTCCAAGGTTTTCGCG	YKR072C	-5.51121677114368	6.5230977028865	2.89317603422893	0.0889554054542864	0.258523020532743	Activation
GAAAAAGTACGCTACAACGG	YDR539W	-5.46149044339075	6.46761039705572	2.89424749884031	0.0888962766976461	0.258523020532743	Activation
CGTGAAAATACGTCAATGTG	YNL277W	8.60361511231696	11.1749174289482	2.86190012589192	0.0907002996863232	0.258882666423415	Activation
GCTCTTGTTTAGTAGGCGTG	YPL067C	8.18336605928865	13.9248839042818	2.88514338869433	0.0894000474026049	0.258882666423415	Activation
GAGGTAGCATGTGAAAACGC	CUT880	8.08998445380667	12.2726727647152	2.84271852358019	0.0917888010632817	0.258882666423415	Activation
AAAATTAGGCATTAAACATT	YGR085C	8.06258179523415	12.707738350865	2.84806994406862	0.0914837035410449	0.258882666423415	Activation
AGCATGAAGCTCTTATGATT	YLRCtau1	7.96443181524411	14.4238867176861	2.84721019897518	0.0915326453532394	0.258882666423415	Activation
GATTATTGATCACTTGTACT	YOL061W	7.28382022448515	11.6507723999447	2.84834552444061	0.0914680218798463	0.258882666423415	Activation
GGAAACACATGCAGAGAATG	YPL015C	7.26636165582876	12.5610326494481	2.86052266767251	0.0907779976048808	0.258882666423415	Activation
GCAATGTTTACCTTTTTCGG	CUT751	7.19115634312741	13.8832145138132	2.85302464087708	0.0912022058903586	0.258882666423415	Activation
GTCGAGCACCTGTCCTGGTG	YDR418W	7.01895973539843	12.9901123049806	2.8730510787329	0.0900739614518273	0.258882666423415	Activation
CGTCACGTCACGTAAGTGCA	YJL196C	6.90454063492287	12.6954355575647	2.83516420275731	0.0922213741856221	0.258882666423415	Activation
ACTATCGTACCTAATGACTG	YBR011C	-6.24320316122362	7.32571809780273	2.85547571795965	0.0910632974863693	0.258882666423415	Activation
GACGTACCGTTGCGACAGAT	YDR533C	-6.18129446220853	7.25670518358291	2.8739121433806	0.0900257918543902	0.258882666423415	Activation
GCAAGCTTTCGAAAGTGGCG	YJL165C	-5.96623160886166	7.02987139086864	2.84116217974478	0.0918777393282419	0.258882666423415	Activation
CGATTTGGAATGATGTAACA	YCL058W-A	-5.90543334857219	8.22649735540065	2.87975210419645	0.089699829911079	0.258882666423415	Activation
CGACGGCGCATTTGAATGGG	SUT819	-5.72147862754683	6.75826506216833	2.8740807134572	0.0900163649946955	0.258882666423415	Activation
GCACGGAAAGAAGCGGGAAG	YLR323C	-5.71349738846906	6.74984184369254	2.87217289951609	0.0901231172752704	0.258882666423415	Activation
GAAAGGATAATGTAACAAAC	CUT827	-5.63949213547848	6.67343206419458	2.84449363184705	0.0916874755036851	0.258882666423415	Activation
GAAGCTTCCAGTGAATCTGC	YNL052W	-5.57545159687897	6.60030011821599	2.85935743578016	0.0908437809395493	0.258882666423415	Activation
GCTAAAAAATGTTATACATT	YGL016W	-5.51328637051752	7.18531889174463	2.83376831335583	0.0923015473307088	0.258882666423415	Activation
GGTAAGTCCGATGCTTGTGG	YGL090W	-5.50311148918065	6.52009298244975	2.86067373277345	0.0907694729898776	0.258882666423415	Activation
AGCTCTTTGCATTCCGAGAC	SUT791	-5.48837641353297	6.50529315364251	2.85407056500302	0.0911429027479106	0.258882666423415	Activation
AGTTTTCGGATATTTAAATC	YOL095C	-5.34276136802611	6.34506976920964	2.8430238951761	0.0917713613848276	0.258882666423415	Activation
GGTCCCTAAGGATATCTCGG	SUT225	-5.29340033951528	6.29144205074063	2.83396357219801	0.0922903280515499	0.258882666423415	Activation
GCTTTATTAGGCGAAGCGGT	YBL003C	-5.2773749093547	6.26864660493505	2.85696592859208	0.0909789559743595	0.258882666423415	Activation
GTATTCAGTATTATTTCAAC	YFL010C	-5.20874539427485	6.19612533965993	2.83258866426657	0.0923693597214548	0.258882666423415	Activation
CACATGGTGTTGATGCTTGG	YHR162W	-5.13191050217377	6.1080494033481	2.83636963275424	0.0921522009889391	0.258882666423415	Activation
CCGTTTGAAACGCGCTGGGA	YIL123W	-4.86348471677548	6.08219228217384	2.8360961330314	0.0921678907333167	0.258882666423415	Activation
AACACCAACAACAAACCGGC	YJL183W	-4.48268304574866	5.66880008380287	2.83185038262668	0.0924118275473073	0.258882666423415	Activation
AATATTTACGGTACAGGACC	CUT915	-4.31265547905184	5.71411370253197	2.84828272854702	0.0914715949686894	0.258882666423415	Activation
GACGTATAGTTATCTGATTG	CUT133	-4.20903321397588	5.36369175239068	2.83709034156033	0.0921108702843118	0.258882666423415	Activation
GCAAAACCACTAAATATCAG	YNR053C	-5.21059939820848	6.20058945943726	2.82110236373019	0.09303248982374	0.260099321498358	Activation
TATATAAACAAATAGCATAG	YBR037C	-4.81587807864577	6.03283166560345	2.82057499529535	0.0930630599856511	0.260099321498358	Activation
GTGTAGCTGTTTCTATTTAC	CUT903	8.94872187687792	12.9574084132382	2.81506398839049	0.0933831727525012	0.260387032861044	Activation
GCAGTTTCACAGATCCTAGG	YLR233C	8.04080101146788	12.0008267600782	2.81603530031216	0.0933266662584571	0.260387032861044	Activation
GAGAGGCAATGGTGTTTCTG	YPL247C	-4.18290660008411	5.33899977858194	2.81258653328444	0.0935274683109235	0.260486491300342	Activation
GAAATATTATGAAAAAGTAT	YNL187W	8.25419836718975	13.0922734543741	2.80134540882782	0.0941852435614688	0.260803942333028	Activation
GTGGTAGAGATTGATTAACT	YBR126C	7.12297287442265	11.3788143062649	2.80158151918568	0.094171375921356	0.260803942333028	Activation
AGTTTGATAGATCACTTTGT	CUT914	-4.52910721209566	5.72425811643479	2.80502648685014	0.093969292586689	0.260803942333028	Activation
GGTCATAGAATTAGCATGTG	SUT357	-4.44624537108324	5.63370928527548	2.80261390151741	0.0941107663496623	0.260803942333028	Activation
GAGATTGTACAGTCAGTGTC	CUT059	-4.38243639375718	5.56293121157982	2.80467854966444	0.0939896813043739	0.260803942333028	Activation
GCCGCTCCAAGAGCTTGGGG	YNL275W	-4.24711359164641	5.41430964961719	2.79487547025045	0.0945661130941741	0.261556561937519	Activation
GAGACTTGGCTCCTTTAAGG	CUT734	-5.65960967146599	7.98175595574888	2.78838675901893	0.0949497716642123	0.261896274031973	Activation
GCGATAATAGCTTATTAAGG	YML092C	-5.48795037608756	6.51647161815376	2.78924875296242	0.09489870704019	0.261896274031973	Activation
AATTTTACTAAGAAAAGGAG	YMR267W	-4.29943702463221	5.47405259044432	2.78725976878412	0.0950165798197733	0.261896274031973	Activation
AATTGTTGATTCTTTCTCTT	SUT711	-5.41507230804559	6.43660696347416	2.78522478453413	0.0951373436546646	0.261928071278858	Activation
GGGTGACCCCTATCAGCCTG	YBR126C	6.78757799791599	12.4353327432391	2.78225976674225	0.0953135984680762	0.26211239578721	Activation
CCCATTCAAACGAAGATGCT	YPR178W	7.19357718779441	10.6115722710048	2.77501570307229	0.0957457174485247	0.262862725503876	Activation
GAGAACTCCAAAATTCAATT	SUT093	7.06483835502297	12.0066750767388	2.77401329148827	0.0958056806048322	0.262862725503876	Activation
CATAAAAATATGCTTCCAAT	SUT464	9.04698059717944	13.3599538486579	2.76942071204186	0.0960809271031933	0.263228137701833	Activation
GCCTCAGCCAGAATTTTCAG	YGR123C	7.85136390716234	14.7325286629448	2.76702636077861	0.0962247689673761	0.263228137701833	Activation
CATCATCATATCTGTTTTCG	CUT453	7.66357996055526	10.4738137216699	2.76630464965255	0.096268172128652	0.263228137701833	Activation
GATGATGAAATAGTACTGCC	YDL063C	-5.06729251059099	6.05104287585733	2.76061397334685	0.0966111532032051	0.263865085855679	Activation
GGATTCAACGATGACTTGAC	SUT002	7.70672701557582	11.8048463658237	2.75313933902563	0.0970636793991779	0.264799434811409	Activation
GTGAGTAAGCAAAATGTGAG	YDR520C	8.27835591267802	14.3518762741217	2.74753507841698	0.0974044856733503	0.26542722345988	Activation
AATCTTCGTTATGAAAACAT	YKL160W	8.4823450415426	11.9498877146378	2.74198770779513	0.0977431175850185	0.265881780506165	Activation
GAACTTGGAGACCTGAAACG	YGR146C	7.4995921694909	12.0171356745912	2.73936074129958	0.0979039250154061	0.265881780506165	Activation
GTTTCTACGCTATCAAGGAC	YKL095W	-4.03138194582117	5.1821287451067	2.7396494510286	0.0978862378003569	0.265881780506165	Activation
AGCTCTGATACAATGAACGG	YCL002C	7.12533871760002	12.5269853911421	2.73229791628924	0.0983377021965312	0.266597496293584	Activation
GAAACTCTAAAATTAAGATA	YPL257W	-3.45000923174859	4.50124228031347	2.73145164207302	0.0983898182734869	0.266597496293584	Activation
GCGCGGCATGTCGTTTTGTG	YCR063W	-5.34576669426803	6.37054735066439	2.7285140690995	0.0985709567072827	0.266786855738221	Activation
ATTCATCTTGCATTTCTATT	YPL122C	8.76287263599196	13.0916267040584	2.71818163305221	0.0992109785475741	0.267119666862155	Activation
TGGCCCGTGTGGGTTAAGGG	YIL136W	8.36576042087939	13.6567232618062	2.71136717613153	0.0996355679222992	0.267119666862155	Activation
GATTATATTCTTGATGGTAC	YBR081C	8.26336921832974	13.6042830012041	2.7121605903237	0.0995860306538788	0.267119666862155	Activation
GCAAAAAATAAGAAGAAAGC	YJL183W	8.17928744020936	13.1298520410952	2.70505496759221	0.100030634212767	0.267119666862155	Activation
GGATCAAGTTCCCTCCCGAC	YLR422W	7.77811773345935	15.1538626906968	2.70650313690536	0.099939845720083	0.267119666862155	Activation
GCGTATTCATGCTCAAATTG	YBR005W	7.54616101410201	11.3460077724291	2.71614982005545	0.0993373679717331	0.267119666862155	Activation
TATTTAGATTAGTTAATTGG	YDR420W	7.53585365538078	11.8099089073161	2.71827790142987	0.0992049945068194	0.267119666862155	Activation
AAAAGTATATTATCAAATAT	CUT167	7.35423358669967	12.795283200367	2.70532142609896	0.100013922661672	0.267119666862155	Activation
ATCCCCACAGGATTAATCCT	YOR332W	6.60768133303595	12.5813515598064	2.71296288066979	0.0995359665408698	0.267119666862155	Activation
AAATTGGTAACATCCTTCAG	YOL110W	-5.47671177351669	6.51821607598269	2.71223358188756	0.0995814747348415	0.267119666862155	Activation
AACTGTTTCCTTCTATTTTC	SUT358	-5.32337847000825	6.34723596390049	2.72048557351588	0.0990678737032283	0.267119666862155	Activation
GAATCCGCTGATCTTATTGG	YGL188C	-5.00566716327238	5.9920084821499	2.71030343748792	0.0997020252752793	0.267119666862155	Activation
GTTCAGATGGCTCCTTCCGG	YKR053C	8.8084635278012	13.2390545971834	2.69916193394493	0.100401009961	0.26781048040765	Activation
GAGTAAAAAGAATAAAGGGC	YGL080W	7.47907074035466	12.6454406090009	2.6953834289466	0.100639276171818	0.26785014901223	Activation
GAAATGGAATATCAACAAGC	YDR081C	-4.22389136090382	5.40680216226253	2.69715353952211	0.100527579132113	0.26785014901223	Activation
GAACAGGGCGAGCAATGGCG	SUT716	-4.94352425357635	5.92554773728688	2.69030534500165	0.100960465299307	0.268109851370695	Activation
ATTAAATATATATCGAAAGC	YOL063C	-3.20414472637722	4.21203320406288	2.69094404032252	0.100920006264865	0.268109851370695	Activation
GAAATTCTTTTGTAGTTCGG	YPR026W	7.01985075400274	13.3134853553098	2.68593899109283	0.101237533301149	0.268110725455914	Activation
GAGAAAAAGTAAAAGCATAT	YOR323C	-5.13608833105208	6.14516451929965	2.68501593537538	0.101296212369916	0.268110725455914	Activation
ACATCCGTACCCTACACTCC	YDR264C	-4.47302796823494	6.33124751080971	2.68711414707208	0.101162881860769	0.268110725455914	Activation
GAATGTTCTGAAGTACGGTT	CUT130	7.66640837569816	11.2682045855728	2.68324385932762	0.101408968272488	0.268113236954162	Activation
CACAAGTTCACAAGGGCGTG	YML041C	7.57484051805014	10.1119107976455	2.67811231029085	0.101736259695965	0.268280811583322	Activation
GGAAGGTCAACGTATAATGG	SUT370	-4.95093041701353	5.93726266780405	2.67699021400468	0.101807981042879	0.268280811583322	Activation
CAACAAAGTTGCTAGATCCG	YKL007W	-4.46604049512667	6.06318079499073	2.67993604147606	0.101619809587271	0.268280811583322	Activation
GCACCAGAGGAGGAAGTAGG	YIL124W	6.8040814112043	12.6728262038916	2.6752323539811	0.101920449857898	0.268282369658879	Activation
AAAAGAATCAGCTATAAAGC	YGL210W	7.7547866458982	11.9554505418958	2.66535709894996	0.102554805215037	0.268651268002732	Activation
GCAAACAGTACGCCTTAGCG	YJL190C	7.19636651177248	12.7581341073271	2.6647977765514	0.102590863340992	0.268651268002732	Activation
GTCATTAAGACAACAAGTGC	YML116W	7.08575499654233	12.9966850262124	2.66799451910537	0.102384964014933	0.268651268002732	Activation
GTTATCTTCTATTAAATTGT	YGR013W	-5.15351506946757	6.16961042539216	2.66433432767475	0.102620751247082	0.268651268002732	Activation
GCAATACCAATGCCAAAGCA	YBL022C	-3.63112569258285	4.73352828151084	2.67020888530966	0.102242603704292	0.268651268002732	Activation
GATCCGGGATGGCTTATCTG	YBL040C	7.22928145215603	12.1845768108126	2.65841902944595	0.103003067955937	0.268845945688639	Activation
GCATTCACGACTATGTCGCG	YHR032C-A	6.5119410522232	12.5984314739966	2.65331586201432	0.103334147732907	0.268845945688639	Activation
CATTATCATCATTCTTGTCT	YBR223C	-5.05495230455835	6.06116293569436	2.65279830212665	0.103367790627575	0.268845945688639	Activation
AGAATAATAACAACGTGCCC	SUT261	-4.96067024737559	5.95401962669381	2.65294127728053	0.103358495629243	0.268845945688639	Activation
GTTAGTCGGAACACTATGTG	CUT250	-4.44668197424916	5.65829662800525	2.66078237946844	0.102850133622889	0.268845945688639	Activation
CCAAAAGCCATACAGCGACG	YKL029C	-3.57394721112674	4.10460880305891	2.65342039269135	0.10332735439047	0.268845945688639	Activation
TCTCTCATTATATTACTTTG	YFL038C	8.30737460215662	12.2270286466499	2.64896464778321	0.103617362944064	0.2692030729576	Activation
GGATGAAATTCCCGTTGATG	YPR007C	7.0384280338225	12.8664241745249	2.63907101093395	0.104264496071795	0.270591192186325	Activation
GTTACTTCACCCTTAAAGTT	YOR213C	7.97042248983774	12.9282892521095	2.62985443882786	0.104871327397792	0.271301966493819	Activation
CGGCGTTATATGTGGATGCA	CUT660	6.82184742304229	10.3613567847459	2.63031866820578	0.104840669552418	0.271301966493819	Activation
AATTATGGTAAATCATGCGG	SUT264	-4.94982971457502	5.9470652026455	2.62975670969068	0.104877782710496	0.271301966493819	Activation
AATTCTCTTTGCTTTCGCAG	CUT030	7.59229951280739	12.9362311614068	2.62069169344687	0.10547845289773	0.271324534347962	Activation
CACACCGTCATCAAATTGGG	SUT500	7.41917481668069	14.5600389322317	2.61429140737607	0.105904822414384	0.271324534347962	Activation
GGTCGTGTACGAAAATGATG	YAR019W-A	-5.84854654702628	8.83492845829239	2.61573283408261	0.10580863391915	0.271324534347962	Activation
GAAGAAATGGGTATGTGCCT	YML017W	-5.18286156486747	6.21081154185122	2.62114209495338	0.105448519335369	0.271324534347962	Activation
TTAATTGAAGATTTTGTAGA	CUT521	-4.97526320060994	5.97735116217781	2.62402988500944	0.105256818685539	0.271324534347962	Activation
GGAATTGAGTTTACAAAGGG	YNL152W	-4.92985881864699	5.92731792149452	2.61691205683906	0.105730013908698	0.271324534347962	Activation
GCTTCGAATGATTTAGATTG	CUT612	-4.86139306006728	5.84878206480479	2.61624352702514	0.1057745776225	0.271324534347962	Activation
GCTTGGGTGGAAAAGTGGAG	YNL225C	-4.84631315958976	5.83053211657376	2.61992625596022	0.105529345034167	0.271324534347962	Activation
TTGATTTTAATATATATCTC	CUT806	-4.22662956762935	5.42489463508782	2.61678464732049	0.105738505347092	0.271324534347962	Activation
CATTTTTGCTGAGTCTTTTT	YMR319C	6.92571140175646	13.5935785877277	2.61101153694688	0.106124050434831	0.271596022350826	Activation
AGATTTATTTTGTCATTTTT	SUT737	8.21853633074935	12.0908930719435	2.60419606574095	0.106581192981632	0.271727594269103	Activation
CTCTCACGTGAAATCTGTGG	YGR286C	7.09681018889742	13.0165139563684	2.60088862606657	0.106803815101928	0.271727594269103	Activation
GCCATAGAAGCCGTGAGAAG	CUT653	6.84644430279123	13.4949918694997	2.59978895559209	0.106877946344764	0.271727594269103	Activation
ATGTTTATTCGCGTTTGCGC	YDR073W	6.66704417438745	10.5457821142057	2.59840730435228	0.106971166578974	0.271727594269103	Activation
GCGTAGAAGTTGGCCCAAGG	YJR123W	6.58769802242284	8.99041040160139	2.59989371223301	0.106870882033359	0.271727594269103	Activation
GAATTTTATTTCTTGCATTT	YGR146C	-4.75602666082028	5.73240086506952	2.59566993585313	0.107156120878311	0.271727594269103	Activation
GACTGGAGCAGCTAATGCGG	YPL187W	-4.45393335203426	5.67641063254215	2.60217055522704	0.106717468599414	0.271727594269103	Activation
ATGACACACCAGCTATGGTC	YPR005C	-3.82074830683712	4.52515343115625	2.59509089629787	0.107195289482307	0.271727594269103	Activation
GTGGTTTTAAGGGCCTGTGG	YLR381W	-3.78336052442878	4.46773824489805	2.59663491672933	0.107090880517882	0.271727594269103	Activation
GCCGTTCAAGCCAGAAGCAC	YLR091W	7.40212928047791	14.074989605576	2.59239847601004	0.107377622314692	0.271902363580392	Activation
GGTTCATGGGAGACACCCAG	YGR117C	7.15381046651009	12.7939348979556	2.58509929688743	0.107873643221083	0.272044274870936	Activation
ATTTTGTACATTTTAAATAG	CUT326	6.95098737896397	12.5993755287467	2.5846388060931	0.107905020448429	0.272044274870936	Activation
GTTGTGTACTCAATAAATAG	YLR436C	-5.03701206195022	6.05548646676511	2.58422013165546	0.107933557062535	0.272044274870936	Activation
GTGTTATTATTTCTTATACG	YBR156C	-4.73841352254487	5.71519227348964	2.5832326446801	0.108000896445843	0.272044274870936	Activation
TTTCTTTAAAGAAAATAATG	YER005W	-3.75134950666008	4.42232813456896	2.58952032662312	0.107572909385507	0.272044274870936	Activation
ATCAGAAATCTATTTTTATT	YPR116W	7.0162004713411	12.2601331617087	2.5736619338044	0.108655944772715	0.273407088735542	Activation
AAAATTAAGTGTTAAGGAGA	YKR092C	-4.73182079803925	5.71063429542006	2.57058446295462	0.108867502440268	0.273652275525956	Activation
ATTAAAATCTGTATTAGAAT	YNL082W	7.2490745335639	11.8792618751091	2.56877498933094	0.108992104147841	0.27367860287594	Activation
GAAGAACAGCTCCTAACCCG	YER178W	6.81838669641216	12.6685423326892	2.56466181361925	0.109275923868454	0.273817832222103	Activation
AAATATAGCATGGTAGTGCG	YOR143C	6.34682062661823	9.30255492315659	2.56596094543142	0.109186192773276	0.273817832222103	Activation
AAAAAGAAAATTCAAAGAAA	YDR364C	5.65459351999181	8.97678201265152	2.56186023674656	0.109469704877215	0.274017069202048	Activation
GATTAGAAGACAATACAAAG	YHR080C	7.2320255002429	12.2577017025247	2.55384636316337	0.110026101647965	0.275122619136412	Activation
GGAATTCTAAGCAATTGGGG	YLR039C	-5.75717152857172	8.01557033934428	2.54766562973359	0.110457348940932	0.275220779712669	Activation
GATTGGTGTCTTGTCGAGAG	YKL151C	-4.92885987758277	5.94230840301281	2.54749976024047	0.110468947709558	0.275220779712669	Activation
TTGCAAGCAAATAATTTGTT	SUT074	-4.72229982111909	5.70459783946129	2.55098857762937	0.11022526687538	0.275220779712669	Activation
CTTCCATCGTGATAATTCTG	YHR167W	-3.6668567760532	4.80563381783377	2.54670642916513	0.110524441561009	0.275220779712669	Activation
ATTTCTTTCAGTGTTATAGC	YOL008W	6.26293668538394	8.46812862170848	2.53856525558401	0.111095695641084	0.276069925541263	Activation
GCAATTCAAGTTGGTTAATG	YML127W	-4.67710969911655	5.65524647052838	2.53943973114688	0.111034179540071	0.276069925541263	Activation
GAGAACAATCTGCAACTGGT	YLR178C	-4.74291376776741	5.73417973321653	2.52970647319631	0.111720996955583	0.277336387887668	Activation
CGCCAAATCTAAGTCACGCG	SUT503	-3.90077953029004	4.67548032633854	2.52708165599269	0.111907014121723	0.277510878866486	Activation
GCATATGTATTATCTTAAAT	YPL227C	-4.85147745768923	5.85983012478292	2.52478299539486	0.112070197109532	0.277628442839522	Activation
GCTTAGTCGGGAATAAAGGC	CUT639	6.87147690797734	11.8586359778291	2.52090709605336	0.112345942702404	0.277730900048581	Activation
CGCCTCATTAGGGTCAACCG	YGR185C	6.33328888450097	11.7534446448398	2.52156288830928	0.112299234788744	0.277730900048581	Activation
GAAAAGAAAAGTTATGATTT	YOR355W	-4.65165589138112	5.63102560197517	2.51898574146195	0.112482911789363	0.277730900048581	Activation
TCGACAGGGGTTGAAAAGGG	SUT647	-3.80321831664516	4.53837954633537	2.51769783292474	0.112574826875405	0.277730900048581	Activation
GAAATCTGCTTCATAGAGTG	YML129C	-4.64297111369085	5.62224316510764	2.5135726057432	0.112869792245206	0.277886819100619	Activation
AATTGAAAGAGCTGATACAG	YIR025W	-4.4864102644567	5.43684123556051	2.5150712255237	0.112762538357765	0.277886819100619	Activation
GAAGCAATTGATAAAAGGAG	YEL034W	-4.81827458117877	5.82542445771454	2.50820237575583	0.113255055270084	0.278549356448884	Activation
TGAGCCACAGAAACCGGACA	CUT797	7.94990021233245	13.8139317705699	2.4897575128306	0.114589378425481	0.278775187647348	Activation
TGTGACTGACAACAGATATG	YPR129W	7.77718739616864	10.5430613509604	2.49012828405111	0.114562386295321	0.278775187647348	Activation
GAGAAACCGAAGACATTGAG	YGR031W	7.46917249025747	12.3787851255691	2.5052626414687	0.113466566868789	0.278775187647348	Activation
AGAGGGTACCGACTTGTCGG	YDR243C	7.44293283573491	13.2359288179158	2.48766404909221	0.11474191418179	0.278775187647348	Activation
GATGGGTTGTCAGTAGACGG	YGR034W	6.58235665553059	11.4620961633535	2.48868884442531	0.114667216697106	0.278775187647348	Activation
CCACGCCGGAGTGATTAAGG	YNR013C	-5.13115306709814	8.23899315321469	2.49475598012622	0.11422607950058	0.278775187647348	Activation
ATCGAAAGCATTACTTTTTT	YCL054W	-4.64772600811871	5.63233778668398	2.49606750649222	0.114130965548595	0.278775187647348	Activation
GCCATAAGTCATCTTCGAGC	YPR033C	-4.6264952686414	5.60878158990656	2.49193572994406	0.114430904682245	0.278775187647348	Activation
GTAAGCTACGTAGACTGATG	YBL025W	-4.36936174742505	5.30239753163196	2.49204955847797	0.114422629863244	0.278775187647348	Activation
CTAACTCGGTGTCATAAGAC	YPL235W	-4.10137772973664	4.96021663841259	2.50210973393837	0.113693900090888	0.278775187647348	Activation
ATATATAAGGTCATAAAACT	SUT713	-4.08303009969142	4.94084950998247	2.48999928811797	0.114571776398567	0.278775187647348	Activation
CAGTCTAGTACTTTAGGGAG	YKL011C	-3.75353462367219	4.4727331571507	2.50036333349718	0.113820036346783	0.278775187647348	Activation
ATTTTTATTTTTCAAGAATG	YDR125C	7.46047839020065	12.4466134269962	2.48407688375263	0.115003806303001	0.278846438336295	Activation
GTACTCCTGATCGACGCCGG	YEL043W	-4.59701398021536	5.5762643761284	2.48495561478375	0.114939590891839	0.278846438336295	Activation
AGTTCAACAAATACAAATAG	YGL130W	-3.65086534108749	4.32559897352897	2.48186450447888	0.115165656661363	0.278956812801968	Activation
GGCACTTGTCACTACCGACG	CUT585	-4.62299374171323	5.60812181334917	2.47959142060971	0.115332209782592	0.278969182935419	Activation
GTGTACACCAACGCATGGCA	YGR267C	-4.40552461660604	5.35195807812834	2.47387234565732	0.11575243412041	0.278969182935419	Activation
GAGCTATAATAGCAGAATGG	SUT407	-4.36823956098687	5.30684456071	2.47403496825354	0.115740461672247	0.278969182935419	Activation
GCCATCAACGAATTTAACGG	CUT551	-4.3460391062358	5.27888791212707	2.47667153786861	0.115546545219097	0.278969182935419	Activation
AAAAGAAGATCAGAATCGAT	YBR090C	-3.63886080343012	4.30814475011949	2.47825345986338	0.115430368939287	0.278969182935419	Activation
GCATACAGGGAAGATCTCAC	CUT303	-4.40154753689125	5.34864386030752	2.46899732856404	0.116111973626763	0.279554731683713	Activation
GCTACATGACTTGCCAATCG	SUT678	-4.18689363754535	5.96806355814005	2.46661360950367	0.116288225030339	0.279698258397947	Activation
GGGTAAAATACTGTACTGCG	YCR004C	7.64468019603922	13.3308251975824	2.45599616235213	0.117076872798613	0.280469871099973	Activation
GCGTTGCTTCTATAATTGGC	YKL164C	-4.58693328119164	5.57193985644887	2.45733424773258	0.116977157257184	0.280469871099973	Activation
ATAAATTATTTTGTATGGCT	CUT834	-3.94110817615344	4.76275983811006	2.45904350382618	0.116849918131388	0.280469871099973	Activation
GGTTTCTGGAAAAACTGACG	YIL162W	-3.83039203926172	4.60679483794644	2.45927483701682	0.116832709153937	0.280469871099973	Activation
GTGTTGTCCACATTAGGTGT	YJR002W	6.8158644724705	13.3571572785425	2.45228494931846	0.117353928140299	0.280580988226309	Activation
GACCTTATATAATTATTGCT	YDR248C	-5.13040346108392	7.46642527850906	2.45224025619467	0.11735726905379	0.280580988226309	Activation
ATTTTCCCGTCATCTTGGCA	YKL171W	7.57401828625132	12.8689343124374	2.45050291988606	0.117487220417847	0.28061190693426	Activation
GCTATTTAATTACAATTCTT	CUT559	-4.5373020721715	5.51727023306105	2.44599654894758	0.117825035226133	0.280969431327926	Activation
ATAGCTGCTATATGTTTAAT	YNR011C	-4.26541514539134	5.18985356576643	2.44538121850635	0.117871246003292	0.280969431327926	Activation
GGAAAATCTAGATCAGAGGG	YJR010W	-4.91582961169983	7.46966490202066	2.44362522771987	0.118003229580043	0.28100471155208	Activation
ATTATCAACTTCGATTGAAG	CUT520	6.7500738459301	12.9875709527612	2.43977246630372	0.11829338328527	0.281361466716355	Activation
GTATCACTAACGTAAAGCAT	tQ(UUG)E2	-4.46321304002278	5.4319041183559	2.43852226158701	0.118387706387324	0.281361466716355	Activation
ATCTCCCGGTCGCAAAACTG	YER091C	-4.73206329767955	7.06358020889017	2.43669026949836	0.118526073360639	0.281411409820606	Activation
ACATTCTAATGACTTGATTC	YOR120W	6.64171673554471	12.4426703810917	2.43249259771392	0.118843790667114	0.281886656794994	Activation
GTCGCAAAAGCTAAGCAAGG	SUT191	-4.71031417801199	5.72177214007445	2.42874099516073	0.119128542847659	0.282028701006803	Activation
GTTCTGCGTCACAGTATCGC	YHR034C	-4.27816790983868	5.21121371999602	2.42860477132249	0.11913889663048	0.282028701006803	Activation
GGTATATACATACGCTGACA	YBR119W	6.18107727158376	8.56492328124285	2.42253213148715	0.119601464768318	0.282287709167743	Activation
GTCAATGAATATCAAGTTTT	YLR353W	5.9850363019169	8.2920102161006	2.42340407504938	0.119534924620342	0.282287709167743	Activation
GCGATATGCCAATTTGAGGA	SUT653	-3.89177566185749	4.71107292560305	2.42258281820942	0.119597595618403	0.282287709167743	Activation
GCAATTAGAAAAGGAGCACG	YPR045C	7.00032325383349	14.7058257173618	2.41682723710619	0.120037832182487	0.282388343605809	Activation
GGTTTAAGTTGCATTATGCT	YKL055C	5.92002580692652	9.63039928451067	2.4136632629731	0.120280604204541	0.282388343605809	Activation
GTGCTAGGCGATAAATTAGG	SUT713	-4.68192341843749	7.23890113253403	2.41122034051523	0.120468421813487	0.282388343605809	Activation
GAAATGATCATAAATAACTG	YDL229W	-4.42399053601376	5.3904057076717	2.41997052925361	0.119797184155042	0.282388343605809	Activation
GTATTCCGTTAGTGACTGCG	YER074W	-4.38157191926037	5.34060787547252	2.41781932228863	0.119961821157049	0.282388343605809	Activation
GGCAGGACCTTAGTTTTGAT	YDR148C	-4.20616041068544	5.12732231411221	2.4130636810424	0.120326671426042	0.282388343605809	Activation
GTATGGTATCGGTGGTGGTC	YPR084W	-3.95304528255332	4.79940126333498	2.41239812722476	0.120377830296482	0.282388343605809	Activation
TGCTCGTATGTAGAAGAAGC	YGL068W	7.59662874937574	11.2638408182615	2.4033105687172	0.121078775596994	0.282713635717226	Activation
GTATAATACGAGTAACGGTA	YIL049W	7.36247692406165	12.5424919732384	2.40401942547827	0.121023937501273	0.282713635717226	Activation
AGCGAAGCTTACTAAATAAT	CUT615	6.2864331411368	13.3265491846199	2.4045378824099	0.120983846410037	0.282713635717226	Activation
AGACTAAAATAAAAAAGTTA	CUT528	-4.11246888513139	5.01156050942785	2.40582568709839	0.120884327057075	0.282713635717226	Activation
GGAAATACCACACAGACTGG	YGL031C	4.21662445230043	6.6394120926163	2.39361909883206	0.121831288616862	0.284193998154897	Activation
CTGTCAAGACAGAATTCAAG	YPL119C-A	7.14143243861541	12.3508189549454	2.38283788175655	0.122674514510206	0.284259750394051	Activation
AATATGTATTACCCGAAGGG	YDL132W	6.59794373563337	13.7642038362183	2.38957555924563	0.122146788460495	0.284259750394051	Activation
GAGCTTGGCACTCTTAAAGG	YJL002C	6.3406089074547	12.695331675122	2.38141026513745	0.122786656387865	0.284259750394051	Activation
CACTTCGTCGATCTGGAAGC	YML048W	6.14824942386899	13.1878450978257	2.37812846126576	0.123044879444964	0.284259750394051	Activation
GGGAACGAACCTCTCTCGGG	CUT248	-5.16317126263579	8.15938244057397	2.37995339088598	0.122901213745392	0.284259750394051	Activation
AGTACTCTAGTACACAGTAA	YMR098C	-4.73592477074834	7.35878388735161	2.37862021412804	0.123006148380386	0.284259750394051	Activation
GCATATGCCAGACTTTGTGT	YDL136W	-4.30204635361284	5.25606766103019	2.38146511604275	0.12278234564984	0.284259750394051	Activation
AATTTCTAGGGGTTACCCAC	YIL007C	-4.21845685787231	5.15424694713102	2.3796183225019	0.1229275777055	0.284259750394051	Activation
AATAGATTCTGATGAAGAGG	SUT230	-3.88290095945839	4.71735940165197	2.38145068069777	0.122783480108741	0.284259750394051	Activation
AAACAATAGTCGTTATTCTT	YNL117W	-3.84261191548086	4.6576970969837	2.38932345206769	0.1221664892659	0.284259750394051	Activation
AATTTGGATTTGGAAATAGC	SUT666	7.09665200861833	13.9681377045614	2.37269258135859	0.123473918727674	0.284428873303517	Activation
CTGTAAACAGTATCATGCTG	SUT100	6.93055465493549	12.6677378538748	2.37500044149494	0.123291563141874	0.284428873303517	Activation
GAGATGTATTCAGTATTCTG	YOL132W	6.66573064484609	8.77287197033484	2.37372481170149	0.123392320070422	0.284428873303517	Activation
AAAGACAACAACGAATGTGT	YGR177C	7.39961254846855	13.6234340651475	2.36545926570161	0.124047401342454	0.284928801167821	Activation
AGACCCCAGATACCGTCATG	YMR252C	-4.24501012017404	5.19111012294213	2.36662708228494	0.123954612952537	0.284928801167821	Activation
GAAGAAGCAGATGCTGAGCG	CUT655	-4.22719400299338	5.16962341369721	2.36552030363756	0.124042549688844	0.284928801167821	Activation
GTTTGGTGATATGGGCGACA	CUT924	7.00429460368849	11.1039411963384	2.35972812388711	0.124503886175517	0.285634865391832	Activation
GGGTAACTAAAATGGGTGGG	YMR207C	6.44029877234544	13.9106620873205	2.3576089976138	0.124673146481202	0.285634865391832	Activation
GAGGCAAAGAGTATGGTTGC	YMR061W	6.17767524482713	8.75263033254662	2.35712129445133	0.12471213680786	0.285634865391832	Activation
GTTCTTGTTGACGGCTTGAG	YHR202W	7.68697822173328	12.4283943587877	2.3549513921702	0.124885777900045	0.285759633019377	Activation
GTTGAACTCTAAGAAATATG	YJR055W	6.3386785356129	9.90047480905532	2.35210936919412	0.125113610152997	0.286008043038025	Activation
CATCTGGATGATATGTGCAG	YAL049C	6.90966924589063	13.8706329833622	2.34386403275814	0.125777219559457	0.286432832387063	Activation
GGACTGACGCCAGAAAATGT	YDR008C	6.81911207583651	12.0603532814943	2.34574987884102	0.12562509671391	0.286432832387063	Activation
AGGCAGGACTAAGAAGACTG	YOR383C	6.07959086530924	8.30362884864592	2.34392564356946	0.125772246454383	0.286432832387063	Activation
CAATCCCCTCCGATCGTCCG	SUT124	-4.12158190162245	5.04484497903399	2.34734214379921	0.125496814956344	0.286432832387063	Activation
GGTTAATAATATTCATATGG	CUT202	-5.45838110710654	7.7260977451762	2.34157792379934	0.125961904450752	0.286581258892698	Activation
CGGACTGCATGGATCAATGG	YCR028C	-4.59738692853032	5.61604868239999	2.3394195331148	0.126136548233005	0.286706580722982	Activation
AACTTTTTCCACCGAAGGGG	YMR298W	-4.49220975740938	6.82886304347162	2.33386146449694	0.126587513733357	0.287187188204909	Activation
GATTACTAAGATTTTCTACG	YDR472W	-4.42756941200973	5.42039666847251	2.33442722967985	0.126541527331841	0.287187188204909	Activation
GCGAAGAAAAAAGGATGCGT	YPL096C-A	-4.13407639285279	5.06746565159558	2.32822974032537	0.127046285075923	0.28795556863144	Activation
GGGCATTTGGAGTTGTTGAG	YLR364W	-4.28018245699097	6.77484600152487	2.32626179831433	0.127207033336627	0.288047654335439	Activation
GGCTTTATAATTGAATCTCT	SUT739	6.78107827609715	11.5773064111024	2.32212764756952	0.127545462541892	0.288226252340261	Activation
GGACTTTACGTGGCCAAGGA	CUT190	6.63644138628115	11.3086482582124	2.32089590705505	0.127646488734511	0.288226252340261	Activation
GTTTTCTTGTAAACGAAATG	YBR149W	-4.57086604219819	5.58958889125531	2.32217111118782	0.127541899322721	0.288226252340261	Activation
ACTCTTCCGTAACAAAAGCC	YMR273C	7.28041264278458	10.0330679465566	2.31900662903723	0.127801618640103	0.288305062557824	Activation
TGTACAGGATACGAATTAGT	YLR050C	7.3690447879437	11.0454643811997	2.31528982715783	0.128107420678773	0.288395834825726	Activation
ATAGGAGCGATCTATAGATC	CUT917	6.30772901298851	12.2524315906188	2.31579871925025	0.128065503197751	0.288395834825726	Activation
ATTATAAAGTTTGTTTTCAC	YDR200C	-4.24056767781017	5.20310485406919	2.3141343739015	0.128202652178575	0.288395834825726	Activation
ATGATTGCTGTAAAAGTATT	YKL214C	-4.05388094656269	4.9722666104153	2.3122720289742	0.12835631104993	0.288470884627679	Activation
GGGAAGAGCTCCCCAAGATG	SUT064	6.02115953420374	13.0562118102709	2.30878003356986	0.12864498266197	0.288848940471353	Activation
GAGAACGACTGAAAAGGCTG	YNL131W	5.77452344572601	12.162413738425	2.30258431980306	0.129158942980368	0.289731660680002	Activation
CCGAGTTTCGGCCAAGGGTA	YLL027W	5.85321379936034	12.7323666478346	2.29893062934505	0.129463103894957	0.289910334926838	Activation
AGCCTTTAGATCTAGAGATG	YHR073W	5.65410145945254	10.8657539953757	2.29872330232288	0.129480387283838	0.289910334926838	Activation
AAAAGATTGTAATTTAATTG	YDL141W	7.39814543160722	11.5095275722459	2.28655626718589	0.130499185435064	0.290410786693133	Activation
ACAGTCATCGTTGAAAACGA	CUT630	6.80959692521103	15.7328226382285	2.28245921366367	0.130844258466903	0.290410786693133	Activation
GATCTGAGTCAGGAAAGACG	YHR027C	6.64712163788094	11.7684671511965	2.28402343547762	0.130712392425515	0.290410786693133	Activation
GAGACTTAAATGCTTACGGG	SUT230	6.338240771693	11.4419529407791	2.2844164662725	0.130679282696452	0.290410786693133	Activation
GTTTTCTGGAAAATTCCACG	YLR259C	5.45432720089256	7.77386359465033	2.28667910300342	0.130488855309842	0.290410786693133	Activation
AAACACTTTGTTAGGCATGG	YER145C	-5.46308865436505	7.73571400871186	2.28182317470532	0.130897919850841	0.290410786693133	Activation
AACCAAGTTCAATCAGACCC	SUT521	-5.29138900128651	8.70367951791234	2.28628667425288	0.130521860592516	0.290410786693133	Activation
GCTTTACGCACTAGATTGTG	YDR161W	-5.20319684638095	7.47125364504425	2.28299240758192	0.130799292827876	0.290410786693133	Activation
CGCTACACGCCTAGAATTGG	SUT099	-4.61947915015419	6.96249972641565	2.28423125401845	0.130694884195238	0.290410786693133	Activation
GTGTATACGTATCTTAAGCT	YJR151C	-4.15498066217734	5.10959929677139	2.28162132916892	0.130914954301617	0.290410786693133	Activation
AACTCTTTCGACGTAAACAC	YNR043W	7.26464378681858	10.0332146139265	2.2763700799934	0.131358995857546	0.291126499137149	Activation
GCGACTCTGTGCTTTTGATT	YDL052C	5.99087198998072	9.08362646332019	2.26851805177328	0.132026096015952	0.292334790624425	Activation
GTGGACAGCTGAGATGAAGG	YDR506C	7.09135977082211	12.9087930543007	2.25872416867716	0.132863480879988	0.292836973483649	Activation
CGATCGTATCTCTTGTCGGT	YMR214W	6.9126886926785	13.1596722282455	2.258980105568	0.132841522740206	0.292836973483649	Activation
AAATTTTTCCGACAAGAACG	YLRCtau1	6.90378125222621	13.1199699222536	2.26201232391954	0.132581681409193	0.292836973483649	Activation
CCACGTTAGTCACATCTGGG	YFL028C	5.43252672874375	9.07273999335155	2.26436688828568	0.132380302100235	0.292836973483649	Activation
GTAGTTCATGTATTTATCTT	YDR069C	-3.95444491895033	6.25700068965882	2.25957964130604	0.13279010135894	0.292836973483649	Activation
GCCATAAAATCTAAACAGAA	YOL006C	7.03892716664037	9.46912387926241	2.25201118381337	0.133440872789896	0.293300836801256	Activation
GCAAATAAACGATCCTATCG	YFL034C-A	6.21498268722253	11.5799297961188	2.25221590262793	0.133423223288498	0.293300836801256	Activation
GAAATAGTGGAAAAGAAACG	YGR050C	-4.23908005140862	5.22114087493208	2.25484681288331	0.133196635626779	0.293300836801256	Activation
GCCGTAATATAGGCAAAAAG	YEL011W	6.26319923684162	12.5404086425518	2.24912018817516	0.133690394087518	0.293580187748963	Activation
GGATGAAAATCTAACAAGAA	YOR094W	-4.24115920000076	6.58273136941402	2.24231376749984	0.134279916902541	0.294604977797157	Activation
GCCCATGGGAGAAAGGCTCG	YNL178W	-3.75318390154216	5.77059109647798	2.23188053973778	0.135189218773658	0.296328836032205	Activation
AATCTTTATCATGTGAACTG	YDR075W	-4.16858284836032	6.37003203098901	2.22907882846171	0.135434572064423	0.296595528594052	Activation
GAGTATATAAGCAGAGCTTG	YPL111W	5.84538083627812	13.2740481959276	2.22500495125934	0.135792221869689	0.297107434346272	Activation
ACACAAAGCCACTGAGAGAG	YCL042W	6.67769746435343	8.8488088141537	2.22135172753431	0.136113841310728	0.297371593470842	Activation
GGTTCTCCAGCAGATGTCGC	YOR084W	-4.28331579782808	6.85838488927747	2.22081719528212	0.136160971489151	0.297371593470842	Activation
GTCGTGACTGAGCTGCAAGG	YFR036W	-4.74152454361285	7.43613480231497	2.21886682089666	0.136333092739951	0.297476575423479	Activation
GCAAAACAGCCTGAGAGATC	YGL200C	-4.9960930975926	7.26637817542695	2.21603796861914	0.136583173110414	0.297751317380703	Activation
AATCAAAAACAATACGATTG	YJR083C	5.84524999522683	12.8051651600495	2.20712171088459	0.137374769516025	0.299204993005839	Activation
GGGGGAGCGTAGTCGTAAGC	YER056C-A	6.47726124063646	11.7885763437947	2.2053722737234	0.137530689196337	0.299272770138672	Activation
ATTATAAGACATCTTGGTAT	YNL262W	7.27370965387302	12.2512500365065	2.19399916955132	0.138549174014367	0.300761436550998	Activation
AAGTACAAACATTTAACGAT	CUT741	5.18564857281359	7.9505728401724	2.19185814676113	0.138741851401949	0.300761436550998	Activation
GAGATTGGCGTTTGGAGAGG	YEL009C	-5.44689536542978	8.35619288798468	2.19074756853676	0.138841914204318	0.300761436550998	Activation
GTCCTCGTATGCCCAAGCAC	YDR432W	-4.88550014911374	7.15584891837433	2.19324386552535	0.138617111921334	0.300761436550998	Activation
CAAATTGGGCCCATGCCGGG	YBR049C	-4.84945298416413	7.1191274183203	2.19500847338479	0.138458447676847	0.300761436550998	Activation
GGGAATATATACTTACAAAT	CUT409	6.70978033839382	11.5692754579062	2.18501778778232	0.13935945399459	0.301015737377231	Activation
AGGAGTTAATTTTATTTTAC	SUT630	6.68596822793831	8.85702111656832	2.18355471937598	0.139491951655976	0.301015737377231	Activation
GCTATTTCCTGGGTTTTCTG	YML089C	6.23030544444679	12.6705659405034	2.18642757562325	0.139231915093723	0.301015737377231	Activation
GGGTAAAATTAAAAAGATTG	SUT479	5.65532227566607	12.1049075716219	2.18250671456124	0.139586947440984	0.301015737377231	Activation
GGTCAAGTTTAAGATTAATC	CUT658	-4.79420421014053	7.06375618494978	2.18532381231483	0.139331757818893	0.301015737377231	Activation
GAAAAGTGACCCCATCAGGG	YOR362C	5.83105715814677	12.6465706935234	2.17906334872305	0.139899580922832	0.30141886347974	Activation
AATGAGTCTTCTGCTTTATG	YOR316C	6.45013074590617	8.88993952334077	2.17127563951284	0.140609554011218	0.302405121541615	Activation
GGATCTTTAATTCTGTTTCT	YGL047W	-4.98508945072282	7.25889584337478	2.17262283570229	0.140486446851163	0.302405121541615	Activation
GTATCAACTTATGACTGCTC	YDR120C	6.39709240751244	11.9657389027651	2.16833403784588	0.140878779738088	0.302712646784889	Activation
GCAGAGCCATTAGTTTGACC	YLR009W	6.10397005000666	9.46292256677559	2.16252475256536	0.14141216882861	0.30358673308058	Activation
ATTTTTTGAAGCGTGTTGGA	YPL022W	6.32202299254084	8.84270760250361	2.15524330165254	0.142083935172939	0.304756061310114	Activation
CCAAGTCGTGGCAATAAAGG	YAR019W-A	6.4564686579247	12.2805595287832	2.14766438140103	0.142786958589227	0.305474730173034	Activation
GACGATATAAACTTATGCTG	YOR089C	6.4137532165208	10.0904829331617	2.14931460708809	0.142633550501104	0.305474730173034	Activation
TTTGCTTTCGCCGTTCGGCG	YLR312C	6.09060643088254	12.5085901898952	2.14674329946844	0.142872664803421	0.305474730173034	Activation
GCTGGTGCAGCTATGGACAT	YIL010W	6.06565744856835	12.5589718383027	2.14614310784956	0.142928543475456	0.305474730173034	Activation
CCATCAGCCATCTCAAGTGG	YDL164C	5.68464160742729	9.32502216402225	2.14370045049901	0.143156212060936	0.305688866003673	Activation
CGAAAATGAACACGTACCGT	YGL078C	5.96785879196324	11.0200128506856	2.12968069492513	0.144470848101039	0.306856593220808	Activation
CGTTTCCCTACGGTATTGGT	YNR044W	5.95918626648887	8.27617035087244	2.13493932712005	0.143976158503416	0.306856593220808	Activation
GGAGTTTTGAGAGGGGCGCG	YLR111W	5.79242206280201	13.4967310337812	2.13065028792224	0.144379492892072	0.306856593220808	Activation
GCGCAATACATCGGTTTGGT	YHR069C-A	5.63936635417608	12.3700682321148	2.13482432644994	0.143986956416277	0.306856593220808	Activation
GCAAGTAACAATGACAATGC	YFL041W-A	5.16219275689275	9.88807140920857	2.12994443920451	0.14444599162831	0.306856593220808	Activation
GCTGTTAAACTGTGTCATGG	YLR382C	-4.1727345901559	6.60674519478176	2.13276030249399	0.144180911721075	0.306856593220808	Activation
GTCGTTATCGAGTCGCGATG	CUT624	6.7284863702408	9.54440449110356	2.1253463188966	0.144880030573065	0.307453374614345	Activation
ACCAAAATATAATTAACTAC	YLL042C	5.31645107874276	9.01265061420541	2.11793746967317	0.145582482722057	0.308670905011046	Activation
AAACGTTAGTTCTATAGGCA	YOL137W	6.28909682391041	11.0886081446323	2.1112655769804	0.146218348553549	0.309745229533048	Activation
CTGTGTATTTTCCGCATATC	YLR372W	4.7430339006939	6.94664046394154	2.10807710126741	0.146523332224595	0.309947433662751	Activation
CAATCTTGGATTCTACTCGG	YHL038C	-4.51111654888578	6.78329833475819	2.10756579868635	0.146572305993978	0.309947433662751	Activation
GTTGGAAGCCGAATCATGGC	YNL078W	6.55165770434175	13.2464754174684	2.09941503134372	0.147355504668721	0.310235733270934	Activation
ACGCTGTTAGGCTCGATCAG	YJL139C	6.08065754398874	13.2016363877555	2.10106682049169	0.14719640523791	0.310235733270934	Activation
GATGACTTTTCATGAGAGGG	YDL024C	5.93139432097127	12.8455451170262	2.09981500237728	0.147316961877291	0.310235733270934	Activation
GCTTTCTTAAGCTCATTCGG	YLR335W	5.83833713317563	13.5018993873342	2.09990296006026	0.147308487453134	0.310235733270934	Activation
GATTTAATAAGAGTATAGTC	YLL034C	5.68336427649582	12.3108316820839	2.10209537410512	0.147097433453829	0.310235733270934	Activation
CGAACTGGCTTGCTAAAGCT	YNR016C	5.2611169653923	11.6726756062504	2.0918236312418	0.14808920460427	0.311506940913194	Activation
CTTCGTGTATTCTTATATTT	YDR100W	6.16927503990345	9.23499392456974	2.0887775558177	0.148384763102326	0.311582015691224	Activation
GATATATAACCATATGTATG	YPR166C	4.95516518874904	7.41872281739079	2.09009369263528	0.148256977640661	0.311582015691224	Activation
GAAATGTCAGATTCAGAGGG	YMR091C	5.72959361273657	10.4182252413321	2.08692986580283	0.148564367726014	0.311686223803133	Activation
GTGCCCAACGTCAACAAAGC	YFL021W	6.08457137362503	10.8886699861465	2.08384626301984	0.148864656365607	0.311770695165699	Activation
GGAGCCGATTAAGGTCGTGC	SUT494	5.93237670157155	8.42399295102736	2.0850139271405	0.148750865839266	0.311770695165699	Activation
CAGGAAGAACAAAGGGCTGG	YPR081C	6.36898969453691	10.9940484526082	2.07339993114793	0.149887054507001	0.31363800759842	Activation
GTAATAAATTCGGGGTGAGG	CUT418	3.74187741123461	6.37329392993851	2.07064197411475	0.150158302759519	0.31393165651031	Activation
GGGACGAACTTTGCGCGAAG	SUT460	6.80739178476085	13.2401273373973	2.06131063710048	0.151080176129995	0.314617127913495	Activation
AGCATTGGCAAAGACTTGAC	YGL124C	6.21046805616172	12.2048977812464	2.06240903280475	0.150971330208005	0.314617127913495	Activation
AGGTGTACCCCTATGATCAG	SUT098	4.85605494617086	8.28352049906595	2.06068540684959	0.151142173209486	0.314617127913495	Activation
GCTCTCGTTTCTGATAAACC	SUT476	4.77782951110128	8.69982962613819	2.06384154439393	0.150829508252469	0.314617127913495	Activation
GGAAATTCGGTGGAACACAG	SUT088	-2.84941532084773	4.8537047061851	2.06118672918975	0.151092460402449	0.314617127913495	Activation
GGGAAAAAGGAAGAATTGCT	YDL078C	5.94994923376458	12.6873845517819	2.05511355278175	0.151695945094281	0.314688183005124	Activation
AAATCGGCATCTTTAAATGC	YCR011C	5.10038261573374	9.08551610648496	2.05715618628899	0.151492666918288	0.314688183005124	Activation
GAGGCAAATATTGGCATTTG	SUT745	4.68107497042713	8.60377905949501	2.05506053074278	0.151701225835665	0.314688183005124	Activation
GGCAGAATCACTTTAAAACG	YBR249C	-4.43645282508384	6.71296123765724	2.05593052140789	0.151614605229706	0.314688183005124	Activation
GCGTAAGGACGCCATTGCGC	YNL152W	5.63036576439009	13.6800499114522	2.05074524233014	0.152131706568922	0.315308411713289	Activation
GCAAAATACGAAATATTCAT	SUT775	6.21193639560046	9.855037553691	2.04679892649893	0.152526591049375	0.31585385607634	Activation
GCAGGCGCGACGTGTGCTGG	YER152C	5.91589711205538	9.0998152057077	2.04348236267669	0.152859358102476	0.3162698366952	Activation
GCTCCTGAAGACACAAACAC	YBL006C	4.8419012091755	7.34712074362576	2.04205794327859	0.153002529516899	0.316293160156485	Activation
AAAGATTGATAATGAGAAAG	SUT364	6.29052623838895	10.6242071333015	2.03345977155989	0.153869984559879	0.317812422889398	Activation
AATTTGGAAGAAGAGAGAGA	YNL182C	5.77155289506049	8.35490502623183	2.02951188663213	0.154270146980081	0.318090982337261	Activation
GAAAGCTACTGAGCAATCGG	YKR029C	5.55294014353935	12.9868603229923	2.03063099404773	0.154156593151418	0.318090982337261	Activation
AGGACTATCCTCTTGAATTA	CUT344	6.82302624473451	11.6865176138231	2.02112238643353	0.155124443177502	0.319378260922412	Activation
GCCCTGATTATATATAGATG	SUT598	5.87874249782848	11.2279525139864	2.02076620456798	0.155160831515684	0.319378260922412	Activation
AATATTATAATTTTTGAATT	CUT253	5.25961600668607	11.948773810218	2.01770396495584	0.155474076829242	0.319748573101648	Activation
GGTGATGCGTGACGCGTTTT	YLL022C	6.14469897179815	12.4471214825685	2.01469104151378	0.155782978326283	0.320109324786998	Activation
CAGTAACTGTTCTAGCGCAC	YKL001C	6.57782215182228	9.8710807728615	2.01155567272928	0.156105173804459	0.320496752382785	Activation
ATAAATTTTACCTTTTGATG	YOR128C	5.65327613005026	8.22212754201514	2.00661583389097	0.156614336390163	0.320992460396249	Activation
GCCTTTGGCACTGATAGTTG	YDR275W	5.51679995611204	13.0681196325923	2.00668827591576	0.156606855975857	0.320992460396249	Activation
GAACTTCTAATAAACCTTAG	YBR085W	4.91628719023517	7.59167392060041	2.00383950103478	0.156901328657026	0.321306051340348	Activation
CGGCATTAATACCTGAGAGC	CUT009	5.97351680697443	13.3917820088698	1.99917410012647	0.15738494290963	0.322021410492572	Activation
GCAAGACTAGTGGCCTGGCG	YDR389W	5.25548310537916	12.6381508490331	1.99374963222911	0.157949373938175	0.322900766158348	Activation
CGAATGCAGGAGTTTTACAG	YIL068C	5.61648474572006	8.18621648211998	1.98770970571062	0.158580555897218	0.323914968519191	Activation
GATGCCTGGAAATTTGCGGG	SUT742	4.81562064235042	7.70405610456652	1.98368889028091	0.159002328670284	0.324500071618162	Activation
GGAAAGAACCTCTACAGCAG	YER179W	6.76916961754855	12.2743382873283	1.97559433591824	0.159855304708592	0.324752964597013	Activation
ACGCTAGCGAAATGGGTGTG	SUT473	6.54555922306146	10.3862605806109	1.97863019344024	0.159534787443169	0.324752964597013	Activation
GCGACGCTCAGAAAAAAGCT	YGR091W	6.13694318852039	12.0330591270989	1.97525785745848	0.159890874278555	0.324752964597013	Activation
CGACGCAGCATAGGAAACAG	YOR347C	5.95459064385808	10.81977583245	1.97639190811901	0.159771028320718	0.324752964597013	Activation
GTATTTTTGGACATCAGGGG	YOR036W	-4.30186150954919	7.27926003887785	1.97480459331228	0.159938803665168	0.324752964597013	Activation
GGCCCAGCCAAATCTTTTCG	YGL038C	-4.11131477963374	7.31693364716122	1.97866339164478	0.159531286517961	0.324752964597013	Activation
GAAGATCATGGGGAGGACGA	YHR130C	6.74027584205986	12.2185627701769	1.96603975062253	0.160868848273671	0.326365057665196	Activation
GGGGCCCCCTATCTTGGGCG	YCL042W	-4.22839709661317	7.20758969988009	1.96453036095062	0.161029632139021	0.326415095409445	Activation
GTCGATGGTTTCTTGGTCGG	CUT496	6.81873107154532	12.5395007231683	1.96201673143699	0.161297796816086	0.32652444217617	Activation
GCGCAGCGCGGAAGTGATGG	SUT449	6.07172471426694	12.5588310070682	1.96147267026275	0.161355906579967	0.32652444217617	Activation
GTTTCTTGCCCGGAGAACTG	SUT699	5.47755087212212	13.3695105914733	1.95512761188866	0.162035371591742	0.327346942777588	Activation
CGGCCATGAGTGACGATGGG	YNL305C	-4.00758745649376	7.37569933656022	1.95569133351096	0.161974873157665	0.327346942777588	Activation
CCGTTCGGTAGGGAGTGGCG	CUT380	5.77053882247253	10.0891267119115	1.95082443983978	0.162498037180847	0.328005297272451	Activation
ACTTCGTTATTTCCGCGGCG	CUT765	6.28347302850599	9.44966899826708	1.94854650470675	0.162743564818861	0.328145278361866	Activation
AGAGACATTTTAGATATAAG	YER019C-A	5.36102668355248	8.47570812782262	1.94489623465478	0.163137893311495	0.328145278361866	Activation
ACGCGACGCGTTTTACTTAT	YNL102W	5.03693673076991	8.00924935725683	1.94384560689861	0.16325159177886	0.328145278361866	Activation
GGCATAAGACTATATAAAAG	YGL108C	4.21899508609984	7.24936948385053	1.94514665385135	0.163110806402582	0.328145278361866	Activation
GATCCGAAGACACCAATTGC	YDR047W	4.14482843474723	7.58945441768934	1.94462254867308	0.163167502775452	0.328145278361866	Activation
GCAAGGCTTTGCGCATGCAC	CUT743	4.80787886224856	7.95421554690981	1.94137468160595	0.16351935103912	0.328408210880913	Activation
AGCAAAAGTAGATCATTCAC	YGR195W	4.8189186925879	9.55252190821832	1.93569178481521	0.164137077890343	0.329372981406731	Activation
GCTAATAAAGAGGTAACGGT	YDR498C	5.09794689203383	7.70033920073705	1.93357282032072	0.164368089879088	0.329560768837838	Activation
CTGCTCTTGAGTTTGATTGG	YBL021C	6.49497302318609	10.9888563847592	1.92671287580822	0.165118521893876	0.329725245838461	Activation
GTGAGTGTGAATTTGTGCTG	YDR109C	6.23939904549557	9.40614665801893	1.92723586337118	0.165061172835222	0.329725245838461	Activation
CCCTTAGGGGGACTCAACGG	YPL230W	6.21700203829759	9.2023860322152	1.92653873063547	0.165137623124267	0.329725245838461	Activation
ATTTAAATAAGAAATATTGT	YPL129W	5.04575782412582	8.51553465428109	1.93011519143461	0.16474584292424	0.329725245838461	Activation
GGCTGGACGATCCAAATGCG	YCR009C	-3.57633934540473	6.72464641187277	1.93086663363988	0.164663662003861	0.329725245838461	Activation
GCTACAGACGCCACGCGGCC	YIL101C	5.56234021284656	13.9569449393719	1.92264366807086	0.165565516716225	0.330304583265813	Activation
GGGCATAGGCAGCAGCTCAC	YHR050W-A	4.89057668860093	9.80969818780938	1.92005581435843	0.165850507533398	0.330598102298494	Activation
GCGTCAAGAGTGAAGAAGGG	YCR086W	6.06745809579832	13.1118211980002	1.91329401240977	0.166597813079084	0.331097224052412	Activation
AGACCTTTCAGATCAAGAGG	YFL014W	5.38622795759562	8.77464832481999	1.91279433135837	0.166653189921293	0.331097224052412	Activation
GTGACAGTGTTATTAAATCG	YGR194C	5.22099732550823	12.0858453241737	1.91535008409642	0.166370171745345	0.331097224052412	Activation
GCATTTGCTCTAAGAGTCGG	YEL024W	-4.27445789555714	7.75153263164814	1.91344302453719	0.166581302980196	0.331097224052412	Activation
AAAAAATATTAATAATAGAT	YGL078C	5.88501319554699	11.6203006865521	1.90644540414545	0.167358644066269	0.332223533502412	Activation
GGAAAAACAGCAAGAAGCTG	YPR074C	-3.70072152739809	6.99122332142537	1.88573132537702	0.169684172500075	0.336561328085344	Activation
GTAAAAAAGATGCGCAAGCC	snR33	5.61122241143507	13.3650469604742	1.88416821003383	0.169861158776378	0.33663393284773	Activation
GTGATCCAAACGCTAATGCC	YNR037C	6.3674878073157	10.6537651487935	1.87534146700165	0.170864566393201	0.337228996058351	Activation
GAACCTATAATATCCGAATT	YMR005W	5.68316442451201	10.5542001303822	1.87762786677731	0.170604001245499	0.337228996058351	Activation
ACCAAATATGGTCGATGAAG	YNR054C	-4.13299655418193	6.42510016006968	1.87761282000512	0.170605714529832	0.337228996058351	Activation
GGAGGTGCCCAATGTTACGC	YJR013W	-4.08752070433141	6.37907462587353	1.87634749641662	0.17074985992988	0.337228996058351	Activation
GGTGCAACAGGAATGTACGG	YBR118W	-3.54150546477505	5.91539803840592	1.87906659263778	0.170440273498672	0.337228996058351	Activation
AGATCTTGCGAAATACTGGG	YOL123W	5.48211134744079	13.6927859658918	1.87262932972521	0.171174242694121	0.337562363470808	Activation
GTTTTGAAAAGAACATTAAG	CUT694	4.32717396212824	6.7920010312642	1.86823236355416	0.171677666467195	0.338276946744728	Activation
CGAGCAGCGAGTAAGCGACT	YNL245C	5.87887546981646	8.74831152801814	1.86602682790653	0.171930826381635	0.338497636833465	Activation
CATATTCATTATTTATAATT	YMR258C	5.96978800477983	11.0983594834725	1.86127967201334	0.172477180400855	0.339294732240566	Activation
CCAGCGATGGGTGAACATGG	SUT796	4.3495308484995	8.4279153360642	1.8577644083784	0.17288304146166	0.339814371659885	Activation
CGTCTTCTCCGCCGTCTACA	SUT752	5.9073610945079	12.6723534597378	1.85203391731206	0.173547022926062	0.340840099080013	Activation
AAAGTCTACTGGCCACTGCC	YGL215W	4.74626163472639	8.20112209301467	1.85045280954107	0.17373073911446	0.340921695905462	Activation
GTTTTTTGGAAGAATGAGAT	YMR040W	6.33957527007177	11.2494027857798	1.84638241461071	0.174204727830556	0.341293249458884	Activation
GAAAACAAATTACCGTTTCG	CUT604	5.3495282960053	9.23843408349641	1.84673895571669	0.174163149952191	0.341293249458884	Activation
AGGATCGCGTCCTTTTGCGG	YBR015C	-4.22908726727395	6.52586655410162	1.84501982354052	0.174363731093167	0.341325899723604	Activation
AAATTTTGTTTCTCCAAGTC	YCR095C	5.40626779900837	12.0051571241969	1.83731179682405	0.175266348176892	0.342812971393302	Activation
AAAATAAACGTATACAGTAG	CUT832	5.37014033563253	12.082188405432	1.82851461371114	0.17630309269337	0.344086520035422	Activation
GAAAAAATTTTTTCATTGCT	YLR073C	5.3493696010411	11.835125990166	1.82813550853568	0.176347928742091	0.344086520035422	Activation
ACGGCTTCAGCCTTAAAATT	YMR312W	4.94571384148676	7.20739638205037	1.82928246397543	0.176212320770857	0.344086520035422	Activation
AAAAACGTACGAGCAGATGG	YOR037W	5.29049573349933	8.01501125102324	1.82522954271101	0.176692048869521	0.34447766925944	Activation
GGTGGAATTCTAAGCAATTG	YLR041W	-4.11298153351381	6.41159275010763	1.8228255134148	0.176977315952144	0.34475353668013	Activation
AAAATAAAGGAACAAACAAG	YKL140W	4.94201155793183	8.3738850433844	1.81994014605672	0.177320401495079	0.345141495767207	Activation
GTGCAAGAGATATGGAGACG	SUT595	4.68583073515724	7.50343715422981	1.81866528314208	0.177472233919589	0.345156866941747	Activation
AAAACCAATAAAAAATGTTC	CUT739	5.3507040146327	8.73227752886878	1.81435399543655	0.177986808602198	0.345597058322324	Activation
AGCTTTTGGCTAAATGTTGT	YBL076C	-3.97428330087842	6.2720531966951	1.81497250087897	0.177912881027787	0.345597058322324	Activation
GGGCAAGACTACATACAGCG	YBR240C	5.64821955668	10.8335705319801	1.80884898049471	0.178646367194623	0.346037147441604	Activation
ACAGATGACATCTGGGTCTG	YIR021W	4.97778499977783	8.32840897328437	1.81009783530342	0.17849649406477	0.346037147441604	Activation
AAATTCCTCAACACGTAGTG	YLR163C	-3.45023404737562	5.83273077959223	1.80887873478873	0.178642794737876	0.346037147441604	Activation
CGTCCTTCCACCATCTTCTC	YKR062W	-4.08879610324558	7.8934643132239	1.80450236970057	0.179169132000477	0.3467696356232	Activation
GGTGGTACGTTATACATGTC	CUT280	5.27110214505555	11.5825832279149	1.80209103180272	0.179459904761377	0.34705229969176	Activation
GCTTCAACAAGCTTAAGACC	YLL050C	6.10437082365419	9.8849562509712	1.79960429374086	0.179760341198344	0.347078807395907	Activation
GCGCAAAGTTCGTCCCAATG	SUT460	-4.36689032046228	7.30531516050729	1.7995816019114	0.179763085398547	0.347078807395907	Activation
GGCGTTGACACTGCCTTCTG	CUT657	5.33849822401158	12.7344860514679	1.7918692191067	0.180698583003823	0.348324117398045	Activation
GAAAAACTGACGAAAAACGC	YDR194C	5.14844611981892	11.8023023047998	1.79282537250638	0.180582298110342	0.348324117398045	Activation
AATAATAAAATAGAAAGGAA	YLR440C	5.62982022540614	11.0585031318376	1.78753875596659	0.181226328803423	0.348500991556221	Activation
GAGAAAAGATGGGAAGTGTG	YBR241C	4.77139684207251	7.85744917288046	1.78863120081326	0.181093026453434	0.348500991556221	Activation
AAAATAAATTGTACGAACTG	YMR308C	-3.85080968585324	6.15010720704371	1.78851687222222	0.181106971743079	0.348500991556221	Activation
GAGATGCGTATACTTATGGT	CUT480	5.4687944599635	10.4936586266075	1.78092954237807	0.182035225407079	0.349495973199499	Activation
AATCTAGATAAATTTGTAGT	YDL204W	-3.84433588550022	6.14442239817163	1.78175399190439	0.181934093761802	0.349495973199499	Activation
AATAAAAGATGATAATCGTA	YDL213C	5.68990716934242	10.1286380743845	1.7760151320816	0.182639407564227	0.350375439471214	Activation
AGGCAAATCTTCGAAGAAGC	YBR260C	5.22785748324326	12.110366303057	1.77452588623413	0.182822955342578	0.350447199769386	Activation
AGAAATAAAGCACGTGTGCG	YAL005C	-4.04888902704108	6.35376221251625	1.76681793375781	0.183776375555612	0.351993409410828	Activation
TGCGCTTTGATGGCCCAACG	YER045C	5.77311436630077	12.7602047961878	1.76342763339882	0.184197557164939	0.352518549147266	Activation
CGGTTAAAGACTCATCAGCT	YKL126W	5.70013921342661	8.82914228149767	1.75813880301684	0.184856834179656	0.353498156589167	Activation
GAACTGGTGATAAAGAGAAG	YER152C	5.07063575683315	7.96655606259033	1.75326663948128	0.185466596752858	0.354381592839325	Activation
CATCGCTACAAAAGTCAGGG	YKR019C	5.48305523128704	10.1157062350759	1.74959615705337	0.185927509101547	0.354979432185915	Activation
GGAGGCTCCCTTATAAGGAC	YEL025C	5.79044909055336	11.6951752796161	1.74533638092174	0.186464090012733	0.35572067450321	Activation
CCTAAATAACAGGTTACCCT	YLR426W	5.42494737942873	11.0914071410543	1.73883943675689	0.187285944977509	0.357004527866507	Activation
GATATATATCCGTAAAGATC	YCR016W	-3.85131846202854	6.15865817043659	1.73160819180183	0.188205646849942	0.358472709409182	Activation
ATGCCTGCATCCAGCCGTGG	YPR152C	5.67444291213966	12.6770759826342	1.72766869119616	0.18870890124837	0.358576818695397	Activation
AGAAGTTCCCTATGATAGCT	YDR363W	5.46385799976111	10.4669177170772	1.72792879710404	0.188675625565536	0.358576818695397	Activation
AAAACTTTTGGTGAAGAACG	SUT235	-4.3431600671135	7.28659141876406	1.72886165411857	0.188556340142174	0.358576818695397	Activation
GCAATTGGTGGTAATGGCGT	YCR079W	5.83089532967503	9.48330597477736	1.72208931527175	0.189424326231077	0.358716244846007	Activation
GAATTAAATTCTTTACTCAA	YNL102W	5.64232537015454	8.86346885855265	1.7213968693015	0.18951333648258	0.358716244846007	Activation
GCAGGCGGCTCGCCATTTGG	SUT104	5.28009673414259	13.1391808871043	1.72016325740885	0.189672031506569	0.358716244846007	Activation
AGAAGTATTATAAAGGATTA	CUT813	5.27150820032228	9.70775924241014	1.72539281420343	0.18900034877694	0.358716244846007	Activation
GACTTGATCTTGGGGGAGAG	YNL181W	4.93317681324203	11.2205786937887	1.72334366218556	0.189263210585331	0.358716244846007	Activation
CACTTGCCGTATTCGTTCAC	YEL046C	4.92032387227623	7.61180936973181	1.72010277676722	0.189679815873535	0.358716244846007	Activation
ATGTCGTCAAGCCTGATAGG	YJR141W	4.16312138765531	7.17728220459427	1.71376369796578	0.190497777209357	0.359979251180488	Activation
CGAATCCTGCCAGACTAGGG	YBR084C-A	4.59364947261573	10.9525425255454	1.70978807234627	0.19101286933663	0.360668394227747	Activation
GTACAATTAGAGTTTTTCTT	snR63	5.06255358332147	8.73509937115684	1.70561190208698	0.191555695018177	0.360840971448224	Activation
CAATCTGGACTTTTTAAAGC	YLR390W	4.52324237567859	8.2827212194928	1.70581955830822	0.191528661023664	0.360840971448224	Activation
ATACTTACGTAGTATGATTT	YMR125W	4.40789372333563	6.58240761914387	1.70765557378651	0.191289830557956	0.360840971448224	Activation
GAGGCACAGTGTGGCAATGG	SUT285	5.40601119183531	11.8730955418143	1.69930764513886	0.192378546918623	0.362106558485761	Activation
TGCCACCACCGCTACCTCGG	SUT680	4.8962508063056	7.7415440447383	1.69802183155185	0.19254688171711	0.362139154790298	Activation
AGCCTGCGAAGTTAGCAACC	YMR079W	5.40673952691898	8.83341501045057	1.6962431617625	0.192780023399816	0.362293492251378	Activation
GGTTTGCCCCTCATGATCTT	CUT035	5.8612990524117	10.101472556512	1.6898531126347	0.193620333288428	0.363587751938646	Activation
ATCACATCCGTTCCTAAACG	YPR055W	5.62236824238485	11.9826058199616	1.68417912987758	0.194370068722094	0.364710035051316	Activation
GAAAAGTCATAATAAACGGG	YPR004C	4.96345701619133	10.6391605599458	1.67797443110218	0.195193820518808	0.36596933667248	Activation
AATTTCTGGAATGTTTTCGG	SUT219	5.09620676486985	8.32597899999859	1.67217932096855	0.195966886498781	0.36690487293611	Activation
CCCGTTCACCTATAAAACCG	SUT581	4.80954627841145	8.93847086675788	1.67079703054688	0.196151812804042	0.36690487293611	Activation
AAACGGAAGTTTTCATGTGT	YER016W	4.30208807045264	9.04227026670253	1.67152010011471	0.196055053250492	0.36690487293611	Activation
ACACACACATATATACATAT	CUT161	5.42152499168636	12.0604221649368	1.6690443566072	0.19638658391013	0.367057699311373	Activation
AATAATGAAGAACAACGATG	YNR075W	5.08715199937413	8.31721604240719	1.66563376101443	0.196844378258146	0.367478634210589	Activation
AATACTTATATCGCTCGACA	YNL131W	4.39017741244109	6.76225864148109	1.66508403037211	0.196918283970228	0.367478634210589	Activation
GGAATGGTATGTTTGATCGC	YLR079W	-3.6692170113815	5.98426778356242	1.66096089761483	0.197473635330059	0.368228442862738	Activation
GAACACTGTTGCGGAATGCG	YHR083W	5.84788660609864	10.5763953166099	1.65624208190619	0.198111475183741	0.368974889658935	Activation
GCCAAGAATGCCCCGAACAG	SUT251	4.4299923990012	8.21813061763949	1.65572382017651	0.198181675513223	0.368974889658935	Activation
AGAAAAACGCTTAATATCAG	CUT853	5.60959720006527	9.32997872550339	1.65111472800664	0.198807278545598	0.369570988716815	Activation
TAACAAAAAGTTATTGTATG	YNL026W	5.02973620399432	11.7163180976557	1.64956346172621	0.199018356695692	0.369570988716815	Activation
ACAATGTTTGCCGTCAAGAG	YKL096W	3.93429665212187	6.33117737724627	1.65091127906496	0.198834946518144	0.369570988716815	Activation
TAATTCCAATATCGTAAGCG	YER073W	-3.73309759317281	6.05081023480477	1.6488295227592	0.199118314187709	0.369570988716815	Activation
ATACTTTCCAGCCTACTCTG	CUT779	5.97943062680498	11.7571850084808	1.6404772674771	0.200259997715277	0.370276057007122	Activation
GGTTATGAATAGTAATGAAC	SUT553	4.97821266102264	7.60811842898755	1.63927729689352	0.200424654710277	0.370276057007122	Activation
GCTAGAAAGAAATAAGGAAA	YGR175C	4.76248312039799	7.58381711405314	1.64054848661384	0.200250230199886	0.370276057007122	Activation
GAGAACCAGAATAAAGGCGG	YJL136C	4.55030040139438	7.08702891495903	1.64405639154319	0.199769822396123	0.370276057007122	Activation
GGTAAGATCTCGCCTTGATG	CUT555	4.53116847183958	8.5373318549676	1.64114653574132	0.200168231434946	0.370276057007122	Activation
GCAGATGGAGGACCAAATGG	YIR004W	-3.6638192741045	7.55098199737153	1.63936092165828	0.200413174770687	0.370276057007122	Activation
GTGACGCGTCACTTCAAACG	YER111C	4.87648908185272	13.8084296697772	1.63399717795323	0.201151072912994	0.371332003730069	Activation
GTCTCACTAGAACTTGCAGG	YLR195C	3.87764608339664	7.63476281521047	1.63238965638859	0.201372843863439	0.371455445834252	Activation
GCCCATTCTAGTCATTACGC	YDR381C-A	4.27507954086473	8.7498652007467	1.62796380412146	0.201984914510253	0.372298097613825	Activation
GAAAATGAACACGTACCGTG	YGL078C	3.96800989536825	7.81868279631662	1.62583866894436	0.202279586587948	0.372491127929439	Activation
TTTTTAGATAACCGATGATG	YOR179C	3.45076361105216	5.98384170488689	1.6249690910206	0.202400308462076	0.372491127929439	Activation
GGAATGTGTGAGGACTGCAG	YOR085W	4.65075373182053	8.7114548556371	1.62057514226397	0.203011610849394	0.373054218313448	Activation
AATTATAATTCTAGGTACAT	YGR017W	-3.30635446063774	6.44012072551004	1.62053351636846	0.203017412384925	0.373054218313448	Activation
ACTATCTCGGCAATTTGATG	YJR042W	4.49215266382103	8.00346614370356	1.61667571518556	0.203555935341635	0.373485888730722	Activation
GGATTATATAATAGTTATTA	YDL044C	3.81503983484839	6.58379879947162	1.6166192730776	0.203563826760239	0.373485888730722	Activation
GTCTTCAGGTCAGTGCATTC	YKL053C-A	5.77170127576329	10.9727897231579	1.61468435451702	0.203834574346669	0.373696719635559	Activation
GAGTTTTTGCTGTCAGAGTT	SUT672	5.49472693187631	13.5041479063797	1.60999384975367	0.204492666638877	0.374616817876262	Activation
ATTACTTTCAGCATCTTACT	YKL180W	5.20465253708177	9.70028223546848	1.60788842487844	0.204788878658363	0.374873077116606	Activation
CAGAAGAGATCAAGATGAAG	YLR059C	5.41877248041404	9.37320224043334	1.60500098204855	0.205195936066413	0.37491419777903	Activation
AAAAGAGTGTAATTGCAGTC	SUT201	4.89636053182795	7.68789833210347	1.60573323854143	0.205092615902612	0.37491419777903	Activation
GTAGACCAATGGCAGAGACG	YML025C	-3.88185771686423	6.84394128698163	1.60440285744239	0.205280376014957	0.37491419777903	Activation
GACAAAGGCGGTCGCAAAGG	YML020W	-3.94617257880292	7.44514339647381	1.60059685773175	0.205818647803006	0.375611200480677	Activation
ACAGCCAAGTCAAATTACCG	SUT686	4.22406012121031	6.45555751290769	1.59814005904951	0.206166990747319	0.375960793773438	Activation
GGCAAACCCTGATTCAGACC	YDR238C	4.30474537842602	8.87648775602112	1.59183115254987	0.207064708197748	0.377094469544272	Activation
ATAATCTGATTATCTTGAAC	YFR024C-A	3.64120408899661	7.51176127979273	1.59156153292782	0.207103176142538	0.377094469544272	Activation
AACATTATATTCTGTTTTTT	YAL015C	4.76677686453858	7.84475704297246	1.5884374218584	0.207549524759218	0.37762045551791	Activation
GAGCTTCGCTGACACGTGGG	YDR281C	4.50347229166618	12.5793898464575	1.58263264013124	0.20838189013817	0.378408976859326	Activation
GGAATAATCATCTCTGATGG	SUT738	4.4846222559906	12.4296760933277	1.58211490545625	0.208456321280721	0.378408976859326	Activation
ATCCTTTAAGAACACGTTAG	YGL127C	4.41358921894727	7.72506674457267	1.58263242012427	0.208381921760376	0.378408976859326	Activation
GACTGCTTCCTCGAAAAACG	YOR386W	4.4941644500813	8.09894373771232	1.57341098579819	0.209712346567755	0.380401064349074	Activation
AGAGTAATGGAGTTGTTTTG	SUT839	5.09427475212273	11.4395018737108	1.57145035667579	0.209996511734478	0.38048883798398	Activation
GCAAACGCTAAACCAAATGA	CUT720	4.2765251441627	8.14539633386636	1.5708881890173	0.210078074016176	0.38048883798398	Activation
GCCTAAGGTTGTAAGGAGCC	CUT283	5.364200284787	13.6086265392803	1.55972692372126	0.211705208363129	0.383146482758328	Activation
GAATTCGCATTGACGTTCGT	SUT254	4.34892813135201	7.06681933367719	1.53021507545278	0.216080168621902	0.390769415049262	Activation
GCGTATCGGACAAAGTAGAT	CUT475	4.80245924118822	12.4328153925818	1.52739826626805	0.21650333893018	0.391239643371946	Activation
ATTAATCAGTTTATTGTCTA	YEL023C	4.63108229326866	7.53056012338447	1.52445085567801	0.216947186664042	0.391746501220161	Activation
GTAATGTTGAATGATTGGGC	YDR055W	4.54596996477668	7.25860093589421	1.51837555723738	0.21786548545938	0.393005800598417	Activation
GGGTTCACAGCAACTATGAG	YGR106C	4.41405797242977	8.13535826044848	1.51767049041513	0.217972358130064	0.393005800598417	Activation
GTAGACGACTTGCCACATCC	YDL165W	4.93243791285996	9.9066707967542	1.51161816024681	0.218892335430088	0.394368009287266	Activation
GCTAATTTTTCTTGATCTAC	YDR252W	5.36772242258462	12.8076600825757	1.50877169294671	0.219326610834307	0.394515259423121	Activation
CTCCCTATAACGAATGATGC	YLR186W	4.51351275070421	7.48684373255215	1.50941650591641	0.219228143981697	0.394515259423121	Activation
CGTCGTCGTTGATACTTGGG	YER172C	4.3164515799707	9.98442219120585	1.50784888297426	0.219467621380502	0.394515259423121	Activation
CGCTAACGATCAAGATATGG	YBR128C	5.14279220730863	12.9914678753443	1.50192394622338	0.220375568533071	0.395258499134109	Activation
GACACACATGAAGTGAAATG	YDL132W	3.89893949815139	8.6860340673083	1.50371630614623	0.2201004317861	0.395258499134109	Activation
GAAAAAGACGGCTTGCCAGG	CUT730	-3.12760528987263	5.55489637101354	1.50195353406209	0.220371023308505	0.395258499134109	Activation
GTTGGGGTATAGTTCCTCGG	YAL054C	4.5931726414892	9.69890288993009	1.49844569074551	0.220910672741891	0.395922117514988	Activation
GCCGCGCCCGGGAATTACCG	CUT639	4.29300994846177	9.16974820030097	1.49170233344404	0.221952520955754	0.397492266805003	Activation
GCCAATAAAGGACTTTTCAG	SUT515	5.2353346087115	9.22100426041632	1.48298266807871	0.223308438695308	0.398729438563923	Activation
GAAGATAATAATCCATTCGT	YDR424C	4.28853659522711	8.44825472058646	1.48344404625661	0.22323644580381	0.398729438563923	Activation
AAGAATCCCTTAAATATACT	YGR112W	4.18170431803794	8.30574511141823	1.48617781519095	0.222810441663271	0.398729438563923	Activation
CGGTCATAATCTATGGAATG	YDL189W	-1.54361205442874	3.64007055705337	1.48415597402133	0.22312541199401	0.398729438563923	Activation
GAGACTAAGTTGTAAAACTG	YJR010W	4.50838002778842	13.085922342694	1.48191462645689	0.223475201349945	0.398730307170512	Activation
GCGCTCTTGATGTTAGTGAC	YPL006W	4.73173659553845	9.53801132788385	1.47912160973907	0.223912005186792	0.399178914346765	Activation
GATTGTGCAGCCCAAATGGA	YNL248C	4.03482085142463	7.56752814647934	1.47817960430006	0.224059557427334	0.399178914346765	Activation
ACTATTTCTTGTTGCAACCG	YJL029C	5.10592464449946	8.88442115998158	1.47181931624232	0.225058865833563	0.400491815594956	Activation
GTAAAAGCATACCGAAAAGG	YMR114C	-3.75277783397168	6.72953760779653	1.4703053494673	0.225297522617846	0.400491815594956	Activation
AAGGCTTTAGCTTTTTTACG	YLL001W	-3.07194583732629	6.17535324553275	1.47090552775305	0.225202876162574	0.400491815594956	Activation
GGGCTCTGTTAGGTTGAGGG	SUT311	4.37245466624175	12.4942632037062	1.46714688811559	0.225796390528052	0.401081292212051	Activation
GTCTTATTGATCGTTAACGG	CUT135	4.98844303764178	10.1009809325719	1.45838077972051	0.227187931426031	0.402956109141732	Activation
GGGTCGCATAGCTTGTAGGT	YLR280C	4.61438807996351	8.93237911145464	1.45942125503295	0.227022227567993	0.402956109141732	Activation
AGTATAAAAATAACTAAAAG	YDR211W	4.00075262332388	7.79015311867523	1.45532785194268	0.227674973856869	0.403521498380467	Activation
AGTCATTAGGACATAGGCAC	YNL035C	4.19700412850818	7.01704669865093	1.45341832546348	0.227980244326625	0.403764125476549	Activation
GGACTAGATGAAAATACATC	YDR244W	4.82318306622487	11.421337067849	1.44734800133356	0.228953965254469	0.404890566873316	Activation
AAAAAACAGTTCTATGATGA	CUT555	3.86852825455311	7.33785684762304	1.44796743978902	0.228854374181695	0.404890566873316	Activation
CTCTAGTAGTTTTGTAATAC	YMR113W	4.74999180912643	9.65094167500172	1.44440596169965	0.229427688684558	0.405315260153408	Activation
AAGAGTAATGTTGAATGATT	YDR055W	3.7160123786749	7.83817700997557	1.44375812192262	0.229532161504724	0.405315260153408	Activation
AGTATCCTGCAAGTTAGGTG	YGR108W	3.98298780015463	7.69563887120413	1.43886855280627	0.230322520958542	0.406411630065183	Activation
GCGTAAACAAGCTCGTTCCA	YER070W	4.60096961412228	9.20705456364205	1.43018830247424	0.231733709883034	0.407821723344808	Activation
GAATAATTTGGTTTCATTGG	SUT393	3.97531600238984	7.31155793281243	1.43150733707121	0.231518597751493	0.407821723344808	Activation
GTAGCTTAGCTAATTTTTCT	YPL036W	3.64070394777849	7.64077173044699	1.42872893237845	0.231971989425487	0.407821723344808	Activation
ATCTTAGTTTTTACATTTTT	YMR067C	-3.05444943990307	6.00469548898537	1.42934553439717	0.231871277302692	0.407821723344808	Activation
AGTATTTTTGAACAACGCTC	YNL101W	-2.83347859875564	5.27056381437399	1.43231611344252	0.231386819200192	0.407821723344808	Activation
GAAACTTCCCACGGCAACAG	YNL247W	5.05067458344707	9.04794378101339	1.42098628677	0.233241133329731	0.409481420388484	Activation
CGGTTGGCTGCCGAGGACGA	YGR003W	4.81926343387232	12.2216489572394	1.42088642849804	0.233257556401447	0.409481420388484	Activation
AAATTTAAGCAAATACTTTT	CUT801	4.27817771444515	7.35466137416542	1.41865856577658	0.233624322782314	0.409525676923968	Activation
GCTTACAAACGCTTTTAGCG	CUT824	4.26002203433312	12.8776615817606	1.41872057195076	0.233614105467185	0.409525676923968	Activation
CAAATGTTCAGACTAAACTT	YER067W	5.02496133572402	8.99672608616749	1.41124935385807	0.234849104094104	0.411083068273202	Activation
GACGCTTATTAATTAAATGG	YBR142W	3.22077795448003	6.1964536576001	1.41120999415974	0.234855631165257	0.411083068273202	Activation
GATATTTAGGATGGGGTGTG	SUT151	4.53194909887481	8.2191265004627	1.40760448321431	0.235454470022736	0.411830648515332	Activation
GGTAACTACATACAGTGTCG	YPL112C	4.46443752780795	11.2674657976019	1.40443580733057	0.235982281581053	0.411849889414743	Activation
GAGCTTTATAATACAATCTA	CUT007	4.1734135697148	7.35792160597468	1.40341598640236	0.236152459526802	0.411849889414743	Activation
GGCGTGACTACAAAAAGGGG	YCR010C	3.42722855720953	7.72237912991325	1.40375913509671	0.236095181572697	0.411849889414743	Activation
CTCAAAGAAGCGAAATCGCG	YOR113W	3.01316231204962	6.36818750161212	1.40503369782248	0.235882580405271	0.411849889414743	Activation
TGGAATACTTTTTACAAACT	YER174C	4.4143791055313	9.37378180250198	1.4019591899495	0.236395813679897	0.411974681107844	Activation
GAAAAACAAAGGGTATTGCC	YLR304C	4.19634422611858	8.77077401433693	1.39862194607557	0.236954438071431	0.412648324252209	Activation
GTGAAACGATGATAAATGCC	YMR010W	3.2392812405397	6.29028669607147	1.39607967587319	0.237381065025138	0.413091287322409	Activation
GCGGCCCGCCTAGACCATTG	YML073C	4.42250439418868	9.33512883735094	1.39335403576968	0.237839498970503	0.413588918441818	Activation
TTTCTTATACTGCAAAGCAG	SUT210	4.37191485701279	12.7870753898415	1.3922426624606	0.238026732493971	0.413614568493147	Activation
AGGATAAGTAAAGTAAATTG	SUT413	4.15055325559321	8.0732181687095	1.39095017919163	0.238244702658006	0.413693553203402	Activation
GAAGTAATTATCAAGGAAGG	YHR086W	3.92356923484141	8.0579311221645	1.38979119649341	0.238440364700307	0.413733715304875	Activation
AATTGCTTTTATGGGATACC	YOR371C	4.56474063326949	7.71902087059665	1.38696276866176	0.238918685623713	0.41426392489202	Activation
GGCTGCGGTTAAGGCTTATG	YER168C	4.60006178625794	9.95043626684345	1.38366693031984	0.239477521941394	0.414420738284679	Activation
GAATGCTCCGTAATGTTTGG	YBR044C	4.26951164481091	13.6873878187669	1.38435638229521	0.239360488518209	0.414420738284679	Activation
GAATGCGTAGCTGAACGCCG	YMR037C	3.96111737990935	6.81143074409944	1.38337214403802	0.2395275826783	0.414420738284679	Activation
CCTATTGGACAAGATTTACG	YGR087C	3.92439367604738	6.74720304087002	1.3816187477275	0.239825608081138	0.414637208492119	Activation
GCCTGCCGGCGCTGCGAATG	YLR096W	4.16160791185927	11.7081294175788	1.3792148364783	0.24023493450968	0.415045657747991	Activation
GCTTTTAATTGATTGAGTGG	CUT275	4.51838943993346	9.16017174987654	1.37504302411624	0.240947308577249	0.415976706960578	Activation
GTTAAGTATGAACAAATTTT	YIL151C	4.45709155202271	8.82006907168942	1.3735209504644	0.241207855715457	0.416126933817025	Activation
GAAATTTTTTATTTTCTTGC	YOR027W	4.52164409451172	9.84116956504535	1.36738994933524	0.242260833165885	0.416631322696553	Activation
AGACTGTTGAACGGTTAAGG	YPL230W	4.25391479917389	7.37211060795194	1.37014421170636	0.241787107687357	0.416631322696553	Activation
GAAAAATGGTGAATTCCCAG	YDR004W	4.25136593135731	7.48420311906184	1.36766045475407	0.242214256966987	0.416631322696553	Activation
GCGTTAACTTTCATCTGATC	YPR159W	4.19652864066891	7.39822969696723	1.36810197635273	0.242138258260908	0.416631322696553	Activation
AATGCCGATTTAAAATGTGT	YPL252C	3.41815016267027	6.19781407011897	1.36676238567479	0.24236893042606	0.416631322696553	Activation
GAAACTAAGGATACAAAAGG	YOR178C	3.57247895819453	7.99330813562638	1.36409507412924	0.242829028422493	0.417123216444941	Activation
TAAATCTGGGGTAAGCAGTT	YLR274W	-3.74490582868702	6.8845704877198	1.36298088445102	0.243021535672427	0.417155076981017	Activation
GATTAACTAGGAATTATGAC	YBR045C	4.05458397616894	11.0687458419378	1.36073968466846	0.243409328926118	0.417521867499879	Activation
GCCTGGTTAGGCTTAAGTCT	YLR043C	4.1626334527753	12.3086195487108	1.35826742277823	0.243837978142357	0.417553737883702	Activation
GGATTATTTTATTACATAGT	YOR181W	4.09011839993075	7.13960993565529	1.35789427480403	0.243902755739579	0.417553737883702	Activation
GCTAATTGGTTGGTGGGAAC	SUT260	3.49619161079894	8.239363770016	1.35661834805322	0.244124412223916	0.417553737883702	Activation
GGATGATCCTAATAGGGCAG	YML096W	-3.32448264383277	7.66313559193029	1.35695853300728	0.24406529061619	0.417553737883702	Activation
GCACAGGCAGAGGTAATCAG	YIL035C	3.59646237315414	6.92927492084701	1.35485277458537	0.244431536529157	0.417781058158887	Activation
GTTGTTAAAAAATTAAATAT	YER014W	4.63021418332919	10.5682130694946	1.35201981252424	0.244925320636274	0.418326865303265	Activation
GAACTATGTGTTCAAAAACT	SUT287	3.68869465225283	8.45260596216733	1.35027798192754	0.24522952551634	0.418548328959561	Activation
GATATTGCAGAAACTCCTGG	YDR030C	4.13605688176157	9.19785100784925	1.3485142083854	0.245538032915131	0.418776815740032	Activation
ATATAATATTTGTCTAATGG	YDR082W	3.68557545208614	6.16662326317727	1.33842823345651	0.247311342688243	0.421202130515914	Activation
GCCTAATTTTAATACAACAT	YGL058W	3.6720595016861	7.36039707201387	1.33925129750516	0.24716604655785	0.421202130515914	Activation
ATATAACAACTACTTCGTAA	SUT771	4.28246735936534	7.93215880950762	1.33233614423656	0.248390040195364	0.422307053978534	Activation
CATAAAGGCTTATAAAAGCG	YOR385W	4.08649716468664	8.26477635391033	1.33214852334904	0.248423352669603	0.422307053978534	Activation
AAAACTAACCGTGATATACG	YGR030C	3.96283950822137	10.3146486824799	1.33178209150438	0.24848842917586	0.422307053978534	Activation
AAAATGATATAATTACACAT	YGR119C	3.60480804193811	7.17810530023305	1.32943980134289	0.248904902148219	0.422416104282682	Activation
AAAATTAGAACATTATGATT	YIL023C	3.45857683531016	6.98022678785028	1.33036023248815	0.248741142169771	0.422416104282682	Activation
AAAAATTGATGCATTAGCAT	YML114C	4.7352440084479	10.2498989633126	1.32623530640817	0.249476066528921	0.423086002500957	Activation
GTGCAACTAGAAAAGGACGC	YOR360C	4.10555409647451	7.62697464725967	1.32371560448955	0.249926303000777	0.423270428433809	Activation
GTACTGTCGAAGTATTGTTT	YOR249C	3.70906576595333	7.73865595226867	1.32365114385206	0.249937834304534	0.423270428433809	Activation
GTCATATACTGGCTACATCG	YEL003W	4.23977855875204	7.6655430221521	1.3205431332308	0.250494598522551	0.423614983961267	Activation
GATATGTATATTCTTTTCGT	YLR043C	3.93112148110854	11.5388790000822	1.32100962212957	0.250410935453814	0.423614983961267	Activation
CGCACGCCATGACAAATGGG	YIL084C	3.97786549666738	8.13493855464706	1.31903386824175	0.2507655147414	0.423774280725777	Activation
GCATTCGCTCTAGTGTTCGG	YEL005C	4.05193869988047	12.9508022649736	1.31790748912931	0.250967936489154	0.423817684296473	Activation
TTGCAAAGTAGCAAAAAATT	YMR247C	4.56459977699609	11.4878467784398	1.31058564605274	0.252288648336264	0.425728289599519	Activation
ATGATAAGATTATGTAATAG	YMR283C	3.72022442071874	7.18779931998567	1.30967012200217	0.252454390246253	0.425728289599519	Activation
AGATTTCTTTATCAATTTAG	YGR215W	-2.80250075937352	5.79247918946788	1.30857526311636	0.252652773806591	0.42576342346325	Activation
GCACCATCGAGCTCAAAAAG	SUT589	3.79373033630735	9.9304646691277	1.30574074848447	0.253167266399634	0.426330832040957	Activation
GCCCGTTTGGGCTCAGCGCG	YML058W	4.24159395866337	13.855208796099	1.3042170883557	0.253444358340363	0.426497944772063	Activation
GCTATTTCATCGTGCTCACG	YER057C	4.58306464585374	12.597211727037	1.30057149327597	0.254108860176438	0.427016417470643	Activation
GAATTCATATCAAACGATAC	SUT148	4.10366323889517	13.1115252963435	1.30070215404021	0.254085006927551	0.427016417470643	Activation
AAACTAAACTTATATAACGC	YDR293C	3.94332628218814	7.90281329203809	1.29871537269893	0.254448008929322	0.427016417470643	Activation
GTATTATACAACATTATCGG	YBL078C	3.7944742674148	9.32310864296655	1.29862385237658	0.254464745857193	0.427016417470643	Activation
AATTAAATGCAAATGGTAAC	YLR208W	4.39337970116275	8.46563822945936	1.29322425820101	0.255454610127162	0.428056828183076	Activation
GAAGCCAGACAGTCAAAGGA	YDR304C	4.25872789652017	11.1766987262104	1.29378205314255	0.255352134577684	0.428056828183076	Activation
GTGCGACCCGGTGCGCCGGG	YJR120W	3.94601807889692	11.3854269260309	1.29232318827877	0.255620257697316	0.428056828183076	Activation
ATTCTCAAGTTTTTAATTTC	YDR259C	3.35044859984601	7.60424415094085	1.28476293933036	0.257015322075475	0.43009263247522	Activation
GTCGGCTCACTGAAAAACCG	YJL101C	-3.04045245162129	5.41571198085132	1.28364007471352	0.257223320519368	0.43014053180296	Activation
TATTTCTCCCTTAGGTTATC	YAL054C	4.32901121160763	7.85350403029878	1.27446334521025	0.258931026386013	0.431629352527047	Activation
CTATTATAAGTTATCATGTC	YDR189W	4.23057797768744	7.84504443027105	1.27642779453383	0.258564284493772	0.431629352527047	Activation
GCGTAATGTGTCTGGCAAGG	YBR175W	4.06617117558701	8.41525779697827	1.27402145806658	0.259013610628199	0.431629352527047	Activation
GTTTTTAGGCTCGAACGAGC	YNL234W	3.80901336827525	11.2998289306736	1.27550829473455	0.258735865370258	0.431629352527047	Activation
CACTCCACCAGCTACGAAGC	YML006C	3.26730336544411	7.74772045887722	1.27742027619992	0.258379242833568	0.431629352527047	Activation
GATAAAACTCTATACGCCAG	YPR174C	4.31527701872996	7.51032819414582	1.27070076775969	0.259635257513778	0.432064779679416	Activation
GCCTTTTTTCTTTCTCTGCC	YOR233W	3.32271617937628	7.56031792138699	1.27115178132868	0.259550717684807	0.432064779679416	Activation
GGTGCATTTTAGCGTTTCTG	CUT229	4.0235319842648	8.93394336695789	1.26550948293687	0.260610791280943	0.433387432379821	Activation
GAACGCATAGATGGATAAAG	YEL019C	3.47984269100455	5.67802356676061	1.26423379525678	0.260851209760304	0.433486625783236	Activation
GCAGGCACGCTACTAGAAGG	YHL007C	3.85677255180921	11.8551921183273	1.26200300806249	0.261272288778931	0.433885698401577	Activation
AATCTTCGATTCTTTGAAAG	CUT786	4.25123249008167	9.49444350551599	1.2480102319377	0.263932852732922	0.437918367598843	Activation
AATTATTCACCACAGCATCG	YBR056W-A	3.83946651762322	6.85448862288364	1.24731524355487	0.264065871371112	0.437918367598843	Activation
GAAATTGTAGAACGCCGCGG	YJL156C	4.19413749722406	8.19942556698409	1.24426942768123	0.264649814706566	0.438570034844026	Activation
GGTGTCGATGGATTAAGGGG	YPL154C	-2.40810844339199	4.87438727165632	1.24335933877905	0.264824608196059	0.438570034844026	Activation
GATATTTTTCGTGTTATGGG	YGL225W	3.48542662606045	6.1148315896098	1.23752675224109	0.265948241905842	0.44012690413403	Activation
TGCCTCGCAGACAATCAACG	YOR203W	4.70822891921389	9.55961488130688	1.22963182802543	0.267478650698613	0.442354347845016	Activation
AAAAAACTTTAATCAACACT	YDL046W	4.21604235443949	9.56037118047854	1.22851863608554	0.267695321612823	0.442407568041041	Activation
TGCTTCTTCTAACTTTGCAG	YOR283W	-3.72683274179329	7.98793142451634	1.22645250237786	0.268098052812536	0.442767996311612	Activation
CAGATCGGGTCGCCAATACG	YJR076C	4.24871017342847	9.38079040440314	1.22225952335051	0.268917675054436	0.443815956490391	Activation
GACAAAGCGTGTCTGATATT	YGL263W	3.52735202295488	8.78740170752751	1.22109524970519	0.269145815885776	0.443886978331562	Activation
GGTTCAGCTTTTCTATGTTC	YHR112C	4.51717094501904	9.46028462381109	1.21583067328653	0.270180438693867	0.445287073531197	Activation
CAGCATAGCTCGTCTATTGG	YBR292C	3.11041956709726	6.01701129356222	1.21450545918003	0.270441659392266	0.445411469246329	Activation
CACTGTCTCAGTCTATTGGG	YAL015C	3.67805009511929	7.74950670056403	1.21239448405865	0.270858418427502	0.445791686608888	Activation
CCACCAGGCAGTAGAAACGG	YGR185C	3.81751832485963	11.0387370229024	1.21113707292045	0.271107044383033	0.445813607721432	Activation
TATAAGGATCTTAAAAATCT	YML059C	3.62081816185464	6.31017718527035	1.21044727325719	0.271243558659537	0.445813607721432	Activation
GAATTGCATAAGTGAGCTCG	YOR357C	4.06993056987023	8.93660341407138	1.20133362682097	0.273055292114861	0.448288869863881	Activation
GGAATAACCTCAGAACTCAC	YML001W	3.71490849901429	7.82016186967286	1.20099223622821	0.273123452406643	0.448288869863881	Activation
AACTGTATCGTCGGCGACGG	YLR375W	4.71781263119209	10.1272716899371	1.19819724406301	0.273682289035429	0.448411736268477	Activation
TGGCTCCCGAGCTAGATGAG	SUT593	4.27284090776056	11.4082327257869	1.19834243056744	0.273653224859575	0.448411736268477	Activation
ATGCTATTCTTGTAAAAGTT	YPR032W	4.02809967158183	7.98921714017169	1.1978126793719	0.273759291866994	0.448411736268477	Activation
GCACATTGGCATTAGCTAGG	YBR094W	3.98178356673389	8.63224222958895	1.19043479667373	0.275241870195917	0.450532426436729	Activation
GTCATGTACGTCTTATACGG	CUT917	3.19473786053558	6.31882463004632	1.18931602303325	0.275467565961626	0.450594285931773	Activation
GAACTGTGTTTACCTAGAGT	SUT149	3.92979875437284	10.7705369401522	1.18517154526459	0.276305680916194	0.451657138948216	Activation
AGACCATCGTCTTAAAGAGG	YNL321W	3.53695969362288	9.23726617022925	1.18300918543032	0.276744235600494	0.452065856246584	Activation
GGCATTCGTCTTGTTTCTCG	CUT476	4.18928324874611	10.3544888509935	1.17806813390618	0.277749636256191	0.453221764717822	Activation
GATGATACTAGTCGCAGTCG	YNR017W	3.1967392434305	7.64648174769037	1.17767486423388	0.277829855769474	0.453221764717822	Activation
ATTTTTAATATGATCTATTC	YLR454W	-2.31198573661158	4.79254107101488	1.17273947271595	0.278839066833703	0.454558859461061	Activation
GGGGAAGACATTGACAGATG	YPR189W	4.16445945995986	9.82541026475047	1.17057266684723	0.279283604143194	0.454772255128535	Activation
CGACGCGTCATTAACTAGTG	YNL206C	2.75548122065	5.17492486927009	1.17025299653559	0.279349262637336	0.454772255128535	Activation
ACCCGGAAGACGCTTTGTGT	YDL088C	4.04377724600807	7.70671995212144	1.16607940891946	0.280208283282263	0.455861236981591	Activation
AAAATAAAATGAAATAATAC	YCR086W	3.93236181404627	8.91024915327268	1.16278504562263	0.280888694468331	0.456658365650887	Activation
GCCCCTTTTACCTTGAGCGT	YGL161C	4.05678472167271	9.59489991370442	1.16089638607199	0.281279715415084	0.456684639627689	Activation
CATGTTCCGGACTACTTGGG	SUT407	3.91171157500391	7.79547239498859	1.15936293761237	0.281597700742776	0.456684639627689	Activation
CCAACAGATACATGGGCGTG	YHR144C	3.49211466933501	9.56622982496493	1.15903081600974	0.281666631363366	0.456684639627689	Activation
TCATCTCAACAGAAAAATCT	SUT415	2.93636989067825	5.50970708804168	1.16007996802458	0.281448956387224	0.456684639627689	Activation
GAAGTGAGCAACACAGGAGT	CUT246	4.05210018383462	8.25762334764398	1.15599639526588	0.282297402966175	0.4573980894006	Activation
CTGATTACTCGCATCGTTTC	YDR519W	4.38488072558652	8.72842061261703	1.15454843902635	0.282599022267507	0.457577620119839	Activation
GAAAACTTAAAATGTAAAAG	SUT069	3.43110103386259	9.15365735112776	1.1499237186258	0.283565118548579	0.458522693377945	Activation
GGAAAAGCGCGTAAATGATG	YBR208C	3.20698456275423	7.66934205558369	1.15013570953794	0.28352074266637	0.458522693377945	Activation
GATATTATACATAAAGTTTG	YNL267W	4.15282273396622	10.757185978067	1.14357230880614	0.284898744240794	0.460368725531958	Activation
GAGTTAGGACTCCAATTGAG	YMR293C	3.79857856749266	9.88245516480908	1.14192818589312	0.285245260553256	0.46061827259711	Activation
GTATTTTTAGCGCTTCTCGC	YLR414C	3.68890986068001	10.6287298423084	1.13811340489247	0.286051327759851	0.461609074002775	Activation
ACTAAAATCTCTCATATGTT	YDR415C	-2.76918345344706	5.1754234454952	1.13569212415539	0.286564447104234	0.462126122498959	Activation
GAGATTAAGATATTATATAC	YMR097C	3.739820662378	12.7241428576168	1.13459485082558	0.286797366824384	0.462190917772092	Activation
GTACTCTTCTACCCAGGTCC	YDL161W	3.90403049266639	9.01607717109844	1.13141680113314	0.287473334333808	0.46296914421254	Activation
CGCAATCTATGGCACTGGCG	YOR085W	4.40080802430051	9.27561572317874	1.12964604331183	0.287850851069514	0.463266000580332	Activation
GATAATTTCTTTGGAGAACG	YMR054W	3.44156221759115	7.22097680616564	1.12633093306522	0.288559312766313	0.464094723013828	Activation
GTGGATATTGCGGTACACAG	SUT525	3.48620046932001	8.15360361873332	1.12461484304653	0.288926924485996	0.464127858650441	Activation
AGCCTCCTGATAAACGTATC	YMR129W	3.42485329719383	9.63682479284144	1.12442787756081	0.288967011244833	0.464127858650441	Activation
AAAAGAAATAGCCAATATGT	YJR080C	3.86757997723829	7.85972330972312	1.12223577129434	0.289437543439251	0.464298043896971	Activation
AAGATTGACGTCAATGAACG	CUT773	2.98964639724696	7.9390879010693	1.12213030278571	0.289460206683057	0.464298043896971	Activation
GCTCAATAAAGAAGAAGAGG	CUT719	3.72619127953587	8.52493741174639	1.11363977460523	0.291292108706436	0.466924115426493	Activation
GGTGACAGGCGGTAGATGGA	YKR024C	3.93374999976649	9.04163465212645	1.10749158754444	0.292627872401236	0.46875192920385	Activation
GTCTGCAGTGACCTTGAGCG	YHR069C-A	3.78457707944257	10.3013590581133	1.10343991907502	0.293512423392836	0.469855000865168	Activation
GTCGTTAGACTAGCCCCATG	YBR034C	3.13072671979711	8.35873932402767	1.09992801092	0.294281903439727	0.470772517977629	Activation
GGGCTGGATAGAGGGAAAGG	YNL015W	3.3106934945125	7.5476181583039	1.09890157470213	0.294507289152095	0.470818986257816	Activation
GTTCTAGGACTTTCTGACGG	YHR211W	3.37235878322701	7.20123471650771	1.09664252151285	0.295004112948701	0.471242906899115	Activation
GGGTAGGTAATCTGAATTCG	YMR103C	-2.99663939689793	6.48255726294261	1.0959097875781	0.295165490476426	0.471242906899115	Activation
GTCTAGTCGACATGTTTGCT	YOL045W	3.75479838609568	10.7447227038365	1.09476962859313	0.295416824393425	0.471330369191906	Activation
GACCTTTCAGGGAATACAAT	YMR236W	3.4804892835926	8.12026764513954	1.09355155816394	0.29568563599782	0.471445581863545	Activation
GGGAGACGACCATGACCGAG	YPL249C-A	3.9468053317943	8.39374370605474	1.08856528253089	0.296789314597014	0.472890881331322	Activation
GAGCTAATTAAGGCGAAAAA	YJL115W	3.96778098754724	10.3052265244658	1.08621000796765	0.297312476749966	0.472901285313282	Activation
TTTTCTTAATCTTTTCGTTC	YKR056W	3.61776243414688	10.1478133260463	1.08732302897312	0.297065101081639	0.472901285313282	Activation
AACTTTATAGTTTCTAGGGT	CUT206	-2.52298534986419	4.93634510034825	1.08587285231765	0.297387463825033	0.472901285313282	Activation
GATAACGATTCCATTGCCAC	SUT097	3.44457191682445	6.62214679113704	1.08466584274175	0.297656115036909	0.473014820317102	Activation
GTTTAATTAATAGAAATAAT	YNR016C	3.7931751198867	7.88874425511877	1.08063319090816	0.298555950060568	0.473190461497186	Activation
CGGATAAAACTTCCTTAACG	YLR226W	3.73430259679611	9.38534706990315	1.08113409473086	0.298443989762788	0.473190461497186	Activation
AATTTTTTCAGCGAGAGAGC	YHR005C-A	3.64184821153687	8.39331932043135	1.08148098113094	0.298366486537074	0.473190461497186	Activation
AAGATCCACAATACTTTTCG	YMR209C	-2.89387355965535	6.69321636680455	1.08135575407933	0.298394462454411	0.473190461497186	Activation
ATAACATAGTTATATTTACT	YKR094C	3.50123389725566	9.89485121823967	1.07873840081277	0.29897995583795	0.473549494121139	Activation
AATCATTCAATTTAGGAGTC	YNR040W	3.07014657170569	7.06896500482675	1.07768406612057	0.299216224471427	0.473610895235962	Activation
GCCTTATAAAGGGGCCAATG	YBR269C	2.97487548949823	6.71711842560807	1.07065795422489	0.300796876826341	0.475798753713434	Activation
GAACATCTGCTATCCTTGAG	YBR246W	3.17286488729586	7.07678848941627	1.06481314107645	0.302119980481695	0.477576607247926	Activation
AAAATCAAGCTTTAAAATAG	YDR339C	-2.65022486524782	5.0743375326515	1.06039278699549	0.303125616456034	0.47885061150301	Activation
AGTTTCAATGACTCAAGCAG	YBL055C	3.28518416234257	7.6030819781887	1.0538535702426	0.304621241395316	0.480896469299518	Activation
GAAGTGGTGTAGTAGTGATG	YLL010C	3.16376055575431	8.13642884463628	1.04674751522155	0.30625735424824	0.483161273346894	Activation
TAGCCTAGCCTACGAGTTGT	YGL091C	3.35931057523147	9.6586851260005	1.04476090244424	0.306716791218623	0.483375577984953	Activation
CATCAGTAAAATTCAAATTG	CUT234	3.10868273130766	5.62987670946941	1.04354721116572	0.306997917127224	0.483375577984953	Activation
GGAAACTTAAAATAGCTCCG	YDR011W	2.65290987990326	6.04377925290498	1.0435776388034	0.306990865125917	0.483375577984953	Activation
GAAGGCTGCTTAAGTGGAAG	SUT004	3.06741986588497	8.05385277207417	1.04193127970268	0.307372732383632	0.48364817077162	Activation
GCCCTAATACTGGCCTAACG	YMR221C	3.27650530313071	9.28801464643025	1.0367289664604	0.308583449929523	0.485234828151473	Activation
AAAAATACGAAACCAAAAAG	YHL007C	3.566386740559	9.3265696215232	1.03097700585344	0.309929307530034	0.487031768975768	Activation
GCCTGAAAACCCAACCATTG	YMR013C	3.76610773452976	7.74321661234353	1.02945340157786	0.310287082490685	0.48713897873929	Activation
GGTACCGGTGACATACGATG	YNL205C	3.37424163183873	8.30188262895914	1.02895676461068	0.310403819647054	0.48713897873929	Activation
GGGAATAAGACAGCATGGAG	YML088W	2.78726518687878	5.8069702780696	1.02643193234601	0.310998179939401	0.487752541199924	Activation
GCACTTAAACAAGCATATTC	SUT063	2.89523501946937	6.196072896388	1.02540384042808	0.311240623413914	0.487813735259194	Activation
GGTATTGAAGGAAATAGACG	YHR028C	3.94516156480999	8.47723777229399	1.02224140723179	0.31198793044794	0.488028086897692	Activation
GGGTTACGTGGAAAGCAGAG	YJL012C	2.78096040038455	7.60807887603116	1.02238261391656	0.311954512378345	0.488028086897692	Activation
GAAGGATCCCCACCTATGGG	SUT088	-2.86225171806342	7.78413834885033	1.02302281947655	0.311803059427238	0.488028086897692	Activation
AACTGTTTTTTCTGATTACT	CUT534	3.76382180308495	8.24283950362286	1.01930958905508	0.312682832548268	0.488477806156838	Activation
AAAACTATTGTGGAACATGG	CUT369	3.5378407323648	7.74154070233394	1.01934538365312	0.312674336312866	0.488477806156838	Activation
GAAAGTAATGACAAAGTCTT	SUT651	3.59936336872329	10.3273770279902	1.01701626420282	0.31322780666046	0.488826114051931	Activation
GTTTTTTGCATCATAAAGGG	YAL001C	3.37628777169759	8.15270116796509	1.01665619147828	0.313313485111684	0.488826114051931	Activation
ATATATATTTGATAAGTCTC	YEL018W	3.67021682000691	9.76179181126922	1.01094712766635	0.314676043430775	0.490632738717164	Activation
GAAGAATTACTGAAATGAAG	YCR019W	2.61754265144666	6.79565933817154	1.01005431771188	0.314889826522164	0.49064704613395	Activation
GGGGTCCTTCCTGAGGAAAG	YOL038W	3.40005877558059	7.80141207986634	0.999269202055927	0.317487404208663	0.494298332641869	Activation
GGGAGGCAAAGGTATCATGC	YPL143W	3.04694558981693	5.72484725562732	0.998616832184351	0.317645425605138	0.494298332641869	Activation
GGCAACGAGATCCAATTGCG	YIR007W	3.49642486514389	7.41229882865123	0.995930709495183	0.318297164532341	0.494991310342771	Activation
GTTCAGCAACTCCATGATGT	SUT829	3.30473929436803	6.84841390218108	0.994387349797854	0.318672426891391	0.495253713341255	Activation
AAACTTACGTACTTTTATAC	YPL270W	3.34573918549932	8.5076709331155	0.988071960474694	0.320214061181845	0.497327278959886	Activation
AGCATGTTGAGGTGTGTGGG	CUT800	3.75401040137534	10.5513594340466	0.985692379655278	0.320797478464554	0.497910908322331	Activation
GCTCTGATTTTGGGAACGCC	YIL126W	3.9229060215902	10.2631460247039	0.975606616945478	0.323285873969579	0.498178160650856	Activation
ACCTTATCTAGTGCCCAACC	YGL055W	3.8468445087601	8.71357235421326	0.975685594688704	0.323266289592254	0.498178160650856	Activation
TGACAATGTCATCGCAATTG	YIR014W	3.79591478081481	8.54878211206961	0.973544584539594	0.323797757906546	0.498178160650856	Activation
AAATTTTTGAAGTACTGGCC	SUT790	3.71921857423081	10.276659410167	0.973230595930208	0.32387579707441	0.498178160650856	Activation
TATCCACGGAAGATATGATG	YMR225C	3.61944616643707	7.93467900306372	0.980831691581704	0.321993561139951	0.498178160650856	Activation
GCTGGTATCATGGCTTTGAT	YGL254W	3.56030390564783	7.96492912362252	0.975448807316432	0.323325011246825	0.498178160650856	Activation
GTAACATGTTGATCTTGGAG	CUT506	3.49938156404582	8.76480741388058	0.979089724280758	0.322423641938647	0.498178160650856	Activation
GCGATAAAACGCTGACTTTT	YMR210W	3.32568270965866	7.83361740886772	0.979389225602596	0.322349643048624	0.498178160650856	Activation
GGAAACTGTAACTAGAGAGC	YGL157W	3.26861622557994	11.971524838187	0.978058811057224	0.322678524784686	0.498178160650856	Activation
GGGAAGAAAACTGCTCAGGG	CUT449	3.22464676922545	8.96837269482967	0.98264225903919	0.321547344442432	0.498178160650856	Activation
ATATATTTTTATCTACTGTG	CUT061	3.20491768873142	8.07379125375512	0.983197288155485	0.321410719973169	0.498178160650856	Activation
GCTAAGGGAGACTTTCGACG	CUT604	3.11808334067602	7.75265254833217	0.975763654744496	0.323246934315729	0.498178160650856	Activation
GGACACATTGAGGATTTGAC	YEL046C	2.91728408947639	6.59197472699238	0.97322121651298	0.323878128629977	0.498178160650856	Activation
GGGTGCATGACTGATTGGTC	YFL021W	-2.66255804583413	5.74735804831982	0.978506149335868	0.322567892303065	0.498178160650856	Activation
GTCTTACATGTCTTTGTATT	YOR232W	-1.62093652915201	4.33093992774307	0.972385215783496	0.324086032564668	0.498178401339792	Activation
ATTCTTAGAATTCAGTTTAT	YIL073C	3.42627151005095	9.25822285262164	0.970477687137917	0.324561074005438	0.498269817839334	Activation
GATGAAAACAATCCATTTGG	YCR028C-A	3.27447908534466	8.45667834230047	0.970930444923963	0.324448238217724	0.498269817839334	Activation
GTTGAATTTGAAATTCGCGG	SUT743	3.06597577778859	7.71897182976114	0.968566215067213	0.325038021186182	0.498682773387373	Activation
GGACCCTTGTAAAGAAATAG	YLR079W	3.67662801377036	9.85144568144634	0.964914130687595	0.325951863794826	0.499722059598819	Activation
AAGAATGATTGAATACTTGG	SUT343	3.46793716379446	7.32243965920435	0.964195022358698	0.326132203199396	0.499722059598819	Activation
CAAATATGGGTTGTTGTTAC	YAL051W	-2.27295808740656	4.71408616404906	0.962018690301021	0.326678793758919	0.500239940890094	Activation
GCTGGTTAGCAGTGGCAACG	SUT192	3.02575053455158	7.61296358787045	0.960954900719948	0.326946408457835	0.500330240894631	Activation
TGACATTCACGTCAGAAAAG	YHR139C	3.28452755097136	6.83275268211055	0.957814968329751	0.327738009590418	0.501221777422081	Activation
GGTGTGTTCGCATTTAACAC	YHR021C	3.47034997690445	9.34249181084563	0.955367348134674	0.328356837588236	0.501848117614142	Activation
ATTGAGTGTGATTAATTTTT	YMR118C	3.18536692935751	8.79759645077695	0.952792210745519	0.329009581041257	0.502525461998048	Activation
GCTGTTTCGATACATGAGCG	YHR067W	3.55708864316001	8.9207272793966	0.949900964419789	0.329744507246545	0.503327389164363	Activation
GAAAAACCGGTCGAACCAGC	SUT127	2.98359282660707	6.86342848388875	0.948751477272821	0.33003730174758	0.503453848340139	Activation
GCCTTGAATTGGCGTTACGG	YLR378C	3.28329677108756	10.7063792083896	0.94580419403502	0.330789608114315	0.504280661321124	Activation
GAACAGTATGTTAAAGATAC	YLL035W	3.33757842048128	10.3529458339243	0.942721788012445	0.331578849047729	0.505162693784279	Activation
GATCCATATACATTACTTCG	YGL082W	2.5161733467363	5.99595522765046	0.940345929351649	0.332188893359744	0.505449851698393	Activation
GAGACATTTGAAATTATACT	YGR186W	-1.68698811744485	4.55597365553182	0.940969838864346	0.332028548674123	0.505449851698393	Activation
AGCATTATTCTCGTCAGAGA	YDR079C-A	-3.12006007257841	7.95922427111492	0.93845866037866	0.332674550240577	0.505867832261828	Activation
ATAAAGGCATCATCCATGCT	CUT523	3.64400209651524	10.3583515182177	0.935166649374374	0.333523963444499	0.506801177595536	Activation
ACGTGGGGTACTTTAAAGTG	YFL054C	3.52171026032655	8.60451821572959	0.933626398527077	0.333922377231421	0.506801177595536	Activation
GTTTGATGGAAAACATATGC	YMR054W	3.39168683508831	7.21405810284728	0.933956189958552	0.333837017247753	0.506801177595536	Activation
AGGAATGGGAGTAACAAGGG	YJL106W	3.72377108315957	9.57432833018988	0.927695119331164	0.33546256393042	0.508816716195539	Activation
ATATATCTTTGACGTATTTG	YLR306W	3.24665474322872	6.89242391767133	0.926565473356384	0.335756977817371	0.50894136081293	Activation
GTTCAAATGACGTTCTCGCG	YPR013C	3.63332750937056	10.3772702877511	0.924700878389828	0.336243694835751	0.509357157432805	Activation
GAGAAATAAAAAGGAAAAGT	SUT777	3.21699660152378	7.7135064470889	0.922730409660465	0.336759075685664	0.50981582291302	Activation
GGCCTAAAAAGCATAATAGG	YGL178W	-2.21197429835009	4.66426533379815	0.921607648569156	0.337053210025892	0.509939178323085	Activation
GCACACAAGAGATCAGAAGG	YGR280C	3.28715660659426	9.12480565261589	0.920638837866125	0.337307290201501	0.510001817089029	Activation
GAAAGTAACGGAATAAGCGA	YLR049C	3.14301572548917	6.44204513130022	0.916548177269408	0.338382943445732	0.510691851644837	Activation
ATTTCTTTACAACGTTTTTG	YKR090W	2.59966814250405	6.91070049272617	0.916473717299747	0.33840256558117	0.510691851644837	Activation
GTACCCGGAGAGTACTTGGG	YBR256C	-2.37202470691987	6.00203146979317	0.917682302987741	0.338084260583245	0.510691851644837	Activation
GTCACTAAAACTGAACTCTG	CUT256	3.10799420617881	7.44594853825563	0.9143774834088	0.338955605230241	0.511173298681719	Activation
CGCAATACTAGAATCGATCG	CUT161	3.04136695976509	8.01146545286728	0.913649602913124	0.339147922519856	0.511173298681719	Activation
GTAAATAAAAAAGTTCTACG	YNL123W	2.88859382096558	5.4273720913491	0.908957787945258	0.340391099533136	0.512724784347022	Activation
ACGCAGGCCTTACAATAGCG	CUT326	3.10268195225811	9.98286903209986	0.904854918866505	0.341483255875216	0.513815556021437	Activation
ACAAAGCGTGCCCGGATGCG	CUT782	-1.35635932401032	3.96213340945177	0.904628048223869	0.341543784945025	0.513815556021437	Activation
AAAAAAGAGAGAAAAATAAG	YOR317W	2.90984222775043	5.87850686342042	0.902576505193958	0.342091793613013	0.514317317294047	Activation
GAAGTATGTTTCTATATAAC	YHR170W	2.89419622495471	7.00556796326258	0.900510678320229	0.342644816433758	0.514825983589067	Activation
GCTTCAGATTCATTGTTGAC	YGR047C	3.31958953426213	7.45503799131803	0.899606596213023	0.342887219056148	0.514867596303471	Activation
CCACGTTCACAACCGCGCCG	CUT765	3.53361647738415	8.71524861042799	0.897673747259357	0.343406231715956	0.515324245090652	Activation
CACTAGGCGTTCATAATACG	YNL096C	3.24723017643689	7.20128165974822	0.894893548610687	0.344154638782499	0.516124342589389	Activation
CTTTCAGTAGAACAAAAATC	YNL283C	2.90797302159791	5.92013228339935	0.893041142042767	0.344654515738293	0.516228312767287	Activation
AGATCAACTGAAATTTAAAC	SUT112	2.85678008447012	7.351606473588	0.893231018559813	0.34460323190603	0.516228312767287	Activation
GTAACATAATTACTAAAAGG	YML043C	2.93775597898933	9.29751204209948	0.883947087439946	0.347122878228183	0.519551002304297	Activation
AAAAATTGTATTCCGTGCTG	SUT430	-2.8788351062068	7.22155002290831	0.883275198480261	0.347306195451955	0.519551002304297	Activation
AGTAGTAAATATCAGAAGAT	YDR468C	3.41964258033952	8.09572796534939	0.880767362837792	0.347991591063894	0.520251767687792	Activation
GTTCGCAACAGTTAATAGTG	YDL128W	3.31326938173683	8.36122731694562	0.875849185845388	0.349341079906526	0.521294281030398	Activation
AATAGGTACAATATTGTTGT	YNR020C	3.08261586591251	7.77704605502807	0.876589121422828	0.349137596476252	0.521294281030398	Activation
GCATACGCCAAGACAAACCG	CUT387	3.02155907424118	10.4516366495727	0.87650674360242	0.34916024253153	0.521294281030398	Activation
GACTTTAAAAAAGACATTGA	YMR268C	3.18425659792631	8.78520422659923	0.873001314391013	0.350125755848486	0.521815762911541	Activation
GAGAAAAGGCCAAAATTAAC	CUT481	3.10872544054636	7.62918715035915	0.87346312415495	0.349998350300285	0.521815762911541	Activation
ATAAAAGAAGAAACGATAGC	YDR076W	2.90976771141339	6.18064361904554	0.872097903554247	0.350375174303094	0.521863147812931	Activation
GGCCAATGCTGCTGGTGCCA	YGR284C	-2.41952346131843	6.36949530575924	0.869190351259287	0.351179551166465	0.522736538607811	Activation
AGAAATTCTAAAACACACTT	YLR183C	3.08002905146928	7.49235113022005	0.866765724899907	0.351852251553272	0.523412964779619	Activation
AAATTTTTATCTGAATAAGC	YGR271W	2.6159864064628	7.58092681086935	0.864821666525274	0.352392890801374	0.523892220794603	Activation
TAAGAAAGACGATAATGTGA	SUT391	2.87894622174689	7.03459363406142	0.863657584839766	0.352717162636671	0.524049415119415	Activation
CTGTCTTTGAGGCCAAAATG	YHR114W	3.27726574581815	7.7829439198528	0.862162666830307	0.353134191561499	0.524344143259737	Activation
GGGATCGGGCATACTTTACG	CUT884	2.80577935708867	8.82171428380681	0.857362083471909	0.354477948146643	0.525688385686858	Activation
GAAAAAGGTTACATACAATA	YKL214C	-2.06560665427205	4.53082196866371	0.857920333057465	0.354321326695507	0.525688385686858	Activation
GGAAAACTCAACGAGTGTTG	YGL224C	-2.32864233350299	6.09121017698841	0.855120293049457	0.355107855640275	0.526297056752397	Activation
GGGGGTAGAGTGTTGCGGTG	YHR200W	3.06947955554173	8.47422288237822	0.851228716782252	0.356204972020246	0.527596987587739	Activation
GTAAAAATGTGGACAGCACG	SUT838	2.75202556692936	7.21844533311583	0.849267451352124	0.35675965483815	0.528092377964126	Activation
GATTGTGGAGATGTAGTCGT	YFL037W	3.5015884736422	12.0009281070077	0.847175400896989	0.357352633147632	0.528643808937706	Activation
AAACATGTTCCCTAATGGTG	YDR440W	3.22933130030556	10.0467058003694	0.845227063165481	0.357906094560232	0.529136137333808	Activation
GATTATTTTAGCAATATTAT	YGR014W	3.3800229254327	8.32673968501657	0.844023392409076	0.358248608114438	0.529316181305251	Activation
GCCATCAAAACGATATTCGT	YAL038W	2.99407846778171	7.52986850779874	0.84169977888996	0.358911085332189	0.529373811733127	Activation
GAGTAACTGTCTTAGATTTG	SUT147	2.61349725265867	6.94824265333553	0.842738773795196	0.358614653157413	0.529373811733127	Activation
CAGCTCCTCCCCTAAAACCG	YDL110C	-2.54896597969956	7.04150785640874	0.841563882663737	0.358949882351153	0.529373811733127	Activation
GGCCCACAACATCAATGTCG	CUT143	3.41502511133333	10.4718092823413	0.834816650925154	0.360883431690487	0.531898260106815	Activation
AGCTTGTTTTTGACTTTGGT	SUT840	2.33588734137521	6.00348811525195	0.833604734158342	0.361232249366806	0.532085340283539	Activation
ATCTTTTCTTGTCCTTTTTT	snR11	2.98853774007021	8.16627516808398	0.832133847784994	0.361656229564215	0.532382835171877	Activation
CATCACCATATTTTGATTCG	YPR141C	3.211441028026	7.7528522464566	0.826170666134764	0.363382163178579	0.534595354173148	Activation
CGCAGAATCCAACTGGAATG	YGR278W	3.22993963554722	7.82133353210911	0.822536198653592	0.364439683016707	0.535166172611185	Activation
GCATGTGATTGATTTTGAGG	CUT718	3.11678167162658	10.4494705399791	0.823548149187364	0.364144808661698	0.535166172611185	Activation
GCGCCCGTTTCCCAATAGGG	YMR251W-A	2.94055636790312	10.5831124140521	0.822553520162558	0.364434632885685	0.535166172611185	Activation
AGGCTTCCAGGGTCGCAGAG	YJL062W-A	3.25107068899935	8.87780959168677	0.814111004165003	0.366907615616023	0.53776139494402	Activation
GTAACCGTGAACCAATGGGG	YOL097W-A	3.17308634566727	7.74698291532107	0.813478926873174	0.367093699789339	0.53776139494402	Activation
GGGTAAGCGATCGCAGTGAG	YDR032C	-2.53792837515162	7.32057823618555	0.813443936546571	0.367104004805405	0.53776139494402	Activation
AATTCTTTTCTTATCTGTTC	YGL184C	-2.45031163419073	7.26286454912802	0.814607696322699	0.366761480883825	0.53776139494402	Activation
CGGCTTCAGCCTTAAAATTG	YMR312W	2.81025099821322	9.46307669520898	0.810757646413464	0.36789634708595	0.538593064903606	Activation
ACGACATTATTCGCGATTTG	YBR089C-A	3.26342497285491	8.15142722630728	0.808388864631887	0.368597012449381	0.538670316559213	Activation
AAAATTTTCCTTGGGACGAT	CUT058	2.92336665943863	6.81745845905634	0.808182023558875	0.368658282398036	0.538670316559213	Activation
AATAAACAATATCATAAAAC	CUT532	2.85820951605342	7.27731961848906	0.807543047247509	0.368847647952555	0.538670316559213	Activation
AAGCAGCCTGGTGTACAGAC	YPR093C	-2.29081758100589	6.35781248530859	0.808877291709856	0.368452388034756	0.538670316559213	Activation
GTAGACTTTTGAGATGTATT	YGL232W	3.38891957643229	8.78403219901415	0.795100046639047	0.37256242484956	0.54370887932873	Activation
GGCACGCTGAAAATTGATGG	YLR346C	2.82452926600992	7.42270794106737	0.79371900884261	0.372977942658783	0.54370887932873	Activation
GCGAGTGCTCTTATATAAGT	SUT496	2.495665084204	7.34869529404712	0.794291481275993	0.372805622168009	0.54370887932873	Activation
GGGTGTCTTATGGATAAGTG	YMR041C	2.82102624136302	8.29550473586135	0.781433145058042	0.376703191183143	0.548805742683583	Activation
GTTTGAAATGTAAGGGACTG	YER053C-A	3.08125031522908	7.70220309726352	0.780359481143021	0.37703122022927	0.548950131214201	Activation
CTTTTCTGGTGACTAATCGG	YGL150C	3.11952081287396	11.5399729511702	0.778295722986094	0.377662875558784	0.549095236745661	Activation
AGAAGGAATTCTCAAAGGAG	YIL018W	2.92803320354791	7.95743483787024	0.777790215878116	0.377817823448849	0.549095236745661	Activation
CCTCTTTTCGAGCCAGACGG	CUT516	2.63537333553241	7.34499058456208	0.779008286935258	0.37744461257197	0.549095236745661	Activation
AGACACTACAACCCCTGTTG	YIL002W-A	2.30273051435026	6.93229865140042	0.775729589335085	0.37845037343514	0.549681402481808	Activation
AAAATCTCTCCAGATCAAAC	YCR035C	2.57982543428089	6.5280433751784	0.773885397165392	0.379017750996074	0.549839423405072	Activation
GCTAGCAATTGTGGAAGACG	SUT261	2.13592884609383	4.57822323060263	0.77405742126466	0.378964775974235	0.549839423405072	Activation
GGAAGCGAATAAAGACGCAC	YIL035C	2.42507906387985	5.87996686715268	0.772819255954742	0.379346303528315	0.549983334861487	Activation
GCTATTGTTCTTCTCATCGC	YLL027W	2.50931954906049	5.30075407540759	0.763782145573184	0.382147495478614	0.553375419177365	Activation
GCATCATTGATGGCTGCAGG	YBL050W	-2.41575006351351	7.24500156108133	0.764060663944909	0.382060728164988	0.553375419177365	Activation
GGGAGGTCAATTCTGGGCAG	YNR043W	3.0399522681924	9.37332084630504	0.7621485876116	0.382656962977699	0.553778755111962	Activation
GCTAAATAAGTGTTAACTTT	YPR109W	2.92678389985831	10.058434636487	0.758996908774417	0.383642619870979	0.554594782293329	Activation
AGATAATGTATCTTTTATTG	YPR007C	2.72627008189245	7.74230939014509	0.758129092348364	0.3839146532973	0.554594782293329	Activation
TGGTTTCTACCACGCAATCG	YKR068C	2.55034674273068	6.54504615931759	0.758394237025518	0.383831509663166	0.554594782293329	Activation
GAATTTCTTGTACAATCTAG	SUT245	2.97048170576308	8.46774747308928	0.756314507513142	0.384484354709723	0.554749387842308	Activation
ACTCATTACTTAATACATAC	SUT419	-1.89578108444479	4.39059017842749	0.756494867143645	0.38442767584961	0.554749387842308	Activation
GCTTGAAAGTTTGAAGAGGG	YGR127W	2.66435808676625	8.3885056651643	0.751315401273078	0.386060086257611	0.556687965631841	Activation
GCTTTCAAAACACTGATGAT	YKL132C	2.75994890835896	6.50468892614858	0.749965444464624	0.386487171478139	0.556968892550827	Activation
GTCTTGAACAATTCCGGTTG	CUT912	-2.4624400799941	6.82996695033525	0.748303348035014	0.387013933018321	0.557393039866627	Activation
ACTACACACAGTTGTAACTG	YOL071W	3.12337027550235	9.04303527779602	0.743610619699693	0.38850671708163	0.559146533695179	Activation
ATATGTACATATGGATATTG	YPL149W	2.6556673409958	7.41752198353815	0.743011856447207	0.388697778010786	0.559146533695179	Activation
AATTTCTCATGCCAGCAGGG	YJR036C	2.72395440869325	8.81806897905607	0.740026483927879	0.389652394500948	0.560183718233378	Activation
CAATCTAGTTGTATCCAACG	YBR133C	3.12826121192954	9.63597705647375	0.738670168494862	0.390087203826112	0.560472806935301	Activation
GAAAGAATTACTCAAGTCAG	YIL063C	2.6425974795617	7.75693721286351	0.737193639669319	0.390561341064746	0.560818021480995	Activation
GAATGCCGGTATTTGGAAAG	CUT710	3.04012114328497	8.00334512307534	0.735885341710419	0.390982146426121	0.561086287929286	Activation
GAATTAGCAGATGGCTGGTG	YKL022C	-2.70596705775447	8.1636678015671	0.734540538267358	0.391415370838673	0.561372045018622	Activation
GCTGACCAATGAATATTGTG	snR87	3.1253155380148	8.17115165474655	0.73082451256617	0.392616062380368	0.562757512007246	Activation
TTCTTTTGAACCGGATGATG	CUT195	3.01258943273231	7.84211523279414	0.72775398444255	0.393612179701275	0.563511645924572	Activation
GATAGTACACTTTAAGCATG	YNL029C	2.6182501719486	7.01310081525012	0.728057586894195	0.393513525627095	0.563511645924572	Activation
GGATTAGTGAAGCGCCAGCG	YHR203C	2.95219141852941	10.3884188192289	0.724722854210883	0.39459908339693	0.564544111935083	Activation
ATAAGTAAGCCTTTAAGGAT	SUT597	2.63937542330429	7.77228405384466	0.723875481162693	0.394875615899684	0.564544111935083	Activation
AACAACACGTCATTGTAACG	YDR109C	2.58413910199092	5.90196396893089	0.723373316101345	0.395039624615125	0.564544111935083	Activation
GGTGGTATTTAACGAGAAGG	YJR085C	2.69869650346825	6.61521925690571	0.721556992447224	0.395633661865435	0.564590625535377	Activation
GAAATCCAGAATCCAAAGTG	CUT858	2.64942414106515	7.67914682758525	0.721114734282796	0.395778499384891	0.564590625535377	Activation
GTTCATGTTCTTATGTTCAT	CUT343	2.58657631013616	7.63189644981003	0.722552291612231	0.395307985274988	0.564590625535377	Activation
GGCATGACCTGCTATATAGT	YHR028C	1.56621560604677	4.9310234079396	0.720020357643725	0.396137231557716	0.56476639790452	Activation
GCCCACGTTTCGTTTCCATG	YMR194C-B	1.95411797433446	4.38774114201048	0.717411641308773	0.396994252364642	0.565651941277726	Activation
GATTCCAACCATGGCATGGG	YJL173C	3.17023405094396	8.66556012804706	0.715421968105317	0.397649704789821	0.566249401476242	Activation
GCCAGCAAGTCGTCTCCGAG	YIL064W	2.55915211016044	5.88096936166832	0.711664633471222	0.39889174722818	0.567007948934899	Activation
AACTCAGTTTCCTAGATGGG	YGR168C	2.42452188783804	7.86142153856693	0.7119853515436	0.398785510165604	0.567007948934899	Activation
CAATAATCTTGCCAGGTGGC	CUT079	-2.30628725194035	6.23142011922422	0.711834984484941	0.398835313778014	0.567007948934899	Activation
AAAGGTGGGGCACTTGTGCC	YOL136C	2.21472275654837	6.21146470420545	0.710205426129765	0.399375623837392	0.567359446659991	Activation
ATGAAAATTGATAAGTAACT	YNR013C	2.82704534108892	8.65558125899157	0.708824803652728	0.399834224855189	0.56755332420894	Activation
GGAGAATAAGATACCTGACT	YDR488C	2.31562963160052	5.88484024388178	0.707684217559721	0.400213669133229	0.56755332420894	Activation
CGAAATCGCTAAATTTGCGG	CUT891	-2.36579752920095	6.55345724140398	0.707658798211193	0.400222131458431	0.56755332420894	Activation
GGTCAACAACTGTAGTGCGT	SUT361	2.68235378935384	8.14400477983834	0.706883048374131	0.400480510304278	0.567584080206654	Activation
AGTTTTTATTCTAGTCGGTT	YEL017W	2.60280000935476	6.2628874883602	0.703788404115706	0.401513656016684	0.568712195586538	Activation
GTTCGATCATTCTTTAAACG	SUT064	-2.22045039924167	7.24216620421323	0.694751890851758	0.404552774077	0.572678602264844	Activation
GATTCTGTAAGAAATTGGTG	YPR010C-A	3.08671162376831	8.2223831476122	0.692960535910586	0.40515921451877	0.573198699950448	Activation
GTGAACATATTCAGAGGCTG	YER052C	2.41962168304298	7.31016985573995	0.691170737360521	0.405766454808106	0.573719315229857	Activation
GAATAATCACAGTAGTGGTG	YDL082W	2.76191661998519	8.21502202617578	0.689310135912515	0.406399128206869	0.574275256004756	Activation
GGTATGGAAGACCAAAACAG	YDR083W	2.59956954389091	8.28364820717573	0.688256325763028	0.406758102900438	0.574444011045495	Activation
CATTATAGTATATCTTCTCA	YNL248C	2.82164572889579	8.1872044287891	0.6870381650432	0.407173641307023	0.574475018530366	Activation
GGGTGTACATCAAGCTGCGC	YLR439W	2.80717584224677	9.55879315228438	0.686250023963986	0.40744282289057	0.574475018530366	Activation
GGATTTCAAACGGAAGGAAT	YNL237W	2.76214813325509	8.70333768582211	0.686086364868466	0.407498751676461	0.574475018530366	Activation
GCTGATAATGTTCTTTACGG	YPL174C	2.47399214398779	6.67947967101584	0.684831638836911	0.407927915172393	0.574605701602953	Activation
ATTCAATAGAAGTAAATTTT	SUT126	-2.09993380239413	6.61644502410456	0.684414649154515	0.408070688002431	0.574605701602953	Activation
GCCCACTAGCCGGGGTGTAC	YLL051C	2.61508984043853	9.84190229230848	0.683278311613435	0.408460130010963	0.57473048557783	Activation
GTATAACGGCACCCAGCCGG	CUT660	-2.55781302184334	9.03375712197907	0.68275795205912	0.408638648002586	0.57473048557783	Activation
ATTATTATTCATTTTATGGC	YDR219C	2.69597359007659	8.29091514560714	0.679363708288861	0.409805914997392	0.575464806772537	Activation
GGGATATTCAAACAAGACGC	YMR089C	2.17819130774255	4.88564929091982	0.680283189439435	0.409489225923619	0.575464806772537	Activation
AGACTGCCCCTCTCTTTCCG	CUT849	1.86673224169559	4.76980790919519	0.67914676311274	0.409880688059839	0.575464806772537	Activation
TAGTTCAAGTGTCGACGCTG	CUT655	2.80780180647192	7.41051642177226	0.675983580849056	0.410973204076153	0.576323826534863	Activation
GGAAAAATATCAAAAGTACG	YDR129C	2.64881135033919	9.15142870240597	0.67629259382946	0.410866286877163	0.576323826534863	Activation
AACAGTTTACTGCAGCAGAG	YNR054C	2.42489814618472	8.09737038691561	0.673104999547544	0.41197115295562	0.577346849036742	Activation
GAATATGAACAAAATGCATT	YPR156C	-2.16423988222155	6.29497493941209	0.672491683895866	0.412184239178858	0.577346849036742	Activation
GAAAGTATTTTCTCTTGTTG	YKL029C	3.05451341548179	10.0938428512933	0.670686092231634	0.412812506308881	0.577889311225159	Activation
GGCATGCTTTTTAACAAGCG	YPL100W	2.67574443653703	9.47229654963898	0.668672099675588	0.413514956901795	0.578197589883675	Activation
AGTCAGAATTAAAATAGAAG	CUT383	-2.06004463020367	6.27977502012326	0.66867303271457	0.413514631063069	0.578197589883675	Activation
ACACACAAAGTATTATTATC	SUT840	-1.93924212861444	5.60888296466795	0.661243570205581	0.416121259264575	0.581502785382547	Activation
CGTCGCCGCTGCCCGCTTCG	YLR315W	1.93891899770656	5.49259916638977	0.659303042829943	0.416806103222851	0.582120579806871	Activation
ACAACGTTGAGTTTAGAATC	YPL008W	2.5262574361264	6.29723428694176	0.657579136020107	0.417415902450635	0.582632906913052	Activation
AAAGCCTTTAAGCTAAGAAA	YFR003C	2.66679882850948	7.88884140558846	0.655445272539135	0.418172553620302	0.583349495975268	Activation
GCTTAATATTTACTCGGTCG	YNL221C	2.91856118018467	9.25518508711084	0.651794771301501	0.419471731974004	0.58387032898875	Activation
GGTTTTTGCCATTCTAGTGG	SUT047	2.84083203173364	7.98898135184749	0.652166834494705	0.419339043394398	0.58387032898875	Activation
GTTTATGAATTACGTGCATT	SUT448	2.77433900110136	8.74280498350601	0.652933576452494	0.419065797979761	0.58387032898875	Activation
AAGAAAAAGAAGCACAATAT	YDL086C-A	2.58366145482096	7.29548795631868	0.651659917490981	0.419519840220023	0.58387032898875	Activation
CTTCGCCGCAGGCTTAGTGG	YJR123W	2.27426166426807	8.23217573539924	0.649356695764624	0.420342771508843	0.584337371639539	Activation
GGTACGAGCCCATAACACGT	SUT140	-2.02825916469633	5.22418949429002	0.649990334185834	0.420116135352118	0.584337371639539	Activation
CATTTTTACAAATTATGTTG	YGR277C	2.92165564833059	7.59797210182131	0.648575451303152	0.420622453729462	0.584387395158314	Activation
GGTCTGCTTCTGGATCATGC	CUT329	-2.40940039008025	7.18955421323547	0.646548407216969	0.421349423795627	0.585058435588832	Activation
GTAAATAGTACCCTTTGTAG	CUT548	2.46748172975591	7.68390052607802	0.641734482347058	0.423083413055438	0.586786596013268	Activation
GACTGGAATTAGAAGAATGC	CUT749	2.01971960287504	6.82446142083987	0.641893213083239	0.423026067673478	0.586786596013268	Activation
GAAAAATTTTTTCTTCGAAG	CUT691	2.45498119167912	6.24612862737342	0.636843522527051	0.424856119984563	0.588904610244498	Activation
AAAATGGTACAGAATATTGT	YER074W-A	2.56011016187462	9.33274010877355	0.636043185653596	0.425147259482917	0.588967722842308	Activation
GCCGTTGTTCGAGCCTTGCG	YOR288C	2.53548705457996	10.5268472274509	0.633457681482419	0.426089843021351	0.589932704136952	Activation
GGACAGCGACGCAATTCAAG	YPR146C	-2.05874853894747	6.67374867412714	0.627302573261101	0.428346477430202	0.592714860287147	Activation
GAAGTTTAAAGATGATGAAT	YBR231C	2.90465820381666	8.53498113780728	0.625596501302311	0.428975161899063	0.592900540768849	Activation
GGAAAATGAACTGCACACAG	YPL031C	2.41526956372268	7.17180191661832	0.626239702110443	0.428737980009451	0.592900540768849	Activation
GGAAGTTGCTACAAAAGGGG	SUT784	2.69431946049158	9.80830608272693	0.623924450468065	0.429592663241271	0.593411985283738	Activation
AAACTTGTCGTTATTAGAGT	YGR187C	2.64393936225794	8.41008751672417	0.622320246252723	0.430186372600883	0.593889995104731	Activation
GTATTCATTATACGATTATT	YOL012C	2.6927152023644	10.3789915248797	0.618345064916038	0.431662935742557	0.595585569568844	Activation
ACAAAAGACACAAAGAACAC	YPR065W	2.43130925476512	7.881730785426	0.61695757199866	0.432180123195206	0.595668422938305	Activation
GGATGAATTCTACTTGATAG	YGR072W	2.39030715297564	7.12796707038775	0.616851259856909	0.432219789788428	0.595668422938305	Activation
GATCGCGTATCGCTGAGCAG	YFL042C	2.61210451043507	8.83877151828705	0.610797542061007	0.434487679413088	0.598450003005506	Activation
AGTGCCCTGAGAACAAGCGG	YIL057C	-2.27392754929141	7.44182688430671	0.610105682076394	0.43474802175043	0.598464842799961	Activation
GATATGATATCTAAGTAATA	SUT244	2.68225488332439	7.57757328238594	0.608036906518588	0.435527908362193	0.599194448796637	Activation
CCAAACGAGAACGATAGCAC	YMR201C	2.77972890923893	7.59316648995471	0.605320748706133	0.436555090426915	0.59961780980343	Activation
ATATCGAACGATTTAATCGT	YPR173C	2.22143100909264	7.9084431565796	0.605239752015343	0.436585778113757	0.59961780980343	Activation
GAAGAAAATGAAGGGGAAAG	YJL139C	-1.7897567480647	5.46725414870433	0.606086034390496	0.436265304783888	0.59961780980343	Activation
GTAGAATATAGGCGAAGCCG	SUT107	2.08017021146673	7.59921409929021	0.603989089116261	0.437060042831549	0.599925576823157	Activation
GAATTCTAACGATATAAAAG	YPL022W	-1.8761707413001	6.70254468071703	0.603229953953849	0.43734829927463	0.599977815595288	Activation
GAAATCGTTATCGAAGAAGC	YML077W	2.75717951304152	7.70316520230468	0.60005525603341	0.438556944178338	0.601291910886024	Activation
TATTCCCTTTCTATAGATTG	CUT138	2.32780190643814	6.96391947986509	0.597862745344184	0.439394649393568	0.602096210997587	Activation
TGCGCCGGGTGGCATATGGG	YJR120W	2.32302583032838	9.01159736818595	0.596135511851372	0.440056313729734	0.602658503897146	Activation
AATGATAAACCTTTAGTTTC	CUT648	2.4770818047519	8.02325388365196	0.594131293093545	0.440826005214665	0.603368013986739	Activation
AGAGGTAGAACCATATTTAT	CUT421	2.32751657792651	7.59456289138432	0.58486563821608	0.444411440926034	0.60792848564782	Activation
GTGACGCAGCGGCATTAGCG	YLR354C	2.78247690266275	10.3605019163906	0.581874465778284	0.445578526738941	0.608516284553302	Activation
GAAATAAAAGTATTAGCGGG	YPR185W	2.65724850633262	8.92596707676624	0.580642671392948	0.446060524475666	0.608516284553302	Activation
GGAGTTTCGAGCCGAAATCG	YLR140W	2.61638031377168	9.17414230097486	0.581452743163697	0.445743454732255	0.608516284553302	Activation
ATTGTATAAATGAGATACTT	YBR082C	2.46554072387892	6.90924374407987	0.580944895716991	0.445942190150367	0.608516284553302	Activation
CCTAAACGCGCCAAGATTAC	YPL189C-A	2.36631447601757	7.89661151090483	0.580516509959141	0.44610993671589	0.608516284553302	Activation
GTGAATAATTCGATAATTGT	YERCdelta8	2.5734109612023	8.82269606895492	0.577961755970623	0.447112358325121	0.608547174654673	Activation
GGATTAATGGTTGCGAAGTG	YGL028C	2.28765550147582	8.91057070632053	0.577871913736111	0.447147673787128	0.608547174654673	Activation
GGCCAGTTGATCGAAGATGT	CUT274	-2.08607977830153	7.35867143075309	0.579769079982918	0.446402848438149	0.608547174654673	Activation
GGTCTTCTAATCCATCAGAT	YDL160C	-2.04783446508075	6.02394052367302	0.578370129283228	0.44695188825703	0.608547174654673	Activation
GGTGCGATTGCAACTTAGCG	CUT921	2.42671335596237	11.0786644385218	0.576845061841709	0.447551619830542	0.608726911003231	Activation
GACACGCCATGCCCCAAACG	YML027W	2.37622153722683	6.24922565150223	0.576246270859126	0.447787435783861	0.608726911003231	Activation
AGTCAAAGTGTACAAACATC	YDR281C	-1.96926044420114	6.633879374319	0.575085772274784	0.448245013827191	0.609003707171448	Activation
ATCTACTTAATTATAATTCT	YGR017W	1.99929560313547	7.45781900124545	0.573616922930937	0.448825216625756	0.60944669845332	Activation
GGAATCTTGGGCCCAGGAAT	YDR167W	2.68608836348903	10.4919004910401	0.572241247778643	0.449369676238961	0.609593845529489	Activation
AAGAATATTGAGAAACGAAG	YBL093C	2.35490950065017	7.67611445948322	0.572058701107926	0.44944200120773	0.609593845529489	Activation
AACATTTCATGAACGGCCAG	CUT787	2.32597178487936	6.03031608048028	0.566061271630883	0.451828320911662	0.612484066447805	Activation
GATAAAAGGAAGTATTATAT	YDR322C-A	-2.01680143894236	7.24281615961462	0.565197287200943	0.452173723231606	0.612605982095701	Activation
GAAAAAGGCGTCTGGCTTCG	YKL164C	2.06811873557013	6.0171936619538	0.562207288139682	0.453372257313899	0.61388293226354	Activation
AGTGACCTAAACTTGTTTAC	YOR372C	2.48574639449511	8.54072901863942	0.555731670237221	0.455985148013444	0.616724413387614	Activation
AGCAAGCCTAGGTAAGATGT	YHR206W	-2.08509361422919	7.99119334200321	0.556175553414525	0.455805287555974	0.616724413387614	Activation
GCCCGGCGCTTGCCTTGAAC	YPL156C	-1.88160727026926	7.12771252346639	0.552562378177269	0.457272593893195	0.618117068859009	Activation
CCGGCGCTAATATTAATGGC	YKL171W	-2.10908109799451	7.25519538697218	0.550793492350224	0.457993654756687	0.618742976961428	Activation
GCAATGGTTACGGCTAACCG	YER048C	-1.77059930859857	6.4573662560419	0.549668414684676	0.458453211359091	0.619015090562556	Activation
AAATTGGTGAATTAAAGAGG	YDR320C	2.37051454977357	9.32924091137653	0.543493490895274	0.460988505840359	0.620690868616047	Activation
GAAGATACCGTCGACTACGG	YDR453C	2.35140859193644	10.3423207965174	0.543800960138071	0.460861740167071	0.620690868616047	Activation
GGCGAAAAGACGAGCAAAGG	YGL173C	2.25990731333763	7.83094389547583	0.544220549983042	0.460688837827844	0.620690868616047	Activation
CGTTGCACAAAATGAAAGCT	YFR026C	2.2492578089952	7.17343928155174	0.545836929504929	0.460023729491531	0.620690868616047	Activation
AAGTCACGTATATAAGCTAG	YFR029W	2.10151750120809	5.29142879683259	0.54504727407371	0.460348466778489	0.620690868616047	Activation
GGAAAAACTTCTAAAAGTGA	CUT686	2.16288035088155	8.15784459382065	0.541604377634327	0.461768579908796	0.621392286543936	Activation
TCTTTGAAGAATTAAATTAC	CUT757	1.86460142585011	6.12071645395342	0.53711342150896	0.463631486275979	0.623549245142904	Activation
ACTTAGTATCGTCTATTATC	YLR142W	2.01886254459486	6.10214098036337	0.535682541281948	0.464227549845699	0.624000933032504	Activation
GGTCACACTAAATAATCGCG	YJR113C	2.53026599447293	10.7266369334488	0.533204256223886	0.465262830216632	0.62469219868952	Activation
AGAGATTAATTGTAGGAAAG	YFR012W	2.29834329674197	6.28608441909397	0.533439167613619	0.465164540026929	0.62469219868952	Activation
AGTAAAAGAATATCATAATG	YLR313C	-2.17286167025412	5.79664407640445	0.531295733597822	0.466062615080691	0.625415865116674	Activation
AACTAAATAAATAAAAATCG	YFR050C	1.92954805292408	6.50112185481755	0.529180194309966	0.46695172683763	0.626258524024965	Activation
AATTTTATTCGAGATATTTT	SUT758	2.2249155408666	8.44690376114231	0.527423554205223	0.467692069380352	0.626550604678259	Activation
GATTCACAGTATTAATTTTT	YKR103W	2.13301216500374	8.32828027946092	0.528037825632268	0.467432968452597	0.626550604678259	Activation
GCTTATTATAGCACCGTCGG	YDR231C	2.25211164296469	10.0574701103959	0.526272190971287	0.468178338106503	0.626851845214625	Activation
ACAACACTGTTGTAATTATG	CUT852	2.26840864081602	6.62000924629881	0.525042879057118	0.468698424788844	0.627198003707393	Activation
GTAATATGAACACCAATCGG	YFR007W	2.28290724399848	6.72440498246745	0.523806774816944	0.469222322190657	0.627548872623087	Activation
GAACCAAAATGGTAGGAAGT	SUT094	2.15069298381116	8.4891257761629	0.521924355897061	0.470021958972718	0.628265655804577	Activation
GTCTGGATCCATGAAAGGGT	YDR049W	2.12278921319835	7.75938827372525	0.521312702724854	0.4702822569513	0.628265655804577	Activation
AGGAAAAATTCCCCTATGTG	CUT176	1.93310433498224	7.46337125413436	0.520454413285959	0.470647906578955	0.628404053438938	Activation
CGCTTCAGAAGCTCGAATCA	YAL048C	2.37810789340733	7.14118202462125	0.518976711898125	0.471278514241065	0.628895869310002	Activation
GGGTGGGGCCGGATAAACCG	SUT700	2.13285476089566	8.27383731696037	0.517385308564959	0.471959171043976	0.629453888856204	Activation
AATAAAAGGCAATACTACGT	YHR085W	1.71794743835137	4.52817144930834	0.514960557930269	0.472999317358402	0.630490474166453	Activation
GCTGAATATACGGCGAGTCG	YHR090C	2.23258395189815	7.78178356081027	0.511348874840424	0.474555520793535	0.632213410479387	Activation
GCTGCTTGTGATGTTTTCCG	CUT765	2.19919026538536	8.72770439804804	0.509790794465744	0.475229433579848	0.632759678914201	Activation
GCTACCAAGAAATCACCGCG	YDR465C	2.07643029984796	5.25745286139389	0.508273478129566	0.475887210826927	0.633283868791882	Activation
CGGTGGTTTGGATGCGTGGG	YPR030W	2.054722024753	6.56402402461982	0.505228177752071	0.477211869911402	0.634342607565156	Activation
ATAAAAGATAACTAAATAGG	SUT128	1.92702320458511	6.71904042536123	0.505232481862116	0.47720999345122	0.634342607565156	Activation
AATGAATGATTCCGAGATAG	YIL073C	2.39225006957118	9.26370202603658	0.502205064012216	0.478532835280691	0.63574611579119	Activation
AGTTATATCGTATATTTCTT	YKL203C	2.32848666761081	8.06353148818831	0.501085269314947	0.479023652045344	0.635763777300885	Activation
AAACTTGAGAGATTTTTCAG	YOL045W	2.26127961101543	8.1026934390281	0.500965095469114	0.479076374304712	0.635763777300885	Activation
GCATCACAGAGCATCGCCTG	YAL034C	2.12562385493939	7.55435532300676	0.499536908276323	0.479703671359385	0.636244139336175	Activation
GATTCCTCAACAGGCAGACG	YIR015W	-1.73425292036845	6.14746068499466	0.497799426625618	0.48046863410677	0.636906459142086	Activation
AACAACACCAACAAAATCGG	YHR099W	1.92790717359874	6.80814832144747	0.495664934065362	0.481411130929537	0.637803255231509	Activation
AAAAGCTTTACACGTGACGT	YDR530C	1.98805254669926	6.08030554682253	0.4932320205702	0.482489105590444	0.638214168676142	Activation
GATCCGAAGATGATACATTT	YOL033W	1.95449985382311	6.933520312015	0.493666886584464	0.482296134156066	0.638214168676142	Activation
GGTAATAAGAAGAACCGTTG	YFR015C	1.75797709712322	4.55641434507096	0.493163057225082	0.482519719687175	0.638214168676142	Activation
GTAAATAATATGCAACGGGT	YBR014C	-1.97627658637368	7.94210529625467	0.491270836015115	0.483360960669188	0.638974412174593	Activation
GATATAGCATAACCAAATGT	YGL196W	2.55076945685547	9.0215804784726	0.486282068801797	0.485590492600696	0.640622286568763	Activation
GATCTCGAATGACAGGTCAG	YIR018C-A	2.30434656888006	8.88769788430844	0.486504310782489	0.485490809052801	0.640622286568763	Activation
GAGCCAGATGCCGAAGCAGC	YHR032W	2.08415873468458	7.69630123317307	0.48609124235019	0.485676112169312	0.640622286568763	Activation
AATGAAAATTTCACAATAGC	YDR487C	2.06134263260677	5.56675400996937	0.487369797372199	0.485102929381159	0.640622286568763	Activation
AGCGCACTTAGCGGAAAGTG	SUT017	2.23015322993647	7.45607992251472	0.484787896355547	0.486261563064752	0.640815600054314	Activation
TGCAACAGCTTCGGATTTGG	SUT514	2.14037121531071	7.4633570925408	0.484575394626733	0.486357127647561	0.640815600054314	Activation
GTTCTTTAGAATGTGCGATG	YDL194W	2.22715358650485	6.8918964843606	0.480979373018461	0.487979035502125	0.642599520666719	Activation
GGGATGCGATACATTGTTGG	CUT359	2.33694370474465	8.12829375961612	0.479170533897797	0.48879827107363	0.642741404555884	Activation
GAGAAATTAAATATAATATA	YJL070C	2.0942056371412	6.13731742407464	0.479556902140918	0.48862309031111	0.642741404555884	Activation
GCCTAATATGCCTGGTGTGC	YGR149W	-1.76751386737764	6.31478082324015	0.478966381882177	0.488890876526244	0.642741404555884	Activation
GTTTATAAAAGTAACATGAT	YML050W	2.05843161082094	7.49179473037676	0.474554808218524	0.490899172863844	0.64467481737541	Activation
GAAGGCATACAGTATAATGG	YBR097W	1.78791061765405	6.33170995313275	0.474899866552974	0.490741595168196	0.64467481737541	Activation
GTGCCTGCTGATAAGTACTG	SUT805	2.16375133480682	8.34281783636634	0.472660863585066	0.49176558708492	0.645459155900185	Activation
ACGTGACCCAACTTTGTTGT	YBR094W	2.13659690862735	7.62530347467324	0.470402603226358	0.492802010536558	0.646465657148067	Activation
ACAAATATATCACGTTACAC	CUT756	2.23753209460314	8.76321432336922	0.469632624746519	0.493156226890766	0.646576616776412	Activation
GGAATTGTCGATGCTTGGAC	YFL001W	2.2616675010628	8.75639746578832	0.468408478393098	0.493720255433293	0.64660905108085	Activation
ATAGTTGGACTATATGTCAT	YLR115W	1.90437558530421	6.98574447160377	0.46865908036675	0.493604701884664	0.64660905108085	Activation
GCCTTCAGGAAGGGTGATGG	CUT603	2.18003636367338	10.1643341408287	0.467726529278934	0.494034934796677	0.646667998713118	Activation
GCAAAAGCATAAACAAATCC	YMR190C	2.28860431927154	7.408680926695	0.465217838897918	0.495195452179442	0.647232619240194	Activation
GCATAAATCGAATATAACTG	YDR378C	1.84957396203329	6.80444965367658	0.46526013370842	0.495175848674035	0.647232619240194	Activation
GTTATACTGTTACGAAGTAA	CUT766	-1.5407603208086	5.80234217039672	0.465044078049829	0.495276003463618	0.647232619240194	Activation
GGTCCACAGGTGCTTGAACG	YBR289W	2.20147931314905	10.0689531392254	0.462219840405933	0.496588351165781	0.64859415364681	Activation
GGTAGCTAATGAATCTGAAG	YDL064W	2.01447801670083	7.48107138854076	0.460675605842011	0.497308397080285	0.648827821653168	Activation
GCATAACAAAAAAGGGAGAG	YPL034W	2.00735670973433	7.436070005199	0.460792020317908	0.49725405391449	0.648827821653168	Activation
GAAGCTATTTCACAATTACG	YLR088W	1.40483383072116	4.95610543989577	0.459506920112618	0.497854504888342	0.649079905536641	Activation
GGTCTTATGATCCTTGGTAC	YDR376W	-1.99090107737278	7.59560999722316	0.459104116468912	0.498042963380909	0.649079905536641	Activation
GTGTGCTTCGTAGTGGTGTG	YJR134C	1.82185212199986	5.80356438322408	0.458505047864215	0.498323470982818	0.64909271233938	Activation
ATGCAGACCGACATGGAGGA	YDR489W	2.28858999884607	7.66128271810671	0.454908752789857	0.500013036783841	0.649529394478685	Activation
GACCACAGGCGTGTTTAGCG	YDR156W	2.25046496850693	9.7529745934027	0.456800346456202	0.499123144310847	0.649529394478685	Activation
GATCTACATAAGCTTTCGCG	SUT585	2.11585456500874	7.50763773910121	0.456019526875322	0.499490151956823	0.649529394478685	Activation
CAAGCTGGAGCGTTATTGGT	YDR044W	2.03279187076365	5.93749116870106	0.455438902522758	0.499763358795796	0.649529394478685	Activation
GCAAGTGTCCAGAATATGCA	YHR118C	1.8583643827855	5.81086172829129	0.454951389778338	0.499992948748866	0.649529394478685	Activation
GTTTCATTTGCAGCGATAAG	YIL098C	-2.13715430267134	10.3148897843644	0.452651529231478	0.501078467595263	0.65011009546769	Activation
GGGCTCAGATTCTCAGTGTG	SUT488	-2.04928770148437	7.43189866941049	0.452771580843979	0.501021705004418	0.65011009546769	Activation
CTATTTAAAGTTACTATCTT	YGL185C	-1.63693166726827	6.14922925438172	0.452239468702853	0.501273380533677	0.65011009546769	Activation
ATGTCTCCTGCAACGAACCG	YMR135C	1.72739863293404	4.81213278521174	0.451182809169413	0.501773791727076	0.650407325708934	Activation
CAGTCAGCGACTGGTAAGCT	YDL120W	2.08763289449465	6.50338342651409	0.448340077637127	0.503124280836843	0.651598507358047	Activation
GGGAATACTCAAAAGACCAG	SUT550	2.0167035747933	5.99037189898457	0.448105051108867	0.503236211687699	0.651598507358047	Activation
GGGAGCCAGAACGCTTCTGG	YKL178C	1.77622904836128	5.82899977468	0.446604113069832	0.503952034080938	0.652173220575332	Activation
GGGAGTTGATTACATAACAG	CUT676	2.13318222322142	8.08157313739249	0.444598956313059	0.504911046624701	0.653061860736804	Activation
TTACATAGTAAAATATTCAG	YJL173C	2.10250363719135	7.58056845179135	0.440329641290752	0.506963394457763	0.655226029813504	Activation
AGAGTCGTAATCGTACTGGG	snR41	1.96057754221844	7.86699503694782	0.439982838353403	0.507130738671336	0.655226029813504	Activation
CGTTCCACGTGACTAGTCCA	YJL166W	2.08370699959857	6.75643771704396	0.43789575961552	0.508139834998115	0.655823102435673	Activation
AATCAATCCATGCTAAGGTG	YCR098C	2.01858039810459	9.22765388432256	0.438302320388885	0.50794299316222	0.655823102435673	Activation
GAGATTAAAGAGATTCATTG	YMR125W	2.27128767199406	8.03776371069374	0.428624266227555	0.512664773044654	0.661307222033932	Activation
GATATCCACTTAGCTAAGCG	SUT250	1.89321209394497	8.12562433802926	0.425760871531278	0.514076389037758	0.662771602641152	Activation
ATATATATTTAAAAAGTACT	CUT158	2.03909940621124	8.08326545570022	0.424039003562365	0.51492850956935	0.663513469074316	Activation
GAAATTTTTCAAATGTGATG	YDR411C	1.95496673398326	7.595657152021	0.422073437804776	0.515904248207152	0.664413741783432	Activation
GGATTTATTTAATCATGATT	YJR090C	-2.03571775617365	8.04590368968538	0.420647441427128	0.51661416027738	0.664970883706473	Activation
GGCAAAATACCATGATATGG	YHR133C	1.82818231825205	7.87615835556673	0.419732120018741	0.517070741427465	0.665201522501643	Activation
GCTAAGAACATTTTTGCTTC	YBR070C	2.07372592599376	6.95756094612142	0.41912282529035	0.517375062180254	0.665236138932037	Activation
CATCCTGGTACGTTTTTAGG	YHR007C-A	2.05177047384044	8.35787488851752	0.417783457861296	0.518045132873559	0.665740744175131	Activation
ATTATATAAGAAGTCGTTTC	YKR009C	1.85533706946662	7.18830717404176	0.416265867324046	0.518806209336441	0.666076264074748	Activation
GAAACTTTTACCGATAGCAG	YPL117C	-1.66471906577957	7.16531249498224	0.416155284688419	0.518861743657894	0.666076264074748	Activation
GCGTTCTATTATTATACTTC	YAR003W	1.93990378720812	8.55226947501938	0.413743779633217	0.52007540094623	0.667277052685425	Activation
GTAAAATCCGCAGTCAGCGC	YHR132C	1.99491738808337	10.5130765990745	0.411414486691626	0.521252439538667	0.668072341001455	Activation
AAATTGGTTACGGGAGTACC	SUT614	-1.77834871092195	6.50960890593473	0.411793134268257	0.521060781544949	0.668072341001455	Activation
GGTTAATGAATCGAAATCAC	YAL007C	1.80330496377109	8.37956573216512	0.410151083470367	0.521892831321282	0.668535795677582	Activation
GTGAACGCGATGGTACAGGG	SUT674	1.94071623084746	8.65009841224065	0.408897865862379	0.522529435788994	0.668993906578755	Activation
AATCCACACATTAGAAGGCT	YLR114C	1.86945517304464	7.44857331066114	0.408031635097506	0.52297026408698	0.669201010288462	Activation
GACTTTTTATTAGATCAGTT	snR66	2.08462188037537	9.79768964123374	0.407102016116774	0.523444084445345	0.66937279541265	Activation
GACGTGATTCCCCTAAACTC	YBR066C	1.89207601662052	8.59121677947464	0.406673431664521	0.523662787403724	0.66937279541265	Activation
GTTATTGACAGGGAATACGG	SUT801	1.95014297404705	7.46241229746266	0.403667906944429	0.525201050662765	0.670624131783446	Activation
GTTTCCATAATTCGATTCGC	SUT580	-1.91481853474369	8.61230320626362	0.404118908848004	0.524969710657288	0.670624131783446	Activation
GATGCGGTACCTTTTGATGC	SUT039	2.25326182844281	9.04424201442673	0.392414281077669	0.531033075414426	0.677545102293008	Activation
GAAAACGTAGAAGAAAATTC	YLL029W	1.66841955934689	5.76686616141967	0.392121567575471	0.531186318728463	0.677545102293008	Activation
CAAATTCATTTCTGTTTCGG	YML005W	1.84723875721507	7.44149533417004	0.390822096418191	0.531867589283947	0.678053417917547	Activation
GAGCAATAGCACTAGCAACC	CUT156	1.95970006516619	6.49001056009727	0.385319271735679	0.534770110600319	0.681391458671395	Activation
CAGCCTCGCCTAGCTCTAGG	YMR056C	1.31395373641915	4.53876927238325	0.377578644730018	0.538901961891128	0.686291505371707	Activation
GTTGTCATCAACATCGACGC	YBL034C	1.94677941605684	10.4947861624441	0.374342505174525	0.540646693618222	0.687853811634078	Activation
GATACTAAAAGTTCTCTCCG	snR6	1.87503032421711	8.66593167848598	0.374239434541396	0.54070243324864	0.687853811634078	Activation
GGCAATTTAACATTAATCTG	YEL055C	1.9783359166576	8.51937008003705	0.371778486284223	0.542036433202333	0.688932402693974	Activation
GTAATGAGTATTAATCAATG	YML066C	1.60333012443604	5.5036719396234	0.37161572839569	0.542124872345091	0.688932402693974	Activation
TCAAATTAACTTCTAGAGCA	YNL035C	2.07918644059683	7.60317780437896	0.369377396606319	0.543343836040428	0.689783678276735	Activation
GTGGGTAATACAATATTGTT	YER048W-A	-1.44135901293512	6.64464140296456	0.369329371617136	0.543370045147937	0.689783678276735	Activation
GGACGAATTTGGCAAAAGTG	CUT613	1.65707522699027	7.44337106928118	0.367262881523478	0.544500025472738	0.69085241327176	Activation
GTTTGTCGAAAAAGGATCAC	CUT578	1.50962479761866	4.72786954884057	0.362919405750242	0.546889325893575	0.693516976992487	Activation
GCCCTAGCGAGGGCTTGCGG	YKL181W	1.97441045829051	10.1390746021138	0.359644928451711	0.548703499286371	0.695082404272962	Activation
GAAGAAAATGTTGTTAATAT	SUT722	1.88751829627548	6.78487368201165	0.360046751260313	0.548480272196256	0.695082404272962	Activation
AAAAGCATTTTCAAGGTTAG	YJR143C	1.88427051793044	7.56705376813841	0.357434533004152	0.549934493884643	0.696273979057747	Activation
CGCGCGATGTGCGATAGTGG	YDL131W	-1.71560088331759	7.48992112578121	0.356188622549096	0.550630634526467	0.696787473136922	Activation
CCTTTCAGGGACCAGTGCAG	YDR133C	1.75160959439074	7.331243693322	0.355149261090179	0.551212632298028	0.696788556800565	Activation
GCGCTCCTAGAGGGAAACGA	YMR192W	-1.41263107804112	5.82508175006865	0.355402374941583	0.551070793187522	0.696788556800565	Activation
GCCAATTTGGGAAAAAAGGG	YGR146C	1.81022315824277	9.28270525140552	0.353910305435825	0.55190790393471	0.697299870197805	Activation
GACTTGGTTATTTATTTACT	SUT238	1.814173750385	8.21044565122064	0.351156286261321	0.553459313195548	0.698891749890955	Activation
GAAAATCTAAATGTCTTCTT	YPL059W	1.5889853665154	7.7561679813527	0.349743259527166	0.554258500604436	0.699532570762862	Activation
GGAAAAGATCTCAACTCTGG	SUT582	1.84583722099392	8.40604843937167	0.348221566578014	0.555121588615331	0.699939417464626	Activation
GGAACTGGGACCTAACTTGG	YKL017C	1.83247706350787	8.81310512753015	0.347632277492323	0.555456510189818	0.699939417464626	Activation
GCAACAAAGTGCAAGCATAG	YML051W	1.82372313886781	6.48733150632479	0.347969856879166	0.555264600676158	0.699939417464626	Activation
GGGTCGTAGAAAGCGTCTTC	YMR214W	2.01517371862475	7.92937277935893	0.346681087945952	0.555997925313943	0.700253689549808	Activation
GTATTAATACGCTTTGCGCG	YOL010W	1.78239881871952	7.15352033586327	0.345438000576706	0.556706997827993	0.700778677580854	Activation
CGCGCTGACTTATGACAGGT	YGR136W	2.00225850260367	7.9743401287768	0.342356144480322	0.558472357757732	0.702263615051411	Activation
TGGAACTTTCACTGATTGTG	CUT225	-1.72665497953729	7.17945573841027	0.342629794600641	0.558315173703483	0.702263615051411	Activation
ACAAACTCTTGTAAAATGGT	SUT584	1.77419602614867	7.79887467148841	0.341091683958807	0.559199758072169	0.702441602858597	Activation
AATAAAGATATATTAAAAAA	YLR186W	-1.38418061956355	6.46924844527936	0.341556222356311	0.558932315354399	0.702441602858597	Activation
GGCTGTTCTATAGACGTTTG	YOR306C	1.81129246084389	6.57646894914359	0.340386029823118	0.559606482912166	0.702584474357787	Activation
GAGTACCTGGATTCAAAGGG	CUT725	1.77342253345124	7.84193443823224	0.339466066050568	0.560137580942918	0.702883264835749	Activation
GCGATCCTGAGTTAAAAAGG	SUT558	1.69815805094499	7.74269442761974	0.33771264423693	0.561152511986837	0.703788558443742	Activation
GCTGTTTACTGCAGCGATGG	YGR104C	1.81995665114541	8.25570312749053	0.336622142667416	0.561785504810766	0.704214135147002	Activation
AATAAATCACTAATAATTAA	YGL143C	1.9894749150922	8.68926296622326	0.335554256510484	0.562406699791702	0.704624485945925	Activation
TTTTCAAATTCTGTATTAGT	SUT323	1.86727708840686	8.15204917696441	0.334585751146144	0.562971227076499	0.704963447796054	Activation
GAACAGTTCGTACCAACAGC	YNL092W	1.77841291733622	6.40061271536712	0.333671838173591	0.563504934124258	0.704970068296992	Activation
GTCGGAGATTCCCTATTGGG	YGR250C	1.59429257383412	7.19197168186156	0.333569977468704	0.563564479118154	0.704970068296992	Activation
AATAAGGTTTTTAATGAAAG	SUT295	1.99909124199099	7.89715686673215	0.332250051969686	0.564337170079592	0.705183317518635	Activation
ATCTAACAAAATTCTATCCT	YLR107W	1.87927640307038	10.3218972858476	0.331772613946921	0.564617168321843	0.705183317518635	Activation
ACTCAGTAATGAGCAGTTAC	YOR091W	-1.2773060384702	6.13109506936805	0.332151115169239	0.564395170520247	0.705183317518635	Activation
CATTTGCAATCCTTGTATTC	YGR110W	1.84236834579265	9.91782022932266	0.326356686703154	0.567812319463927	0.707699554092774	Activation
ATTTCAGTGTGTTTTTGTAT	YNR019W	1.51919831058389	6.30766356235418	0.326405660794857	0.567783269798492	0.707699554092774	Activation
GATTAAGGCGTACAGCCGGG	YBR126C	-1.69202915575351	8.47867323302212	0.327589720307167	0.567081806697177	0.707699554092774	Activation
ATAATCTAAATCTAAAGATG	YGR029W	-1.44899012653241	6.04651254038151	0.327041024720755	0.567406656605928	0.707699554092774	Activation
GTTCCAAATAGGATGAGATG	YML108W	1.7537212626124	7.27693634588079	0.323871598995875	0.569290192785743	0.708976242912756	Activation
GGAGAAGGCAGAATTGCGCC	YHL030W	1.639357085047	7.30396919549439	0.3236405830504	0.569427958236016	0.708976242912756	Activation
GGGTTACCCTGACAGAGCGG	YDL173W	-1.52218449074783	6.88830364458183	0.322600153372941	0.570049222122757	0.709381439880836	Activation
GTTTGATAGACCTCTAAACG	CUT224	1.74589759714552	8.34745646099434	0.318718845105477	0.572378591191455	0.711910716637505	Activation
ATTTCACTTAAAATTAGTTT	YJL156C	1.71468693744534	8.05948938685624	0.316960916469426	0.573439772461132	0.712583765699415	Activation
GGAACCCATTATAAATTGTG	YOR362C	1.58535720803425	5.3101989121231	0.316838126378974	0.573514039949904	0.712583765699415	Activation
GAGCGGTTCCTTAGATACGG	CUT814	-1.57583972208995	7.25331052980845	0.315670187823053	0.57422139661912	0.713093168872423	Activation
CATAAGTGGAATAAAGACAC	YOR362C	1.3726044180178	5.06821815269564	0.314537046600305	0.57490932582497	0.713208775648359	Activation
AATACCATGTATAAATTGGA	YBR143C	1.32740454461932	6.25747774076787	0.315006314609787	0.574624236192688	0.713208775648359	Activation
ACAATGTAATCTATTTTTTC	YMR231W	1.60929274088417	7.13142328482098	0.311127725687507	0.576988990934864	0.71541861440631	Activation
GAAGATCAATAATAAAATAT	YDR464W	1.71098810979228	8.17599059529234	0.310304753426441	0.577493236666647	0.715673788902645	Activation
CTGCATTGCGCATTTGTCCA	YPL173W	1.87391050913465	7.78406544057874	0.309505154504955	0.577984001135374	0.715912001406315	Activation
GGAGATCAAGTTAGTGTGAG	SUT647	1.70785742831322	8.23459019281762	0.307853923287347	0.579000099156243	0.716800329260026	Activation
TTTATTTAAACCAAAAGGTG	YEL017C-A	1.81282223168804	8.33858185853625	0.305326925041525	0.580562029232741	0.71728544069298	Activation
GAGCTGAGCCCATTGATTTG	YFL002C	1.68922429910202	9.77169251023412	0.305294675612778	0.580582016969007	0.71728544069298	Activation
GATGCGTAGCTCAATATAAA	YPL242C	-1.43475515094893	7.32341846650332	0.306395957240921	0.579900236911559	0.71728544069298	Activation
GATCCTAGTGTGTACCATGG	YDL110C	-1.43241082114092	6.66291829585939	0.305284338836897	0.580588423846987	0.71728544069298	Activation
AATATTTTGCATACTTTTAG	YOL103W	1.80774135832997	7.19260807080874	0.303691321560725	0.581577494572886	0.717767798242811	Activation
GAAAAAGCAATCTAAAATGG	YML042W	1.59841192702263	6.76985101322962	0.303861944954876	0.581471396570268	0.717767798242811	Activation
GGTACCTTAGGACCGTTGAG	YFR052C-A	1.68055187756689	9.98919784834408	0.303079484967064	0.581958270021166	0.717868277526109	Activation
GTATTAACAATCCTATTCCA	YFR024C-A	1.86777535302589	7.95968417588244	0.301957459476309	0.582657863928505	0.718361726324193	Activation
CGTCACATGAAACCACACCG	CUT689	1.75702834037738	9.30413413329144	0.298648624907964	0.584730854392174	0.720176984505616	Activation
GAACAAGGTTTGGATCTGGT	SUT607	-1.6076828271642	5.78622698618163	0.29885735026492	0.584599647765194	0.720176984505616	Activation
GGAGAAAAACCACTTTGCCG	YER184C	1.63695311221835	7.22560642481353	0.296415004396378	0.586138669028245	0.721265963310554	Activation
ACCCGCTAGGTTACAAAACG	SUT439	1.53152637784561	8.05775592520765	0.296291706893687	0.586216581523048	0.721265963310554	Activation
GATTGTCTAATCATTATTAT	SUT309	1.75538700232849	8.75064274540096	0.292777179366449	0.58844632035144	0.723474011786316	Activation
ACCAAGTTGCCATTCGACCG	YDL168W	1.59020108145112	6.89549079163696	0.292472392813218	0.588640501768866	0.723474011786316	Activation
GGAAGTACTATAGCAGAACG	CUT136	1.35980724543187	6.24645965840712	0.292039864008887	0.58891629316384	0.723474011786316	Activation
GCTTTAGCTTGATTGGACAC	SUT682	-1.56917290907089	8.8004529133495	0.290854274001727	0.589673610846993	0.724033445371781	Activation
GAGAGGGCTTCTCCGCTGGG	YML073C	-1.65835208938777	9.12014924244787	0.287617222914952	0.591751531525884	0.725841520511033	Activation
AGCTCCGTTAACGCAAATGG	CUT456	-1.49902287972035	5.1934089644342	0.287879138823031	0.591582844399607	0.725841520511033	Activation
GGCATGAGCGTAAATAGACC	YJL162C	-1.31099997714088	6.96672878172335	0.286574903672038	0.5924238194382	0.726294641622088	Activation
ACAAGTAAGAATTTAATTCT	CUT594	1.47141387392584	7.92607436015073	0.280037696806144	0.596676509976589	0.731134527809842	Activation
GTGCAAGTGAAAGACGAACC	YER150W	1.54771848920127	7.64543326336164	0.277970622911294	0.598034437678811	0.732424198954948	Activation
GATCTCGGCTAACCAAAAGC	YER053C	1.51460425975916	7.27947377763667	0.27629298323565	0.599141285122005	0.733405207617442	Activation
GATGCTGCAATAAAACTTGG	YBL042C	1.815016770767	7.5948855909135	0.274716478257934	0.600185323172336	0.733933913802785	Activation
TTCCTGCAGGTAAAAAGCAC	SUT606	1.77786097257258	9.77977688875334	0.274760840695416	0.600155892049099	0.733933913802785	Activation
AACCAGATGTCTTATAAATT	YML061C	1.7907266578994	8.28197192776076	0.273896527941845	0.600729844378365	0.734225365351335	Activation
TGAAAGGAAAAGTAAAGAGG	YDR318W	1.44772163225146	5.19028707659333	0.271843987898057	0.602097483473017	0.735522040432142	Activation
GAATTTGGTGAAATGCATGG	YJR124C	1.74178715958451	7.51228239419798	0.271286543805225	0.602470050737877	0.735602434658568	Activation
GCGTATATTTCGCTGTAACT	YOR358W	1.50247347256662	8.62332001624	0.269733680890276	0.603510477335571	0.736223685137119	Activation
GAATTTTGTTCGGATTGGTG	YPL071C	1.39017829638267	6.65960326218535	0.269610910656982	0.603592896154952	0.736223685137119	Activation
GCTGAGTTGGCGGAACAGTG	YGR056W	1.65470270605277	7.01897355367998	0.266737811090198	0.60552851867561	0.737605748644919	Activation
AGCCAAGAAGGCGTTAAGGG	YJL122W	1.48878699381577	8.3929681690235	0.266105400966435	0.605956348970179	0.737605748644919	Activation
TCTCGATCTCGAAGATAGGC	SUT181	1.20893230615675	4.47113710800861	0.26654506892242	0.605658842116344	0.737605748644919	Activation
GAGTTCTCGATCTCGAAGAT	SUT181	-1.30325617540612	6.41608495127292	0.266484520444119	0.605699794547232	0.737605748644919	Activation
GGCCTTGGTCCGTAGAGACA	YMR073C	1.47263296534287	7.18641265373119	0.264923305239416	0.60675777478146	0.738206567187185	Activation
GGCAGGAGCTATTAGCTGAG	CUT192	1.35620917265532	6.12141068729836	0.263321141216062	0.607847612303085	0.739157492039958	Activation
GGGTACACACATTGTAGGGT	YMR120C	1.40120268291755	7.6330029684888	0.260638446667008	0.609681872361824	0.741012230067741	Activation
GATTCGAACTATGAAATGCA	SUT187	1.11319715044247	5.1581183932551	0.258915668172019	0.610866085714296	0.742075417194975	Activation
AAAAAGGTACTTAAAAACAC	YKL157W	1.55277637583515	7.23884580749775	0.257011468729509	0.612180790117416	0.742919805010913	Activation
GGTGAGATGCTACAGACGCG	YKL040C	-1.52839129442596	6.24099674914089	0.257249531122812	0.61201609189975	0.742919805010913	Activation
GCAAGTAGTTCTTACATCGC	YDR441C	-1.38713240205764	6.68364499835563	0.254253951104638	0.614095540195466	0.744866517647307	Activation
AACAAGTAACTAAAAATATG	YJL164C	1.3413076580398	6.10220635319081	0.252260016098933	0.615488207227469	0.746178322007822	Activation
GGACGTGGCGTTTCAGAAGG	YKL191W	-1.28570916873168	7.22427512450802	0.251298909786996	0.616161956583752	0.746617671494612	Activation
ATTGTAGAATCTTTATTGTT	YBR018C	1.52204501069275	5.93278717742194	0.250077415392086	0.61702057217552	0.747280470745907	Activation
GATGATACAGTAAAGATTGA	SUT061	-1.48884188649802	5.9304530634612	0.248956032120295	0.617811128407644	0.747860215003296	Activation
ATAATAAAGAACCTGATTGT	YDR253C	1.42286154365493	6.68302502970854	0.248021124383878	0.618471924129396	0.74812102084984	Activation
GAATGGAAATGTCGCAGACA	YOR344C	1.32641358780923	5.73481843273817	0.247768797923015	0.618650535590172	0.74812102084984	Activation
GACAAATGAATATACGATAT	YPL161C	1.38694327137039	6.59745307576455	0.246968695413895	0.619217646511987	0.748429393314388	Activation
AACTATTGAAACGTTTGACG	YOL117W	1.34434692440083	6.95586798709608	0.246188478615573	0.619771766713809	0.748629256055183	Activation
ATTGAAAAATAATAGAAACT	YHR166C	1.18769662326822	4.57435683126322	0.245857191432843	0.620007382204167	0.748629256055183	Activation
AAATTATCTAGTCAGGACTT	YOR129C	1.24195201493592	6.17331838623489	0.244268998348167	0.621139679080406	0.749618998709016	Activation
GTGCCGTTATCATTCTGAGG	YHR029C	1.46389612038826	8.12813305457319	0.243261408859386	0.621860413347232	0.750111303423874	Activation
GAAAGGGTCCTGCTTCAGCG	YER102W	0.997137230157667	4.31417033230313	0.241466996425689	0.623148574681615	0.751287220757422	Activation
GTTTACTTAAAATTTCTTTT	YOR021C	1.39682665280952	7.36642950319963	0.240439065108576	0.623889178543454	0.751802135752363	Activation
GAAGCAATAAGTATAAAATG	YIR031C	1.40079166936683	7.97942906452071	0.23608580240219	0.627047559128425	0.754849421079299	Activation
GATGTGCCATCTCCTTGGTG	YLR139C	1.21704389231065	4.74202564680213	0.236424792803454	0.626800327211664	0.754849421079299	Activation
GCCTTTCTACCGGAAAACTG	YOR287C	1.50405067591725	8.95795786277451	0.234938916214989	0.627885634456596	0.755479052396847	Activation
CTGTTTAGCAACCTCTTTGC	YBL054W	1.65814460078391	8.22022432564658	0.23168105218146	0.630280145505907	0.757979833963473	Activation
GTGAGCGTATTCGCAGTTGT	YLR205C	-1.24490786279666	7.55492827325468	0.229369591238308	0.631991661522875	0.759657145028498	Activation
CCATTAATACCCGACTTCGG	CUT907	-1.17598457221481	6.66168345373249	0.227994969679949	0.633014530028472	0.760505432368876	Activation
GACATAAGTAGTACATGAAG	YPR135W	1.6135666748301	7.87741725951592	0.226951139329479	0.633793786099192	0.760679428961893	Activation
AACAAAATGTTCAGATTATG	YDL177C	1.43757251445149	9.23462363201078	0.227300396638164	0.633532808838603	0.760679428961893	Activation
GCTATGAGATGTGTTGGAGG	YNL073W	1.37506741170161	8.01168774441918	0.225916858814152	0.63456808457289	0.761227747276533	Activation
[truncated: 399 more rows]

## Sheet: Activation_screens_main
Guide	Gene	logFC	logCPM	LR	PValue	FDR	Library
GGGCGTCTGATCTCTGAGAG	YKL085W	11.9153182416547	11.0826122793035	23.5631834550841	1.20878360884624e-06	0.0083108834219282	Activation
GCAACAAAGTGCAAGCATAG	YML051W	12.1697220265531	12.3868570582694	22.4184690964798	2.19255453906118e-06	0.0083108834219282	Activation
AAAACCAAGAAAGTCTAAAA	YNL131W	13.7809481962527	12.7647366399945	22.3923653989757	2.2225575205727e-06	0.0083108834219282	Activation
GCAAGTAACAATGACAATGC	YFL041W-A	8.28998776562672	12.0325836995095	20.5747417951928	5.73477795723895e-06	0.0100877161848988	Activation
GAGACTTAAATGCTTACGGG	SUT230	10.5065985011026	14.0522417131514	20.5733406742815	5.73897679987179e-06	0.0100877161848988	Activation
GAGATTACCGTTGTGGTACA	YAL042W	11.3502280947362	12.1094094189338	20.1963124667521	6.98875267236148e-06	0.0100877161848988	Activation
AGACCATCGTCTTAAAGAGG	YNL321W	7.23208818952913	11.7670798027849	20.1458886673722	7.17543135483784e-06	0.0100877161848988	Activation
GATGCTTTTTTATTTATTTT	YLR342W-A	9.16604969591788	11.7473962561655	20.1409586194015	7.19394985551708e-06	0.0100877161848988	Activation
GAAAATAAACTTTATGAAGG	YGR081C	9.99553936206475	11.650452895284	19.5957164562715	9.5683481697178e-06	0.0119142289826057	Activation
GGTTTATTGTTAGCCGGGAT	YGR021W	8.82289576146758	10.7533311653304	19.3964129625748	1.06206355701602e-05	0.0119142289826057	Activation
GAAAATGGCTAGTCAAGACA	SUT311	10.1303290082723	8.16942606840082	18.796172269183	1.45458761689703e-05	0.0123589682457018	Activation
CGCCTGCTAGGTCATCCATG	YDR383C	13.3887090154157	12.1112680351292	18.6084743681825	1.60505472339737e-05	0.0123589682457018	Activation
GGGCATAGAATTATATAACG	YGL146C	9.74909020962291	11.5269749514825	18.5785422686281	1.63045521189161e-05	0.0123589682457018	Activation
GCACCAGAGGAGGAAGTAGG	YIL124W	7.24280494010567	10.8208967774022	18.4438479554159	1.74984819656396e-05	0.0123589682457018	Activation
GTCCCGGAAACCGTGTTGGG	YOL040C	7.07217076707459	13.8302860891765	18.3620045354364	1.82664437271521e-05	0.0123589682457018	Activation
AAATATAGCATGGTAGTGCG	YOR143C	8.0708146114652	11.535938130047	18.344071889283	1.8439182756891e-05	0.0123589682457018	Activation
GAATTGTACAATCAGTGTAT	YIR023W	-9.5644038096357	4.44415704244234	18.3143557964245	1.87290479744099e-05	0.0123589682457018	Activation
GAAAAAGGGCAGGTTTGTTG	YML117W	10.6744015405177	10.682852682727	18.0892884193475	2.10783892952954e-05	0.0128915037721732	Activation
GCTAGAAAGAAATAAGGAAA	YGR175C	10.1393897200576	11.6988027827838	18.0221963264653	2.18344242887584e-05	0.0128915037721732	Activation
CCATCTGACAATTCAAGGCA	YOR318C	11.5148762323898	11.191624366345	17.892495922519	2.33740935326915e-05	0.0131105290624867	Activation
TGCTTCTAGAAACTTCGACG	YMR211W	13.3073364036115	15.5697141550598	17.6078431604773	2.71466447927672e-05	0.013978648651494	Activation
AGATGATCGTTTTAAAATGG	YGL159W	8.80189119165365	3.01971899472239	17.5892056193802	2.74140016342368e-05	0.013978648651494	Activation
AAACAAATATTGAGACGAAA	YPR085C	11.800976041541	10.8667202641256	17.3767145521009	3.06558771062078e-05	0.0149520708424974	Activation
GAGTAATGGGCCAAGCTCCT	YIR009W	9.01945175108398	12.0928616175464	17.2022466387797	3.3603871507464e-05	0.0151049611210441	Activation
GCCTGCCGGCGCTGCGAATG	YLR096W	6.18847980881041	11.8888992457287	17.1395837514939	3.47308792509881e-05	0.0151049611210441	Activation
GTGTATTAAGTCAACTTTTC	YOR353C	7.30428790447934	13.8130775602056	17.1244439146736	3.5008824135064e-05	0.0151049611210441	Activation
AAAAGTATATTATCAAATAT	CUT167	7.48636063283243	10.6402486935941	16.9561358901722	3.82534824439698e-05	0.0158936135576464	Activation
ACCAAAATATAATTAACTAC	YLL042C	8.24388057131509	10.7827217609555	16.5861826920671	4.64884849131839e-05	0.0186252794198606	Activation
AAAAATGTAGTCGCTATCTG	SUT074	9.4783922985575	12.8733327417635	16.3514975162837	5.26145720525646e-05	0.0189996475309722	Activation
CGAGAGTACGAAGCAAGACC	YER001W	9.2649112922909	4.90581024741485	16.3454444745271	5.27828859523539e-05	0.0189996475309722	Activation
GCATATGCCAGACTTTGTGT	YDL136W	8.36032118655463	13.9326599485303	16.3224749252644	5.34265292069776e-05	0.0189996475309722	Activation
GTTTATATCTTCCAACAACG	SUT386	-9.84224542043336	4.92670776643511	16.269199857636	5.49499299618462e-05	0.0189996475309722	Activation
GGTTTTAGGGTTTACTTACT	YPL096W	9.65406991296651	8.69285071071358	16.2248416487137	5.62516319506459e-05	0.0189996475309722	Activation
GAATATGATGAAACTCCACA	YOL056W	11.0620604722944	10.4089009758926	15.9278902707606	6.5801910593657e-05	0.0189996475309722	Activation
TATATGTAGATAAAAGGAGA	YPL228W	9.20298615946745	9.4130221218888	15.9166361325148	6.61943250877629e-05	0.0189996475309722	Activation
CCAAGTCGTGGCAATAAAGG	YAR019W-A	7.27991674309573	11.8747513511604	15.9117254703694	6.63662891313373e-05	0.0189996475309722	Activation
GGTTCTGTACTTCCAGTAAG	YJR104C	7.47123108162426	10.5857050129274	15.9000896195079	6.67755552037326e-05	0.0189996475309722	Activation
GATAATTAAAAAGACCTCGG	YPL181W	8.06506694563119	11.7473042609368	15.8544719343159	6.84046945945408e-05	0.0189996475309722	Activation
ATGGTCCAAACCTAAGGTTA	YDR428C	3.75795532050731	16.2211563172897	15.8537598602465	6.84304392272518e-05	0.0189996475309722	Activation
GCAAATAAACGATCCTATCG	YFL034C-A	6.81192483449624	13.2040204468775	15.8493613431338	6.85896812880452e-05	0.0189996475309722	Activation
GATGTTAGCGTCTCACTCAG	YOL140W	-9.61204003928306	3.84742726651313	15.8015365395156	7.03453575851543e-05	0.0189996475309722	Activation
GAAATCGTTATCGAAGAAGC	YML077W	8.88996194544337	11.015837738429	15.7804338990384	7.11343551703361e-05	0.0189996475309722	Activation
ATTGGCTTTCTCTAATAATG	YDR354W	11.6975148106516	9.52001817387939	15.6827903959202	7.49026056777336e-05	0.0190699312193829	Activation
AGTATCTTACACTTCGCCAC	YGL201C	10.5311488053251	9.4889533619877	15.6777937448933	7.51007492456666e-05	0.0190699312193829	Activation
ATAAGTATATATTCAAAGTG	YHR001W-A	8.60382170069808	11.2279357293851	15.642947733266	7.64973172465888e-05	0.0190699312193829	Activation
CGTCGTCGTTGATACTTGGG	YER172C	6.70405813932619	12.2541096367856	15.5615430980178	7.98625514460711e-05	0.0194760456983049	Activation
AGAAGAGATTTATTTGAAGT	YBR288C	12.0882544504779	11.8486965741079	15.4499150183038	8.4720752506387e-05	0.0195078117890036	Activation
GCTTTCTTAAGCTCATTCGG	YLR335W	5.3869079654445	11.574380426439	15.4450094692646	8.49409414128376e-05	0.0195078117890036	Activation
GAATCGTGCTTGGGGTGCTG	YJL099W	8.97362726439167	11.2967558681745	15.4023942770094	8.6878145088352e-05	0.0195078117890036	Activation
AGCTCTCCAAGCACACGCGA	CUT607	9.31309869076633	5.97877493434223	15.400860150038	8.69487064940436e-05	0.0195078117890036	Activation
TTTTTTGGTAGGATCAGGCG	CUT152	9.93631425161829	11.7516993143294	15.3547535438711	8.90964809934602e-05	0.0195977318389144	Activation
GAGTTAAAGATCCTGTGTTG	YKL068W	7.90163844790979	12.1165722417726	15.1954614439977	9.69361189231864e-05	0.020748921446662	Activation
ACGCCGTCTCATGTGATTGT	YKL106C-A	7.2934657111791	10.9306972782004	15.1742854422372	9.80293133065685e-05	0.020748921446662	Activation
GCATTCGCTCTAGTGTTCGG	YEL005C	5.31319856130439	13.0315711420891	15.1037751450049	0.000101759586851242	0.0207595876668799	Activation
AAAATTAGTATGCTGGAAAG	YLR119W	10.9377990113357	10.1363043569528	15.0878209090104	0.000102623258109323	0.0207595876668799	Activation
GGCATCGGCACAGCTTGAGG	YDL234C	7.06279853155367	14.3241936716833	15.0693681950631	0.000103631387889577	0.0207595876668799	Activation
GGATGTTGTGCAGCAGAAAC	YMR159C	-9.41091903109667	3.39119924722168	15.0003489046205	0.000107491301043084	0.0209360521360164	Activation
GAAAAGGGACCTAATTGGTC	CUT643	5.47507237111896	11.7005783357075	14.9804647009747	0.000108629945488897	0.0209360521360164	Activation
GATTATCCAATAACGAACGG	YGRCdelta20	5.68645397297179	10.8480115911962	14.9549096939727	0.000110111167411746	0.0209360521360164	Activation
GCGCAGACTTCTCTAATCCG	YHR140W	9.22043929022973	9.94981527462868	14.8895485399081	0.00011399279817404	0.0213128534986064	Activation
GGGTAAAAGAAAAGAATACA	YDL045W-A	10.0988381232312	8.87329107167787	14.7446217012136	0.000123098165736545	0.0225318017622732	Activation
CCACTCACTAAACAAAGGGT	YPR155C	-5.64678530123913	5.8380338617867	14.6978082779651	0.000126193081394543	0.0225318017622732	Activation
CAAATTGCCCTTCTTGTGGG	YDL169C	8.22598022119496	12.3158250921523	14.6926625124358	0.000126538020237405	0.0225318017622732	Activation
CGGCTTTTGATCTGATCCAG	YGR040W	9.31246111944983	12.2922767025696	14.6164529945249	0.000131759172577683	0.0226020505440355	Activation
GAAATTAAATCGACAAACTG	YMR157C	-9.87379770136264	4.18861842285664	14.6072185627021	0.000132406387427499	0.0226020505440355	Activation
AAGTTTATTTGTATATGTTG	YDL107W	8.55877063943925	8.46259796007259	14.5866393310982	0.00013386026498217	0.0226020505440355	Activation
GAAGATAGTTAAATAGACTG	YBR037C	6.61094079073439	9.30960262098496	14.5707786739889	0.000134991744201317	0.0226020505440355	Activation
GCGTGTCAGCCATCTGTCTT	CUT420	8.3002563176518	11.4574405078386	14.4905298873298	0.000140865934692888	0.0232387361086002	Activation
AGTATATCCAAAAAATTAGT	YER074W-A	8.5403106046624	8.96112760950734	14.446191284182	0.000144221209367786	0.0233277079849911	Activation
GGTCTTTTCTTTTGGAGCGG	YDR461W	8.23138182951921	15.8427595877682	14.4037560827877	0.000147507795177856	0.0233277079849911	Activation
GTATCGCTTGAAAACAAGGG	YPL177C	-6.71177295087266	4.1519236842488	14.3693724888555	0.000150226025279591	0.0233277079849911	Activation
GCTTATTATAGCACCGTCGG	YDR231C	5.35018105341079	12.0222063356319	14.3477728054428	0.000151959349547817	0.0233277079849911	Activation
CATTTTACTTGTTTTCTTAT	YDL039C	11.4845858111501	9.15202719919613	14.322639736523	0.000154001587875547	0.0233277079849911	Activation
ATAGAAAGATAGGAACAGTG	SUT460	8.2479295149335	3.15792173261838	14.3142594605186	0.000154688670446954	0.0233277079849911	Activation
AAAAGAATCAGCTATAAAGC	YGL210W	6.46769350681676	10.691471995926	14.2895050109146	0.000156736320203849	0.0233277079849911	Activation
GAAGGTTCGATATTTACGCA	YER131W	9.78913214219194	6.10576672972382	14.2738997759923	0.000158041166594698	0.0233277079849911	Activation
GTACAGTAATATCTAGAAAG	YDL105W	9.50225912560749	11.0667806146601	14.2330780028422	0.000161506493907253	0.0234132261086464	Activation
GAAAAAGAACACTCCAGATG	SUT751	6.74946294022279	4.67517671361805	14.2181266484862	0.00016279476167538	0.0234132261086464	Activation
GCTCAGAGGAGCATCATGAT	SUT768	6.52183589363414	12.9740148189938	14.1681812571058	0.000167173760732951	0.0236164709872603	Activation
ACGCTCAAGTAACAAATGAG	YDR255C	9.45155566860922	6.99582208403414	14.1542255818849	0.000168418406042149	0.0236164709872603	Activation
ATTCTGTTACGAAAGAACTA	YLR367W	9.15395190407303	6.51314214438884	14.1082982440506	0.000172580744253128	0.0237442709113679	Activation
GGGAAGAAAACTGCTCAGGG	CUT449	7.33995329620594	10.2943777958322	14.0723369520196	0.000175912077968089	0.0237442709113679	Activation
CTGATCAAAAAGCCATCACG	YNR013C	10.3027320575194	9.56217543347745	14.0600868541161	0.000177061614368611	0.0237442709113679	Activation
AACATTTTGAAAGTACAGGA	YMR260C	10.3335797695532	9.24333047279888	14.0498937867515	0.000178023886391245	0.0237442709113679	Activation
GAGCTTGGCACTCTTAAAGG	YJL002C	6.27623213934663	10.8487956357131	14.0300443157338	0.000179912910275118	0.0237442709113679	Activation
GTGACAGGTGTACACTTCGA	YJL074C	9.6690352439573	10.1025544788228	13.9272154255678	0.00019002701426438	0.0245408482031755	Activation
TGTGACTGACAACAGATATG	YPR129W	9.00437892299531	8.25927785117026	13.9127792622419	0.000191492070691694	0.0245408482031755	Activation
AAATGAATAACGGGAAGAAA	YOR316C-A	10.5468299021134	7.70537913858637	13.8915188666086	0.000193670429898181	0.0245408482031755	Activation
AGATTTATTTTGTCATTTTT	SUT737	7.94981697594938	9.65299729695208	13.8775581923326	0.000195114414373886	0.0245408482031755	Activation
GCTACGCTAGACAACGACCG	CUT642	7.06586001237154	11.9252335138821	13.835146526769	0.000199568019304199	0.0245408482031755	Activation
GGCGGCCACCGAAGGCTCAG	CUT907	5.96096980345171	11.070709274539	13.8247861092869	0.000200671432810605	0.0245408482031755	Activation
GGAGGAAAATAATGACAACA	YOL008W	12.0475915451525	9.27476120528332	13.8151240522203	0.000201706007198013	0.0245408482031755	Activation
CTGCTCCTATATACCACTCG	YDR014W-A	8.90323479523216	5.95338263451096	13.798951734277	0.000203449713219408	0.0245408482031755	Activation
AATATCGCCAAATTTAGTGG	YPL138C	8.72107213840522	14.0857493449948	13.7633093207048	0.000207346502739423	0.0245443630917233	Activation
AACTTTATAGTTTCTAGGGT	CUT206	6.79491533848311	11.1612098711238	13.7587104800262	0.000207854741817945	0.0245443630917233	Activation
GCTACATGACTTGCCAATCG	SUT678	7.69855509972482	14.02001655752	13.7168485258553	0.000212539202358741	0.0246122134125974	Activation
CCAAGTGGGACATTGATTGG	YOR238W	10.0226345455726	15.4816598945272	13.7143924823645	0.000212817320469063	0.0246122134125974	Activation
CGATGAGAGCTTAGACGTAG	SUT083	8.18907903710418	11.4100035750802	13.6386201335558	0.000221580219511217	0.0253641520660901	Activation
GGTTATATGCTAAAATAAGT	YDR490C	-8.32852535129461	2.99331851646071	13.6092029195173	0.000225079433104451	0.0255044553592499	Activation
GTCGTTAGACTAGCCCCATG	YBR034C	7.16293220418491	10.456082770292	13.5516078247407	0.000232092518050881	0.0260361386749478	Activation
GGAAAAGATAAGCAAGAGAG	YJL116C	9.07754094965357	13.6039313036495	13.5191612710638	0.00023613993061794	0.0260758634455114	Activation
GCTTGAAAGTTTGAAGAGGG	YGR127W	6.10894801214247	11.8188308586557	13.4788717658114	0.000241264829436754	0.0260758634455114	Activation
GAATGCCAGCACAAGAAAAG	YBR260C	6.77314318316578	9.15088914740682	13.4786325613343	0.000241295589036662	0.0260758634455114	Activation
GGGCTACCGTTTAAGAATAC	YDR381C-A	5.39156935565219	11.3685716996535	13.4751450638986	0.000241744499762273	0.0260758634455114	Activation
GGACGAGAATAACTCGCTTG	SUT140	5.38608646516605	13.7131274194118	13.4528759886862	0.000244630889039926	0.0261358982214275	Activation
AGTCTTAAGCACACTAGATG	YNR034W	10.7250511995257	11.648485404399	13.4241233594481	0.000248409076214315	0.0262891794053979	Activation
GCAGCCTTAGACTGAAGGGG	SUT511	7.21180015992038	15.4460337272884	13.3933473544171	0.000252518335152708	0.0264629881940044	Activation
GTTAGATGCTAACCCACGGC	CUT188	10.0727400744192	9.8213462480893	13.3635730366508	0.000256559046033123	0.0264629881940044	Activation
AGTACTCTAGTACACAGTAA	YMR098C	-5.2007725873269	4.81099300645366	13.3570099660421	0.000257458458628202	0.0264629881940044	Activation
TAAAATCTTAGAGTTAGAGC	CUT276	6.84392991437049	4.56776190559861	13.3422897326641	0.000259487315148911	0.0264629881940044	Activation
GAGTGTCCAAGGTTTTCGCG	YKR072C	7.65046832752742	12.2120068697618	13.3249399993881	0.000261899290271016	0.0264683444888312	Activation
GGGCTGGTTACAGCAAGGGG	YNR071C	5.80988661086256	13.8878206870681	13.2854901578522	0.000267468093245461	0.0267049185663526	Activation
AAAATTTGAAAATTCTGAAT	YLR330W	9.14259368587266	12.4560587803814	13.2129154063361	0.000278026557462948	0.0267049185663526	Activation
TTCAAATGAAGTCTACAAAG	YBR198C	10.3284125683976	8.5980770015253	13.2123740742793	0.0002781068711536	0.0267049185663526	Activation
GCAATGTTTACCTTTTTCGG	CUT751	5.09084107162153	10.6735755229777	13.205599765563	0.000279113908257368	0.0267049185663526	Activation
TCGTGAAATGCACTTCAAGG	YPR148C	10.6143280277335	4.87381854479659	13.2053508863945	0.000279150975395956	0.0267049185663526	Activation
GATTCTGTAAGAAATTGGTG	YPR010C-A	7.78309845142289	10.723214077184	13.2045424452965	0.000279271415852027	0.0267049185663526	Activation
GGTGAAAAACCTGATAATAT	SUT287	7.70752950995991	10.3336568442035	13.1887064455709	0.000281641233123732	0.0267049185663526	Activation
GTAACGTTATGCCATTGATA	CUT267	-4.48492175834108	5.15647623277002	13.1547352285766	0.00028679355727023	0.0267049185663526	Activation
AGCTTTACTTAGACTTCGGG	YOR148C	7.13690118503582	12.0785262749484	13.1523158112075	0.000287164108304351	0.0267049185663526	Activation
CACTCCACCAGCTACGAAGC	YML006C	7.1962436535307	11.6805261357019	13.1465731927094	0.000288045564853687	0.0267049185663526	Activation
GAAGGCCCAAAATGATTCCG	YKR050W	8.21806167914817	11.5178185393322	13.1106031891007	0.000293629131158785	0.0268436187498212	Activation
TGTCCCGCACCATTCAACGG	YLR414C	9.95032052484999	13.0798813189885	13.1061532547683	0.000294327429686933	0.0268436187498212	Activation
ACACAGGACCCTTAAATCGG	YMR084W	7.85038242886762	10.4144603915534	13.0886716946812	0.000297086940727492	0.0268767846861372	Activation
AATTTGACATGATATTAACG	YLR151C	6.95143902802278	9.67096420899397	13.0333336859272	0.000305995364213599	0.027203432124025	Activation
GGTGCATTCTTTAAGAGATC	CUT262	5.54577562754714	10.4050359278346	13.0305229232769	0.000306454967012691	0.027203432124025	Activation
GGAAACAATGTCCTATCTGT	SUT419	10.3981780264066	10.2628760523702	13.016748644308	0.000308717355837068	0.027203432124025	Activation
GATTATACCAAACGAAAAGG	YBR233W	8.89146596652636	9.58304422209115	13.0065849041053	0.000310397513984239	0.027203432124025	Activation
AGGGCTCGTAAAGCAAAGCT	YPL263C	7.70520902820148	11.9329931853433	12.958379351552	0.000318492766657641	0.0273712486201333	Activation
AAAACTAACCGTGATATACG	YGR030C	6.54415267296376	11.7476601314116	12.9516193208136	0.000319644887196771	0.0273712486201333	Activation
GGCCTTGGTCCGTAGAGACA	YMR073C	8.79470799570351	14.6632775098827	12.9468767403138	0.000320455678607779	0.0273712486201333	Activation
GCACTCCATGCACTAACGGG	YDL191W	5.76057539259579	12.0662637766317	12.9241074453188	0.000324377289534044	0.0273712486201333	Activation
GAAGTTACAACATCTTTGTG	CUT322	8.00228389947524	9.00716115189687	12.9233300098959	0.000324512040156689	0.0273712486201333	Activation
ATTCATATTTGAGCTGGTAT	YBR139W	9.00051277488094	6.54962010337402	12.9001709832396	0.000328552117277924	0.0275052063554011	Activation
GAGTAAAAAGAATAAAGGGC	YGL080W	6.55899559161258	9.26340171481858	12.7859795780806	0.000349226847614071	0.0290194576039603	Activation
GATTGAAGATATTAAGGAAA	YER140W	7.52015615833432	10.4227073397761	12.7526551991002	0.000355504137041362	0.0293238633038971	Activation
GGCAAAATACCATGATATGG	YHR133C	5.87056739248007	10.1501997465262	12.7262491905806	0.000360558940346179	0.0295237240350616	Activation
GAAGCTCCAAGCCAAAGGTA	CUT727	8.37274611783516	5.31910698301399	12.7049815131145	0.000364682792203937	0.0296450113256794	Activation
ATATATATTTAAAAAGTACT	CUT158	7.00301439495303	12.4992341237927	12.6833567876844	0.000368924660774224	0.029774078018455	Activation
GAGATGCGTATACTTATGGT	CUT480	6.80814572410235	8.65439564302222	12.6512555482556	0.00037531353933591	0.0300733377447874	Activation
ACTTCGTGGGCCTAAGAAAA	YLR165C	10.1973349941534	12.7154237226296	12.5892743051648	0.000387966753648138	0.0303458378704561	Activation
GACTGCTTCCTCGAAAAACG	YOR386W	7.11852188326359	11.8802940699178	12.5813775006704	0.000389609463095212	0.0303458378704561	Activation
GCTTAGTACCGTGAAAATCT	YKL172W	8.08897065585129	10.8533276220273	12.5724588192105	0.000391473184302481	0.0303458378704561	Activation
GTCTGGCTTTCTGGCAAATG	CUT848	-5.56385479729721	4.79974280312375	12.564446017654	0.000393155273907119	0.0303458378704561	Activation
GAAGAACAGCTCCTAACCCG	YER178W	6.85020578895306	9.52546928011387	12.5381511271812	0.000398726630191093	0.0303458378704561	Activation
AAATAGCACGACCAAACGAG	YDR349C	11.6197895448718	9.94608860823467	12.5283449469571	0.000400824692590467	0.0303458378704561	Activation
AGCGAAAATGGATAAAACGG	YDL100C	-5.03172751870483	5.5090792054235	12.5247284485475	0.00040160126154401	0.0303458378704561	Activation
TTATGTATACCTCTTCTCTG	YLR356W	10.5851011266018	15.863817516819	12.5207304969748	0.000402461506285865	0.0303458378704561	Activation
ATGAGATGATCATTTCTTAT	YMR131C	9.18491990702518	9.93082568146583	12.5082644185342	0.000405155803164042	0.0303458378704561	Activation
CTGTTGAAGTACGCAATTAG	YDR390C	10.2152522537676	9.04419157230685	12.5020999720922	0.000406494843098012	0.0303458378704561	Activation
GCCTGACTAGGGGAAGCTGG	YNL138W-A	-6.47909379850977	4.2825343836656	12.4783385373734	0.000411698205288874	0.0303458378704561	Activation
GCACTACTGGATAATTACTC	SUT428	7.82673018477917	11.2882376177484	12.4695859344154	0.000413631771316717	0.0303458378704561	Activation
GAGAACTCCAAAATTCAATT	SUT093	9.13920561960609	10.1649728586438	12.4684623188009	0.000413880655569601	0.0303458378704561	Activation
ATAACTAATAATATCTATAT	YFL007W	12.008172255619	8.89784350826741	12.4428359229251	0.000419598180650738	0.0304024358754484	Activation
GCCCTAGGAACGCCATTATG	snR81	7.3890681941856	11.0849836041634	12.4407241489629	0.000420072879363032	0.0304024358754484	Activation
GGGATTTCTATCCCTTGCGA	YGR248W	7.67844204021562	10.7327038933325	12.4201233265302	0.000424732190424238	0.0304139046934579	Activation
GCGTGTGACGGCTCAGAATA	YOR231W	8.95767221337852	10.235247531704	12.4127679954319	0.00042640835638977	0.0304139046934579	Activation
GCGATAGATTTCTTTGAAGC	YML023C	-5.33131808863076	4.97758921852558	12.4042193216367	0.000428364854837435	0.0304139046934579	Activation
GAAGAACGTCTTGCCTAGTG	YLR052W	7.87993141170463	10.5114613288222	12.375381239496	0.000435031967341106	0.030665550045079	Activation
GAACCGGTCCCGTGTGTGCG	YPL004C	7.39103161068715	11.8751687729663	12.3653466087765	0.00043737636006531	0.030665550045079	Activation
CTGTCAAGACAGAATTCAAG	YPL119C-A	7.79132126588696	9.88414706440746	12.3475043740992	0.000441576375475174	0.0306690644757314	Activation
GTTTTTAGGCTCGAACGAGC	YNL234W	4.92429293806183	12.0858784675466	12.3337882950833	0.00044483275333809	0.0306690644757314	Activation
AACTCAACAAGAACTAGAGG	SUT486	-10.1277819287958	4.35947606367216	12.32088913779	0.000447917290727853	0.0306690644757314	Activation
GGGCTAAACCGGAAGCCGGA	YDR322W	7.96304626639501	10.0453043657563	12.3190361992563	0.00044836214779996	0.0306690644757314	Activation
GAGTACAAGCTAGTCGTCGT	SUT333	7.14099036427896	10.2383778182843	12.2787322605712	0.000458149486339139	0.0309115510458818	Activation
GATAACTACATGGATATGCT	YLR017W	9.5575118040522	9.74495619135359	12.2620326615939	0.000462267699798869	0.0309115510458818	Activation
AGCTACTAAGAACAATGGAG	YGR217W	7.2704799540008	4.54509756280924	12.2618187502595	0.000462320693125986	0.0309115510458818	Activation
AGTTTATCAAGTATGACCTG	YPL012W	7.00222794789697	7.46439575543439	12.2593639496608	0.000462929272215025	0.0309115510458818	Activation
GCCCATGGGAGAAAGGCTCG	YNL178W	-5.98490447071263	4.25431409234647	12.2413279880849	0.000467425497914789	0.031027096068687	Activation
GAAAATTGAGCAACGTACTC	YOR244W	7.61156656424274	9.31573624149302	12.2135061643707	0.000474447849347881	0.031307976317556	Activation
GCAAACAGTACGCCTTAGCG	YJL190C	5.71530955460136	11.3917163404687	12.1777119710049	0.000483639317806662	0.0315855694634113	Activation
TGCGCCGGGTGGCATATGGG	YJR120W	6.05445137832795	11.7046708564796	12.1752203398777	0.000484285786031979	0.0315855694634113	Activation
GGATCAAGTTCCCTCCCGAC	YLR422W	5.94377850109142	11.6867383633345	12.1300877416875	0.000496147855350576	0.0317830961398177	Activation
GATAAAAATTGCATATATGT	YBL029W	5.35223006498233	10.5853922738711	12.1289374401094	0.000496453988190595	0.0317830961398177	Activation
CGCCGCTGTAAAACTATCAC	CUT239	9.53078510172612	12.91310700598	12.1235656563502	0.00049788612131259	0.0317830961398177	Activation
GAGACTAAGTTGTAAAACTG	YJR010W	5.00792322408056	11.1978312420103	12.12071706094	0.000498647256249592	0.0317830961398177	Activation
AATACTACTATATTTTACCC	YHR182W	7.36952102348909	7.34478048921732	12.0852322987758	0.000508227688354839	0.0320070550202924	Activation
GAGTATATAAGCAGAGCTTG	YPL111W	4.96466972952242	11.4863729035144	12.0797899550451	0.000509713396949219	0.0320070550202924	Activation
GGTCTTATGATCCTTGGTAC	YDR376W	5.86555359681581	11.0078592244414	12.0761098126123	0.000510720524927111	0.0320070550202924	Activation
CAGCATTCAACAACGTGAGA	YIL135C	11.837717981373	10.1814479572053	12.0557845104425	0.00051631915082401	0.0320241095371669	Activation
GCCCGTTTGGGCTCAGCGCG	YML058W	4.41176447606668	11.6882813985615	12.0462689163753	0.000518961481901669	0.0320241095371669	Activation
AAAATTGAGCAGAAAAACTC	YMR113W	7.21474494897385	10.0374737835156	12.0441318795584	0.000519556778014297	0.0320241095371669	Activation
GTGACGCGTCACTTCAAACG	YER111C	5.77685035787044	14.1503033570117	11.9823859437313	0.000537057762281963	0.0328646030418997	Activation
ATCGTAAGAACCTATTTAGC	YPL214C	9.6528978259358	11.0162149838187	11.9739157474792	0.000539504495552102	0.0328646030418997	Activation
GGAAGTTTATAAAAGAAGTG	YBR120C	-8.61897507625937	3.04090998061412	11.9653792185351	0.000541981775962867	0.0328646030418997	Activation
CAAAGAGGAAGCCCGTCACG	CUT571	9.79852277060029	12.8700518751725	11.9417555912046	0.000548897325552718	0.033105001064787	Activation
GAGCTTCGCTGACACGTGGG	YDR281C	4.36227082441307	11.2929117550617	11.9288193980714	0.000552721927701903	0.0331574041976468	Activation
GATATCCGAAATACTGGACC	SUT073	8.51883750538911	11.0672743375959	11.9077394001077	0.000559011987162644	0.0331939249139951	Activation
GGCTTATTATGATCAAATAG	YCR083W	7.57865704272506	16.7623511361814	11.9069508147487	0.000559248690385548	0.0331939249139951	Activation
GAAATAAAGAGCGGGATAAA	YIL031W	7.93457204298606	6.6053936041255	11.8848235583609	0.000565931864387286	0.0332564840012435	Activation
AGGGTTACCAGTAATTAACC	CUT859	13.1520061781754	11.0154460371892	11.8838366672288	0.00056623180996947	0.0332564840012435	Activation
AGAAATTCTAGGCAGAGCCA	YOR096W	6.25929576459714	10.048885356401	11.8701016555488	0.000570422989028468	0.0333281515152154	Activation
AAGTTATTTTACTCAGTGTT	CUT743	7.17141954338227	10.5987923229563	11.8401201177221	0.000579680865460297	0.0335061023551177	Activation
CAGGGAACCTGCAAGAATGG	YDR519W	6.69958143532337	10.6819682344515	11.8287072180845	0.000583244745820533	0.0335061023551177	Activation
GTACCCAGAAGGTGCGTGGA	YBL090W	-9.86711758748822	3.67448507828706	11.8163794393071	0.00058711917382117	0.0335061023551177	Activation
GGCTGGACGATCCAAATGCG	YCR009C	8.11008686494057	14.152574773721	11.806280399256	0.000590312502384053	0.0335061023551177	Activation
GAGCATTTAGCAATTGTACA	YHR065C	7.63513957510609	8.51538133845687	11.8046774721546	0.000590820960129142	0.0335061023551177	Activation
GCGCCCGTTTCCCAATAGGG	YMR251W-A	5.27032105600228	10.910288548244	11.8027870845089	0.000591421170344872	0.0335061023551177	Activation
CGTATATGTTGCGGGTATCG	YOR382W	11.2866697403762	9.87830266846434	11.7935076474597	0.000594376392286363	0.0335061023551177	Activation
GGGTAACTAAAATGGGTGGG	YMR207C	5.3731835445862	10.9661641458444	11.7701705929656	0.000601874620235975	0.0337591474490358	Activation
GGCTTCCAAAGCCCTATTGG	YGR229C	-8.28208718964942	2.61417759228818	11.7391351948504	0.000611994543772845	0.0339609565763796	Activation
GGCCACTGAACTGCGTGTGT	YBR172C	7.35185934030336	6.43242146246926	11.7317958077193	0.000614412765043952	0.0339609565763796	Activation
GGAAACTGTAACTAGAGAGC	YGL157W	4.98727576306196	10.481820413671	11.7313660555452	0.00061455466081343	0.0339609565763796	Activation
GAAATCGTCTTATCATTATT	YPL089C	5.4312875812034	11.4019540718059	11.6660060952714	0.000636525110741585	0.035002640648525	Activation
GGGAATATATACTTACAAAT	CUT409	5.88744024916033	9.76555561310255	11.6515375337593	0.000641494923396565	0.0351038539056715	Activation
GCCTCAGCCAGAATTTTCAG	YGR123C	6.24756471936775	11.3072653313891	11.6182693101899	0.000653071418371523	0.0352754816773386	Activation
GCCAAGAATGCCCCGAACAG	SUT251	6.3039057024164	9.89561559063823	11.6168763646755	0.000653560704175313	0.0352754816773386	Activation
AAACGGAAGTTTTCATGTGT	YER016W	5.37498863587902	7.22237314573376	11.6045320056528	0.000657912993660604	0.0352754816773386	Activation
AAAAATACATCCCATCAGGT	SUT195	-9.58427385156597	3.87534485684043	11.6002524928096	0.000659428658799024	0.0352754816773386	Activation
CGGCATTAATACCTGAGAGC	CUT009	5.7972190117991	12.3037361416228	11.5976446586905	0.000660353998238643	0.0352754816773386	Activation
GCGAAATTGAGTGCGCTAGG	YLR046C	-4.4312088749866	5.75807889410665	11.5834007519447	0.000665431367466385	0.0353782420864356	Activation
GCAAGACTAGTGGCCTGGCG	YDR389W	4.69512164191028	10.9620907389989	11.5512313967047	0.000677044007025116	0.0356005847111749	Activation
TAATGGCATCGGAGGCTCGG	YAL054C	9.30469523526457	7.47114508567345	11.5390769081671	0.000681484685350065	0.0356005847111749	Activation
GCTATTTAATTACAATTCTT	CUT559	5.98945472177804	10.0640230881585	11.536937523382	0.000682269355546348	0.0356005847111749	Activation
GGAAAGAATCGTAGTTAAAT	YJR133W	7.98429021818891	6.67923391990637	11.5286575900202	0.000685314828690167	0.0356005847111749	Activation
ATTCAAGAACAAAAACAAGG	YFR011C	13.8826041377405	9.30944797911818	11.5209790565492	0.000688151370055345	0.0356005847111749	Activation
GAGGTACATAGAAGTTTGGG	YPL120W	5.5183750842905	12.2236359950257	11.5196202512753	0.000688654562517824	0.0356005847111749	Activation
TATCTAAGAATAACGGTCAG	CUT213	8.60988903441059	5.47546037073714	11.4716925280737	0.000706642954586101	0.0363629388281967	Activation
AATTTCCAAGTGGTAGCAGG	SUT069	-6.32355817493408	2.79488169745756	11.4570768082714	0.000712222470963668	0.0364014189510707	Activation
AAATTATAAAGAAAAGAAAT	YGL231C	-8.10324795235126	2.6560496548476	11.4527556696636	0.000713880564203562	0.0364014189510707	Activation
GCTGCTTGTGATGTTTTCCG	CUT765	9.03754792932517	15.5530522078326	11.4009959779772	0.000734047408918995	0.0369379495273926	Activation
GAAGCATTTGCTCTAAGAGT	YEL024W	8.46575576921982	9.65705551515681	11.3993469844564	0.000734699273755057	0.0369379495273926	Activation
AGTCGTTCTCCCAAAAGTCA	YHR135C	-8.51269862846178	3.95986633602245	11.395210838843	0.000736336911049562	0.0369379495273926	Activation
CCCATGTCCCAGCGATAAGG	YBL075C	6.26367351500394	10.8750937502402	11.392093503537	0.000737573604397926	0.0369379495273926	Activation
AGATTACTTTGCAATGCAAG	YPL025C	7.9617462924205	9.92612187526731	11.3786116963394	0.000742946247806938	0.0370416489239921	Activation
AAATAATATACCAAGTGACA	YDR130C	-10.1047746703442	3.96607289430081	11.3548336937871	0.000752518594023877	0.0373528919812383	Activation
GGCTTCACCACAAGGGTGTG	SUT024	5.0204321597627	11.4512827746677	11.329038316065	0.000763044072849288	0.0376912556873272	Activation
AGCATGAAGCTCTTATGATT	YLRCtau1	5.24447978822582	11.7331776737653	11.3217250982678	0.000766055116483384	0.0376912556873272	Activation
ACAGTCATCGTTGAAAACGA	CUT630	5.28641808423084	12.7234122030616	11.3089184672189	0.000771356893940884	0.0377516521945796	Activation
CCTCCTCGGCAGGAGTTGGG	YDR246W	5.34708925312683	11.1384473507355	11.2972739171727	0.000776209763855136	0.0377516521945796	Activation
AAAAATCATATTCTTATCTT	CUT586	7.02032119369423	8.86362545302648	11.2944805814595	0.000777378468260643	0.0377516521945796	Activation
TTTGCTTTCGCCGTTCGGCG	YLR312C	7.87592084985792	14.7800682689486	11.2695924649431	0.0007878702345564	0.03802477661642	Activation
TAAATTGGTTTAAAGCGAAG	YPL077C	9.9938600060347	7.44615710876322	11.2650938709011	0.000789781864113555	0.03802477661642	Activation
GGACGAGTTACAACGATGCG	YDR130C	7.33535820945919	10.3502130498697	11.1976304093063	0.000819018534839019	0.0386870931786881	Activation
TCTTCCGTCGTCAGATCGTG	CUT854	6.93554046613145	9.12319189678419	11.1882693211641	0.00082316088126685	0.0386870931786881	Activation
GGTACCATATACGAAGATCG	YML007C-A	-9.00337891527119	3.85110230974075	11.1811214316183	0.000826338123704591	0.0386870931786881	Activation
GCCTTTGGCACTGATAGTTG	YDR275W	4.65810108802355	10.7599831309601	11.179984166945	0.000826844780405272	0.0386870931786881	Activation
AACAATTTTGACTACGTCAA	CUT505	8.55714440447029	12.7158843866889	11.1761559421799	0.000828552580718784	0.0386870931786881	Activation
TGGCTCCCGAGCTAGATGAG	SUT593	5.47403472361946	10.1957432777105	11.1759690459588	0.000828636047764123	0.0386870931786881	Activation
AAGAGAAATTGTTACCTATA	SUT711	8.68565995957767	6.64326488774049	11.1744206252297	0.000829327892718714	0.0386870931786881	Activation
GGAAATACCACACAGACTGG	YGL031C	7.16867635064991	12.1315722818015	11.1663305983382	0.000832952076849225	0.0386870931786881	Activation
GAATGTAATACCACTAACAG	CUT184	8.30398876517188	9.01807857970343	11.1548155867844	0.000838138217168685	0.0386870931786881	Activation
AGGACCCTATTTCTTCACGA	SUT643	10.9098224304971	12.9494960727084	11.1438229872244	0.000843119521016039	0.0386870931786881	Activation
TGTTAGAAATTTACAGATCG	YGR040W	10.1157869569147	8.70094620699386	11.1322013832518	0.000848418405027542	0.0386870931786881	Activation
ATTTCTAGCAACAGTATCAG	YER153C	9.98208640742087	10.7429181885209	11.1219758661117	0.000853108574635213	0.0386870931786881	Activation
AGGTATCATAACAAGAACAG	YGR071C	-9.84312620532732	3.73501224933759	11.1197477922928	0.000854134004549359	0.0386870931786881	Activation
GAAGCGCAAATTGAAAAGTC	YGL255W	8.70507089806768	7.22884460501221	11.1195632775073	0.000854218979916978	0.0386870931786881	Activation
AAACACTAGCCTATGCAAAG	CUT632	8.474678761732	8.93275680838594	11.1172864523687	0.000855268239286384	0.0386870931786881	Activation
GTCATTAAGACAACAAGTGC	YML116W	5.66877461738566	11.660266739591	11.1079573445171	0.000859581117550823	0.0387260280188158	Activation
GCTATTTCCTGGGTTTTCTG	YML089C	5.58537588980694	11.4625638608626	11.0860341153608	0.000869803037918525	0.0390135624560232	Activation
ATCCTTTTGAGTGCCGGACT	CUT178	-5.55229278718126	7.01075159237007	11.0794032178969	0.000872918896101071	0.0390135624560232	Activation
GGACAGTGATCAAAAAAGGG	YDL160C	5.19950005509882	10.7835925253213	11.0641244699123	0.000880141399050297	0.0391802627561358	Activation
GCCATAGAAGCCGTGAGAAG	CUT653	5.89254594600756	11.6063558469841	11.0539525085006	0.00088498331173802	0.0392400900833087	Activation
GCTGTATATTTATTGTGCTT	YLR409C	8.51149246223959	11.1823885587695	11.0454012555044	0.000889074585895599	0.0392433374457314	Activation
AATCCCTATTTTGCCGCCGG	YDR376W	9.2443301422287	5.90091414614366	11.0392009050171	0.000892053044095339	0.0392433374457314	Activation
AGTGCCCTAGCTTGAGAAGG	SUT154	-4.76466727910156	3.95008907282796	11.0293056694251	0.000896827321030222	0.0392992534660822	Activation
GTGGGGGCAAATAATAACGT	YGR045C	9.67926501657309	12.2167419914823	11.0183023383958	0.000902166574508953	0.039379395458527	Activation
GCGTTTCTTCAGGCGCTCGG	YOR084W	9.11361786846674	12.586548463572	11.0106133187354	0.000905916655691675	0.0393898179982528	Activation
GTCGAGCTCTACTTAAATTG	YCR024C	7.0236418160728	9.97566723534839	10.9925367309819	0.000914795147699667	0.0394166619049558	Activation
GACATCTTCAAAGAGGACGT	YOR353C	10.5464176136248	9.99162143231012	10.990441168366	0.000915830077681993	0.0394166619049558	Activation
AATTTTTCAGAAATGGTGCA	YCL037C	-9.40226752912634	3.24664663552712	10.987923322137	0.000917075125440672	0.0394166619049558	Activation
GGAGGATATAACACAAACAG	snR63	3.67875753903328	17.0275578846628	10.9722872905721	0.000924845377623719	0.0395989139167285	Activation
CTGGCTCTAATATATGGTTT	YIL165C	9.139970137285	7.37261873663359	10.9577325973439	0.000932138073583968	0.0397594103021481	Activation
GGTCAATTACAGTATGTATA	YHR026W	6.12803891407693	9.70746710453462	10.93901121321	0.000941604071668203	0.0400110396817193	Activation
TGGCCCGTGTGGGTTAAGGG	YIL136W	6.53580997503669	10.8711947817946	10.9295284565251	0.000946435813759561	0.0400645922971878	Activation
AGGCCATTGGATACAATACG	YGR271C-A	9.06304013813747	7.14853107043257	10.9078783858117	0.000957561327892	0.0403831690838062	Activation
GAAACCTGGATGATAAACCA	CUT704	8.20098657196816	9.18285715899587	10.8868090585153	0.000968515377798687	0.0406921554612197	Activation
ACGCCAACCTACAGAATCAG	CUT896	7.02590667997279	9.92747404989222	10.8793667601495	0.000972414877260639	0.0407035451235442	Activation
CGCATTTCAACCTCCGATGG	YOR221C	6.18309503022656	10.7501656900467	10.8343012999483	0.000996369086322684	0.041430334028594	Activation
GGAGAACTGAAAAACACATG	tK(CUU)K	7.03353260253793	12.0025783627605	10.8291559767696	0.000999141729580171	0.041430334028594	Activation
GGCCTAAAAAGCATAATAGG	YGL178W	6.68180796581431	9.0773680097661	10.8227024593936	0.00100263034844972	0.041430334028594	Activation
GTGCGACCCGGTGCGCCGGG	YJR120W	4.36946414368453	10.5067189359396	10.8176092799466	0.00100539229604087	0.041430334028594	Activation
TCCTCGATTTTGAATTACTT	CUT824	11.5294287160554	14.7207549792716	10.8123654105925	0.00100824399980443	0.041430334028594	Activation
CATTGACATCAGTAGTGTGC	SUT575	8.65134406499049	9.27520492581137	10.797818903185	0.00101619752698435	0.0415353320700134	Activation
CACAGAACACAGAATGAAAC	CUT461	10.9007031245813	11.4969969751444	10.794166751903	0.00101820434295362	0.0415353320700134	Activation
CGAAGTTCTTCCATTTACGG	YLL056C	6.23891812627612	10.7774047626858	10.7768824631081	0.00102775637276418	0.0417730832959005	Activation
TATAAGGATCTTAAAAATCT	YML059C	6.85483411151727	8.98874925082048	10.7460179631041	0.00104503940384738	0.0422040828212727	Activation
GGCATGCTTTTTAACAAGCG	YPL100W	5.12896582236423	12.1004925501721	10.7310207609421	0.00105354313441336	0.0422040828212727	Activation
GGATTTCAAACGGAAGGAAT	YNL237W	7.36478509918747	12.4577131147047	10.7293528471698	0.00105449319122279	0.0422040828212727	Activation
AATGAATCCGAAAAAGTACC	YGL091C	9.05467089018713	9.77222812503146	10.7261127519795	0.00105634125238343	0.0422040828212727	Activation
GTGGAGCATTAAGCCTACTG	YGR252W	-9.07670755102502	3.95471887085311	10.7246594023478	0.00105717126696181	0.0422040828212727	Activation
CGGCTTCAGCCTTAAAATTG	YMR312W	4.59894833996535	10.3954863168378	10.7064032416251	0.00106765380453998	0.0422220968990544	Activation
GAACTATGTGTTCAAAAACT	SUT287	5.17432966500268	11.0781167059107	10.6979734529165	0.00107252954049436	0.0422220968990544	Activation
AAGCATTGGAGCCGGCACAT	YGL141W	8.38273031172163	7.64141574084972	10.6944402801817	0.00107457979746984	0.0422220968990544	Activation
TAATATTTAACACGTTTACG	YGL120C	8.70742756340796	11.6888214237343	10.6943493386395	0.00107463262203705	0.0422220968990544	Activation
GGAAAAATATCAAAAGTACG	YDR129C	5.25313806038871	11.7554257685146	10.690124645872	0.00107708948675931	0.0422220968990544	Activation
GTTCAGAACAAGAAATGATA	YML050W	10.2709309524005	9.55648525634174	10.6785880268502	0.00108382757455972	0.0422220968990544	Activation
AGTTTCGAGAGCAACCCCAC	YMR319C	-9.58410939779945	3.60996748026112	10.6750697049323	0.00108589096130516	0.0422220968990544	Activation
AATCAATTGCTTACCAGCAC	SUT573	7.23368711893238	14.4846729786742	10.6719349395707	0.00108773275127712	0.0422220968990544	Activation
GTTTTTAGCAAACTTACCAG	YLR233C	7.91099878519109	10.1318250831409	10.6537696893416	0.00109846788861591	0.0424508590421088	Activation
TCACTTAAATTGAACTTAGG	SUT474	8.81053296394787	8.64524472458732	10.6442493528373	0.00110413687245379	0.0424508590421088	Activation
GGGTGAAGCAGATAAAACCC	YOR348C	-7.5455659585849	3.47666154086541	10.6428398608999	0.00110497868071811	0.0424508590421088	Activation
GTAACTAATGCATTTAACAC	YKL115C	7.53039659707293	10.9168153732061	10.629254188401	0.00111312598301505	0.0426179087968016	Activation
GGAAATAATATATGAAATAC	YDR017C	5.44580639230711	11.4787128807834	10.6108739725598	0.00112424538285575	0.0428972268873329	Activation
AAATATTTCCGGCCTTGTAG	YBR120C	8.6775566237847	8.53019497086653	10.5938680343601	0.00113463345944182	0.0431468411797232	Activation
GAGAGAGGACTTTGAAAATG	YOR195W	-8.99094063861512	3.10526570684369	10.5721259334341	0.00114805620138907	0.0435097786053467	Activation
CATCACCTTCCTCTAAACGG	YLR024C	7.47027834228215	8.47729355126151	10.5461104519512	0.00116432848293814	0.04386439008035	Activation
TATTACATGAAATATATTTC	YDL175C	9.88596180475323	9.0050126911058	10.5404859838293	0.00116787706894515	0.04386439008035	Activation
GAGCATCACTTGCATTTGGA	YNL141W	9.45350517490054	8.47819596817908	10.5384827709026	0.00116914357586242	0.04386439008035	Activation
ATTCTTAGAATTCAGTTTAT	YIL073C	6.10310454440759	10.2446069269368	10.5153377064919	0.00118387794123641	0.0440814021521445	Activation
AAACAACGTTAATATGAACC	YGR223C	-9.04058673352105	2.8883267113732	10.5127217304094	0.00118555507123707	0.0440814021521445	Activation
AAATTATTTAAATCAAACAG	YPL213W	8.09246184798916	9.87584031397584	10.5065613587486	0.00118951405365056	0.0440814021521445	Activation
ACTATTCAATTTTATTCGAG	YDR132C	7.91747452839031	7.01248106671896	10.504804081307	0.00119064582386341	0.0440814021521445	Activation
ATATTAAAGGTTTATAAACG	YHR182C-A	-10.504979618015	4.24782089708851	10.4812051636339	0.00120595064590353	0.0443758414947131	Activation
GACGTTTTACGTCGATGTTG	YBR214W	5.82279241807939	11.2422561702634	10.4714585985026	0.00121232962224425	0.0443758414947131	Activation
TCACCTAATTCGGCGTTGCG	YLR041W	8.68716260646995	5.99911607208682	10.4680548099039	0.00121456538456293	0.0443758414947131	Activation
GGATAAGGTAACTGCGTATG	snR3	8.57106607436962	12.4540230935733	10.4654263999771	0.00121629469764903	0.0443758414947131	Activation
CGCTCTTGACGAATTTTAGG	YOR236W	5.79110229176775	11.2278392591342	10.456824542902	0.00122197156775373	0.0443758414947131	Activation
ACTTTTATATAAGTTATACG	YOL011W	6.0141874523438	6.19064306707686	10.4535802069988	0.00122411965227368	0.0443758414947131	Activation
AGAATTAGAGTTAAAATTGA	CUT529	5.54622567540774	7.59992547431404	10.4458673875181	0.00122924168635148	0.0443758414947131	Activation
GGTATTTGTCAGTCATCTGG	YPL066W	6.86027076066778	9.93519710197915	10.444360623912	0.00123024484799927	0.0443758414947131	Activation
CTAATAAAAGGAATTCACCA	YOR116C	8.96878101817341	8.2612138550785	10.4322326403665	0.00123834955548657	0.044430255139497	Activation
TCCTTTCGCGAAAATTCGCA	CUT915	7.64908674589042	14.8610512041335	10.42954147126	0.00124015528263722	0.044430255139497	Activation
TGCCAAGAGGCTGACTGCTG	YPR144C	5.37451401501854	9.39202590398938	10.4243662775996	0.00124363523924069	0.044430255139497	Activation
GGATCATTACCTGGACAAAG	YJL062W-A	-5.1155463932827	4.80308192264496	10.4175083430957	0.00124826195140012	0.044453976415259	Activation
GCGGAGCTCACGAAAAGGGG	YMR105C	5.26998099543314	11.6068790822704	10.4042869638496	0.00125723099227938	0.044631700225918	Activation
GTGTCTTTTATTCGAAACTC	CUT490	7.77905034111459	8.06999075259561	10.3806245852526	0.00127344608232383	0.0448011185860631	Activation
GAGAAAAAAGTATTACCCGG	YNL308C	6.3463531897867	8.92114009462604	10.3771799884622	0.00127582414237116	0.0448011185860631	Activation
CTGTTTAGCAACCTCTTTGC	YBL054W	6.20963082436991	11.027918385368	10.3724015803149	0.00127913047517549	0.0448011185860631	Activation
TGTTTCTGTCCTGCAGCGCA	CUT678	8.87623230448571	11.1372143425521	10.3706200966713	0.00128036535855888	0.0448011185860631	Activation
CAAATCCGAGATCGATTCCG	SUT830	-6.88451232744316	2.47958689456135	10.3683052671484	0.00128197174773812	0.0448011185860631	Activation
TGCATGAAGTAAGCAGAACA	YER045C	8.47791347235042	6.57823954391959	10.3335134777201	0.00130636293018738	0.0454074642574585	Activation
CAATACCCCCTAAGGAACCC	YER008C	7.69067441123902	10.3718854137837	10.3275613067303	0.00131058258097821	0.0454074642574585	Activation
AAGTAAGGTTATCAGAAGGG	YNR041C	8.9726355771784	8.49291251225412	10.3263185253305	0.00131146536097491	0.0454074642574585	Activation
ATCACATCCGTTCCTAAACG	YPR055W	5.03474017184846	10.1027864441958	10.3031609825292	0.00132802531359539	0.0457618482286604	Activation
CACTAAACCCGAAAGAATCT	CUT097	10.5972304084915	10.3061147491264	10.2969874906266	0.00133247560326283	0.0457618482286604	Activation
GATGGGCACATGGTGCGGTG	YNL149C	7.94106995503177	12.3851836838667	10.2939096496304	0.00133469996497092	0.0457618482286604	Activation
AATCTTTCGGTGTCACATCG	YKL188C	-10.3341544710992	4.12971540653601	10.2869782653743	0.0013397230639704	0.0457618482286604	Activation
ACAAAGATTTGTTTTACATC	YKR058W	5.57712816954624	9.96658747328577	10.2771852430625	0.00134685259773049	0.0457618482286604	Activation
CATAATTTTATTGAATGGGC	YOR319W	-9.31976566760901	3.83204532425183	10.2673071809639	0.00135408295444956	0.0457618482286604	Activation
GCAAATAAAATAGTGAATGT	YDL045C	5.12165246606693	9.13179108951832	10.2642094926181	0.00135635842502242	0.0457618482286604	Activation
TGTTGCCTCACTACAAACCG	YGR062C	8.6848014577526	6.46346805132164	10.2623891099255	0.00135769742989851	0.0457618482286604	Activation
ATGGCTCGCCAAAATTTTTT	YMR189W	-7.89897424276782	2.7657154657078	10.2563762958549	0.00136212974653066	0.0457618482286604	Activation
GCTAAAAAATGTTATACATT	YGL016W	5.01067071162121	10.2911361135052	10.2558830824503	0.00136249396580251	0.0457618482286604	Activation
AAGCACTTGTCATTTCGCCT	CUT598	10.0987512487186	8.58006437228461	10.2398160626735	0.00137441292112702	0.0459051001691944	Activation
AAGTTTTTTGAGGCTATTAC	YPL176C	8.18279746218311	12.972568433803	10.2357713597904	0.0013774299879973	0.0459051001691944	Activation
GTATTTGTATAGTAGGGAAA	YIL056W	8.75969930565649	7.03462489899303	10.2288205389158	0.0013826304873864	0.0459051001691944	Activation
AAAGAAGGTTAATGTGGCTG	YEL021W	9.68656843827677	9.7843499562775	10.227182229117	0.00138385913810618	0.0459051001691944	Activation
ACCGCCTTGATAGGAAAGAG	YPL219W	7.58072970666667	10.8382513293625	10.2227088873569	0.00138721955405214	0.0459051001691944	Activation
GTATGTATGTTTTTGAGTCG	YNL270C	10.5978172227335	12.2485300285978	10.1938454871694	0.00140910153921892	0.0464920619616407	Activation
AATAGTAAAATATTTCAACT	YPR174C	6.70949341876483	9.08555141450014	10.1855822589685	0.00141543018724505	0.0465629263599804	Activation
AGAAAACCATACTAATGCTG	YNL113W	9.71461854312012	8.23734291275826	10.1750665679559	0.0014235255875372	0.0465629263599804	Activation
ACTTTATAAAGATTTTGACT	YKR061W	-5.20803996097088	4.36063347713595	10.1748386991721	0.00142370152803292	0.0465629263599804	Activation
TCGCACGGTCACTACTCACG	YCR053W	10.8401916543537	13.7312792143552	10.1657635600812	0.00143072649160465	0.0466566563454099	Activation
AAGTCGTTTTGTTGCTCCGG	YLR383W	7.11950308761491	8.15727592143541	10.1558057816639	0.00143847508893632	0.0467733726019933	Activation
ACTTTGATGAGTAAGAAGGG	YGL215W	8.65087691801057	10.2209404723807	10.1338571434947	0.00145570471044429	0.0471968076351562	Activation
GTAAGAAAAGAAGCTACTAC	YDR131C	-9.20221508617488	2.94554024805831	10.1063260828762	0.00147761232147891	0.047769034646543	Activation
ATGAATATCTTATAAAATTA	YJL091C	-8.83703602534865	2.7261417722549	10.0862645724294	0.00149378612756924	0.0480638942025458	Activation
GACGCAGGCACTTTTGAAGG	YJL065C	4.68713990380205	11.3273542025892	10.084395479474	0.00149530211059801	0.0480638942025458	Activation
GCCTTTGTGCATTTAGTATC	YJR112W	-6.2527392493298	4.34245877115312	10.0455971044305	0.00152712495407891	0.0489020858408292	Activation
AGGAGGGTCATTAAAATGCT	SUT128	7.11998087498597	11.4824831526393	10.0420150579952	0.0015300973551552	0.0489020858408292	Activation
GCAGCAGCCGCACCCCAATG	YNR028W	-5.14537891954825	4.76607961822907	10.0181281128317	0.00155006925887283	0.0492383794751842	Activation
GTACTCCTGATCGACGCCGG	YEL043W	6.63253275747946	9.48466929147533	10.0141464205306	0.00155342393920945	0.0492383794751842	Activation
GAAAAAAGGTTATAGTACAT	YMR273C	7.48788508068374	15.1249039170633	10.013715625484	0.00155378733590793	0.0492383794751842	Activation
GCATTATTGAATTTGAAACG	YMR059W	5.25310935483931	11.8012059167502	10.0051397945733	0.0015610394136324	0.0493288454707839	Activation
TTTGATCAGAGTTCTAAAGT	CUT892	10.9716570899163	10.3955926004205	9.98942652341857	0.00157441628630302	0.0495539524236652	Activation
ACGTTTTTAACAATTAACTC	YHR174W	10.2602613328338	10.5225694013901	9.98640972639171	0.00157699777279805	0.0495539524236652	Activation
GCGATAGCACGTAACCACGC	YGL030W	4.49529171112539	10.0391092647635	9.9489592713109	0.00160940356521509	0.0504309754038628	Activation
AGAATTGAAAGATCAGAATG	YDL001W	7.42794549052346	9.07383794272857	9.94192157418143	0.00161556815179725	0.0504831296012856	Activation
AAAATAAATTGTACGAACTG	YMR308C	5.97839807445032	11.0028267045996	9.9279454364227	0.00162788139464359	0.0507265930141994	Activation
GTGATAGGGAAAAATAGGGT	CUT700	7.26185181447534	7.64268790814694	9.90537487622574	0.0016479675647497	0.0512102496990639	Activation
GCTTACAAACGCTTTTAGCG	CUT824	3.82670242673739	10.9348675044717	9.89242186322878	0.00165960801825647	0.0513713218081559	Activation
ATGCTGTCCAATGGATTGGG	CUT530	6.89207068423289	12.3785322998233	9.88942874434563	0.00166230966449996	0.0513713218081559	Activation
GGGGACAAAATAGCAGAGTG	YNL010W	8.50984373684817	10.3273573890679	9.8766830179684	0.00167386417683858	0.0514813117703436	Activation
TTTCTCAGGAAATATAAACT	YDR295C	-8.53040896834701	2.7955269630621	9.87365512614417	0.0016766210226972	0.0514813117703436	Activation
AATCAATAAAACGTTAGAGA	CUT242	8.01640638058628	9.65528645823049	9.8694203843039	0.00168048440345861	0.0514813117703436	Activation
AAATGCTTTGATACCAGAAT	YPR193C	8.57553942019125	10.6419386453536	9.86532909405116	0.00168422547866965	0.0514813117703436	Activation
TACGGCCATAAGCTGGAAGA	YGL198W	9.24900913093252	8.0576256969782	9.84301334586667	0.00170478003719368	0.0519679958077139	Activation
TGCACAACGTCACTCAAAGG	YBR104W	-7.0199656884228	4.78525531185212	9.81778736059542	0.0017283214130205	0.0525428444749702	Activation
AATCAATGACTTTTTGTTTT	YOR355W	-4.24879923242469	4.88089317199627	9.81255837546689	0.00173324227224578	0.0525500319190627	Activation
AGAGTGTTCTCTTCAAAGTT	SUT591	5.25627799385733	9.95032672328528	9.80303987166622	0.00174223635665402	0.0526289434380246	Activation
GGCAATACCAGAATTAATAG	YNR019W	-8.46770417218076	2.46976367788641	9.79912907577766	0.00174594538184744	0.0526289434380246	Activation
AAAAAAGTGAAAAGGGATGG	YLR039C	9.81324275205831	11.6741970563332	9.79274596831662	0.00175201635959118	0.0526289434380246	Activation
GCACATTCGAAAATTCAAGG	YGR007W	7.62354477803491	8.81291408173577	9.78502682832532	0.00175938662281168	0.0526289434380246	Activation
GCCATGATTCAAAGAAAGCG	CUT792	-3.35351898267649	5.27243498217354	9.78144351157295	0.00176281865668982	0.0526289434380246	Activation
GAACAGGGCGAGCAATGGCG	SUT716	6.47653059657447	11.3963388812919	9.77787323286995	0.00176624495034003	0.0526289434380246	Activation
GCGCGGACAACTGAAATACG	YCL028W	4.62621898537162	8.14197694274267	9.76221592142877	0.00178135069469219	0.0526289434380246	Activation
TTTTCTTAAACAAATATATT	YLR040C	6.94843932942104	5.55988712457171	9.76204482570618	0.00178151648427555	0.0526289434380246	Activation
GGCTCTTATTCACTAAATCT	YLR274W	4.78796861345236	8.65782804656687	9.76104567809292	0.00178248495795416	0.0526289434380246	Activation
AATCTTCGTTATGAAAACAT	YKL160W	8.76240731106178	9.85496722459584	9.76076231682492	0.00178275971710192	0.0526289434380246	Activation
AGCTAGCTTGAATATGCGTG	SUT243	8.22384139382719	7.75654535981762	9.71610819377437	0.00182659904139355	0.0536368343092632	Activation
GAAGCGCTCCACGAAATGTG	YOR378W	-8.21932944347189	2.72628139981294	9.70961969785872	0.00183305943646142	0.0536368343092632	Activation
AATTAAAAAAGCAAGCACCT	YDL077C	10.5968907527186	8.50928946883239	9.70778720889923	0.00183488817941294	0.0536368343092632	Activation
GCTACAGACGCCACGCGGCC	YIL101C	4.65007763932539	10.6723234506409	9.70664757152753	0.00183602641957185	0.0536368343092632	Activation
TAGCATTGTCACTAAGGACG	YKL038W	-10.3153758879982	3.98525957400278	9.6922193761521	0.00185049896243175	0.0539192139235309	Activation
TATTTCGCATATATAGGGGT	YBR214W	9.79741330001527	9.58021016613203	9.67209694752986	0.00187087654739054	0.0543717438047332	Activation
ACGATCAGTCTGTACACAGA	YKR097W	9.40183627784813	7.54775676200134	9.66435304051104	0.0018787791250988	0.0544603209957579	Activation
TCCTTCGTTTCGTCTCAACG	YHR098C	7.87203640410993	9.61505459054119	9.64386215774824	0.00189985347527114	0.054929268777298	Activation
AGTATTTCAATTGACCAACG	YDR303C	9.84686589208994	8.39971673141964	9.6242786669279	0.00192021853126777	0.0551524134619576	Activation
GATATTTCCGCATCCCTTTG	YER173W	8.80561959927055	11.2121561302432	9.62311861211661	0.00192143180269012	0.0551524134619576	Activation
GATTTGCCTGTTAGCGATGT	YBR066C	6.64074552583222	10.3120905656659	9.61793262419929	0.00192686520324316	0.0551524134619576	Activation
GCACGAAGGTAAAAATAAAT	SUT750	7.55225170371347	13.8697289396502	9.61354822466792	0.00193147092214007	0.0551524134619576	Activation
ACATAATCATTCTTCAAACC	CUT419	9.9531786240761	10.1436451100925	9.61289930402137	0.00193215354702704	0.0551524134619576	Activation
AGGAGTTAATTTTATTTTAC	SUT630	5.92765156508485	6.21050896423107	9.60387033487025	0.00194167688604316	0.0551806459541363	Activation
GATTTAATAAGAGTATAGTC	YLL034C	5.33200115128028	10.8596186037294	9.59895129618165	0.00194688527064195	0.0551806459541363	Activation
ATCCCCACAGGATTAATCCT	YOR332W	5.11580907966675	9.33895610585362	9.59799502983539	0.00194789942929559	0.0551806459541363	Activation
CGTTGGCACCGACATTGGAG	YHR075C	9.54165094532772	10.6424204539122	9.58413743284864	0.00196265622469615	0.055330440444317	Activation
ATTCCGGACCTTTATAATTG	YKL197C	9.69601097437885	7.28071813152726	9.58376740001602	0.00196305181822412	0.055330440444317	Activation
TATATCATATATCTGCATTC	CUT491	7.41306766381752	6.90745120116614	9.57340275348	0.00197416532613662	0.0555042271393499	Activation
AAGTTAATGTCTACCTCTCT	YKR030W	10.7808394583413	11.6648795972332	9.56300947293343	0.00198537359405595	0.0556388178866115	Activation
GTGATATGCCAGGAATTCCA	YKL018W	9.59896295562216	9.01886243040009	9.55954747609528	0.00198912136962409	0.0556388178866115	Activation
ATTTTCCCGTCATCTTGGCA	YKL171W	5.77211767604794	9.50298342701472	9.55395276202274	0.00199519308075994	0.0556388178866115	Activation
GGGAAGTTAACTGAGTATAT	YLR446W	5.49186270243523	7.70152761051361	9.55064513154107	0.00199879155003605	0.0556388178866115	Activation
GGCCGGATGTTATTAGTGAG	CUT698	6.32368996038926	10.9373720897723	9.54080442403774	0.00200953650701115	0.055798929175268	Activation
AGTAATCCTCATAAGGGAAT	CUT606	-7.7143910389848	4.3008342422061	9.53494031636781	0.00201596728877853	0.055798929175268	Activation
GTTAAGATTGAAGAGGAAAG	CUT858	10.6038768181009	16.4083913405527	9.53175822122346	0.0020194656128685	0.055798929175268	Activation
GTTGATGCTTTGTTGTACAG	YBL032W	10.6014092507151	9.74222915573262	9.51209627664133	0.00204121845697688	0.0562613971753481	Activation
AACTAAATAAATAAAAATCG	YFR050C	6.90701199545271	11.6905177206999	9.503233257507	0.00205110153200495	0.0563017582187735	Activation
GCGGTTTAACAAAGTGAATT	YJR093C	5.58221039882605	12.4537538349063	9.50178547274395	0.00205272054835785	0.0563017582187735	Activation
GATTCCTCAACAGGCAGACG	YIR015W	4.5827906590581	8.1576997380015	9.49154697728187	0.00206420701198443	0.0564787177083934	Activation
AGCATTGGCAAAGACTTGAC	YGL124C	5.54592108452376	9.23804023978247	9.48223134606414	0.00207471474723391	0.0566019082559232	Activation
AATATTATAATTTTTGAATT	CUT253	4.6682400602357	9.81706738923462	9.47862186192124	0.0020788006954395	0.0566019082559232	Activation
CCGACGCTCAGATATTGGTG	YGR150C	-4.20088661781093	5.56381852577312	9.45683888069107	0.00210363291766352	0.0569739613335084	Activation
GCGCAATACATCGGTTTGGT	YHR069C-A	5.57249581176389	9.85295296471376	9.45428959746653	0.00210655865126589	0.0569739613335084	Activation
CTTTCACACTGATGTAGTGG	YBR086C	9.54927351168172	6.46924739121541	9.4508956664154	0.00211046016612314	0.0569739613335084	Activation
GGGCGGAGGGAGCAGTAAAG	YOL087C	8.05085060487495	9.692912003318	9.44290906049032	0.00211967015666105	0.0569739613335084	Activation
GATAAGGGCCAGTGAAATAG	YDR313C	-9.24791803986907	3.23309923760916	9.44251839670755	0.0021201217063762	0.0569739613335084	Activation
GCAGCGCAACTTAAGAACTG	YCL025C	-8.64148805708891	2.69759658632528	9.44008395221467	0.00212293776407617	0.0569739613335084	Activation
GAAATGCGTATTCTTATGGT	CUT473	5.97432545180223	6.84173154461559	9.43457092981098	0.0021293290149748	0.0570090999761034	Activation
ACAATTCTCCGGCATACGGG	YMR003W	6.65346230650566	10.2120258584797	9.41878775455835	0.00214773457647604	0.0573649678069244	Activation
GCATTCACGACTATGTCGCG	YHR032C-A	4.54284273278323	9.90423031057509	9.40484710127667	0.00216412564831569	0.0576376816439476	Activation
ATAAAAATTACTACTTACAC	YLR083C	5.65125665800741	11.1064270060249	9.39237514784264	0.00217889736974681	0.0576376816439476	Activation
AAGCAAATTTTCTTTCGAGC	YMR170C	-8.92173861002286	2.72000351354568	9.38948286652417	0.00218233755668725	0.0576376816439476	Activation
GTACTTGTTTAATGTTACTT	YDL167C	-4.53032379738054	3.46975822378231	9.38944987245471	0.00218237683282537	0.0576376816439476	Activation
GCCTAAGGTTGTAAGGAGCC	CUT283	5.21348385086015	11.1618557144615	9.38839346727794	0.00218363475652324	0.0576376816439476	Activation
GGCTTTATAATTGAATCTCT	SUT739	5.38621731066932	9.08424176188723	9.37736863021089	0.0021968066464953	0.0577716684195716	Activation
CGATCGTATCTCTTGTCGGT	YMR214W	6.73219715758281	10.3867251842492	9.37480181611431	0.00219988488813398	0.0577716684195716	Activation
TTTCGCGTAGCGTAGTTTAT	YNL072W	-4.78526757482912	3.57450996403286	9.36738277023875	0.0022088067704273	0.0577716684195716	Activation
GCAGGCGGCTCGCCATTTGG	SUT104	4.45874554768149	10.3225309136449	9.36609357147205	0.0022103608541646	0.0577716684195716	Activation
CGTTTTAAGTTCGTTGCTGA	YHR172W	7.51051094422833	8.46149190700595	9.36269712896183	0.00221446045822925	0.0577716684195716	Activation
GGAGATGTTTCTCCGCCGCG	YPR138C	4.59125236639419	9.88644155878757	9.35486238770227	0.0022239466577367	0.0578845327296758	Activation
ATTGCTTAAGACATAATAAG	YMR129W	6.87055812574378	10.2559150071464	9.35037497326891	0.00222939851408349	0.0578921123402514	Activation
GTATCAACTTATGACTGCTC	YDR120C	7.04765571176715	9.5155449902152	9.34126804283995	0.00224050443194075	0.0580461402251995	Activation
TCCATTACTCAATGAGAACA	YNL212W	8.94324734633666	9.83254473179109	9.33215617226724	0.00225167254545393	0.0581533135863217	Activation
ATGTAAATCAGGGGACTTGT	YER012W	9.75780777287209	8.90244148300716	9.32944287669579	0.00225500903994027	0.0581533135863217	Activation
CCTAACCCCGAAAAGTATTG	YMR209C	8.77295645947196	7.25210754687005	9.31588218484848	0.00227175972307856	0.0584509187465489	Activation
GACTTAAATCATTACATAAA	YAL001C	-8.95097268652504	3.75527461531188	9.31044560090968	0.00227851059492746	0.0584904619082295	Activation
GAGGTAGCATGTGAAAACGC	CUT880	7.03661260992438	8.86267087321934	9.30292720038728	0.00228788010815905	0.058596892815818	Activation
GACGACGGTAGAAAGATTTC	YIL056W	6.12875016589719	10.0067098514042	9.28756233291712	0.00230714972366486	0.0589558214124657	Activation
GTAGTGTTACTTGCGTTCGA	YKR047W	-9.85869959142717	4.04460776417552	9.26461870534731	0.00233623111470192	0.0595516899943313	Activation
GGTCATGCTTTTTGTTCGAG	SUT480	-8.62651921203968	2.79676764854165	9.26081722980333	0.00234108533495276	0.0595516899943313	Activation
AATTTTTGTTTGATTTGTAT	CUT919	6.52576725243511	11.0691577923235	9.23878537548902	0.00236942070121117	0.0600512584254945	Activation
ATTATACTCCTTTTTTGCAT	YNL012W	-7.81053605298551	2.53479738216603	9.23723283671818	0.00237143051189999	0.0600512584254945	Activation
ATTGTTGTTGATTGATTTAG	YDR064W	-9.39178913428023	3.49558943688825	9.20305893109006	0.00241611051156	0.0609654304740682	Activation
AGGCAAACAATATATTATGC	SUT149	8.72682995678611	10.4438124980772	9.20132474689538	0.00241840047788914	0.0609654304740682	Activation
CGAACTGGCTTGCTAAAGCT	YNR016C	4.81853576444187	11.6186125077105	9.18595343729132	0.00243879460804336	0.0612817154800771	Activation
GCTCCGTTAACGAAGAGAAT	snR81	-5.25280148696815	4.90181499175792	9.18364485203016	0.00244187259935768	0.0612817154800771	Activation
CTGTTACGAGCAATGATACG	YBR241C	9.45380879257525	8.55021547463083	9.17443094697897	0.0024541966349474	0.0614535219884821	Activation
AGTAAAATTATATAACGAGA	YER164W	10.4986482702657	13.4113420196867	9.15795958070155	0.00247638537619697	0.0617713614721885	Activation
AAGAAGAAATCCACCAAGGG	SUT292	8.04446936185408	7.75685449374775	9.1554580399191	0.00247977299030416	0.0617713614721885	Activation
GGAAAATATTCCTTGGCACA	YOL119C	6.29431202853075	12.7128340382952	9.15277680830111	0.00248340916597941	0.0617713614721885	Activation
ACTTTACATGCAAATGCATT	YMR059W	6.79747426009899	9.75488080074133	9.13234300364696	0.00251129901137495	0.0620327833110916	Activation
TAATGTATGTATAACTTATT	YPR002W	6.33692560859484	4.28622177099373	9.132062704274	0.00251168379073145	0.0620327833110916	Activation
CCGGTAGATCAATTGGACCA	YER144C	8.65676944956975	8.29448711913131	9.13029322488893	0.00251411421495865	0.0620327833110916	Activation
CAAAAAGTTTCTCATTCAAG	YNR044W	8.00971377503555	11.0587108279243	9.1285995805932	0.00251644271347969	0.0620327833110916	Activation
GGTGTCCCAGAAAAAGAGTT	CUT109	-6.35020229838608	4.22493392142913	9.12487731729766	0.00252156794347101	0.0620327833110916	Activation
GGAAAAGCGCGTAAATGATG	YBR208C	5.95135414256492	9.8315508852629	9.09897079661364	0.002557533663038	0.0626435310087322	Activation
AGCCTTTAGATCTAGAGATG	YHR073W	4.3236399547773	10.261472554968	9.09895010506614	0.00255756259600636	0.0626435310087322	Activation
GTAGCCTAAGCAGTAGTATC	YJL092W	-6.2866421669728	4.43035359599848	9.08972617533932	0.00257049354952401	0.0626907112710163	Activation
GTAGTTGGCAGCTTTCTGCT	YDL087C	5.40234551965331	10.658279315205	9.08960373506874	0.00257066564313314	0.0626907112710163	Activation
AAGAAAATCTCACGCTGTCA	YGL165C	10.4710988300607	10.8168703876793	9.06790616775956	0.00260134767033264	0.0632379734287489	Activation
GCAAAAATATCGGTCTTCGG	YCR061W	6.19949675276754	10.1982686519832	9.06577534571543	0.00260438079194883	0.0632379734287489	Activation
[truncated: 10,756 more rows]

## Sheet: Repression_screens_main
Guide	Gene	logFC	logCPM	LR	PValue	FDR	Library
[truncated: 20,561 more rows]

## Sheet: Significant_genes_main
Guide	Gene	logFC	logCPM	LR	PValue	FDR	Library
[truncated: 345 more rows]
