# Supplementary material for: Large scale microfluidic CRISPR screening for increased amylase secretion in yeast
Source: Lab Chip. Author manuscript; Available in PMC 2023 Aug 15. (PMC7614956; doi:10.1039/d3lc00111c)
Supplement: ESI 7 [file EMS184631-supplement-ESI_7.xlsx]

## Sheet: README
Table S2: GO enrichment results
Tabs	Description
Genes_TopGO	Broad TopGO analysis of genes from activation and repression screens (FDR < 0.3, logFC > 3)
SCUTS_TopGO	TopGO analysis of SUTs sand CUTs from activation screens (FDR < 0.05, logFC > 3)
Genes_TopGO
Header	Description
GO ID	GO term ID
Term	GO term
Definition	GO term definition
Genes frequency	Frequency of identified genes by total genes in GO term in percent
Pvalue	Pvalue
Pvalue (-log10)	Pvalue (-log10)
Significant genes	Systematic name of genes in enriched term
Significant genes symbol	Common name of genes in enriched term
Category ID	GO category
Library	Gene repression or activation
SCUTS_TopGO
Header	Description
GO ID	GO term ID
Term	GO term
Definition	GO term definition
Genes frequency	Frequency of identified genes by total genes in GO term in percent
Pvalue	Pvalue
Pvalue (-log10)	Pvalue (-log10)
Significant genes	Systematic name of genes in enriched term
Significant genes symbol	Common name of genes in enriched term
Category ID	GO category
Library	Gene repression or activation

## Sheet: Genes_TopGO
GO ID	Term	Definition	Genes frequency	Pvalue	Pvalue (-log10)	Significant genes	Significant genes symbol	Category ID	Library
GO:0061671	Cbp3p-Cbp6 complex	A protein complex located at the mitochondrial ribosome tunnel exit that is involved in efficient translation and protein complex assembly.	100% (2/2)	0.0360618800	1.44	YBR120C;YPL215W	CBP6;CBP3	CC	Activation
GO:0030008	TRAPP complex	A large complex that acts as a tethering factor involved in transporting vesicles from the ER through the Golgi to the plasma membrane. A TRAPP (transport protein particle) complex has a core set of proteins which are joined by specific subunits depending on the cellular component where a given TRAPP complex is active.	50% (5/10)	0.0264773400	1.58	YBR254C;YDR246W;YEL048C;YML077W;YOR115C	TRS20;TRS23;TCA17;BET5;TRS33	CC	Activation
GO:1990304	MUB1-RAD6-UBR2 ubiquitin ligase complex	NA	100% (2/2)	0.0360618800	1.44	YGL058W;YLR024C	RAD6;UBR2	CC	Activation
GO:0000407	phagophore assembly site	Punctate structures proximal to the endoplasmic reticulum which are the sites where the Atg machinery assembles upon autophagy induction.	40.476% (17/42)	0.0383776500	1.42	YBR128C;YBR254C;YDL113C;YDR246W;YGR223C;YJL036W;YKR078W;YLL042C;YLR211C;YLR312C;YML077W;YOL083W;YOR115C;YOR152C;YPL100W;YPL120W;YPL166W	ATG14;TRS20;ATG20;TRS23;HSV2;SNX4;;ATG10;ATG38;;BET5;ATG34;TRS33;ATG40;ATG21;VPS30;ATG29	CC	Activation
GO:1990070	TRAPPI protein complex	NA	66.667% (4/6)	0.0140103100	1.85	YBR254C;YDR246W;YML077W;YOR115C	TRS20;TRS23;BET5;TRS33	CC	Activation
GO:1990071	TRAPPII protein complex	NA	55.556% (5/9)	0.0156506500	1.81	YBR254C;YDR246W;YEL048C;YML077W;YOR115C	TRS20;TRS23;TCA17;BET5;TRS33	CC	Activation
GO:1990072	TRAPPIII protein complex	NA	57.143% (4/7)	0.0278145800	1.56	YBR254C;YDR246W;YML077W;YOR115C	TRS20;TRS23;BET5;TRS33	CC	Activation
GO:0030173	integral component of Golgi membrane	The component of the Golgi membrane consisting of the gene products and protein complexes having at least some part of their peptide sequence embedded in the hydrophobic region of the membrane.	35.714% (10/28)	0.0278437500	1.56	YAL042W;YDR367W;YER074W-A;YFL048C;YGR172C;YIL004C;YKR030W;YNL238W;YNL263C;YPL050C	ERV46;KEI1;YOS1;EMP47;YIP1;BET1;GMH1;KEX2;YIF1;MNN9	CC	Activation
GO:0042597	periplasmic space	The region between the inner (cytoplasmic) and outer membrane (Gram-negative Bacteria) or cytoplasmic membrane and cell wall (Fungi and Gram-positive Bacteria).	83.333% (5/6)	0.0012391010	2.91	YGR040W;YIL101C;YLR377C;YMR008C;YPR026W	KSS1;XBP1;FBP1;PLB1;ATH1	CC	Activation
GO:0034045	phagophore assembly site membrane	A cellular membrane associated with the phagophore assembly site.	41.667% (10/24)	0.0085965730	2.07	YBR128C;YDL113C;YGR223C;YLL042C;YLR211C;YLR312C;YOL083W;YOR152C;YPL100W;YPL120W	ATG14;ATG20;HSV2;ATG10;ATG38;;ATG34;ATG40;ATG21;VPS30	CC	Activation
GO:0034271	phosphatidylinositol 3-kinase complex, class III, type I	A class III phosphatidylinositol 3-kinase complex that is involved in autophagy. In budding yeast, this complex consists of Vps30p, Vps34p, Apg14p and Vps15p.	75% (3/4)	0.0234660900	1.63	YBR128C;YLR211C;YPL120W	ATG14;ATG38;VPS30	CC	Activation
GO:0042788	polysomal ribosome	A ribosome bound to mRNA that forms part of a polysome.	66.667% (4/6)	0.0140103100	1.85	YDR252W;YDR283C;YGL195W;YGR285C	BTT1;GCN2;GCN1;ZUO1	CC	Activation
GO:0031228	intrinsic component of Golgi membrane	The component of the Golgi membrane consisting of the gene products and protein complexes having either part of their peptide sequence embedded in the hydrophobic region of the membrane or some other covalently attached group such as a GPI anchor that is similarly embedded in the membrane.	35.714% (10/28)	0.0278437500	1.56	YAL042W;YDR367W;YER074W-A;YFL048C;YGR172C;YIL004C;YKR030W;YNL238W;YNL263C;YPL050C	ERV46;KEI1;YOS1;EMP47;YIP1;BET1;GMH1;KEX2;YIF1;MNN9	CC	Activation
GO:0015935	small ribosomal subunit	The smaller of the two subunits of a ribosome.	27.397% (20/73)	0.0495964600	1.30	YBR048W;YBR251W;YDL045W-A;YDR175C;YDR283C;YER131W;YGL129C;YGR054W;YGR285C;YHR059W;YHR075C;YJL190C;YJR123W;YLR048W;YLR167W;YLR367W;YML026C;YOL040C;YOR096W;YPL090C	RPS11B;MRPS5;MRP10;RSM24;GCN2;RPS26B;RSM23;;ZUO1;FYV4;PPE1;RPS22A;RPS5;RPS0B;RPS31;RPS22B;RPS18B;RPS15;RPS7A;RPS6A	CC	Activation
GO:0030905	retromer, tubulation complex	The dimeric subcomplex of the retromer, believed to be peripherally associated with the membrane. This dimeric complex is responsible for remodelling endosomal membranes to form a tube-structure to which cargo molecules are selected for recycling. The budding yeast complex comprises Vps5p and Vps17p, and may contain multiple copies of a Vps5p/Vps17p dimer. The mammalian complex contains SNX1 or S…	100% (2/2)	0.0360618800	1.44	YOR069W;YOR132W	VPS5;VPS17	CC	Activation
GO:0030014	CCR4-NOT complex	The Ccr4-Not complex is an eukaryotically conserved deadenylase that can initiate cytoplasmic mRNA decay, and reduce translation by releasing poly(A)-binding protein (Pab1/PABPC1). Ccr4-Not contains seven core subunits, including two poly(A)-specific exonucleases, Ccr4/CNOT6/CNOT6L and Caf1/Pop2/CNOT7/CNOT8.	50% (4/8)	0.0473972000	1.32	YAL021C;YDL165W;YDR252W;YFL028C	CCR4;CDC36;BTT1;CAF16	CC	Activation
GO:0046503	glycerolipid catabolic process	The chemical reactions and pathways resulting in the breakdown of glycerolipids, any lipid with a glycerol backbone.	50% (7/14)	0.0085293560	2.07	YIL124W;YKR089C;YML059C;YMR008C;YNL012W;YOL011W;YOR084W	AYR1;TGL4;NTE1;PLB1;SPO1;PLB3;LPX1	BP	Activation
GO:0006740	NADPH regeneration	A metabolic process that generates a pool of NADPH by the reduction of NADP+.	42.857% (6/14)	0.0343994100	1.46	YCR073W-A;YGR248W;YLR354C;YNR034W;YOR095C;YPR074C	SOL2;SOL4;TAL1;SOL1;RKI1;TKL1	BP	Activation
GO:0140115	export across plasma membrane	NA	38.889% (7/18)	0.0393551000	1.40	YBR043C;YDR011W;YDR338C;YLL028W;YNL065W;YNR055C;YPR156C	QDR3;SNQ2;;TPO1;AQR1;HOL1;TPO3	BP	Activation
GO:0006855	drug transmembrane transport	The process in which a drug is transported across a membrane.	50% (4/8)	0.0471511800	1.33	YBR043C;YDR338C;YML116W;YNL065W	QDR3;;ATR1;AQR1	BP	Activation
GO:0006098	pentose-phosphate shunt	The metabolic process in which glucose-6-phosphate is oxidized to form carbon dioxide (CO2) and ribulose 5-phosphate, coupled to reduction of NADP+ to NADPH; ribulose 5-P then enters a series of reactions that can yield biosynthetic precursors (ribose-5-phosphate and erythrose-4-phosphate) and glycolytic intermediates (fructose-6-phosphate and glyceraldehyde-3-phosphate).	46.154% (6/13)	0.0233122500	1.63	YCR073W-A;YGR248W;YLR354C;YNR034W;YOR095C;YPR074C	SOL2;SOL4;TAL1;SOL1;RKI1;TKL1	BP	Activation
GO:0031990	mRNA export from nucleus in response to heat stress	The directed movement of mRNA from the nucleus to the cytoplasm during a heat stimulus, a temperature stimulus above the optimal temperature for the organism; in particular, a process that enables an organism withstand exposure to temperatures that would otherwise lethally impair poly(A)+ mRNA-nucleus export.	50% (4/8)	0.0471511800	1.33	YDL088C;YDL116W;YKL068W;YLR335W	ASM4;NUP84;NUP100;NUP2	BP	Activation
GO:0046351	disaccharide biosynthetic process	The chemical reactions and pathways resulting in the formation of disaccharides, sugars composed of two monosaccharide units.	66.667% (4/6)	0.0139300700	1.86	YBR126C;YLR377C;YML100W;YMR105C	TPS1;FBP1;TSL1;PGM2	BP	Activation
GO:0006528	asparagine metabolic process	The chemical reactions and pathways involving asparagine, 2-amino-3-carbamoylpropanoic acid.	66.667% (4/6)	0.0139300700	1.86	YHR139C;YIL101C;YLR027C;YML096W	SPS100;XBP1;AAT2;	BP	Activation
GO:0042147	retrograde transport, endosome to Golgi	The directed movement of membrane-bounded vesicles from endosomes back to the trans-Golgi network where they are recycled for further rounds of transport.	35.897% (14/39)	0.0094295850	2.03	YDL113C;YEL048C;YFR019W;YGL210W;YHR012W;YJL036W;YJR125C;YKR078W;YLR039C;YMR004W;YNL297C;YOR069W;YOR132W;YPL120W	ATG20;TCA17;FAB1;YPT32;VPS29;SNX4;ENT3;;RIC1;MVP1;MON2;VPS5;VPS17;VPS30	BP	Activation
GO:0042908	xenobiotic transport	The directed movement of a xenobiotic, a compound foreign to living organisms, into, out of or within a cell, or between cells, by means of some agent such as a transporter or pore.	43.75% (7/16)	0.0200250000	1.70	YBR043C;YDR011W;YDR338C;YLL028W;YNL065W;YNR055C;YPR156C	QDR3;SNQ2;;TPO1;AQR1;HOL1;TPO3	BP	Activation
GO:0006534	cysteine metabolic process	The chemical reactions and pathways involving cysteine, 2-amino-3-mercaptopropanoic acid.	40% (6/15)	0.0483878800	1.32	YGL184C;YJR010W;YKL001C;YLR303W;YOR251C;YPR167C	STR3;MET3;MET14;MET17;TUM1;MET16	BP	Activation
GO:0040029	regulation of gene expression, epigenetic	Any process that modulates the frequency, rate or extent of gene expression; the process is mitotically or meiotically heritable, or is stably self-propagated in the cytoplasm of a resting cell, and does not entail a change in DNA sequence.	27.551% (27/98)	0.0231171300	1.64	YAR003W;YBL079W;YBR060C;YBR088C;YBR095C;YCL061C;YDR121W;YDR181C;YGL014W;YGL058W;YGL133W;YGL150C;YIL084C;YIL126W;YJL065C;YKL160W;YLL022C;YLR052W;YLR274W;YLR399C;YML109W;YMR247C;YMR273C;YNL021W;YOR274W;YPL138C;YPL181W	SWD1;NUP170;ORC2;POL30;RXT2;MRC1;DPB4;SAS4;PUF4;RAD6;ITC1;INO80;SDS3;STH1;DLS1;ELF1;HIF1;IES3;MCM5;BDF1;ZDS2;RKR1;ZDS1;HDA1;MOD5;SPP1;CTI6	BP	Activation
GO:0015931	nucleobase-containing compound transport	The directed movement of nucleobases, nucleosides, nucleotides and nucleic acids, into, out of or within a cell, or between cells, by means of some agent such as a transporter or pore.	25.568% (45/176)	0.0169267600	1.77	YBL032W;YBL042C;YBL079W;YBR034C;YBR192W;YCR035C;YCR073W-A;YDL088C;YDL116W;YDL160C;YDR432W;YEL006W;YER056C;YER131W;YGL139W;YGL238W;YGL247W;YGR081C;YGR285C;YHR170W;YIL006W;YJR074W;YJR123W;YKL002W;YKL068W;YKL188C;YKL214C;YKR094C;YLL034C;YLR025W;YLR048W;YLR119W;YLR208W;YLR233C;YLR335W;YML026C;YMR047C;YMR129W;YMR273C;YMR308C;YNL227C;YNR006W;YNR034W;YOL040C;YOR294W	HEK2;FUI1;NUP170;HMT1;RIM2;RRP43;SOL2;ASM4;NUP84;DHH1;NPL3;YEA6;FCY2;RPS26B;FLC3;CSE1;BRR6;SLX9;ZUO1;NMD3;YIA6;MOG1;RPS5;DID4;NUP100;PXA2;YRA2;RPL40B;RIX7;SNF7;RPS0B;SRN2;SEC13;EST1;NUP2;RPS18B;NUP116;POM152;ZDS1;PSE1;JJJ1;VPS27;SOL1;RPS15;RRS1	BP	Activation
GO:0015936	coenzyme A metabolic process	The chemical reactions and pathways involving coenzyme A, 3'-phosphoadenosine-(5')diphospho(4')pantatheine, an acyl carrier in many acylation and acyl-transfer reactions in which the intermediate is a thiol ester.	50% (4/8)	0.0471511800	1.33	YGR277C;YKR072C;YLR151C;YML075C	CAB4;SIS2;PCD1;HMG1	BP	Activation
GO:0046475	glycerophospholipid catabolic process	The chemical reactions and pathways resulting in the breakdown of glycerophospholipids, any derivative of glycerophosphate that contains at least one O-acyl, O-alkyl, or O-alkenyl group attached to the glycerol residue.	66.667% (4/6)	0.0139300700	1.86	YML059C;YMR008C;YNL012W;YOL011W	NTE1;PLB1;SPO1;PLB3	BP	Activation
GO:2000104	negative regulation of DNA-dependent DNA replication	NA	50% (6/12)	0.0149006200	1.83	YAL021C;YBR274W;YCL061C;YDR217C;YER164W;YKL022C	CCR4;CHK1;MRC1;RAD9;CHD1;CDC16	BP	Activation
GO:0044773	mitotic DNA damage checkpoint	A mitotic cell cycle checkpoint that detects and negatively regulates progression through the cell cycle in response to DNA damage.	44.444% (8/18)	0.0117049600	1.93	YBR274W;YCL061C;YDR217C;YGL058W;YJL090C;YMR190C;YMR224C;YNL127W	CHK1;MRC1;RAD9;RAD6;DPB11;SGS1;MRE11;FAR11	BP	Activation
GO:0044774	mitotic DNA integrity checkpoint	A mitotic cell cycle process that controls cell cycle progression in response to changes in DNA structure by monitoring the integrity of the DNA. The DNA integrity checkpoint begins with detection of DNA damage, defects in DNA structure or DNA replication, and ends with signal transduction.	35.714% (10/28)	0.0275619400	1.56	YBR274W;YCL061C;YDR217C;YER173W;YGL058W;YJL090C;YKL108W;YMR190C;YMR224C;YNL127W	CHK1;MRC1;RAD9;RAD24;RAD6;DPB11;SLD2;SGS1;MRE11;FAR11	BP	Activation
GO:0010389	regulation of G2/M transition of mitotic cell cycle	Any signalling pathway that modulates the activity of a cell cycle cyclin-dependent protein kinase to modulate the switch from G2 phase to M phase of the mitotic cell cycle.	42.105% (8/19)	0.0169270500	1.77	YBR274W;YER173W;YJL090C;YKL108W;YML109W;YMR190C;YMR224C;YMR273C	CHK1;RAD24;DPB11;SLD2;ZDS2;SGS1;MRE11;ZDS1	BP	Activation
GO:0009067	aspartate family amino acid biosynthetic process	The chemical reactions and pathways resulting in the formation of amino acids of the aspartate family, comprising asparagine, aspartate, lysine, methionine and threonine.	41.026% (16/39)	0.0011448900	2.94	YBR115C;YCR053W;YDL182W;YDR034C;YDR234W;YGL184C;YIL094C;YJR010W;YKL001C;YLL062C;YLR017W;YLR027C;YLR303W;YML096W;YMR009W;YPR167C	LYS2;THR4;LYS20;LYS14;LYS4;STR3;LYS12;MET3;MET14;MHT1;MEU1;AAT2;MET17;;ADI1;MET16	BP	Activation
GO:0009085	lysine biosynthetic process	The chemical reactions and pathways resulting in the formation of lysine, 2,6-diaminohexanoic acid.	45.455% (5/11)	0.0408536500	1.39	YBR115C;YDL182W;YDR034C;YDR234W;YIL094C	LYS2;LYS20;LYS14;LYS4;LYS12	BP	Activation
GO:0033866	nucleoside bisphosphate biosynthetic process	The chemical reactions and pathways resulting in the formation of a nucleoside bisphosphate, a compound consisting of a nucleobase linked to a deoxyribose or ribose sugar esterified with one phosphate group attached to each of two different hydroxyl groups on the sugar.	50% (5/10)	0.0263072600	1.58	YAL054C;YER178W;YGR277C;YKR072C;YNR016C	ACS1;PDA1;CAB4;SIS2;ACC1	BP	Activation
GO:0034030	ribonucleoside bisphosphate biosynthetic process	The chemical reactions and pathways resulting in the formation of a ribonucleoside bisphosphate, a compound consisting of a nucleobase linked to a ribose sugar esterified with one phosphate group attached to each of two different hydroxyl groups on the sugar.	50% (5/10)	0.0263072600	1.58	YAL054C;YER178W;YGR277C;YKR072C;YNR016C	ACS1;PDA1;CAB4;SIS2;ACC1	BP	Activation
GO:0034033	purine nucleoside bisphosphate biosynthetic process	The chemical reactions and pathways resulting in the formation of a purine nucleoside bisphosphate, a compound consisting of a purine base linked to a deoxyribose or ribose sugar esterified with one phosphate group attached to each of two different hydroxyl groups on the sugar.	50% (5/10)	0.0263072600	1.58	YAL054C;YER178W;YGR277C;YKR072C;YNR016C	ACS1;PDA1;CAB4;SIS2;ACC1	BP	Activation
GO:0044818	mitotic G2/M transition checkpoint	A cell cycle checkpoint that detects and negatively regulates progression from G2 to M phase as part of a mitotic cell cycle.	42.857% (6/14)	0.0343994100	1.46	YBR274W;YER173W;YJL090C;YKL108W;YMR190C;YMR224C	CHK1;RAD24;DPB11;SLD2;SGS1;MRE11	BP	Activation
GO:1902750	negative regulation of cell cycle G2/M phase transition	NA	42.857% (6/14)	0.0343994100	1.46	YBR274W;YER173W;YJL090C;YKL108W;YMR190C;YMR224C	CHK1;RAD24;DPB11;SLD2;SGS1;MRE11	BP	Activation
GO:0006342	chromatin silencing	Repression of transcription by altering the structure of chromatin, e.g. by conversion of large regions of DNA into an inaccessible state often called heterochromatin.	26.804% (26/97)	0.0353673300	1.45	YAR003W;YBL079W;YBR060C;YBR088C;YBR095C;YCL061C;YDR121W;YDR181C;YGL014W;YGL058W;YGL133W;YGL150C;YIL084C;YIL126W;YJL065C;YLL022C;YLR052W;YLR274W;YLR399C;YML109W;YMR247C;YMR273C;YNL021W;YOR274W;YPL138C;YPL181W	SWD1;NUP170;ORC2;POL30;RXT2;MRC1;DPB4;SAS4;PUF4;RAD6;ITC1;INO80;SDS3;STH1;DLS1;HIF1;IES3;MCM5;BDF1;ZDS2;RKR1;ZDS1;HDA1;MOD5;SPP1;CTI6	BP	Activation
GO:0006348	chromatin silencing at telomere	Repression of transcription of telomeric DNA by altering the structure of chromatin.	27.941% (19/68)	0.0450458800	1.35	YAR003W;YBR060C;YBR088C;YBR095C;YCL061C;YDR181C;YGL058W;YGL133W;YGL150C;YIL084C;YJL065C;YLL022C;YLR052W;YLR274W;YLR399C;YMR247C;YNL021W;YPL138C;YPL181W	SWD1;ORC2;POL30;RXT2;MRC1;SAS4;RAD6;ITC1;INO80;SDS3;DLS1;HIF1;IES3;MCM5;BDF1;RKR1;HDA1;SPP1;CTI6	BP	Activation
GO:1902749	regulation of cell cycle G2/M phase transition	NA	42.105% (8/19)	0.0169270500	1.77	YBR274W;YER173W;YJL090C;YKL108W;YML109W;YMR190C;YMR224C;YMR273C	CHK1;RAD24;DPB11;SLD2;ZDS2;SGS1;MRE11;ZDS1	BP	Activation
GO:0015893	drug transport	The directed movement of a drug, a substance used in the diagnosis, treatment or prevention of a disease, into, out of or within a cell, or between cells, by means of some agent such as a transporter or pore.	50% (6/12)	0.0149006200	1.83	YBR043C;YDR011W;YDR338C;YML116W;YNL065W;YNR070W	QDR3;SNQ2;;ATR1;AQR1;PDR18	BP	Activation
GO:0008156	negative regulation of DNA replication	Any process that stops, prevents, or reduces the frequency, rate or extent of DNA replication.	50% (7/14)	0.0085293560	2.07	YAL021C;YBR274W;YCL061C;YDR217C;YER164W;YKL022C;YML058W	CCR4;CHK1;MRC1;RAD9;CHD1;CDC16;SML1	BP	Activation
GO:0010972	negative regulation of G2/M transition of mitotic cell cycle	Any signalling pathway that decreases or inhibits the activity of a cell cycle cyclin-dependent protein kinase to modulate the switch from G2 phase to M phase of the mitotic cell cycle.	42.857% (6/14)	0.0343994100	1.46	YBR274W;YER173W;YJL090C;YKL108W;YMR190C;YMR224C	CHK1;RAD24;DPB11;SLD2;SGS1;MRE11	BP	Activation
GO:0070193	synaptonemal complex organization	A process that is carried out at the cellular level which results in the assembly, arrangement of constituent parts, or disassembly of a synaptonemal complex. A synaptonemal complex is a proteinaceous scaffold formed between homologous chromosomes during meiosis.	40% (6/15)	0.0483878800	1.32	YDR014W-A;YER179W;YGL249W;YHR153C;YIL073C;YJL074C	HED1;DMC1;ZIP2;SPO16;SPO22;SMC3	BP	Activation
GO:0006448	regulation of translational elongation	Any process that modulates the frequency, rate, extent or accuracy of translational elongation.	40% (6/15)	0.0483878800	1.32	YBR246W;YDL160C;YDR385W;YGL195W;YLR172C;YNL197C	RRT2;DHH1;EFT2;GCN1;DPH5;WHI3	BP	Activation
GO:0031573	intra-S DNA damage checkpoint	A mitotic cell cycle checkpoint that slows DNA synthesis in response to DNA damage by the prevention of new origin firing and the stabilization of slow replication fork progression.	45.455% (5/11)	0.0408536500	1.39	YCL061C;YDR217C;YMR190C;YMR224C;YNL127W	MRC1;RAD9;SGS1;MRE11;FAR11	BP	Activation
GO:0016584	nucleosome positioning	Ordering of successions of nucleosomes into regular arrays so that nucleosomes are positioned at defined distances from one another.	66.667% (6/9)	0.0022774230	2.64	YBL079W;YCR052W;YDR303C;YER164W;YGL150C;YIL126W	NUP170;RSC6;RSC3;CHD1;INO80;STH1	BP	Activation
GO:0007130	synaptonemal complex assembly	The cell cycle process in which the synaptonemal complex is formed. This is a structure that holds paired chromosomes together during prophase I of meiosis and that promotes genetic recombination.	46.154% (6/13)	0.0233122500	1.63	YDR014W-A;YER179W;YGL249W;YHR153C;YIL073C;YJL074C	HED1;DMC1;ZIP2;SPO16;SPO22;SMC3	BP	Activation
GO:0005991	trehalose metabolic process	The chemical reactions and pathways involving trehalose, a disaccharide isomeric with sucrose and obtained from certain lichens and fungi.	50% (4/8)	0.0471511800	1.33	YBR126C;YML100W;YMR105C;YPR026W	TPS1;TSL1;PGM2;ATH1	BP	Activation
GO:0009395	phospholipid catabolic process	The chemical reactions and pathways resulting in the breakdown of phospholipids, any lipid containing phosphoric acid as a mono- or diester.	55.556% (5/9)	0.0155457500	1.81	YML059C;YMR008C;YNL012W;YOL011W;YPL268W	NTE1;PLB1;SPO1;PLB3;PLC1	BP	Activation
GO:0009312	oligosaccharide biosynthetic process	The chemical reactions and pathways resulting in the formation of oligosaccharides, molecules with between two and (about) 20 monosaccharide residues connected by glycosidic linkages.	57.143% (4/7)	0.0276628200	1.56	YBR126C;YLR377C;YML100W;YMR105C	TPS1;FBP1;TSL1;PGM2	BP	Activation
GO:0043604	amide biosynthetic process	The chemical reactions and pathways resulting in the formation of an amide, any derivative of an oxoacid in which an acidic hydroxy group has been replaced by an amino or substituted amino group.	22.195% (91/410)	0.0478476400	1.32	YAL016W;YAL054C;YBL032W;YBR034C;YBR048W;YBR120C;YBR139W;YBR246W;YBR251W;YCR024C;YDL044C;YDL045W-A;YDL082W;YDL136W;YDL160C;YDL165W;YDL191W;YDR037W;YDR140W;YDR175C;YDR211W;YDR283C;YDR322W;YDR341C;YDR385W;YDR432W;YER025W;YER056C-A;YER131W;YER153C;YER178W;YFL034C-A;YGL014W;YGL031C;YGL076C;YGL103W;YGL129C;YGL178W;YGL195W;YGR054W;YGR185C;YGR264C;YGR271W;YGR285C;YHL034C;YHR059W;YHR063C;YHR075C;YIL052C;Y…	TPD3;ACS1;HEK2;HMT1;RPS11B;CBP6;;RRT2;MRPS5;SLM5;MTF2;MRP10;RPL13A;RPL35B;DHH1;CDC36;RPL35A;KRS1;MTQ2;RSM24;GCD6;GCN2;MRPL35;;EFT2;NPL3;GCD11;RPL34A;RPS26B;PET122;PDA1;RPL22B;PUF4;RPL24A;RPL7A;RPL28;RSM23;MPT5;GCN1;;TYS1;MES1;SLH1;ZUO1;SBP1;FYV4;PAN5;PPE1;RPL34B;HPM1;TMA108;AIM23;RPS22A;RPS5;RPL14A;RPL40B;ISA1;AAT2;RPS0B;SLS1;RPS31;DPH5;RPS22B;RPS18B;RPM2;;FOL3;MRPL44;RKR1;TIF11;HER2;WHI3;LTO1;AC…	BP	Activation
GO:0034498	early endosome to Golgi transport	The directed movement of substances from early endosomes to the Golgi.	50% (5/10)	0.0263072600	1.58	YDL113C;YEL048C;YGL210W;YJL036W;YJR125C	ATG20;TCA17;YPT32;SNX4;ENT3	BP	Activation
GO:0019878	lysine biosynthetic process via aminoadipic acid	The chemical reactions and pathways resulting in the formation of lysine by the aminoadipic pathway.	55.556% (5/9)	0.0155457500	1.81	YBR115C;YDL182W;YDR034C;YDR234W;YIL094C	LYS2;LYS20;LYS14;LYS4;LYS12	BP	Activation
GO:0045814	negative regulation of gene expression, epigenetic	Any epigenetic process that stops, prevents or reduces the rate of gene expression.	26.804% (26/97)	0.0353673300	1.45	YAR003W;YBL079W;YBR060C;YBR088C;YBR095C;YCL061C;YDR121W;YDR181C;YGL014W;YGL058W;YGL133W;YGL150C;YIL084C;YIL126W;YJL065C;YLL022C;YLR052W;YLR274W;YLR399C;YML109W;YMR247C;YMR273C;YNL021W;YOR274W;YPL138C;YPL181W	SWD1;NUP170;ORC2;POL30;RXT2;MRC1;DPB4;SAS4;PUF4;RAD6;ITC1;INO80;SDS3;STH1;DLS1;HIF1;IES3;MCM5;BDF1;ZDS2;RKR1;ZDS1;HDA1;MOD5;SPP1;CTI6	BP	Activation
GO:0051156	glucose 6-phosphate metabolic process	The chemical reactions and pathways involving glucose 6-phosphate, a monophosphorylated derivative of glucose with the phosphate group attached to C-6.	50% (9/18)	0.0028552490	2.54	YCR073W-A;YDR516C;YGR248W;YLR354C;YLR446W;YMR105C;YNR034W;YOR095C;YPR074C	SOL2;EMI2;SOL4;TAL1;;PGM2;SOL1;RKI1;TKL1	BP	Activation
GO:1990961	xenobiotic detoxification by transmembrane export across the plasma membrane	NA	46.667% (7/15)	0.0134167200	1.87	YBR043C;YDR011W;YDR338C;YLL028W;YNL065W;YNR055C;YPR156C	QDR3;SNQ2;;TPO1;AQR1;HOL1;TPO3	BP	Activation
GO:0031369	translation initiation factor binding	Interacting selectively and non-covalently with a translation initiation factor, any polypeptide factor involved in the initiation of ribosome-mediated translation.	42.105% (8/19)	0.0176421900	1.75	YDR211W;YDR283C;YDR432W;YER025W;YGL195W;YHL034C;YMR260C;YPR129W	GCD6;GCN2;NPL3;GCD11;GCN1;SBP1;TIF11;SCD6	MF	Activation
GO:1902936	phosphatidylinositol bisphosphate binding	NA	36.364% (8/22)	0.0438074100	1.36	YBR260C;YDR103W;YER008C;YGR223C;YJL085W;YJR125C;YPL100W;YPL232W	RGD1;STE5;SEC3;HSV2;EXO70;ENT3;ATG21;SSO1	MF	Activation
GO:0003729	mRNA binding	Interacting selectively and non-covalently with messenger RNA (mRNA), an intermediate molecule between DNA and protein. mRNA includes UTR and coding sequences, but does not contain introns.	26.25% (42/160)	0.0148381800	1.83	YBL032W;YBR233W;YDL087C;YDL136W;YDL160C;YDL191W;YDR021W;YDR037W;YDR432W;YER131W;YGL014W;YGL031C;YGL120C;YGL178W;YGR054W;YGR159C;YGR185C;YGR250C;YGR271W;YHL024W;YHL034C;YJR123W;YKL074C;YKL085W;YKL172W;YLL011W;YLR017W;YLR401C;YML056C;YML117W;YNL197C;YOL149W;YOR236W;YOR386W;YPL012W;YPL126W;YPL184C;YPL215W;YPL217C;YPR042C;YPR129W;YPR163C	HEK2;PBP2;LUC7;RPL35B;DHH1;RPL35A;FAL1;KRS1;NPL3;RPS26B;PUF4;RPL24A;PRP43;MPT5;;NSR1;TYS1;RIE1;SLH1;RIM4;SBP1;RPS5;MUD2;MDH1;EBP2;SOF1;MEU1;DUS3;IMD4;NAB6;WHI3;DCP1;DFR1;PHR1;RRP12;NAN1;MRN1;CBP3;BMS1;PUF2;SCD6;TIF3	MF	Activation
GO:0032266	phosphatidylinositol-3-phosphate binding	Interacting selectively and non-covalently with phosphatidylinositol-3-phosphate, a derivative of phosphatidylinositol in which the inositol ring is phosphorylated at the 3' position.	39.394% (13/33)	0.0053190160	2.27	YBR260C;YDL113C;YFR019W;YGL124C;YGR223C;YJL036W;YJR125C;YKR078W;YMR004W;YNR006W;YOR069W;YOR132W;YPL100W	RGD1;ATG20;FAB1;MON1;HSV2;SNX4;ENT3;;MVP1;VPS27;VPS5;VPS17;ATG21	MF	Activation
GO:0033218	amide binding	Interacting selectively and non-covalently with an amide, any derivative of an oxoacid in which an acidic hydroxy group has been replaced by an amino or substituted amino group.	28.814% (17/59)	0.0455345500	1.34	YBL040C;YBR115C;YCR069W;YDR519W;YGL016W;YGR159C;YHR098C;YHR174W;YIL137C;YJR009C;YKL068W;YML074C;YMR047C;YMR308C;YNL135C;YNR016C;YPR079W	ERD2;LYS2;CPR4;FPR2;KAP122;NSR1;SFB3;ENO2;TMA108;TDH2;NUP100;FPR3;NUP116;PSE1;FPR1;ACC1;MRL1	MF	Activation
GO:0004623	phospholipase A2 activity	Catalysis of the reaction: phosphatidylcholine + H2O = 1-acylglycerophosphocholine + a carboxylate.	62.5% (5/8)	0.0084352240	2.07	YGR110W;YKR089C;YMR008C;YNL012W;YOL011W	CLD1;TGL4;PLB1;SPO1;PLB3	MF	Activation
GO:0005085	guanyl-nucleotide exchange factor activity	Stimulates the exchange of guanyl nucleotides associated with a GTPase. Under normal cellular physiological conditions, the concentration of GTP is higher than that of GDP, favoring the replacement of GDP by GTP in association with the GTPase.	32.5% (13/40)	0.0302886700	1.52	YBL060W;YDL077C;YDR211W;YDR246W;YGL124C;YJR031C;YJR074W;YLR039C;YLR422W;YML003W;YML077W;YNL297C;YPR017C	YEL1;VAM6;GCD6;TRS23;MON1;GEA1;MOG1;RIC1;DCK1;;BET5;MON2;DSS4	MF	Activation
GO:0004857	enzyme inhibitor activity	Binds to and stops, prevents or reduces the activity of an enzyme.	34.043% (16/47)	0.0107870500	1.97	YBR214W;YDR014W-A;YDR283C;YDR322W;YEL019C;YER179W;YGR233C;YHR138C;YKR072C;YLR073C;YML051W;YML058W;YML109W;YMR258C;YMR273C;YPL111W	SDS24;HED1;GCN2;MRPL35;MMS21;DMC1;PHO81;;SIS2;RFU1;GAL80;SML1;ZDS2;ROY1;ZDS1;CAR1	MF	Activation
GO:0008144	drug binding	Interacting selectively and non-covalently with a drug, any naturally occurring or synthetic substance, other than a nutrient, that, when administered or applied to an organism, affects the structure or functioning of the organism; in particular, any such substance used in the diagnosis, prevention, or treatment of disease.	45.455% (5/11)	0.0419981100	1.38	YCR069W;YDR519W;YGR175C;YML074C;YNL135C	CPR4;FPR2;ERG1;FPR3;FPR1	MF	Activation
GO:0042910	xenobiotic transmembrane transporter activity	Enables the directed movement of a xenobiotic from one side of a membrane to the other. A xenobiotic is a compound foreign the organim exposed to it. It may be synthesized by another organism (like ampicilin) or it can be a synthetic chemical.	50% (8/16)	0.0051489840	2.29	YBR043C;YDR011W;YDR338C;YLL028W;YNL065W;YNR055C;YNR070W;YPR156C	QDR3;SNQ2;;TPO1;AQR1;HOL1;PDR18;TPO3	MF	Activation
GO:0043021	ribonucleoprotein complex binding	Interacting selectively and non-covalently with any complex of RNA and protein.	30.189% (16/53)	0.0344188400	1.46	YBR120C;YDR283C;YDR385W;YGL195W;YGR054W;YGR285C;YHR170W;YJL131C;YLL034C;YLR233C;YMR247C;YMR260C;YOL027C;YPL210C;YPL215W;YPR163C	CBP6;GCN2;EFT2;GCN1;;ZUO1;NMD3;AIM23;RIX7;EST1;RKR1;TIF11;MDM38;SRP72;CBP3;TIF3	MF	Activation
GO:0016592	mediator complex	A protein complex that interacts with the carboxy-terminal domain of the largest subunit of RNA polymerase II and plays an active role in transducing the signal from a transcription factor to the transcriptional machinery. The mediator complex is required for activation of transcription of most protein-coding genes, but can also act as a transcriptional corepressor. The Saccharomyces complex cont…	14.286% (4/28)	0.0449992600	1.35	YBR253W;YLR071C;YNR010W;YOR174W	SRB6;RGR1;CSE2;MED4	CC	Repression
GO:0005763	mitochondrial small ribosomal subunit	The smaller of the two subunits of a mitochondrial ribosome.	22.581% (7/31)	0.0005785115	3.24	YBR251W;YDL045W-A;YDR036C;YDR337W;YJR113C;YKL003C;YPL118W	MRPS5;MRP10;EHD3;MRPS28;RSM7;MRP17;MRP51	CC	Repression
GO:0005782	peroxisomal matrix	The volume contained within the membranes of a peroxisome; in many cells the matrix contains a crystalloid core largely composed of urate oxidase.	20% (3/15)	0.0337387700	1.47	YDR142C;YGL205W;YIR031C	PEX7;POX1;DAL7	CC	Repression
GO:0005785	signal recognition particle receptor complex	A transmembrane heterodimeric protein located in the membrane of the rough endoplasmic reticulum. Both subunits contain GTPase domains with which signal recognition particle interacts. In the presence of GTP and SRP receptor, SRP is released from the ribosome-nascent chain complex.	66.667% (2/3)	0.0068788530	2.16	YDR292C;YKL122C	SRP101;SRP21	CC	Repression
GO:0005786	signal recognition particle, endoplasmic reticulum targeting	A ribonucleoprotein particle of 325 kDa composed of a 7S (300 nucleotide) RNA molecule and a complex of six different polypeptides. This binds both to the N-terminal signal peptide for proteins destined for the endoplasmic reticulum as they emerge from the large ribosomal subunit and also to the ribosome. This binding arrests further translation thereby preventing the proteins from being released…	33.333% (2/6)	0.0311967900	1.51	YKL122C;YPL243W	SRP21;SRP68	CC	Repression
GO:0070847	core mediator complex	A protein complex that interacts with the carboxy-terminal domain of the largest subunit of RNA polymerase II and plays an active role in transducing the signal from a transcription factor to the transcriptional machinery. The core mediator complex has a stimulatory effect on basal transcription, and contains most of the same subdomains as the larger form of mediator complex -- a head domain comp…	21.053% (4/19)	0.0119835300	1.92	YBR253W;YLR071C;YNR010W;YOR174W	SRB6;RGR1;CSE2;MED4	CC	Repression
GO:0005667	transcription regulator complex	A protein complex that is capable of associating with DNA by direct binding, or via other DNA-binding proteins or complexes, and regulating transcription.	10% (10/100)	0.0230507500	1.64	YBR253W;YCR084C;YDL108W;YER171W;YLR071C;YMR236W;YMR270C;YNR010W;YOR174W;YPL007C	SRB6;TUP1;KIN28;RAD3;RGR1;TAF9;RRN9;CSE2;MED4;TFC8	CC	Repression
GO:0048500	signal recognition particle	A complex of protein and RNA which facilitates translocation of proteins across membranes.	33.333% (2/6)	0.0311967900	1.51	YKL122C;YPL243W	SRP21;SRP68	CC	Repression
GO:0046695	SLIK (SAGA-like) complex	A SAGA-type histone acetyltransferase complex that contains Rtg2 and a smaller form of Spt7 than the fungal SAGA complex, and lacks Spt8. The complex is involved in the yeast retrograde response pathway, which is important for gene expression changes during mitochondrial dysfunction.	18.75% (3/16)	0.0400678200	1.40	YMR223W;YMR236W;YPL254W	UBP8;TAF9;HFI1	CC	Repression
GO:0031907	microbody lumen	The volume enclosed by the membranes of a microbody.	20% (3/15)	0.0337387700	1.47	YDR142C;YGL205W;YIR031C	PEX7;POX1;DAL7	CC	Repression
GO:0032299	ribonuclease H2 complex	A protein complex that possesses ribonuclease H activity, in which the catalytic subunit is a member of the RNase H2 (or HII) class. For example, in Saccharomyces the complex contains Rnh201p, Rnh202p and Rnh203p.	66.667% (2/3)	0.0068788530	2.16	YDR279W;YLR154C	RNH202;RNH203	CC	Repression
GO:0045047	protein targeting to ER	The process of directing proteins towards the endoplasmic reticulum (ER) using signals contained within the protein. One common mechanism uses a 16- to 30-residue signal sequence, typically located at the N-terminus of the protein and containing positively charged amino acids followed by a continuous stretch of hydrophobic residues, which directs the ribosome to the ER membrane and initiates tran…	12.195% (5/41)	0.0478005000	1.32	YBR137W;YDR086C;YDR292C;YKL122C;YPL243W	;SSS1;SRP101;SRP21;SRP68	BP	Repression
GO:0046940	nucleoside monophosphate phosphorylation	The process of introducing one or more phosphate groups into a nucleoside monophosphate to produce a polyphosphorylated nucleoside.	28.571% (2/7)	0.0424747000	1.37	YDL166C;YKL024C	FAP7;URA6	BP	Repression
GO:0006370	7-methylguanosine mRNA capping	Addition of the 7-methylguanosine cap to the 5' end of a nascent messenger RNA transcript.	33.333% (3/9)	0.0077840230	2.11	YDL108W;YMR125W;YPL228W	KIN28;STO1;CET1	BP	Repression
GO:1900180	regulation of protein localization to nucleus	NA	18.75% (3/16)	0.0403097200	1.39	YGL190C;YMR001C;YPL228W	CDC55;CDC5;CET1	BP	Repression
GO:1900182	positive regulation of protein localization to nucleus	NA	33.333% (2/6)	0.0313359300	1.50	YGL190C;YPL228W	CDC55;CET1	BP	Repression
GO:0051304	chromosome separation	The cell cycle process in which paired chromosomes are detached from each other. Chromosome separation begins with the release of cohesin complexes from chromosomes; in budding yeast, this includes the cleavage of cohesin complexes along the chromosome arms, followed by the separation of the centromeric regions. Chromosome separation also includes formation of chromatid axes mediated by condensin…	11.29% (7/62)	0.0303898800	1.52	YDR118W;YGL116W;YGL190C;YIL031W;YLR272C;YLR383W;YMR001C	APC4;CDC20;CDC55;ULP2;YCS4;SMC6;CDC5	BP	Repression
GO:0045840	positive regulation of mitotic nuclear division	Any process that activates or increases the frequency, rate or extent of mitosis.	20.833% (5/24)	0.0053018020	2.28	YAL024C;YBR133C;YDR118W;YGL116W;YMR001C	LTE1;HSL7;APC4;CDC20;CDC5	BP	Repression
GO:1902440	protein localization to mitotic spindle pole body	NA	33.333% (2/6)	0.0313359300	1.50	YAL024C;YMR001C	LTE1;CDC5	BP	Repression
GO:0061136	regulation of proteasomal protein catabolic process	Any process that modulates the rate, frequency, or extent of the chemical reactions and pathways resulting in the breakdown of a protein or peptide by hydrolysis of its peptide bonds that is mediated by the proteasome.	17.647% (3/17)	0.0472309700	1.33	YDR411C;YGL116W;YOR117W	DFM1;CDC20;RPT5	BP	Repression
GO:0009416	response to light stimulus	Any process that results in a change in state or activity of a cell or an organism (in terms of movement, secretion, enzyme production, gene expression, etc.) as a result of a light stimulus, electromagnetic radiation of wavelengths classified as infrared, visible or ultraviolet light.	18.75% (3/16)	0.0403097200	1.39	YBR046C;YER171W;YJR035W	ZTA1;RAD3;RAD26	BP	Repression
GO:0140053	mitochondrial gene expression	NA	9.091% (13/143)	0.0218441900	1.66	YBR251W;YBR282W;YDL033C;YDL045W-A;YDR036C;YDR322W;YDR337W;YIR021W;YJR113C;YKL003C;YMR286W;YPL104W;YPL118W	MRPS5;MRPL27;SLM3;MRP10;EHD3;MRPL35;MRPS28;MRS1;RSM7;MRP17;MRPL33;MSD1;MRP51	BP	Repression
GO:0006613	cotranslational protein targeting to membrane	The targeting of proteins to a membrane that occurs during translation. The transport of most secretory proteins, particularly those with more than 100 amino acids, into the endoplasmic reticulum lumen occurs in this manner, as does the import of some proteins into mitochondria.	20% (4/20)	0.0145343600	1.84	YDR086C;YDR292C;YKL122C;YPL243W	SSS1;SRP101;SRP21;SRP68	BP	Repression
GO:0006614	SRP-dependent cotranslational protein targeting to membrane	The targeting of proteins to a membrane that occurs during translation and is dependent upon two key components, the signal-recognition particle (SRP) and the SRP receptor. SRP is a cytosolic particle that transiently binds to the endoplasmic reticulum (ER) signal sequence in a nascent protein, to the large ribosomal unit, and to the SRP receptor in the ER membrane.	20% (4/20)	0.0145343600	1.84	YDR086C;YDR292C;YKL122C;YPL243W	SSS1;SRP101;SRP21;SRP68	BP	Repression
GO:0006616	SRP-dependent cotranslational protein targeting to membrane, translocation	The process during cotranslational membrane targeting wherein proteins move across a membrane. SRP and its receptor initiate the transfer of the nascent chain across the endoplasmic reticulum (ER) membrane; they then dissociate from the chain, which is transferred to a set of transmembrane proteins, collectively called the translocon. Once the nascent chain translocon complex is assembled, the el…	17.647% (3/17)	0.0472309700	1.33	YDR086C;YKL122C;YPL243W	SSS1;SRP21;SRP68	BP	Repression
GO:0007266	Rho protein signal transduction	A series of molecular signals within the cell that are mediated by a member of the Rho family of proteins switching to a GTP-bound active state.	20.833% (5/24)	0.0053018020	2.28	YDL135C;YER155C;YMR001C;YNL180C;YOR008C	RDI1;BEM2;CDC5;RHO5;SLG1	BP	Repression
GO:0044088	regulation of vacuole organization	Any process that modulates the frequency, rate or extent of a process involved in the formation, arrangement of constituent parts, or disassembly of a vacuole.	14.286% (4/28)	0.0453305000	1.34	YDL077C;YDL135C;YGL190C;YPR194C	VAM6;RDI1;CDC55;OPT2	BP	Repression
GO:0000128	flocculation	The reversible, non-sexual aggregation of single-celled organisms in suspension to form aggregates of many cells known as flocs.	28.571% (2/7)	0.0424747000	1.37	YCR084C;YLR430W	TUP1;SEN1	BP	Repression
GO:0009112	nucleobase metabolic process	The chemical reactions and pathways involving a nucleobase, a nitrogenous base that is a constituent of a nucleic acid, e.g. the purines: adenine, guanine, hypoxanthine, xanthine and the pyrimidines: cytosine, uracil, thymine.	14.706% (5/34)	0.0233482600	1.63	YBR084W;YFR007W;YIR031C;YJR103W;YKL024C	MIS1;YFH7;DAL7;URA8;URA6	BP	Repression
GO:0016237	lysosomal microautophagy	The transfer of cytosolic components into the lysosomal compartment by direct invagination of the lysosomal membrane without prior sequestration into an autophagosome. The engulfing membranes fuse, resulting in the lysosomal delivery of the cargo wrapped in a single membrane derived from the invaginated lysosomal membrane. In S. cerevisiae, the vacuole is the lysosomal compartment.	13.462% (7/52)	0.0124648700	1.90	YDL077C;YGL190C;YGR163W;YGR223C;YHR073W;YHR171W;YJL012C	VAM6;CDC55;GTR2;HSV2;OSH3;ATG7;VTC4	BP	Repression
GO:0043137	DNA replication, removal of RNA primer	Removal of the Okazaki RNA primer from the lagging strand of replicating DNA, by a combination of the actions of DNA polymerase, DNA helicase and an endonuclease.	28.571% (2/7)	0.0424747000	1.37	YDR279W;YLR154C	RNH202;RNH203	BP	Repression
GO:1903778	protein localization to vacuolar membrane	NA	42.857% (3/7)	0.0034890220	2.46	YGL124C;YGR163W;YNL054W	MON1;GTR2;VAC7	BP	Repression
GO:0002143	tRNA wobble position uridine thiolation	The process in which a uridine residue at position 34 in the anticodon of a tRNA is post-transcriptionally thiolated at the C2 position. This process involves transfer of a sulfur from cysteine to position C2 by several steps.	33.333% (2/6)	0.0313359300	1.50	YDL033C;YIL008W	SLM3;URM1	BP	Repression
GO:0061919	process utilizing autophagic mechanism	A cellular process involving delivery of a portion of the cytoplasm to lysosomes or to the plant or fungal vacuole that does not involve direct transport through the endocytic or vacuolar protein sorting (Vps) pathways. This process typically leads to degradation of the cargo; however, it can also be used to deliver resident proteins, such as in the cytoplasm-to-vacuole targeting (Cvt) pathway.	8.636% (19/220)	0.0105478100	1.98	YDL077C;YDL108W;YDR246W;YGL124C;YGL190C;YGR120C;YGR163W;YGR223C;YHR073W;YHR171W;YIL065C;YJL012C;YKL006W;YLR272C;YLR356W;YNL051W;YOL018C;YOR008C;YPL140C	VAM6;KIN28;TRS23;MON1;CDC55;COG2;GTR2;HSV2;OSH3;ATG7;FIS1;VTC4;RPL14A;YCS4;ATG33;COG5;TLG2;SLG1;MKK2	BP	Repression
GO:0032543	mitochondrial translation	The chemical reactions and pathways resulting in the formation of a protein in a mitochondrion. This is a ribosome-mediated process in which the information in messenger RNA (mRNA) is used to specify the sequence of amino acids in the protein; the mitochondrion has its own ribosomes and transfer RNAs, and uses a genetic code that differs from the nuclear code.	9.244% (11/119)	0.0300987600	1.52	YBR251W;YBR282W;YDL045W-A;YDR036C;YDR322W;YDR337W;YJR113C;YKL003C;YMR286W;YPL104W;YPL118W	MRPS5;MRPL27;MRP10;EHD3;MRPL35;MRPS28;RSM7;MRP17;MRPL33;MSD1;MRP51	BP	Repression
GO:0002097	tRNA wobble base modification	The process in which the nucleotide at position 34 in the anticodon of a tRNA is post-transcriptionally modified.	14.815% (4/27)	0.0403482300	1.39	YDL033C;YIL008W;YLR384C;YNL132W	SLM3;URM1;IKI3;KRE33	BP	Repression
GO:0030162	regulation of proteolysis	Any process that modulates the frequency, rate or extent of the hydrolysis of a peptide bond or bonds within a protein.	12.195% (5/41)	0.0478005000	1.32	YDR322W;YDR411C;YER012W;YGL116W;YOR117W	MRPL35;DFM1;PRE1;CDC20;RPT5	BP	Repression
GO:0006206	pyrimidine nucleobase metabolic process	The chemical reactions and pathways involving pyrimidine nucleobases, 1,3-diazine, organic nitrogenous bases.	17.647% (3/17)	0.0472309700	1.33	YFR007W;YJR103W;YKL024C	YFH7;URA8;URA6	BP	Repression
GO:0030155	regulation of cell adhesion	Any process that modulates the frequency, rate or extent of attachment of a cell to another cell or to the extracellular matrix.	33.333% (2/6)	0.0313359300	1.50	YCR084C;YLR430W	TUP1;SEN1	BP	Repression
GO:0034227	tRNA thio-modification	The addition a sulfur atom to a nucleotide in a tRNA molecule.	28.571% (2/7)	0.0424747000	1.37	YDL033C;YIL008W	SLM3;URM1	BP	Repression
GO:1903827	regulation of cellular protein localization	NA	11.111% (6/54)	0.0465965500	1.33	YDR411C;YGL190C;YGR109C;YGR218W;YMR001C;YPL228W	DFM1;CDC55;CLB6;CRM1;CDC5;CET1	BP	Repression
GO:1903829	positive regulation of cellular protein localization	NA	20% (3/15)	0.0339453100	1.47	YGL190C;YMR001C;YPL228W	CDC55;CDC5;CET1	BP	Repression
GO:0006914	autophagy	The cellular catabolic process in which cells digest parts of their own cytoplasm; allows for both recycling of macromolecular constituents under conditions of cellular stress and remodeling the intracellular structure for cell differentiation.	8.095% (17/210)	0.0269066700	1.57	YDL077C;YDL108W;YDR246W;YGL124C;YGL190C;YGR120C;YGR163W;YGR223C;YHR073W;YHR171W;YIL065C;YJL012C;YKL006W;YLR272C;YLR356W;YOR008C;YPL140C	VAM6;KIN28;TRS23;MON1;CDC55;COG2;GTR2;HSV2;OSH3;ATG7;FIS1;VTC4;RPL14A;YCS4;ATG33;SLG1;MKK2	BP	Repression
GO:0008289	lipid binding	Interacting selectively and non-covalently with a lipid.	8.661% (11/127)	0.0450141300	1.35	YCR084C;YDL077C;YDL088C;YDR322W;YGL124C;YGL205W;YGR223C;YHR073W;YKL091C;YKL130C;YNL087W	TUP1;VAM6;ASM4;MRPL35;MON1;POX1;HSV2;OSH3;;SHE2;TCB2	MF	Repression
GO:0008379	thioredoxin peroxidase activity	Catalysis of the reaction: thioredoxin + hydrogen peroxide = thioredoxin disulfide + H2O.	28.571% (2/7)	0.0424127800	1.37	YBL064C;YBR037C	PRX1;SCO1	MF	Repression
GO:0008236	serine-type peptidase activity	Catalysis of the hydrolysis of peptide bonds in a polypeptide chain by a catalytic mechanism that involves a catalytic triad consisting of a serine nucleophile that is activated by a proton relay involving an acidic residue (e.g. aspartate or glutamate) and a basic residue (usually histidine).	21.429% (3/14)	0.0280906900	1.55	YGR101W;YNL123W;YNL238W	PCP1;NMA111;KEX2	MF	Repression
GO:0070122	isopeptidase activity	Catalysis of the hydrolysis of an isopeptide bond. An isopeptide bond is an amide linkage between a carboxyl group of one amino acid and an amino group of another amino acid in which at least one of these groups is not on the a-carbon of one of the amino acids (for example, the link between an epsilon-amino group of a lysine molecule to a carboxyl group on a second amino acid is an isopeptide bon…	40% (2/5)	0.0215474300	1.67	YFR004W;YIL031W	RPN11;ULP2	MF	Repression
GO:0005085	guanyl-nucleotide exchange factor activity	Stimulates the exchange of guanyl nucleotides associated with a GTPase. Under normal cellular physiological conditions, the concentration of GTP is higher than that of GDP, favoring the replacement of GDP by GTP in association with the GTPase.	12.766% (6/47)	0.0255618100	1.59	YAL003W;YAL024C;YDL077C;YDR246W;YER155C;YGL124C	EFB1;LTE1;VAM6;TRS23;BEM2;MON1	MF	Repression
GO:0004017	adenylate kinase activity	Catalysis of the reaction: ATP + AMP = 2 ADP.	33.333% (2/6)	0.0312894500	1.50	YDL166C;YKL024C	FAP7;URA6	MF	Repression
GO:0071949	FAD binding	Interacting selectively and non-covalently with the oxidized form, FAD, of flavin-adenine dinucleotide, the coenzyme or the prosthetic group of various flavoprotein oxidoreductase enzymes.	23.077% (3/13)	0.0228794500	1.64	YGL205W;YLR142W;YML130C	POX1;PUT1;ERO1	MF	Repression
GO:0019205	nucleobase-containing compound kinase activity	Catalysis of the transfer of a phosphate group, usually from ATP or GTP, to a nucleobase, nucleoside, nucleotide or polynucleotide substrate.	18.75% (3/16)	0.0402288700	1.40	YDL166C;YFR007W;YKL024C	FAP7;YFH7;URA6	MF	Repression
GO:0017171	serine hydrolase activity	Catalysis of the hydrolysis of a substrate by a catalytic mechanism that involves a catalytic triad consisting of a serine nucleophile that is activated by a proton relay involving an acidic residue (e.g. aspartate or glutamate) and a basic residue (usually histidine).	17.647% (3/17)	0.0471375500	1.33	YGR101W;YNL123W;YNL238W	PCP1;NMA111;KEX2	MF	Repression
GO:0003723	RNA binding	Interacting selectively and non-covalently with an RNA molecule or a portion thereof.	6.655% (38/571)	0.0273463500	1.56	YAL003W;YBR046C;YBR143C;YBR247C;YBR251W;YDL033C;YDL189W;YDR337W;YDR449C;YER155C;YFR031C-A;YGL014W;YGL031C;YGL078C;YGR030C;YGR218W;YIR021W;YJR014W;YJR113C;YKL003C;YKL006W;YKL025C;YKL122C;YKL130C;YLR009W;YLR165C;YLR384C;YLR430W;YMR125W;YMR128W;YMR302C;YNL132W;YOL123W;YOR004W;YOR206W;YOR354C;YPL243W;YPL249C-A	EFB1;ZTA1;SUP45;ENP1;MRPS5;SLM3;RBS1;MRPS28;UTP6;BEM2;RPL2A;PUF4;RPL24A;DBP3;POP6;CRM1;MRS1;TMA22;RSM7;MRP17;RPL14A;PAN3;SRP21;SHE2;RLP24;PUS5;IKI3;SEN1;STO1;ECM16;YME2;KRE33;HRP1;UTP23;NOC2;MSC6;SRP68;RPL36B	MF	Repression
GO:0016776	phosphotransferase activity, phosphate group as acceptor	Catalysis of the transfer of a phosphorus-containing group from one compound (donor) to a phosphate group (acceptor).	18.75% (3/16)	0.0402288700	1.40	YDL166C;YJL012C;YKL024C	FAP7;VTC4;URA6	MF	Repression
GO:0003735	structural constituent of ribosome	The action of a molecule that contributes to the structural integrity of the ribosome.	9.645% (19/197)	0.0032044090	2.49	YBR251W;YBR282W;YDL045W-A;YDR036C;YDR322W;YDR337W;YFR031C-A;YGL031C;YJR113C;YKL003C;YKL006W;YLR009W;YLR367W;YMR242C;YMR286W;YOL039W;YOR096W;YPL118W;YPL249C-A	MRPS5;MRPL27;MRP10;EHD3;MRPL35;MRPS28;RPL2A;RPL24A;RSM7;MRP17;RPL14A;RLP24;RPS22B;RPL20A;MRPL33;RPP2A;RPS7A;MRP51;RPL36B	MF	Repression
GO:0044877	protein-containing complex binding	Interacting selectively and non-covalently with a macromolecular complex.	7.729% (16/207)	0.0447205400	1.35	YBR082C;YCR084C;YDR097C;YDR292C;YDR411C;YER071C;YFR004W;YGL116W;YJR014W;YKL122C;YMR001C;YNL001W;YNL031C;YNL079C;YNR040W;YPL243W	UBC4;TUP1;MSH6;SRP101;DFM1;TDA2;RPN11;CDC20;TMA22;SRP21;CDC5;DOM34;HHT2;TPM1;;SRP68	MF	Repression
GO:0004252	serine-type endopeptidase activity	Catalysis of the hydrolysis of internal, alpha-peptide bonds in a polypeptide chain by a catalytic mechanism that involves a catalytic triad consisting of a serine nucleophile that is activated by a proton relay involving an acidic residue (e.g. aspartate or glutamate) and a basic residue (usually histidine).	27.273% (3/11)	0.0141881300	1.85	YGR101W;YNL123W;YNL238W	PCP1;NMA111;KEX2	MF	Repression

## Sheet: SCUTS_TopGO
GO_ID	Term	Definition	Genes_frequency	Pvalue	Pvalue_(-log10)	Significant_genes	Significant_genes_symbol	Category_ID	Library
GO:0042144	vacuole fusion, non-autophagic	The fusion of two vacuole membranes to form a single vacuole.	11.765% (4/34)	0.001923292	2.72	YJL012C;YLR396C;YNL015W;YPR194C	VTC4;VPS33;PBI2;OPT2	BP	Activation
GO:0010951	negative regulation of endopeptidase activity	Any process that decreases the frequency, rate or extent of endopeptidase activity, the endohydrolysis of peptide bonds within proteins.	40% (2/5)	0.002435360	2.61	YMR174C;YNL015W	PAI3;PBI2	BP	Activation
GO:0006914	autophagy	The cellular catabolic process in which cells digest parts of their own cytoplasm; allows for both recycling of macromolecular constituents under conditions of cellular stress and remodeling the intracellular structure for cell differentiation.	4.372% (8/183)	0.008105508	2.09	YDL137W;YGL210W;YGR120C;YJL012C;YJL127C;YKR068C;YLR396C;YNL098C	ARF2;YPT32;COG2;VTC4;SPT10;BET3;VPS33;RAS2	BP	Activation
GO:0007124	pseudohyphal growth	A pattern of cell growth that occurs in conditions of nitrogen limitation and abundant fermentable carbon source. Cells become elongated, switch to a unipolar budding pattern, remain physically attached to each other, and invade the growth substrate.	7.843% (4/51)	0.008457906	2.07	YDL024C;YER177W;YMR016C;YNL098C	DIA3;BMH1;SOK2;RAS2	BP	Activation
GO:0030307	positive regulation of cell growth	Any process that activates or increases the frequency, rate, extent or direction of cell growth.	18.182% (2/11)	0.012589670	1.90	YNL098C;YPR194C	RAS2;OPT2	BP	Activation
GO:0001402	signal transduction involved in filamentous growth	Relaying of environmental signals promoting filamentous growth.	16.667% (2/12)	0.014953010	1.83	YER177W;YGR040W	BMH1;KSS1	BP	Activation
GO:0006797	polyphosphate metabolic process	The chemical reactions and pathways involving a polyphosphate, the anion or salt of polyphosphoric acid.	16.667% (2/12)	0.014953010	1.83	YHR201C;YJL012C	PPX1;VTC4	BP	Activation
GO:0048388	endosomal lumen acidification	Any process that reduces the pH of the endosomal lumen, measured by the concentration of the hydrogen ion.	14.286% (2/14)	0.020197990	1.69	YLR447C;YPR036W	VMA6;VMA13	BP	Activation
GO:0061795	Golgi lumen acidification	Any process that reduces the pH of the Golgi lumen, measured by the concentration of the hydrogen ion.	14.286% (2/14)	0.020197990	1.69	YLR447C;YPR036W	VMA6;VMA13	BP	Activation
GO:0000291	nuclear-transcribed mRNA catabolic process, exonucleolytic	The chemical reactions and pathways resulting in the breakdown of the transcript body of a nuclear-transcribed mRNA that occurs when the ends are not protected by the 5'-cap or the 3'-poly(A) tail.	12.5% (2/16)	0.026094650	1.58	YDR404C;YGR158C	RPB7;MTR3	BP	Activation
GO:0043966	histone H3 acetylation	The modification of histone H3 by the addition of an acetyl group.	12.5% (2/16)	0.026094650	1.58	YJL127C;YPR193C	SPT10;HPA2	BP	Activation
GO:0031338	regulation of vesicle fusion	Any process that modulates the frequency, rate or extent of vesicle fusion.	12.5% (2/16)	0.026094650	1.58	YLR396C;YOL112W	VPS33;MSB4	BP	Activation
GO:0007034	vacuolar transport	The directed movement of substances into, out of or within a vacuole.	4.082% (6/147)	0.028830500	1.54	YGR120C;YJL012C;YKR068C;YLR396C;YLR447C;YNL098C	COG2;VTC4;BET3;VPS33;VMA6;RAS2	BP	Activation
GO:0010674	negative regulation of transcription from RNA polymerase II promoter involved in meiotic cell cycle	Any process that decreases the frequency, rate or extent of transcription from an RNA polymerase II promoter as part of the meiotic cell cycle.	50% (1/2)	0.031678420	1.50	YOR229W	WTM2	BP	Activation
GO:0045762	positive regulation of adenylate cyclase activity	Any process that activates or increases the frequency, rate or extent of adenylate cyclase activity.	50% (1/2)	0.031678420	1.50	YNL098C	RAS2	BP	Activation
GO:0051510	regulation of unidimensional cell growth	Any process that modulates the frequency, rate or extent of unidimensional cell growth, the process in which a cell irreversibly increases in size in one [spatial] dimension or along one axis.	50% (1/2)	0.031678420	1.50	YPR194C	OPT2	BP	Activation
GO:0017055	negative regulation of RNA polymerase II transcription preinitiation complex assembly	Any process that stops, prevents, or reduces the frequency, rate or extent of RNA polymerase II transcriptional preinitiation complex assembly.	50% (1/2)	0.031678420	1.50	YDR397C	NCB2	BP	Activation
GO:2000812	regulation of barbed-end actin filament capping	NA	50% (1/2)	0.031678420	1.50	YER071C	TDA2	BP	Activation
GO:2000813	negative regulation of barbed-end actin filament capping	NA	50% (1/2)	0.031678420	1.50	YER071C	TDA2	BP	Activation
GO:0031281	positive regulation of cyclase activity	Any process that activates or increases the activity of a cyclase.	50% (1/2)	0.031678420	1.50	YNL098C	RAS2	BP	Activation
GO:0051349	positive regulation of lyase activity	Any process that activates or increases the frequency, rate or extent of lyase activity, the catalysis of the cleavage of C-C, C-O, C-N and other bonds by other means than by hydrolysis or oxidation, or conversely adding a group to a double bond.	50% (1/2)	0.031678420	1.50	YNL098C	RAS2	BP	Activation
GO:1901334	lactone metabolic process	NA	50% (1/2)	0.031678420	1.50	YML086C	ALO1	BP	Activation
GO:1901336	lactone biosynthetic process	NA	50% (1/2)	0.031678420	1.50	YML086C	ALO1	BP	Activation
GO:0010973	positive regulation of division septum assembly	Any process that increases the frequency, rate or extent of division septum formation. division septum formation is the assembly and arrangement of a septum that spans the plasma membrane interface between progeny cells following cytokinesis.	50% (1/2)	0.031678420	1.50	YGR040W	KSS1	BP	Activation
GO:0070484	dehydro-D-arabinono-1,4-lactone metabolic process	The chemical reactions and pathways involving dehydro-D-arabinono-1,4-lactone, the gamma-lactone (5R)-3,4-dihydroxy-5-(hydroxymethyl)furan-2(5H)-one.	50% (1/2)	0.031678420	1.50	YML086C	ALO1	BP	Activation
GO:0070485	dehydro-D-arabinono-1,4-lactone biosynthetic process	The chemical reactions and pathways resulting in the formation of dehydro-D-arabinono-1,4-lactone, the gamma-lactone (5R)-3,4-dihydroxy-5-(hydroxymethyl)furan-2(5H)-one.	50% (1/2)	0.031678420	1.50	YML086C	ALO1	BP	Activation
GO:0010118	stomatal movement	The process of opening or closing of stomata, which is directly related to the stomatal conductance (measuring rate of passage of either water vapor or carbon dioxide (CO2) through stomata).	50% (1/2)	0.031678420	1.50	YGL080W	MPC1	BP	Activation
GO:0010119	regulation of stomatal movement	Any process that modulates the frequency, rate or extent of stomatal movement.	50% (1/2)	0.031678420	1.50	YGL080W	MPC1	BP	Activation
GO:0051469	vesicle fusion with vacuole	The joining of the lipid bilayer membrane around a vesicle with the lipid bilayer membrane around the vacuole.	50% (1/2)	0.031678420	1.50	YLR396C	VPS33	BP	Activation
GO:0006824	cobalt ion transport	The directed movement of cobalt (Co) ions into, out of or within a cell, or between cells, by means of some agent such as a transporter or pore.	50% (1/2)	0.031678420	1.50	YHR050W	SMF2	BP	Activation
GO:0031333	negative regulation of protein-containing complex assembly	Any process that stops, prevents, or reduces the frequency, rate or extent of protein complex assembly.	11.111% (2/18)	0.032597670	1.49	YDR397C;YER071C	NCB2;TDA2	BP	Activation
GO:0016050	vesicle organization	A process that is carried out at the cellular level which results in the assembly, arrangement of constituent parts, or disassembly of a vesicle.	4.348% (5/115)	0.035591320	1.45	YGR241C;YLR396C;YLR447C;YOL112W;YPR036W	YAP1802;VPS33;VMA6;MSB4;VMA13	BP	Activation
GO:0045815	positive regulation of gene expression, epigenetic	Any epigenetic process that activates or increases the rate of gene expression.	10.526% (2/19)	0.036062990	1.44	YKL160W;YOR229W	ELF1;WTM2	BP	Activation
GO:0045927	positive regulation of growth	Any process that activates or increases the rate or extent of growth, the increase in size or mass of all or part of an organism.	10.526% (2/19)	0.036062990	1.44	YNL098C;YPR194C	RAS2;OPT2	BP	Activation
GO:0000122	negative regulation of transcription by RNA polymerase II	Any process that stops, prevents, or reduces the frequency, rate or extent of transcription mediated by RNA polymerase II.	4.202% (5/119)	0.040351630	1.39	YDR397C;YER177W;YJL127C;YOL113W;YOR229W	NCB2;BMH1;SPT10;SKM1;WTM2	BP	Activation
GO:0032258	cytoplasm to vacuole transport by the Cvt pathway	A cytoplasm to vacuole targeting pathway that uses machinery common with autophagy. The Cvt vesicle is formed when the receptor protein, Atg19, binds to the complexes of the target protein (aminopeptidase or alpha-mannosidase homododecamers), forming the Cvt complex. Atg11 binds to Atg9 and transports the Cvt complex to the pre-autophagosome (PAS). The phagophore membrane expands around the Cvt c…	6.25% (3/48)	0.040408260	1.39	YGR120C;YKR068C;YNL098C	COG2;BET3;RAS2	BP	Activation
GO:0006887	exocytosis	A process of secretion by a cell that results in the release of intracellular molecules (e.g. hormones, matrix proteins) contained within a membrane-bounded vesicle. Exocytosis can occur either by full fusion, when the vesicle collapses into the plasma membrane, or by a kiss-and-run mechanism that involves the formation of a transient contact, a pore, between a granule (for exemple of chromaffin …	6% (3/50)	0.044778030	1.35	YGL210W;YLR396C;YOL112W	YPT32;VPS33;MSB4	BP	Activation
GO:0060633	negative regulation of transcription initiation from RNA polymerase II promoter	Any process that decreases the rate, frequency or extent of a process involved in starting transcription from an RNA polymerase II promoter.	33.333% (1/3)	0.047144670	1.33	YDR397C	NCB2	BP	Activation
GO:0009180	purine ribonucleoside diphosphate biosynthetic process	The chemical reactions and pathways resulting in the formation of purine ribonucleoside diphosphate, a compound consisting of a purine base linked to a ribose sugar esterified with diphosphate on the sugar.	33.333% (1/3)	0.047144670	1.33	YDR454C	GUK1	BP	Activation
GO:0048638	regulation of developmental growth	Any process that modulates the frequency, rate or extent of developmental growth.	33.333% (1/3)	0.047144670	1.33	YPR194C	OPT2	BP	Activation
GO:0061736	engulfment of target by autophagosome	The membrane invagination process by which an autophagosomal membrane surrounds an object that will be degraded by macroautophagy.	33.333% (1/3)	0.047144670	1.33	YJL012C	VTC4	BP	Activation
GO:0009136	purine nucleoside diphosphate biosynthetic process	The chemical reactions and pathways resulting in the formation of purine nucleoside diphosphate, a compound consisting of a purine base linked to a ribose or deoxyribose sugar esterified with diphosphate on the sugar.	33.333% (1/3)	0.047144670	1.33	YDR454C	GUK1	BP	Activation
GO:0016480	negative regulation of transcription by RNA polymerase III	Any process that stops, prevents, or reduces the frequency, rate or extent of transcription mediated by RNA polymerase III.	33.333% (1/3)	0.047144670	1.33	YDR397C	NCB2	BP	Activation
GO:0097043	histone H3-K56 acetylation	The modification of histone H3 by the addition of an acetyl group to a lysine residue at position 56 of the histone.	33.333% (1/3)	0.047144670	1.33	YJL127C	SPT10	BP	Activation
GO:0046466	membrane lipid catabolic process	The chemical reactions and pathways resulting in the breakdown of membrane lipids, any lipid found in or associated with a biological membrane.	33.333% (1/3)	0.047144670	1.33	YPL087W	YDC1	BP	Activation
GO:0048016	inositol phosphate-mediated signaling	Any intracellular signal transduction in which the signal is passed on within the cell via an inositol phosphate. Includes production of the inositol phosphate, and downstream effectors that further transmit the signal within the cell. Inositol phosphates are a group of mono- to poly-phosphorylated inositols, and include inositol monophosphate (IP), inositol trisphosphate (IP3), inositol pentakis…	33.333% (1/3)	0.047144670	1.33	YJL012C	VTC4	BP	Activation
GO:0044088	regulation of vacuole organization	Any process that modulates the frequency, rate or extent of a process involved in the formation, arrangement of constituent parts, or disassembly of a vacuole.	9.091% (2/22)	0.047252150	1.33	YLR396C;YPR194C	VPS33;OPT2	BP	Activation
GO:0030149	sphingolipid catabolic process	The chemical reactions and pathways resulting in the breakdown of sphingolipids, any of a class of lipids containing the long-chain amine diol sphingosine or a closely related base (a sphingoid).	33.333% (1/3)	0.047144670	1.33	YPL087W	YDC1	BP	Activation
GO:2000143	negative regulation of DNA-templated transcription, initiation	NA	33.333% (1/3)	0.047144670	1.33	YDR397C	NCB2	BP	Activation
GO:0006799	polyphosphate biosynthetic process	The chemical reactions and pathways resulting in the formation of a polyphosphate, the anion or salt of polyphosphoric acid.	33.333% (1/3)	0.047144670	1.33	YJL012C	VTC4	BP	Activation
GO:0044042	glucan metabolic process	The chemical reactions and pathways involving glucans, polysaccharides consisting only of glucose residues.	5.882% (3/51)	0.047048040	1.33	YDR221W;YER177W;YHL012W	GTB1;BMH1;	BP	Activation
GO:0046160	heme a metabolic process	The chemical reactions and pathways involving heme a, a derivative of heme found in cytochrome aa3.	33.333% (1/3)	0.047144670	1.33	YPL172C	COX10	BP	Activation
GO:0006784	heme A biosynthetic process	The chemical reactions and pathways resulting in the formation of heme A, a derivative of heme found in cytochrome aa3.	33.333% (1/3)	0.047144670	1.33	YPL172C	COX10	BP	Activation
GO:0070841	inclusion body assembly	The aggregation, arrangement and bonding together of a set of components to form an inclusion body.	33.333% (1/3)	0.047144670	1.33	YER177W	BMH1	BP	Activation
GO:0006073	cellular glucan metabolic process	The chemical reactions and pathways involving glucans, polysaccharides consisting only of glucose residues, occurring at the level of an individual cell.	5.882% (3/51)	0.047048040	1.33	YDR221W;YER177W;YHL012W	GTB1;BMH1;	BP	Activation
GO:0048268	clathrin coat assembly	The process that results in the assembly of clathrin triskelia into the ordered structure known as a clathrin cage.	33.333% (1/3)	0.047144670	1.33	YGR241C	YAP1802	BP	Activation
GO:0051038	negative regulation of transcription involved in meiotic cell cycle	Any process that stops, prevents, or reduces the frequency, rate or extent of transcription involved in the meiotic cell cycle.	33.333% (1/3)	0.047144670	1.33	YOR229W	WTM2	BP	Activation
GO:0005773	vacuole	A closed structure, found only in eukaryotic cells, that is completely surrounded by unit membrane and contains liquid material. Cells contain one or several vacuoles, that may have different functions from each other. Vacuoles have a diverse array of functions. They can act as a storage organelle for nutrients or waste products, as a degradative compartment, as a cost-effective way of increasing…	3.448% (13/377)	0.004972653	2.30	YDL180W;YGL080W;YHL042W;YHR050W;YJL012C;YLR042C;YLR396C;YLR447C;YMR174C;YNL015W;YPL087W;YPR036W;YPR194C	;MPC1;;SMF2;VTC4;;VPS33;VMA6;PAI3;PBI2;YDC1;VMA13;OPT2	CC	Activation
GO:0005768	endosome	A vacuole to which materials ingested by endocytosis are delivered.	4.268% (7/164)	0.013563970	1.87	YGL210W;YHL042W;YHR050W;YKR068C;YLR396C;YLR447C;YPR036W	YPT32;;SMF2;BET3;VPS33;VMA6;VMA13	CC	Activation
GO:0005794	Golgi apparatus	A membrane-bound cytoplasmic organelle of the endomembrane system that further processes the core oligosaccharides (e.g. N-glycans) added to proteins in the endoplasmic reticulum and packages them into membrane-bound vesicles. The Golgi apparatus operates at the intersection of the secretory, lysosomal, and endocytic pathways.	3.571% (9/252)	0.015867280	1.80	YDL137W;YGL210W;YGR120C;YHR050W;YKR068C;YLR447C;YPL087W;YPR036W;YPR194C	ARF2;YPT32;COG2;SMF2;BET3;VMA6;YDC1;VMA13;OPT2	CC	Activation
GO:0099023	vesicle tethering complex	Any protein complex that plays a role in vesicle tethering.	8.571% (3/35)	0.016877070	1.77	YGR120C;YKR068C;YLR396C	COG2;BET3;VPS33	CC	Activation
GO:0005774	vacuolar membrane	The lipid bilayer surrounding the vacuole and separating its contents from the cytoplasm of the cell.	3.604% (8/222)	0.021665260	1.66	YDL180W;YGL080W;YHR050W;YJL012C;YLR396C;YLR447C;YPL087W;YPR036W	;MPC1;SMF2;VTC4;VPS33;VMA6;YDC1;VMA13	CC	Activation
GO:0033176	proton-transporting V-type ATPase complex	A proton-transporting two-sector ATPase complex that couples ATP hydrolysis to the transport of protons across a concentration gradient. The resulting transmembrane electrochemical potential of H+ is used to drive a variety of (i) secondary active transport systems via H+-dependent symporters and antiporters and (ii) channel-mediated transport systems. The complex comprises a membrane sector (V0)…	13.333% (2/15)	0.022308680	1.65	YLR447C;YPR036W	VMA6;VMA13	CC	Activation
GO:0016471	vacuolar proton-transporting V-type ATPase complex	A proton-transporting two-sector ATPase complex found in the vacuolar membrane, where it acts as a proton pump to mediate acidification of the vacuolar lumen.	13.333% (2/15)	0.022308680	1.65	YLR447C;YPR036W	VMA6;VMA13	CC	Activation
GO:0005788	endoplasmic reticulum lumen	The volume enclosed by the membranes of the endoplasmic reticulum.	12.5% (2/16)	0.025240600	1.60	YDR221W;YGR263C	GTB1;SAY1	CC	Activation
GO:0071944	cell periphery	The part of a cell encompassing the cell cortex, the plasma membrane, and any external encapsulating structures.	2.576% (16/621)	0.027660340	1.56	YDL024C;YDL137W;YER071C;YER177W;YGL080W;YGR121C;YGR241C;YGR263C;YHR050W;YHR201C;YJL012C;YLR042C;YNL098C;YOL112W;YOL113W;YPR194C	DIA3;ARF2;TDA2;BMH1;MPC1;MEP1;YAP1802;SAY1;SMF2;PPX1;VTC4;;RAS2;MSB4;SKM1;OPT2	CC	Activation
GO:0008023	transcription elongation factor complex	Any protein complex that interacts with RNA polymerase II to increase (positive transcription elongation factor) or reduce (negative transcription elongation factor) the rate of transcription elongation.	11.765% (2/17)	0.028320200	1.55	YKL160W;YNL230C	ELF1;ELA1	CC	Activation
GO:0000322	storage vacuole	A vacuole that functions primarily in the storage of materials, including nutrients, pigments, waste products, and small molecules.	3.077% (10/325)	0.028619560	1.54	YDL180W;YHL042W;YJL012C;YLR042C;YLR396C;YLR447C;YNL015W;YPL087W;YPR036W;YPR194C	;;VTC4;;VPS33;VMA6;PBI2;YDC1;VMA13;OPT2	CC	Activation
GO:0000324	fungal-type vacuole	A vacuole that has both lytic and storage functions. The fungal vacuole is a large, membrane-bounded organelle that functions as a reservoir for the storage of small molecules (including polyphosphate, amino acids, several divalent cations (e.g. calcium), other ions, and other small molecules) as well as being the primary compartment for degradation. It is an acidic compartment, containing an ens…	3.077% (10/325)	0.028619560	1.54	YDL180W;YHL042W;YJL012C;YLR042C;YLR396C;YLR447C;YNL015W;YPL087W;YPR036W;YPR194C	;;VTC4;;VPS33;VMA6;PBI2;YDC1;VMA13;OPT2	CC	Activation
GO:0000323	lytic vacuole	A vacuole that is maintained at an acidic pH and which contains degradative enzymes, including a wide variety of acid hydrolases.	3.058% (10/327)	0.029705160	1.53	YDL180W;YHL042W;YJL012C;YLR042C;YLR396C;YLR447C;YNL015W;YPL087W;YPR036W;YPR194C	;;VTC4;;VPS33;VMA6;PBI2;YDC1;VMA13;OPT2	CC	Activation
GO:0110131	Aim21-Tda2 complex	A complex that localizes to actin cortical patches at sites of endocytosis and negatively regulates barbed end F-actin assembly, resulting in the generation of free actin pools. The Aim21-Tda2 complex is necessary for efficient endocytosis and balancing the distribution of actin between patches and cables.	50% (1/2)	0.031122930	1.51	YER071C	TDA2	CC	Activation
GO:0070449	elongin complex	A transcription elongation factor complex that suppresses RNA polymerase II pausing, and may act by promoting proper alignment of the 3'-end of nascent transcripts with the polymerase catalytic site. Consists of a transcriptionally active Elongin A subunit (about 100 kDa) and two smaller Elongin B (about 18 kDa) and Elongin C (about 15 kDa) subunits.	50% (1/2)	0.031122930	1.51	YNL230C	ELA1	CC	Activation
GO:0017177	glucosidase II complex	A heterodimeric complex that catalyzes the trimming of glucose residues from N-linked core glycans on newly synthesized glycoproteins.	50% (1/2)	0.031122930	1.51	YDR221W	GTB1	CC	Activation
GO:1990328	RPB4-RPB7 complex	NA	50% (1/2)	0.031122930	1.51	YDR404C	RPB7	CC	Activation
GO:0034715	pICln-Sm protein complex	A protein complex that contains pICln (CLNS1A) and several Sm proteins, including SmD1, SmD2, SmE, SmF, and SmG.	50% (1/2)	0.031122930	1.51	YLR147C	SMD3	CC	Activation
GO:0034719	SMN-Sm protein complex	A protein complex formed by the association of several methylated Sm proteins with the SMN complex; the latter contains the survival motor neuron (SMN) protein and at least eight additional integral components, including the Gemin2-8 and unrip proteins; additional proteins, including galectin-1 and galectin-3, are also found in the SMN-SM complex. The SMN-Sm complex is involved in spliceosomal sn…	50% (1/2)	0.031122930	1.51	YLR147C	SMD3	CC	Activation
GO:0005971	ribonucleoside-diphosphate reductase complex	An enzyme complex composed of 2-4 or more subunits, which usually contains nonheme iron and requires ATP for catalysis. Catalyzes the formation of 2'-deoxyribonucleoside diphosphate from ribonucleoside diphosphate, using either thioredoxin disulfide or glutaredoxin disulfide as an acceptor.	50% (1/2)	0.031122930	1.51	YER070W	RNR1	CC	Activation
GO:0017054	negative cofactor 2 complex	A heterodimeric protein complex that can stably associate with TATA-binding protein on promoters, thereby preventing the assembly of transcription factors TFIIA and TFIIB and leading to repression of RNA polymerase II transcription. The two subunits, NC2alpha (Drap1) and NC2beta (Dr1), dimerize through histone fold domains of the H2A/H2B type present in the amino termini.	50% (1/2)	0.031122930	1.51	YDR397C	NCB2	CC	Activation
GO:0012505	endomembrane system	A collection of membranous structures involved in transport within the cell. The main components of the endomembrane system are endoplasmic reticulum, Golgi bodies, vesicles, cell membrane and nuclear envelope. Members of the endomembrane system pass materials through each other or though the use of vesicles.	2.323% (20/861)	0.037465970	1.43	YDL137W;YDR221W;YDR532C;YER019C-A;YGL210W;YGR120C;YGR121C;YGR241C;YGR263C;YHL042W;YHR050W;YJL012C;YKR068C;YLR396C;YLR447C;YNL098C;YOL112W;YPL087W;YPR036W;YPR194C	ARF2;GTB1;KRE28;SBH2;YPT32;COG2;MEP1;YAP1802;SAY1;;SMF2;VTC4;BET3;VPS33;VMA6;RAS2;MSB4;YDC1;VMA13;OPT2	CC	Activation
GO:0031410	cytoplasmic vesicle	A vesicle found in the cytoplasm of a cell.	3.113% (8/257)	0.046129890	1.34	YGL210W;YGR241C;YHL042W;YHR050W;YKR068C;YLR396C;YLR447C;YPR036W	YPT32;YAP1802;;SMF2;BET3;VPS33;VMA6;VMA13	CC	Activation
GO:0097708	intracellular vesicle	Any vesicle that is part of the intracellular region.	3.113% (8/257)	0.046129890	1.34	YGL210W;YGR241C;YHL042W;YHR050W;YKR068C;YLR396C;YLR447C;YPR036W	YPT32;YAP1802;;SMF2;BET3;VPS33;VMA6;VMA13	CC	Activation
GO:0071261	Ssh1 translocon complex	A translocon complex that contains a core heterotrimer of alpha, beta and gamma subunits, and may contain additional proteins (translocon-associated proteins or TRAPs); in budding yeast the core proteins are Ssh1p, Sbh2p, and Sss1p. The Ssh1 translocon complex is involved in the cotranslational pathway of protein transport across the ER membrane, and recognizes proteins bearing strongly hydrophob…	33.333% (1/3)	0.046324510	1.33	YER019C-A	SBH2	CC	Activation
GO:0120124	membrane fusion priming complex	A protein complex that primes vacuolar or vesicular membranes for fusion with other intracellular membranes, by promoting the dissociation of cis-SNARE complexes.	33.333% (1/3)	0.046324510	1.33	YNL015W	PBI2	CC	Activation
GO:0033254	vacuolar transporter chaperone complex	A protein complex that contains four related proteins that have been implicated in several membrane-related processes, such as sorting of H+-translocating ATPases, endocytosis, ER-Golgi trafficking, vacuole fusion, vacuolar polyphosphate homeostasis and the microautophagic scission of vesicles into the vacuolar lumen. The complex is enriched at the vacuolar membrane, but also found in other cellu…	33.333% (1/3)	0.046324510	1.33	YJL012C	VTC4	CC	Activation
GO:0005765	lysosomal membrane	The lipid bilayer surrounding the lysosome and separating its contents from the cell cytoplasm.	33.333% (1/3)	0.046324510	1.33	YLR447C	VMA6	CC	Activation
GO:0005689	U12-type spliceosomal complex	Any spliceosomal complex that forms during the splicing of a messenger RNA primary transcript to excise an intron; the series of U12-type spliceosomal complexes is involved in the splicing of the majority of introns that contain atypical AT-AC terminal dinucleotides, as well as other non-canonical introns. The entire splice site signal, not just the terminal dinucleotides, is involved in determin…	33.333% (1/3)	0.046324510	1.33	YLR147C	SMD3	CC	Activation
GO:0004866	endopeptidase inhibitor activity	Stops, prevents or reduces the activity of an endopeptidase, any enzyme that hydrolyzes nonterminal peptide bonds in polypeptides.	40% (2/5)	0.002433142	2.61	YMR174C;YNL015W	PAI3;PBI2	MF	Activation
GO:0016614	oxidoreductase activity, acting on CH-OH group of donors	Catalysis of an oxidation-reduction (redox) reaction in which a CH-OH group act as a hydrogen or electron donor and reduces a hydrogen or electron acceptor.	6.667% (4/60)	0.014806200	1.83	YIL094C;YKR009C;YML086C;YPL088W	LYS12;FOX2;ALO1;	MF	Activation
GO:0016776	phosphotransferase activity, phosphate group as acceptor	Catalysis of the transfer of a phosphorus-containing group from one compound (donor) to a phosphate group (acceptor).	14.286% (2/14)	0.020180470	1.70	YDR454C;YJL012C	GUK1;VTC4	MF	Activation
GO:0003924	GTPase activity	Catalysis of the reaction: GTP + H2O = GDP + phosphate.	5.797% (4/69)	0.023595890	1.63	YDL137W;YGL210W;YHR168W;YNL098C	ARF2;YPT32;MTG2;RAS2	MF	Activation
GO:0004311	farnesyltranstransferase activity	Catalysis of the reaction: 2-trans,6-trans-farnesyl diphosphate + isopentenyl diphosphate = diphosphate + geranylgeranyl diphosphate.	50% (1/2)	0.031663890	1.50	YPL172C	COX10	MF	Activation
GO:0032050	clathrin heavy chain binding	Interacting selectively and non-covalently with a clathrin heavy chain.	50% (1/2)	0.031663890	1.50	YGR241C	YAP1802	MF	Activation
GO:0004867	serine-type endopeptidase inhibitor activity	Stops, prevents or reduces the activity of serine-type endopeptidases, enzymes that catalyze the hydrolysis of nonterminal peptide bonds in a polypeptide chain; a serine residue (and a histidine residue) are at the active center of the enzyme.	50% (1/2)	0.031663890	1.50	YNL015W	PBI2	MF	Activation
GO:0032931	histone acetyltransferase activity (H3-K56 specific)	Catalysis of the reaction: acetyl-CoA + histone H3 L-lysine (position 56) = CoA + histone H3 N6-acetyl-L-lysine (position 56).	50% (1/2)	0.031663890	1.50	YJL127C	SPT10	MF	Activation
GO:0004748	ribonucleoside-diphosphate reductase activity, thioredoxin disulfide as acceptor	Catalysis of the reaction: 2'-deoxyribonucleoside diphosphate + thioredoxin disulfide + H2O = ribonucleoside diphosphate + thioredoxin. Thioredoxin disulfide is the oxidized form of thioredoxin.	50% (1/2)	0.031663890	1.50	YER070W	RNR1	MF	Activation
GO:0016728	oxidoreductase activity, acting on CH or CH2 groups, disulfide as acceptor	Catalysis of an oxidation-reduction (redox) reaction in which a CH2 group acts as a hydrogen or electron donor and reduces a disulfide group.	50% (1/2)	0.031663890	1.50	YER070W	RNR1	MF	Activation
GO:0018456	aryl-alcohol dehydrogenase (NAD+) activity	Catalysis of the reaction: an aromatic alcohol + NAD+ = an aromatic aldehyde + NADH + H+.	50% (1/2)	0.031663890	1.50	YPL088W	NA	MF	Activation
GO:0004300	enoyl-CoA hydratase activity	Catalysis of the reaction: (3S)-3-hydroxyacyl-CoA = trans-2-enoyl-CoA + H2O.	50% (1/2)	0.031663890	1.50	YKR009C	FOX2	MF	Activation
GO:0004558	alpha-1,4-glucosidase activity	Catalysis of the hydrolysis of terminal, non-reducing alpha-(1->4)-linked alpha-D-glucose residues with release of alpha-D-glucose.	50% (1/2)	0.031663890	1.50	YDR221W	GTB1	MF	Activation
GO:0004309	exopolyphosphatase activity	Catalysis of the reaction: polyphosphate(n) + H2O = polyphosphate(n-1) + phosphate.	50% (1/2)	0.031663890	1.50	YHR201C	PPX1	MF	Activation
GO:0061731	ribonucleoside-diphosphate reductase activity	Catalysis of the formation of 2'-deoxyribonucleoside diphosphate from ribonucleoside diphosphate, using either thioredoxin disulfide or glutaredoxin disulfide as an acceptor.	50% (1/2)	0.031663890	1.50	YER070W	RNR1	MF	Activation
GO:0033764	steroid dehydrogenase activity, acting on the CH-OH group of donors, NAD or NADP as acceptor	Catalysis of an oxidation-reduction (redox) reaction in which a CH-OH group acts as a hydrogen or electron donor and reduces NAD+ or NADP, and in which one substrate is a sterol derivative.	50% (1/2)	0.031663890	1.50	YKR009C	FOX2	MF	Activation
GO:0047681	aryl-alcohol dehydrogenase (NADP+) activity	Catalysis of the reaction: an aromatic alcohol + NADP+ = an aromatic aldehyde + NADPH.	50% (1/2)	0.031663890	1.50	YPL088W	NA	MF	Activation
GO:0008239	dipeptidyl-peptidase activity	Catalysis of the hydrolysis of N-terminal dipeptides from a polypeptide chain.	50% (1/2)	0.031663890	1.50	YOL057W	NA	MF	Activation
GO:0044769	ATPase activity, coupled to transmembrane movement of ions, rotational mechanism	Enables the transfer of ions from one side of a membrane to the other according to the reaction: ATP + H2O + ion(in) = ADP + phosphate + ion(out), by a rotational mechanism.	10.526% (2/19)	0.036032530	1.44	YLR447C;YPR036W	VMA6;VMA13	MF	Activation
GO:0046961	proton-transporting ATPase activity, rotational mechanism	Enables the transfer of protons from one side of a membrane to the other according to the reaction: ATP + H2O + H+(in) = ADP + phosphate + H+(out), by a rotational mechanism.	10.526% (2/19)	0.036032530	1.44	YLR447C;YPR036W	VMA6;VMA13	MF	Activation
GO:0001883	purine nucleoside binding	Interacting selectively and non-covalently with a purine nucleoside, a compound consisting of a purine base linked either to ribose or deoxyribose.	4.762% (4/84)	0.044137260	1.36	YDL137W;YGL210W;YHR168W;YNL098C	ARF2;YPT32;MTG2;RAS2	MF	Activation
GO:0009678	pyrophosphate hydrolysis-driven proton transmembrane transporter activity	Enables the transmembrane transport of one proton (H+), driven by the hydrolysis of pyrophosphate, and generating a proton motive force.	9.524% (2/21)	0.043359000	1.36	YLR447C;YPR036W	VMA6;VMA13	MF	Activation
GO:0032561	guanyl ribonucleotide binding	Interacting selectively and non-covalently with a guanyl ribonucleotide, any compound consisting of guanosine esterified with (ortho)phosphate or an oligophosphate at any hydroxyl group on the ribose moiety.	4.762% (4/84)	0.044137260	1.36	YDL137W;YGL210W;YHR168W;YNL098C	ARF2;YPT32;MTG2;RAS2	MF	Activation
GO:0005525	GTP binding	Interacting selectively and non-covalently with GTP, guanosine triphosphate.	4.762% (4/84)	0.044137260	1.36	YDL137W;YGL210W;YHR168W;YNL098C	ARF2;YPT32;MTG2;RAS2	MF	Activation
GO:0032550	purine ribonucleoside binding	Interacting selectively and non-covalently with a purine ribonucleoside, a compound consisting of a purine base linked to ribose.	4.762% (4/84)	0.044137260	1.36	YDL137W;YGL210W;YHR168W;YNL098C	ARF2;YPT32;MTG2;RAS2	MF	Activation
GO:0019001	guanyl nucleotide binding	Interacting selectively and non-covalently with guanyl nucleotides, any compound consisting of guanosine esterified with (ortho)phosphate.	4.762% (4/84)	0.044137260	1.36	YDL137W;YGL210W;YHR168W;YNL098C	ARF2;YPT32;MTG2;RAS2	MF	Activation
GO:0070569	uridylyltransferase activity	Catalysis of the transfer of an uridylyl group to an acceptor.	33.333% (1/3)	0.047123210	1.33	YHL012W	NA	MF	Activation
GO:0016229	steroid dehydrogenase activity	Catalysis of an oxidation-reduction (redox) reaction in which one substrate is a sterol derivative.	33.333% (1/3)	0.047123210	1.33	YKR009C	FOX2	MF	Activation
GO:0004340	glucokinase activity	Catalysis of the reaction: ATP + D-glucose = ADP + D-glucose-6-phosphate.	33.333% (1/3)	0.047123210	1.33	YLR446W	NA	MF	Activation
GO:0010484	H3 histone acetyltransferase activity	Catalysis of the reaction: acetyl-CoA + histone H3 = CoA + acetyl-histone H3.	33.333% (1/3)	0.047123210	1.33	YJL127C	SPT10	MF	Activation
GO:0016725	oxidoreductase activity, acting on CH or CH2 groups	Catalysis of an oxidation-reduction (redox) reaction in which a CH2 group acts as a hydrogen or electron donor and reduces a hydrogen or electron acceptor.	33.333% (1/3)	0.047123210	1.33	YER070W	RNR1	MF	Activation
GO:0004396	hexokinase activity	Catalysis of the reaction: ATP + D-hexose = ADP + D-hexose 6-phosphate.	33.333% (1/3)	0.047123210	1.33	YLR446W	NA	MF	Activation
GO:1901265	nucleoside phosphate binding	NA	2.458% (16/651)	0.047026710	1.33	YDL137W;YDR454C;YER070W;YER176W;YGL210W;YGR040W;YGR262C;YHR168W;YHR169W;YIL094C;YLR396C;YLR446W;YML086C;YNL098C;YOL058W;YOL113W	ARF2;GUK1;RNR1;ECM32;YPT32;KSS1;BUD32;MTG2;DBP8;LYS12;VPS33;;ALO1;RAS2;ARG1;SKM1	MF	Activation
GO:0000166	nucleotide binding	Interacting selectively and non-covalently with a nucleotide, any compound consisting of a nucleoside that is esterified with (ortho)phosphate or an oligophosphate at any hydroxyl group on the ribose or deoxyribose.	2.458% (16/651)	0.047026710	1.33	YDL137W;YDR454C;YER070W;YER176W;YGL210W;YGR040W;YGR262C;YHR168W;YHR169W;YIL094C;YLR396C;YLR446W;YML086C;YNL098C;YOL058W;YOL113W	ARF2;GUK1;RNR1;ECM32;YPT32;KSS1;BUD32;MTG2;DBP8;LYS12;VPS33;;ALO1;RAS2;ARG1;SKM1	MF	Activation
GO:0004707	MAP kinase activity	Catalysis of the reaction: protein + ATP = protein phosphate + ADP. This reaction is the phosphorylation of proteins. Mitogen-activated protein kinase; a family of protein kinases that perform a crucial step in relaying signals from the plasma membrane to the nucleus. They are activated by a wide range of proliferation- or differentiation-inducing signals; activation is strong with agonists such …	33.333% (1/3)	0.047123210	1.33	YGR040W	KSS1	MF	Activation
GO:0019158	mannokinase activity	Catalysis of the reaction: ATP + D-mannose = ADP + D-mannose 6-phosphate.	33.333% (1/3)	0.047123210	1.33	YLR446W	NA	MF	Activation
GO:0008865	fructokinase activity	Catalysis of the reaction: ATP + D-fructose = ADP + D-fructose 6-phosphate.	33.333% (1/3)	0.047123210	1.33	YLR446W	NA	MF	Activation
GO:0002020	protease binding	Interacting selectively and non-covalently with any protease or peptidase.	33.333% (1/3)	0.047123210	1.33	YMR174C	PAI3	MF	Activation
GO:0032549	ribonucleoside binding	Interacting selectively and non-covalently with a ribonucleoside, a compound consisting of a purine or pyrimidine nitrogenous base linked to ribose.	4.651% (4/86)	0.047450090	1.32	YDL137W;YGL210W;YHR168W;YNL098C	ARF2;YPT32;MTG2;RAS2	MF	Activation
GO:0036094	small molecule binding	Interacting selectively and non-covalently with a small molecule, any low molecular weight, monomeric, non-encoded molecule.	2.405% (17/707)	0.048677360	1.31	YDL137W;YDR454C;YER070W;YER176W;YGL210W;YGR040W;YGR262C;YHR168W;YHR169W;YIL094C;YJL012C;YLR396C;YLR446W;YML086C;YNL098C;YOL058W;YOL113W	ARF2;GUK1;RNR1;ECM32;YPT32;KSS1;BUD32;MTG2;DBP8;LYS12;VTC4;VPS33;;ALO1;RAS2;ARG1;SKM1	MF	Activation
GO:0001882	nucleoside binding	Interacting selectively and non-covalently with a nucleoside, a compound consisting of a purine or pyrimidine nitrogenous base linked either to ribose or deoxyribose.	4.598% (4/87)	0.049157350	1.31	YDL137W;YGL210W;YHR168W;YNL098C	ARF2;YPT32;MTG2;RAS2	MF	Activation
