# Supplementary material for: Large scale microfluidic CRISPR screening for increased amylase secretion in yeast
Source: Lab Chip. Author manuscript; Available in PMC 2023 Aug 15. (PMC7614956; doi:10.1039/d3lc00111c)
Supplement: ESI 8 [file EMS184631-supplement-ESI_8.xlsx]

## Sheet: README
Table S3: Experimental results for validation of target genes
Tabs	Description
Validation_amylase_secretion	Measurements of secreted amylase and OD 600 in gene deletion or gene overexpression experiments
Validation_amylase_secretion
Header	Description
ID	Culture ID
Rep	Replicate
Round	Experimental round
Medium	Growth medium
Experiment	Gene overexpression or deletion
Type	Sample or control category
Gene	Sample or control name
Hour	Hours of growth
Sample	Amylase sample
Blank	Amylase blank correction
Sample_corrected	Amylase sample blank corrected
Percent_of_control	Percent of sample/control in percent
Amylase_units_U	Calculated amylase units according to protocol
Measured_OD	Measured OD after sample dilution
Actual_OD	Actual OD
Relative_amylase_units	Amylase units/Actual OD
Percent_of_control_OD	Relative amylase units/control in percent

## Sheet: Validation_amylase_secretion
ID	Rep	Round	Medium	Experiment	Type	Gene	Hour	Sample	Blank	Sample_corrected	Percent_of_control	Amylase_units_U	Measured_OD	Actual_OD	Relative_amylase_units	Percent_of_control_OD
1	1	2	YPAD	OVEREXPRESSION	GENE	ALP1	24	0.198	0.002	0.196	101.0309278	1.840883978	0.096	9.6	0.191758748	95.76890034
2	1	2	YPAD	OVEREXPRESSION	GENE	BNA7	24	0.17	0.003	0.167	86.08247423	1.568508287	0.064	6.4	0.24507942	122.398518
5	1	2	YPAD	OVEREXPRESSION	GENE	DAP1	24	0.204	0.003	0.201	103.6082474	1.887845304	0.097	9.7	0.194623227	97.19948985
6	1	2	YPAD	OVEREXPRESSION	GENE	ENO2	24	0.25	0.002	0.248	127.8350515	2.329281768	0.117	11.7	0.199083912	99.42726231
7	1	2	YPAD	OVEREXPRESSION	GENE	GMH1	24	0.184	0.004	0.18	92.78350515	1.690607735	0.105	10.5	0.161010261	80.41237113
11	1	2	YPAD	OVEREXPRESSION	GENE	NMA2	24	0.244	0.003	0.241	124.2268041	2.263535912	0.122	12.2	0.185535731	92.66097685
15	1	2	YPAD	OVEREXPRESSION	GENE	PRY2	24	0.221	0.001	0.22	113.4020619	2.066298343	0.095	9.5	0.217505089	108.6272382
19	1	2	YPAD	OVEREXPRESSION	GENE	SUT074	24	0.222	0.003	0.219	112.8865979	2.056906077	0.101	10.1	0.203654067	101.7097071
20	1	2	YPAD	OVEREXPRESSION	GENE	TFG2	24	0.238	0.002	0.236	121.6494845	2.216574586	0.107	10.7	0.207156503	103.4589074
21	1	2	YPAD	OVEREXPRESSION	GENE	TOM22	24	0.216	0.002	0.214	110.3092784	2.009944751	0.086	8.6	0.233714506	116.7226085
22	1	2	YPAD	OVEREXPRESSION	GENE	TRS20	24	0.179	0.003	0.176	90.72164948	1.653038674	0.08	8	0.206629834	103.1958763
23	1	2	YPAD	OVEREXPRESSION	CNTRL	p427-TEF	24	0.196	0.002	0.194	100	1.822099448	0.091	9.1	0.200230709	100
1	1	2	YPAD	OVEREXPRESSION	GENE	ALP1	48	0.426	0.001	0.425	116.4383562	3.991712707	0.274	27.4	0.145682946	103.689631
2	1	2	YPAD	OVEREXPRESSION	GENE	BNA7	48	0.401	0	0.401	109.8630137	3.766298343	0.221	22.1	0.17042074	121.296721
5	1	2	YPAD	OVEREXPRESSION	GENE	DAP1	48	0.409	0	0.409	112.0547945	3.841436464	0.259	25.9	0.14831801	105.5651346
6	1	2	YPAD	OVEREXPRESSION	GENE	ENO2	48	0.482	0.001	0.481	131.7808219	4.517679558	0.254	25.4	0.1778614	126.5926006
7	1	2	YPAD	OVEREXPRESSION	GENE	GMH1	48	0.434	0.01	0.424	116.1643836	3.982320442	0.27	27	0.14749335	104.9781837
11	1	2	YPAD	OVEREXPRESSION	GENE	NMA2	48	0.487	0.002	0.485	132.8767123	4.555248619	0.291	29.1	0.156537753	111.4155251
15	1	2	YPAD	OVEREXPRESSION	GENE	PRY2	48	0.494	0	0.494	135.3424658	4.639779006	0.28	28	0.165706393	117.9412916
19	1	2	YPAD	OVEREXPRESSION	GENE	SUT074	48	0.44	0.001	0.439	120.2739726	4.12320442	0.268	26.8	0.153850911	109.5031691
20	1	2	YPAD	OVEREXPRESSION	GENE	TFG2	48	0.487	0.001	0.486	133.1506849	4.564640884	0.285	28.5	0.160162838	113.9956741
21	1	2	YPAD	OVEREXPRESSION	GENE	TOM22	48	0.436	0	0.436	119.4520548	4.095027624	0.244	24.4	0.167829001	119.4520548
22	1	2	YPAD	OVEREXPRESSION	GENE	TRS20	48	0.329	0.001	0.328	89.8630137	3.080662983	0.242	24.2	0.127300123	90.60568323
23	1	2	YPAD	OVEREXPRESSION	CNTRL	p427-TEF	48	0.365	0	0.365	100	3.428176796	0.244	24.4	0.140499049	100
3	1	3	YPAD	OVEREXPRESSION	GENE	BNA7	24	0.28	-0.004	0.284	107.7798861	2.667403315	0.105	10.5	0.254038411	147.2964156
4	2	3	YPAD	OVEREXPRESSION	GENE	BNA7	24	0.28	-0.004	0.284	107.7798861	2.667403315	0.101	10.1	0.264099338	153.129937
11	1	3	YPAD	OVEREXPRESSION	GENE	TFG2	24	0.297	-0.004	0.301	114.2314991	2.827071823	0.151	15.1	0.1872233	108.5557134
12	2	3	YPAD	OVEREXPRESSION	GENE	TFG2	24	0.294	-0.004	0.298	113.0929791	2.798895028	0.152	15.2	0.184137831	106.7666986
15	1	3	YPAD	OVEREXPRESSION	CNTRL	p427-TEF	24	0.259	-0.004	0.263	99.81024668	2.470165746	0.144	14.4	0.171539288	99.46181818
16	2	3	YPAD	OVEREXPRESSION	CNTRL	p427-TEF	24	0.261	-0.003	0.264	100.1897533	2.479558011	0.143	14.3	0.173395665	100.5381818
1	1	4	YPAD	OVEREXPRESSION	GENE	ALP1	4	0.028	0.005	0.023	131.4285714	0.04320442	0.037	0.074	0.583843512	71.04247104
1	2	4	YPAD	OVEREXPRESSION	GENE	ALP1	4	0.032	0.004	0.028	160	0.052596685	0.042	0.084	0.626151013	76.19047619
2	1	4	YPAD	OVEREXPRESSION	GENE	BNA7	4	0.026	0.002	0.024	137.1428571	0.045082873	0.023	0.046	0.980062455	119.2546584
2	2	4	YPAD	OVEREXPRESSION	GENE	BNA7	4	0.026	0.004	0.022	125.7142857	0.041325967	0.024	0.048	0.860957643	104.7619048
5	1	4	YPAD	OVEREXPRESSION	GENE	DAP1	4	0.025	0.003	0.022	125.7142857	0.041325967	0.027	0.054	0.765295682	93.12169312
5	2	4	YPAD	OVEREXPRESSION	GENE	DAP1	4	0.025	0.004	0.021	120	0.039447514	0.021	0.042	0.939226519	114.2857143
6	1	4	YPAD	OVEREXPRESSION	GENE	ENO2	4	0.028	0.004	0.024	137.1428571	0.045082873	0.03	0.06	0.751381216	91.42857143
6	2	4	YPAD	OVEREXPRESSION	GENE	ENO2	4	0.03	0.003	0.027	154.2857143	0.050718232	0.037	0.074	0.685381514	83.3976834
7	1	4	YPAD	OVEREXPRESSION	GENE	GMH1	4	0.026	0.002	0.024	137.1428571	0.045082873	0.032	0.064	0.70441989	85.71428571
7	2	4	YPAD	OVEREXPRESSION	GENE	GMH1	4	0.028	0.004	0.024	137.1428571	0.045082873	0.035	0.07	0.644041042	78.36734694
11	1	4	YPAD	OVEREXPRESSION	GENE	NMA2	4	0.028	0.003	0.025	142.8571429	0.046961326	0.029	0.058	0.809678034	98.52216749
11	2	4	YPAD	OVEREXPRESSION	GENE	NMA2	4	0.03	0.004	0.026	148.5714286	0.048839779	0.035	0.07	0.697711129	84.89795918
15	1	4	YPAD	OVEREXPRESSION	GENE	PRY2	4	0.03	0.002	0.028	160	0.052596685	0.039	0.078	0.674316475	82.05128205
15	2	4	YPAD	OVEREXPRESSION	GENE	PRY2	4	0.029	0.005	0.024	137.1428571	0.045082873	0.038	0.076	0.593195696	72.18045113
19	1	4	YPAD	OVEREXPRESSION	GENE	SUT074	4	0.028	0.005	0.023	131.4285714	0.04320442	0.033	0.066	0.654612423	79.65367965
19	2	4	YPAD	OVEREXPRESSION	GENE	SUT074	4	0.028	0.004	0.024	137.1428571	0.045082873	0.034	0.068	0.662983425	80.67226891
20	1	4	YPAD	OVEREXPRESSION	GENE	TFG2	4	0.031	0.004	0.027	154.2857143	0.050718232	0.04	0.08	0.633977901	77.14285714
20	2	4	YPAD	OVEREXPRESSION	GENE	TFG2	4	0.031	0.004	0.027	154.2857143	0.050718232	0.04	0.08	0.633977901	77.14285714
21	1	4	YPAD	OVEREXPRESSION	GENE	TOM22	4	0.023	0.002	0.021	120	0.039447514	0.019	0.038	1.038092469	126.3157895
21	2	4	YPAD	OVEREXPRESSION	GENE	TOM22	4	0.021	0.003	0.018	102.8571429	0.033812155	0.022	0.044	0.768458061	93.50649351
22	1	4	YPAD	OVEREXPRESSION	GENE	TRS20	4	0.021	0.004	0.017	97.14285714	0.031933702	0.022	0.044	0.725765947	88.31168831
22	2	4	YPAD	OVEREXPRESSION	GENE	TRS20	4	0.02	0.003	0.017	97.14285714	0.031933702	0.019	0.038	0.84036057	102.2556391
23	1	4	YPAD	OVEREXPRESSION	CNTRL	p427-TEF	4	0.021	0.004	0.017	97.14285714	0.031933702	0.02	0.04	0.798342541	97.14285714
23	2	4	YPAD	OVEREXPRESSION	CNTRL	p427-TEF	4	0.022	0.004	0.018	102.8571429	0.033812155	0.02	0.04	0.845303867	102.8571429
1	1	4	YPAD	OVEREXPRESSION	GENE	ALP1	24	0.325	0	0.325	122.8733459	3.052486188	0.163	16.3	0.187269091	96.49073448
1	2	4	YPAD	OVEREXPRESSION	GENE	ALP1	24	0.314	0.002	0.312	117.9584121	2.93038674	0.162	16.2	0.18088807	93.20290205
2	1	4	YPAD	OVEREXPRESSION	GENE	BNA7	24	0.241	0.002	0.239	90.35916824	2.244751381	0.086	8.6	0.261017603	134.4897869
2	2	4	YPAD	OVEREXPRESSION	GENE	BNA7	24	0.234	0.001	0.233	88.09073724	2.18839779	0.086	8.6	0.254464859	131.1134742
5	1	4	YPAD	OVEREXPRESSION	GENE	DAP1	24	0.326	0.003	0.323	122.1172023	3.033701658	0.164	16.4	0.184981808	95.31220787
5	2	4	YPAD	OVEREXPRESSION	GENE	DAP1	24	0.318	0.003	0.315	119.0926276	2.958563536	0.16	16	0.184910221	95.27532234
6	1	4	YPAD	OVEREXPRESSION	GENE	ENO2	24	0.338	0.003	0.335	126.6540643	3.14640884	0.177	17.7	0.177763211	91.5928128
6	2	4	YPAD	OVEREXPRESSION	GENE	ENO2	24	0.345	0.001	0.344	130.0567108	3.230939227	0.175	17.5	0.184625099	95.12841255
7	1	4	YPAD	OVEREXPRESSION	GENE	GMH1	24	0.253	-0.001	0.254	96.03024575	2.385635359	0.164	16.4	0.145465571	74.95139567
7	2	4	YPAD	OVEREXPRESSION	GENE	GMH1	24	0.258	0.002	0.256	96.78638941	2.40441989	0.164	16.4	0.146610969	75.54156414
11	1	4	YPAD	OVEREXPRESSION	GENE	NMA2	24	0.338	0.003	0.335	126.6540643	3.14640884	0.177	17.7	0.177763211	91.5928128
11	2	4	YPAD	OVEREXPRESSION	GENE	NMA2	24	0.347	0.002	0.345	130.4347826	3.240331492	0.17	17	0.190607735	98.21097653
15	1	4	YPAD	OVEREXPRESSION	GENE	PRY2	24	0.345	-0.001	0.346	130.8128544	3.249723757	0.175	17.5	0.1856985	95.68148472
15	2	4	YPAD	OVEREXPRESSION	GENE	PRY2	24	0.353	-0.001	0.354	133.8374291	3.324861879	0.175	17.5	0.189992107	97.89377338
19	1	4	YPAD	OVEREXPRESSION	GENE	SUT074	24	0.341	0	0.341	128.9224953	3.202762431	0.185	18.5	0.173122294	89.20157164
19	2	4	YPAD	OVEREXPRESSION	GENE	SUT074	24	0.346	0	0.346	130.8128544	3.249723757	0.183	18.3	0.177580533	91.49868757
20	1	4	YPAD	OVEREXPRESSION	GENE	TFG2	24	0.362	0.001	0.361	136.4839319	3.390607735	0.185	18.5	0.183276094	94.43333537
20	2	4	YPAD	OVEREXPRESSION	GENE	TFG2	24	0.349	0.001	0.348	131.5689981	3.268508287	0.178	17.8	0.183624061	94.61262615
21	1	4	YPAD	OVEREXPRESSION	GENE	TOM22	24	0.315	0.001	0.314	118.7145558	2.949171271	0.125	12.5	0.235933702	121.5652621
21	2	4	YPAD	OVEREXPRESSION	GENE	TOM22	24	0.323	0	0.323	122.1172023	3.033701658	0.133	13.3	0.228097869	117.5278353
22	1	4	YPAD	OVEREXPRESSION	GENE	TRS20	24	0.262	-0.001	0.263	99.43289225	2.470165746	0.126	12.6	0.196044901	101.0124859
22	2	4	YPAD	OVEREXPRESSION	GENE	TRS20	24	0.256	0	0.256	96.78638941	2.40441989	0.123	12.3	0.195481292	100.7220855
23	1	4	YPAD	OVEREXPRESSION	CNTRL	p427-TEF	24	0.267	0	0.267	100.9451796	2.507734807	0.129	12.9	0.194398047	100.1639417
23	2	4	YPAD	OVEREXPRESSION	CNTRL	p427-TEF	24	0.263	0.001	0.262	99.05482042	2.460773481	0.127	12.7	0.193761691	99.83605831
1	1	4	YPAD	OVEREXPRESSION	GENE	ALP1	48	0.333	-0.002	0.335	123.844732	6.29281768	0.293	29.3	0.214771935	117.0316325
1	2	4	YPAD	OVEREXPRESSION	GENE	ALP1	48	0.315	-0.002	0.317	117.1903882	5.954696133	0.27	27	0.220544301	120.1770598
2	1	4	YPAD	OVEREXPRESSION	GENE	BNA7	48	0.297	-0.003	0.3	110.9057301	5.635359116	0.227	22.7	0.248253706	135.2762246
2	2	4	YPAD	OVEREXPRESSION	GENE	BNA7	48	0.311	-0.002	0.313	115.7116451	5.879558011	0.227	22.7	0.259011366	141.1381943
5	1	4	YPAD	OVEREXPRESSION	GENE	DAP1	48	0.332	-0.002	0.334	123.4750462	6.274033149	0.289	28.9	0.217094573	118.2972641
5	2	4	YPAD	OVEREXPRESSION	GENE	DAP1	48	0.32	-0.003	0.323	119.4085028	6.067403315	0.294	29.4	0.206374262	112.455647
6	1	4	YPAD	OVEREXPRESSION	GENE	ENO2	48	0.337	-0.002	0.339	125.323475	6.367955801	0.306	30.6	0.208103131	113.3977267
6	2	4	YPAD	OVEREXPRESSION	GENE	ENO2	48	0.346	-0.001	0.347	128.2809612	6.518232044	0.286	28.6	0.227910211	124.1908268
7	1	4	YPAD	OVEREXPRESSION	GENE	GMH1	48	0.32	-0.002	0.322	119.038817	6.048618785	0.269	26.9	0.224855717	122.5263985
7	2	4	YPAD	OVEREXPRESSION	GENE	GMH1	48	0.335	-0.002	0.337	124.5841035	6.33038674	0.262	26.2	0.241617815	131.6602533
11	1	4	YPAD	OVEREXPRESSION	GENE	NMA2	48	0.344	-0.002	0.346	127.9112754	6.499447514	0.299	29.9	0.217372827	118.4488878
11	2	4	YPAD	OVEREXPRESSION	GENE	NMA2	48	0.356	-0.002	0.358	132.3475046	6.724861879	0.297	29.7	0.226426326	123.3822409
15	1	4	YPAD	OVEREXPRESSION	GENE	PRY2	48	0.364	-0.002	0.366	135.3049908	6.875138122	0.3	30	0.229171271	124.8779921
15	2	4	YPAD	OVEREXPRESSION	GENE	PRY2	48	0.365	-0.002	0.367	135.6746765	6.893922652	0.267	26.7	0.25819935	140.6957178
19	1	4	YPAD	OVEREXPRESSION	GENE	SUT074	48	0.34	-0.003	0.343	126.8022181	6.443093923	0.292	29.2	0.220653902	120.2367822
19	2	4	YPAD	OVEREXPRESSION	GENE	SUT074	48	0.336	-0.003	0.339	125.323475	6.367955801	0.289	28.9	0.220344491	120.0681812
20	1	4	YPAD	OVEREXPRESSION	GENE	TFG2	48	0.349	-0.002	0.351	129.7597043	6.593370166	0.3	30	0.219779006	119.7600416
20	2	4	YPAD	OVEREXPRESSION	GENE	TFG2	48	0.35	-0.001	0.351	129.7597043	6.593370166	0.29	29	0.227357592	123.8896982
21	1	4	YPAD	OVEREXPRESSION	GENE	TOM22	48	0.343	-0.002	0.345	127.5415896	6.480662983	0.222	22.2	0.291921756	159.0714344
21	2	4	YPAD	OVEREXPRESSION	GENE	TOM22	48	0.329	-0.001	0.33	121.9963031	6.198895028	0.215	21.5	0.288320699	157.1091781
22	1	4	YPAD	OVEREXPRESSION	GENE	TRS20	48	0.274	-0.002	0.276	102.0332717	5.184530387	0.254	25.4	0.20411537	111.224751
22	2	4	YPAD	OVEREXPRESSION	GENE	TRS20	48	0.273	-0.002	0.275	101.663586	5.165745856	0.274	27.4	0.188530871	102.732583
23	1	4	YPAD	OVEREXPRESSION	CNTRL	p427-TEF	48	0.269	-0.002	0.271	100.1848429	5.090607735	0.283	28.3	0.179880132	98.01869857
23	2	4	YPAD	OVEREXPRESSION	CNTRL	p427-TEF	48	0.267	-0.003	0.27	99.81515712	5.071823204	0.271	27.1	0.187152148	101.9813014
24	1	2	YPAD	DELETION	GENE	YDR262W	4	0.052	-0.004	0.056	113.1313131	0.262983425	0.086	0.86	0.305794681	102.5665743
24	2	2	YPAD	DELETION	GENE	YDR262W	4	0.053	-0.003	0.056	113.1313131	0.262983425	0.083	0.83	0.316847501	106.2737999
25	1	2	YPAD	DELETION	GENE	TLG2	4	0.049	-0.004	0.053	107.0707071	0.248895028	0.072	0.72	0.345687538	115.9470351
25	2	2	YPAD	DELETION	GENE	TLG2	4	0.052	-0.003	0.055	111.1111111	0.258287293	0.075	0.75	0.344383057	115.5094991
26	1	2	YPAD	DELETION	GENE	INP51	4	0.037	-0.002	0.039	78.78787879	0.183149171	0.052	0.52	0.352209945	118.134715
26	2	2	YPAD	DELETION	GENE	INP51	4	0.036	-0.002	0.038	76.76767677	0.178453039	0.049	0.49	0.364189875	122.1529026
27	1	2	YPAD	DELETION	GENE	MNT2	4	0.053	0	0.053	107.0707071	0.248895028	0.087	0.87	0.286086239	95.95616699
27	2	2	YPAD	DELETION	GENE	MNT2	4	0.052	-0.005	0.057	115.1515152	0.267679558	0.085	0.85	0.314917127	105.6263334
28	1	2	YPAD	DELETION	GENE	TPO2	4	0.055	-0.004	0.059	119.1919192	0.277071823	0.087	0.87	0.31847336	106.8191293
28	2	2	YPAD	DELETION	GENE	TPO2	4	0.053	-0.005	0.058	117.1717172	0.272375691	0.087	0.87	0.313075506	105.0086356
29	1	2	YPAD	DELETION	GENE	HDA2	4	0.05	-0.004	0.054	109.0909091	0.25359116	0.076	0.76	0.333672579	111.9170984
29	2	2	YPAD	DELETION	GENE	HDA2	4	0.051	-0.004	0.055	111.1111111	0.258287293	0.08	0.8	0.322859116	108.2901554
30	1	2	YPAD	DELETION	CNTRL	D1b.sec2	4	0.046	-0.003	0.049	98.98989899	0.230110497	0.076	0.76	0.30277697	101.5544041
30	2	2	YPAD	DELETION	CNTRL	D1b.sec2	4	0.047	-0.003	0.05	101.010101	0.23480663	0.08	0.8	0.293508287	98.44559585
24	1	2	YPAD	DELETION	GENE	YDR262W	24	0.337	0	0.337	110.130719	3.16519337	0.197	19.7	0.160669714	105.1102562
24	2	2	YPAD	DELETION	GENE	YDR262W	24	0.31	0	0.31	101.3071895	2.91160221	0.187	18.7	0.155700653	101.8594923
25	1	2	YPAD	DELETION	GENE	TLG2	24	0.321	0	0.321	104.9019608	3.014917127	0.192	19.2	0.157026934	102.7271462
25	2	2	YPAD	DELETION	GENE	TLG2	24	0.315	0	0.315	102.9411765	2.958563536	0.187	18.7	0.158211954	103.5023873
26	1	2	YPAD	DELETION	GENE	INP51	24	0.32	0.001	0.319	104.248366	2.996132597	0.149	14.9	0.201082725	131.5484801
26	2	2	YPAD	DELETION	GENE	INP51	24	0.319	0	0.319	104.248366	2.996132597	0.147	14.7	0.203818544	133.3382553
30	1	2	YPAD	DELETION	GENE	D1b.sec2	24	0.316	0.002	0.314	102.6143791	2.949171271	0.192	19.2	0.15360267	100.4869904
30	2	2	YPAD	DELETION	GENE	D1b.sec2	24	0.301	0.003	0.298	97.38562092	2.798895028	0.184	18.4	0.15211386	99.5130096
24	1	2	YPAD	DELETION	CNTRL	ER_amylase	48	0.287	0	0.287	100.525394	5.391160221	0.147	29.4	0.183372797	98.85473177
24	2	2	YPAD	DELETION	CNTRL	ER_amylase	48	0.284	0	0.284	99.47460595	5.33480663	0.14	28	0.190528808	102.7124774
25	1	2	YPAD	DELETION	GENE	TLG2	48	0.279	0.001	0.278	97.37302977	5.222099448	0.133	26.6	0.196319528	105.8342058
25	2	2	YPAD	DELETION	GENE	TLG2	48	0.273	0	0.273	95.62171629	5.128176796	0.138	27.6	0.185803507	100.1651073
26	1	2	YPAD	DELETION	GENE	INP51	48	0.319	0.001	0.318	111.3835377	5.973480663	0.129	25.8	0.231530258	124.8160141
26	2	2	YPAD	DELETION	GENE	INP51	48	0.315	0.002	0.313	109.6322242	5.879558011	0.127	25.4	0.231478662	124.7881989
30	1	2	YPAD	DELETION	CNTRL	ER_amylase	48	0.299	0.001	0.298	104.3782837	5.597790055	0.149	29.8	0.187845304	101.2658228
30	2	2	YPAD	DELETION	CNTRL	ER_amylase	48	0.274	0.001	0.273	95.62171629	5.128176796	0.14	28	0.183149171	98.73417722
25	1	1	YPAD	DELETION	GENE	TLG2	24	0.329	0.001	0.328	101.2345679	3.080662983	0.195	19.5	0.157982717	98.87203423
25	2	1	YPAD	DELETION	GENE	TLG2	24	0.325	0.002	0.323	99.69135802	3.033701658	0.185	18.5	0.163983873	102.6278028
27	1	1	YPAD	DELETION	GENE	MNT2	24	0.323	0.002	0.321	99.07407407	3.014917127	0.192	19.2	0.157026934	98.27386596
27	2	1	YPAD	DELETION	GENE	MNT2	24	0.317	0.001	0.316	97.5308642	2.967955801	0.183	18.3	0.162183377	101.5009788
28	1	1	YPAD	DELETION	GENE	TPO2	24	0.326	0.002	0.324	100	3.043093923	0.195	19.5	0.156056099	97.66627771
28	2	1	YPAD	DELETION	GENE	TPO2	24	0.327	0.002	0.325	100.308642	3.052486188	0.187	18.7	0.163234556	102.1588491
29	1	1	YPAD	DELETION	GENE	HDA2	24	0.358	0.014	0.344	106.1728395	3.230939227	0.184	18.4	0.175594523	109.8942215
29	2	1	YPAD	DELETION	GENE	HDA2	24	0.358	0.004	0.354	109.2592593	3.324861879	0.181	18.1	0.183694026	114.9632213
30	1	1	YPAD	DELETION	CNTRL	ER_amylase	24	0.323	0.003	0.32	98.7654321	3.005524862	0.186	18.6	0.161587358	101.1279658
30	2	1	YPAD	DELETION	CNTRL	ER_amylase	24	0.335	0.007	0.328	101.2345679	3.080662983	0.195	19.5	0.157982717	98.87203423
25	1	1	YPAD	DELETION	GENE	TLG2	48	0.312	0.001	0.311	92.14814815	5.84198895	0.259	25.9	0.225559419	96.950647
25	2	1	YPAD	DELETION	GENE	TLG2	48	0.311	0.002	0.309	91.55555556	5.80441989	0.253	25.3	0.229423711	98.61160899
27	1	1	YPAD	DELETION	GENE	MNT2	48	0.325	0.003	0.322	95.40740741	6.048618785	0.266	26.6	0.227391684	97.73819668
27	2	1	YPAD	DELETION	GENE	MNT2	48	0.332	0.002	0.33	97.77777778	6.198895028	0.279	27.9	0.222182618	95.49921976
28	1	1	YPAD	DELETION	GENE	TPO2	48	0.327	0.002	0.325	96.2962963	6.104972376	0.271	27.1	0.225275733	96.82871242
28	2	1	YPAD	DELETION	GENE	TPO2	48	0.334	0.002	0.332	98.37037037	6.236464088	0.282	28.2	0.221151209	95.05589649
29	1	1	YPAD	DELETION	GENE	HDA2	48	0.346	0.001	0.345	102.2222222	6.480662983	0.264	26.4	0.245479659	105.512826
29	2	1	YPAD	DELETION	GENE	HDA2	48	0.352	0.001	0.351	104	6.593370166	0.271	27.1	0.243297792	104.5750094
30	1	1	YPAD	DELETION	CNTRL	ER_amylase	48	0.339	0.002	0.337	99.85185185	6.33038674	0.273	27.3	0.231882298	99.66836651
30	2	1	YPAD	DELETION	CNTRL	ER_amylase	48	0.341	0.003	0.338	100.1481481	6.349171271	0.272	27.2	0.233425414	100.3316335
